# Supplementary material
Source: publisher figshare collection journal article supplement (https://gsapubs.figshare.com/ndownloader/files/25774262)
Supplement: Supplementary file 1 [file 25774262]

## Sheet: DR2
				Isotope ratios							Apparent ages (Ma)								Best Ages						Concordance				Reject Filters Combined		Model dates (with systematic error)							Concentrations
		206Pb	U	207Pb*	±1σ	207Pb*	±1σ	206Pb*	±1σ	error	206Pb*	±2σ	Reject	207Pb*	±2σ	206Pb*	±2σ	Reject	900 Ma cut-off		1200 Ma cut-off		1500 Ma cut-off				Reject	Reject			206Pb*		206Pb*		207Pb*
Analysis	U	204Pb	Th	206Pb*	%	235U*	%	238U	%	corr.	238U*	Ma	>10% 2σ	235U	Ma	207Pb*	Ma	>10% 2σ	"Best Age"	±2σ	"Best Age"	±2σ	"Best Age"	±2σ	disc.	±2σ	>10% 2σ	<-5% 2σ			238U*	±2σ	207Pb*	±2σ	235U	±2σ		P	Ti	Y	Nb	La	Ce	Pr	Nd	Sm	Eu	Gd	Tb
J1009-435, Jones Ridge Fm, Tatonduk inlier (Cambrian), University of Arizona, n=87/100
42	122.122	59749.7	1.31559	0.074769	0.950008	1.78982	1.37786	0.173615	0.997993	0.724305	1032	18.6536		1041.76	17.5929	1062.32	37.4981		1062.32	37.4981	1032	18.6536	1032	18.6536	2.85419	3.85253
14	124.207	31786.6	1.91187	0.0743991	2.16984	1.80284	2.63276	0.175747	1.49105	0.566345	1043.7	28.1607		1046.49	33.7053	1052.33	85.7096		1052.33	85.7096	1043.7	28.1607	1043.7	28.1607	0.820406	8.50961
16	74.7323	34955.9	1.30896	0.0729289	1.95072	1.77275	2.71521	0.176298	1.88867	0.695588	1046.72	35.7651		1035.53	34.5517	1011.96	77.5116		1011.96	77.5116	1046.72	35.7651	1046.72	35.7651	-3.43478	8.67522
77	233.185	193914	1.73805	0.0763715	0.651373	1.91386	0.856739	0.181751	0.55652	0.64958	1076.53	10.8145		1085.93	11.199	1104.81	25.5584		1104.81	25.5584	1076.53	10.8145	1076.53	10.8145	2.55913	2.45753
88	198.275	54378.3	1.08889	0.075319	1.14543	1.89326	1.38903	0.182307	0.785737	0.565674	1079.57	15.3082		1078.73	18.0897	1077.05	45.0521		1077.05	45.0521	1079.57	15.3082	1079.57	15.3082	-0.234124	4.42708
69	92.8701	14667.9	2.06294	0.0747258	2.38224	1.88936	3.87569	0.183376	3.05711	0.788791	1085.39	59.8559		1077.36	50.4476	1061.15	93.9648		1061.15	93.9648	1085.39	59.8559	1085.39	59.8559	-2.28397	10.67
11	384.294	220911	2.93765	0.0756302	0.71709	1.9665	1.20391	0.18858	0.96705	0.803257	1113.68	19.3861		1104.11	15.8832	1085.31	28.1777		1085.31	28.1777	1113.68	19.3861	1113.68	19.3861	-2.61407	3.20755
94	168.479	72419.7	2.84629	0.0783128	1.4265	2.12664	2.35443	0.196952	1.87309	0.795558	1158.92	38.9419		1157.5	31.8732	1154.8	55.5224		1154.8	55.5224	1158.92	38.9419	1158.92	38.9419	-0.357075	5.88671
99	72.8561	34700.7	2.11996	0.0811074	2.82658	2.36799	3.05843	0.211748	1.16809	0.381925	1238.12	25.7904		1233	42.8016	1224.03	108.857		1224.03	108.857	1224.03	108.857	1238.12	25.7904	-1.15139	9.23922
96	177.644	93506.8	2.75089	0.0854883	1.38682	2.72342	1.90351	0.231051	1.30387	0.684981	1340	30.92		1334.87	27.7103	1326.62	52.6282		1326.62	52.6282	1326.62	52.6282	1340	30.92	-1.00887	4.63565
13	99.0109	64364.9	1.03883	0.0881137	1.6723	2.89552	1.84727	0.238332	0.784731	0.424807	1378.02	19.0827		1380.74	27.3277	1384.95	62.9511		1384.95	62.9511	1384.95	62.9511	1378.02	19.0827	0.500325	4.72787
58	73.1054	32438.8	2.33075	0.0905382	2.82284	3.15113	3.17609	0.252425	1.45573	0.45834	1450.97	37.0713		1445.28	47.9914	1436.89	105.523		1436.89	105.523	1436.89	105.523	1450.97	37.0713	-0.980031	7.85179
63	59.9962	45946.5	2.21863	0.0988035	1.65071	3.68244	2.97032	0.27031	2.46941	0.831361	1542.38	66.3932		1567.57	46.4978	1601.64	60.3591		1601.64	60.3591	1601.64	60.3591	1601.64	60.3591	3.70035	5.50947
61	42.6072	22047.6	1.30893	0.0995577	2.28354	3.76325	3.70077	0.274149	2.91224	0.786928	1561.83	79.1723		1584.94	58.2051	1615.82	83.3534		1615.82	83.3534	1615.82	83.3534	1615.82	83.3534	3.34136	6.99076
57	162.439	159070	1.16593	0.101725	0.669866	4.05956	1.33151	0.289435	1.15074	0.864236	1638.7	32.6365		1646.22	21.2625	1655.81	24.3215		1655.81	24.3215	1655.81	24.3215	1655.81	24.3215	1.03323	2.44911
83	134.799	73501.8	2.45823	0.108338	0.786919	4.72662	1.42155	0.316424	1.18388	0.832807	1772.24	35.9547		1771.97	23.3518	1771.63	28.1585		1771.63	28.1585	1771.63	28.1585	1771.63	28.1585	-0.0344095	2.57812
60	178.877	187211	2.7074	0.109233	0.584422	4.84949	2.77499	0.32199	2.71275	0.977572	1799.44	83.4843		1793.53	45.7934	1786.64	20.8728		1786.64	20.8728	1786.64	20.8728	1786.64	20.8728	-0.716347	4.81857
95	242.345	103075	2.20293	0.109349	0.500344	4.78374	1.14485	0.317286	1.02972	0.899442	1776.46	31.3376		1782.05	18.8454	1788.58	17.8651		1788.58	17.8651	1788.58	17.8651	1788.58	17.8651	0.677723	2.01346
35	197.602	32782.2	4.29109	0.109829	0.520571	4.93726	2.66419	0.326036	2.61284	0.980725	1819.14	81.1714		1808.65	44.0984	1796.56	18.5728		1796.56	18.5728	1796.56	18.5728	1796.56	18.5728	-1.25665	4.63783
67	154.002	100653	2.34935	0.109968	0.599571	4.83894	1.5149	0.319141	1.3912	0.918344	1785.53	42.5262		1791.69	24.9867	1798.85	21.3853		1798.85	21.3853	1798.85	21.3853	1798.85	21.3853	0.740516	2.64221
19	25.5811	21667.7	1.03219	0.110335	3.54518	5.16172	4.20576	0.339296	2.26277	0.538016	1883.28	72.4304		1846.33	70.146	1804.92	126.379		1804.92	126.379	1804.92	126.379	1804.92	126.379	-4.34132	8.33547
34	48.5969	155423	1.60447	0.111412	1.52947	5.07605	2.31017	0.330439	1.73136	0.74945	1840.51	54.3324		1832.11	38.4139	1822.57	54.3936		1822.57	54.3936	1822.57	54.3936	1822.57	54.3936	-0.984475	4.23912
38	37.5637	24589.7	0.748448	0.111702	2.15871	5.07773	3.02166	0.329692	2.11434	0.699726	1836.89	66.2384		1832.39	50.2519	1827.27	76.73		1827.27	76.73	1827.27	76.73	1827.27	76.73	-0.526405	5.56414
40	122.215	107847	1.31704	0.111811	0.895129	5.11587	1.93388	0.331845	1.71424	0.886427	1847.32	53.9672		1838.74	32.1969	1829.04	31.8062		1829.04	31.8062	1829.04	31.8062	1829.04	31.8062	-0.999397	3.43375
22	80.389	33891.7	1.80975	0.11196	1.10403	5.25682	2.48298	0.340533	2.22403	0.89571	1889.23	71.3842		1861.88	41.5233	1831.46	39.2186		1831.46	39.2186	1831.46	39.2186	1831.46	39.2186	-3.15477	4.4801
92	78.8159	61078.6	1.22251	0.111971	1.69654	5.08575	2.25195	0.329419	1.48089	0.657602	1835.57	46.3644		1833.73	37.4573	1831.63	60.2661		1831.63	60.2661	1831.63	60.2661	1831.63	60.2661	-0.214704	4.15694
93	79.8207	61377.7	1.33349	0.112038	1.56783	5.01748	1.96932	0.324801	1.19169	0.605127	1813.13	36.9152		1822.28	32.6823	1832.72	55.6854		1832.72	55.6854	1832.72	55.6854	1832.72	55.6854	1.06888	3.61838
65	54.8661	66018.9	1.13857	0.112165	1.65093	5.10011	2.67585	0.329778	2.10584	0.786983	1837.31	65.9853		1836.12	44.5309	1834.77	58.623		1834.77	58.623	1834.77	58.623	1834.77	58.623	-0.138161	4.81362
71	98.3761	55337	1.26033	0.112241	0.767025	5.15244	1.49057	0.332935	1.27807	0.857439	1852.59	40.3349		1844.8	24.8442	1836	27.2342		1836	27.2342	1836	27.2342	1836	27.2342	-0.903839	2.65831
87	88.6418	77417.8	1.00679	0.112312	1.38685	5.01259	1.55247	0.323695	0.69771	0.449421	1807.75	21.5575		1821.45	25.7592	1837.14	49.2294		1837.14	49.2294	1837.14	49.2294	1837.14	49.2294	1.59967	2.88612
62	70.9762	73312.6	1.33517	0.112424	1.19198	5.17222	2.57127	0.333669	2.27829	0.886056	1856.14	72.0204		1848.06	42.888	1838.95	42.3049		1838.95	42.3049	1838.95	42.3049	1838.95	42.3049	-0.934728	4.55299
56	74.6259	36343.9	1.85421	0.112655	1.4727	5.09028	2.36847	0.32771	1.85494	0.783182	1827.27	57.8487		1834.49	39.4016	1842.67	52.2425		1842.67	52.2425	1842.67	52.2425	1842.67	52.2425	0.835389	4.21429
49	100.561	197960	3.22977	0.112874	1.38375	5.08601	1.77599	0.326799	1.11327	0.626846	1822.85	34.6458		1833.77	29.5394	1846.19	49.0691		1846.19	49.0691	1846.19	49.0691	1846.19	49.0691	1.26438	3.22621
81	146.467	117763	2.00843	0.112882	0.901965	5.0901	1.60397	0.327041	1.32634	0.826912	1824.02	41.3		1834.46	26.6815	1846.3	31.9819		1846.3	31.9819	1846.3	31.9819	1846.3	31.9819	1.20658	2.81644
37	161.719	85708.8	1.4293	0.112886	0.735038	5.33524	1.05366	0.342778	0.754924	0.716481	1900.02	24.3493		1874.53	17.6599	1846.37	26.0618		1846.37	26.0618	1846.37	26.0618	1846.37	26.0618	-2.90576	1.96189
27	107.548	177638	1.15347	0.112901	0.845769	5.26604	1.52011	0.338287	1.26309	0.830923	1878.42	40.341		1863.38	25.4258	1846.62	29.9878		1846.62	29.9878	1846.62	29.9878	1846.62	29.9878	-1.72239	2.73884
25	76.4105	90405.1	1.38736	0.11307	1.29441	5.31848	2.33079	0.341143	1.93832	0.831614	1892.17	62.2967		1871.84	39.0499	1849.33	45.8832		1849.33	45.8832	1849.33	45.8832	1849.33	45.8832	-2.31657	4.21803
18	116.127	66962.3	2.74104	0.113164	0.691618	5.31817	1.63921	0.340843	1.48616	0.906633	1890.72	47.733		1871.79	27.4612	1850.82	24.5089		1850.82	24.5089	1850.82	24.5089	1850.82	24.5089	-2.15611	2.91228
70	122.368	63532.3	1.22869	0.11327	0.580674	5.06877	0.773899	0.324554	0.511602	0.661072	1811.93	15.8389		1830.89	12.8641	1852.51	20.5725		1852.51	20.5725	1852.51	20.5725	1852.51	20.5725	2.1905	1.38233
33	44.0455	28984.6	0.748246	0.113325	3.17559	5.29413	3.49784	0.338818	1.46645	0.419246	1880.98	46.891		1867.92	58.5693	1853.4	112.532		1853.4	112.532	1853.4	112.532	1853.4	112.532	-1.48823	6.66121
23	27.3242	30763.9	0.814792	0.113444	1.55663	5.43322	3.18519	0.347355	2.77891	0.872448	1921.95	90.5208		1890.11	53.5495	1855.29	55.1399		1855.29	55.1399	1855.29	55.1399	1855.29	55.1399	-3.59315	5.76926
4	42.9456	37675.9	1.10558	0.113507	1.41848	5.22286	2.09924	0.333722	1.54749	0.737165	1856.4	48.9241		1856.35	35.068	1856.29	50.2395		1856.29	50.2395	1856.29	50.2395	1856.29	50.2395	-0.00580961	3.77783
78	157.289	147828	2.87625	0.113701	0.414751	5.19651	0.734284	0.33147	0.605933	0.825202	1845.5	19.0595		1852.04	12.2552	1859.38	14.6808		1859.38	14.6808	1859.38	14.6808	1859.38	14.6808	0.746114	1.29029
76	42.8848	45723.1	1.42316	0.113717	2.96218	5.13972	3.05149	0.327804	0.732844	0.240159	1827.73	22.8595		1842.7	50.8491	1859.62	104.887		1859.62	104.887	1859.62	104.887	1859.62	104.887	1.71511	5.67813
51	66.447	75601.4	1.62963	0.113976	0.651561	5.31228	1.30941	0.338038	1.13579	0.867406	1877.23	36.2552		1870.84	21.9317	1863.74	23.0532		1863.74	23.0532	1863.74	23.0532	1863.74	23.0532	-0.723792	2.31007
59	75.6929	116288	3.46031	0.114069	1.51284	5.30021	2.9971	0.336997	2.58726	0.863255	1872.21	82.398		1868.9	50.19	1865.2	53.5205		1865.2	53.5205	1865.2	53.5205	1865.2	53.5205	-0.375578	5.27363
9	53.3475	32426	3.91714	0.114791	0.810414	5.48511	1.69644	0.346558	1.49035	0.878515	1918.14	48.4636		1898.27	28.5577	1876.59	28.6302		1876.59	28.6302	1876.59	28.6302	1876.59	28.6302	-2.21418	3.01684
89	34.0598	17119	0.643197	0.115421	1.53733	5.42409	2.26518	0.340833	1.66363	0.734436	1890.68	53.4319		1888.67	38.0677	1886.45	54.2523		1886.45	54.2523	1886.45	54.2523	1886.45	54.2523	-0.224272	4.0411
84	116.284	105039	3.57473	0.115998	0.703596	5.41399	1.2143	0.338507	0.98968	0.815024	1879.48	31.624		1887.07	20.3993	1895.41	24.8		1895.41	24.8	1895.41	24.8	1895.41	24.8	0.840619	2.11353
17	47.265	104666	2.63057	0.116308	2.18807	5.53067	3.53816	0.34488	2.78045	0.785847	1910.1	90.091		1905.38	59.6504	1900.22	77.0926		1900.22	77.0926	1900.22	77.0926	1900.22	77.0926	-0.520275	6.25374
8	63.3215	60479.4	1.66487	0.117446	0.944099	5.79678	1.87409	0.357971	1.61891	0.863841	1972.55	53.921		1945.93	31.8124	1917.7	33.1904		1917.7	33.1904	1917.7	33.1904	1917.7	33.1904	-2.86021	3.32794
44	126.109	68065.8	1.26213	0.11748	0.665876	4.9748	1.63555	0.307121	1.49386	0.913371	1726.53	44.3487		1815.05	27.1037	1918.22	23.4064		1918.22	23.4064	1918.22	23.4064	1918.22	23.4064	9.99349	2.55957
91	146.157	283321	1.06044	0.117532	0.589642	5.59618	1.0464	0.34533	0.86445	0.826119	1912.26	28.0363		1915.51	17.6683	1919.02	20.7242		1919.02	20.7242	1919.02	20.7242	1919.02	20.7242	0.352107	1.81453
97	30.4472	21633.7	0.488697	0.118452	2.14723	5.49339	3.1366	0.336354	2.28642	0.728947	1869.1	72.7125		1899.56	52.8222	1932.99	75.3589		1932.99	75.3589	1932.99	75.3589	1932.99	75.3589	3.30493	5.3255
79	29.3855	32842.1	0.467686	0.11866	2.56251	5.61335	3.90157	0.343096	2.94207	0.754073	1901.55	94.9607		1918.15	65.9302	1936.13	89.9067		1936.13	89.9067	1936.13	89.9067	1936.13	89.9067	1.78602	6.69744
75	52.0129	26830.5	0.815824	0.119153	1.42822	5.77693	1.99313	0.351635	1.39024	0.697514	1942.4	45.698		1942.96	33.8164	1943.54	50.0563		1943.54	50.0563	1943.54	50.0563	1943.54	50.0563	0.0589018	3.48625
20	47.2793	43339.9	0.719591	0.119206	1.73895	5.89898	3.3983	0.358903	2.91967	0.859157	1976.97	97.4328		1961.08	57.8444	1944.34	60.9443		1944.34	60.9443	1944.34	60.9443	1944.34	60.9443	-1.67813	5.93871
55	236.984	268695	0.985197	0.119294	0.493469	5.8531	0.823269	0.355849	0.658985	0.800449	1962.47	21.8527		1954.31	13.9937	1945.66	17.2927		1945.66	17.2927	1945.66	17.2927	1945.66	17.2927	-0.863621	1.43704
80	247.987	2960.16	2.02719	0.12008	2.12225	5.53281	3.32583	0.334174	2.56071	0.769945	1858.58	81.0402		1905.71	56.0721	1957.4	74.268		1957.4	74.268	1957.4	74.268	1957.4	74.268	5.0484	5.48822
26	247.793	255367	1.13987	0.12047	0.143821	6.14072	0.724476	0.36969	0.710057	0.980097	2027.94	24.2149		1996.05	12.3992	1963.19	5.02556		1963.19	5.02556	1963.19	5.02556	1963.19	5.02556	-3.29845	1.26148
21	109.069	104106	3.08033	0.121387	0.913423	6.20214	2.12699	0.370568	1.92087	0.903093	2032.07	65.6211		2004.75	36.4569	1976.7	31.8895		1976.7	31.8895	1976.7	31.8895	1976.7	31.8895	-2.80142	3.71095
68	42.7936	31822.2	4.22417	0.12148	1.51409	5.90564	2.18515	0.352582	1.57557	0.721034	1946.92	51.8932		1962.06	37.1947	1978.06	52.8522		1978.06	52.8522	1978.06	52.8522	1978.06	52.8522	1.57443	3.71464
10	80.7158	68827.9	1.82823	0.121953	1.13522	6.258	1.84424	0.372171	1.45344	0.788097	2039.61	49.809		2012.59	31.6489	1984.98	39.5962		1984.98	39.5962	1984.98	39.5962	1984.98	39.5962	-2.75231	3.24004
82	155.307	190705	0.692717	0.122488	0.473901	6.10616	1.13493	0.361554	1.03125	0.908649	1989.54	34.6001		1991.13	19.4089	1992.77	16.5116		1992.77	16.5116	1992.77	16.5116	1992.77	16.5116	0.162002	1.92328
46	170.967	7036.15	1.96048	0.123611	0.79406	5.39961	2.24988	0.316813	2.10509	0.935648	1774.14	63.9923		1884.79	37.7838	2008.98	27.6178		2008.98	27.6178	2008.98	27.6178	2008.98	27.6178	11.6893	3.40882
85	98.5324	75642.1	1.52012	0.127527	0.756946	6.47776	2.26482	0.368401	2.13459	0.942496	2021.87	72.6107		2042.88	39.0508	2064.15	26.1604		2064.15	26.1604	2064.15	26.1604	2064.15	26.1604	2.04802	3.73033
24	28.6068	22793.2	0.686216	0.128934	2.08499	6.94099	2.95371	0.390438	2.09218	0.708322	2124.86	74.2298		2103.91	51.3921	2083.47	71.9109		2083.47	71.9109	2083.47	71.9109	2083.47	71.9109	-1.98651	5.00842
73	72.4369	86840.4	1.44704	0.130262	0.944862	6.8582	1.60227	0.381848	1.29402	0.807621	2084.91	45.1803		2093.27	27.8315	2101.49	32.5185		2101.49	32.5185	2101.49	32.5185	2101.49	32.5185	0.788867	2.64178
64	137.912	141193	2.55416	0.134133	0.423435	7.33033	1.4412	0.396358	1.37759	0.955865	2152.25	49.4069		2152.51	25.2403	2152.75	14.4872		2152.75	14.4872	2152.75	14.4872	2152.75	14.4872	0.0234528	2.39164
30	63.7701	94855.7	1.02724	0.140296	1.3187	7.95421	2.69264	0.411197	2.34763	0.871868	2220.39	86.4317		2225.85	47.6121	2230.85	44.7438		2230.85	44.7438	2230.85	44.7438	2230.85	44.7438	0.468711	4.35844
50	60.0192	84937.9	1.44158	0.142001	2.87948	8.30974	5.23079	0.424419	4.36689	0.834844	2280.51	164.41		2265.38	92.9863	2251.74	97.4997		2251.74	97.4997	2251.74	97.4997	2251.74	97.4997	-1.27779	8.51718
52	152.105	182370	1.26517	0.146716	0.382456	8.75853	1.61113	0.432964	1.56508	0.971416	2319.07	59.7489		2313.19	28.7802	2307.98	12.8663		2307.98	12.8663	2307.98	12.8663	2307.98	12.8663	-0.480195	2.6487
47	161.725	246403	22.5697	0.148076	1.53667	9.21809	3.64884	0.451498	3.30949	0.906996	2401.91	130.074		2359.91	65.5344	2323.81	51.6216		2323.81	51.6216	2323.81	51.6216	2323.81	51.6216	-3.3608	6.05006
100	134.123	128746	0.625873	0.150503	0.408902	9.3023	1.36984	0.448273	1.30739	0.954409	2387.57	51.1296		2368.25	24.6169	2351.64	13.6984		2351.64	13.6984	2351.64	13.6984	2351.64	13.6984	-1.52792	2.25321
2	67.8222	54934.8	0.878014	0.151451	0.312361	9.58542	1.86015	0.459026	1.83374	0.9858	2435.25	72.8939		2395.77	33.5258	2362.36	10.4524		2362.36	10.4524	2362.36	10.4524	2362.36	10.4524	-3.0856	3.11916
31	116.021	153496	1.65447	0.153632	0.449614	9.77739	1.7161	0.461571	1.65615	0.965068	2446.49	66.0841		2414.02	30.9865	2386.74	15.0022		2386.74	15.0022	2386.74	15.0022	2386.74	15.0022	-2.5036	2.84278
1	61.3734	43839.3	2.1067	0.169452	0.505386	11.4767	2.03281	0.491211	1.96898	0.968602	2575.91	81.9503		2562.69	37.2177	2552.23	16.5847		2552.23	16.5847	2552.23	16.5847	2552.23	16.5847	-0.927876	3.27722
3	18.2541	13137.7	1.07566	0.179799	1.88598	13.2812	3.73781	0.535733	3.22711	0.863371	2765.56	142.246		2699.85	69.2071	2651	61.324		2651	61.324	2651	61.324	2651	61.324	-4.3214	5.88343
39	93.6594	247701	1.09024	0.180613	0.540495	12.8576	1.24253	0.516309	1.11882	0.900433	2683.51	48.1346		2669.28	22.9448	2658.5	17.5625		2658.5	17.5625	2658.5	17.5625	2658.5	17.5625	-0.940898	1.92949
54	140.899	55981.9	1.99874	0.181151	0.445109	12.3829	1.58557	0.49577	1.52181	0.959788	2595.59	63.7314		2633.88	29.1994	2663.43	14.4562		2663.43	14.4562	2663.43	14.4562	2663.43	14.4562	2.547	2.4506
90	111.029	31988	1.39506	0.182905	0.453365	12.9125	4.28044	0.512016	4.25637	0.994375	2665.23	182.126		2673.29	79.1059	2679.38	14.7019		2679.38	14.7019	2679.38	14.7019	2679.38	14.7019	0.52802	6.81918
43	71.933	100684	0.606845	0.182957	0.722101	13.1705	1.1866	0.5221	0.941591	0.793519	2708.08	40.8083		2691.95	21.9496	2679.85	23.4094		2679.85	23.4094	2679.85	23.4094	2679.85	23.4094	-1.05356	1.76014
29	78.8505	114107	1.48023	0.183306	0.788111	13.4633	2.97854	0.53269	2.87238	0.964359	2752.78	126.139		2712.71	55.193	2683	25.5426		2683	25.5426	2683	25.5426	2683	25.5426	-2.60085	4.80183
36	28.9573	50890.8	0.423609	0.18531	1.55279	13.5589	2.77639	0.530667	2.30156	0.828976	2744.26	100.82		2719.4	51.4705	2700.97	50.2499		2700.97	50.2499	2700.97	50.2499	2700.97	50.2499	-1.60287	4.18407
32	117.015	180827	0.881298	0.18585	0.325565	13.831	1.75006	0.539747	1.71951	0.982544	2782.39	76.1595		2738.2	32.4833	2705.77	10.5317		2705.77	10.5317	2705.77	10.5317	2705.77	10.5317	-2.83177	2.84303
7	19.2742	14099	2.39242	0.188953	2.07363	14.0351	3.57276	0.538719	2.9094	0.81433	2778.08	128.705		2752.08	66.3987	2733.06	66.9107		2733.06	66.9107	2733.06	66.9107	2733.06	66.9107	-1.64741	5.32629
72	100.181	64037.7	1.98805	0.189261	0.463381	13.9478	1.23195	0.534494	1.14149	0.926565	2760.36	50.2371		2746.17	22.8785	2735.73	14.9415		2735.73	14.9415	2735.73	14.9415	2735.73	14.9415	-0.900257	1.91724
Rejected Analyses (>10% discordant; >5% reverse discordant; >10% 2σ uncertainty)
86	50.796	24873.6	1.31968	0.0726055	5.0149	1.67565	5.45306	0.167384	2.14164	0.392741	997.681	38.7992		999.334	67.9907	1002.94	199.645	x	1002.94	199.645	997.681	38.7992	997.681	38.7992	0.524592	20.1759			x
5	75.9591	28774.8	1.3587	0.0736291	3.55674	1.82141	4.20526	0.179414	2.24363	0.533529	1063.77	43.1239		1053.19	54.0415	1031.3	140.925	x	1031.3	140.925	1063.77	43.1239	1063.77	43.1239	-3.14899	14.7022			x
41	53.498	53495.3	860.603	0.0772098	3.85791	1.94647	4.33777	0.182841	1.98314	0.457179	1082.48	38.7326		1097.23	57.045	1126.59	150.691	x	1126.59	150.691	1082.48	38.7326	1082.48	38.7326	3.91604	13.3039			x
66	57.6901	53114.1	2.66107	0.0773331	3.75986	2.08742	4.09492	0.195768	1.62229	0.396172	1152.55	33.5583		1144.68	55.1133	1129.81	146.787	x	1129.81	146.787	1152.55	33.5583	1152.55	33.5583	-2.01221	13.5823			x
6	26.0966	8931.29	1.35438	0.0789615	5.93772	2.0443	6.87245	0.18777	3.46035	0.503511	1109.28	69.1183		1130.39	91.91	1171.19	230.549	x	1171.19	230.549	1109.28	69.1183	1109.28	69.1183	5.28562	19.5562			x
74	51.3155	29051.8	2.18414	0.0822183	3.27266	2.39876	3.78045	0.2116	1.89248	0.500596	1237.34	41.7603		1242.23	53.1127	1250.73	125.527	x	1250.73	125.527	1250.73	125.527	1237.34	41.7603	1.07092	10.4752			x
12	21.5001	14760.2	1.87703	0.112328	5.71464	5.31556	6.20707	0.34321	2.42295	0.390352	1902.1	78.224		1871.37	104.065	1837.4	203.017	x	1837.4	203.017	1837.4	203.017	1837.4	203.017	-3.52104	12.2048			x
53	50.0139	5480.67	0.698709	0.129932	4.89767	14.2744	86.4619	0.796786	86.3231	0.998394	3777.59	5096.14	x	2768.12	2231.51	2097.03	168.752		2097.03	168.752	2097.03	168.752	2097.03	168.752	-80.1402	243.449			x
15	17.8694	6085.91	1.13873	0.0639734	16.8381	1.48284	17.2829	0.168111	3.89564	0.225405	1001.69	70.8384		923.394	206.157	740.73	702.792	x	740.73	702.792	1001.69	70.8384	1001.69	70.8384	-35.2305	128.66			x
98	29.0868	15984.9	2.49684	0.0755501	12.2664	2.02286	12.451	0.194191	2.13588	0.171543	1144.04	43.8842		1123.22	166.205	1083.15	483.891	x	1083.15	483.891	1144.04	43.8842	1144.04	43.8842	-5.62101	47.359			x
48	14.5744	7323.88	3.48471	0.0879227	12.3171	3.02136	13.4918	0.24923	5.50612	0.408108	1434.5	138.802		1413.03	202.432	1380.78	465.653	x	1380.78	465.653	1380.78	465.653	1434.5	138.802	-3.89076	36.4497			x
28	15.1668	6960.21	1.52261	0.0824872	14.4283	2.37896	15.1068	0.20917	4.47651	0.296324	1224.4	97.8441		1236.3	212.475	1257.13	555.735	x	1257.13	555.735	1257.13	555.735	1224.4	97.8441	2.60373	43.7535			x
45	69.4547	10634.2	0.919965	0.151769	1.1586	6.53939	5.51719	0.312503	5.39417	0.977702	1753.01	162.284		2051.22	95.3096	2365.93	38.7513		2365.93	38.7513	2365.93	38.7513	2365.93	38.7513	25.9061	6.96573	x		x
J1122-118, Slats Creek Fm, Hart River inlier (Cambrian), University of Arizona, n=61/101
53	122.048	23916.8	2.53056	0.07264	1.98545	1.47679	2.60219	0.147449	1.68208	0.646409	886.647	27.3105		920.914	30.8809	1003.91	78.9518		886.647	27.3105	886.647	27.3105	886.647	27.3105	11.6803	7.45962
45	113.536	40247	4.27971	0.0736354	1.98346	1.77924	2.76579	0.175245	1.92756	0.696929	1040.95	36.3162		1037.9	35.2418	1031.47	78.597		1031.47	78.597	1040.95	36.3162	1040.95	36.3162	-0.918513	8.45755
22	291.325	120798	2.11343	0.075404	0.584642	1.85872	1.11403	0.17878	0.948286	0.851225	1060.3	18.1719		1066.53	14.4155	1079.29	22.9569		1079.29	22.9569	1060.3	18.1719	1060.3	18.1719	1.7594	2.68351
72	224.39	94294.2	1.48051	0.0757635	0.973142	1.89502	2.85256	0.181407	2.68144	0.94001	1074.65	52.0234		1079.34	37.165	1088.82	38.1845		1088.82	38.1845	1074.65	52.0234	1074.65	52.0234	1.30122	5.89996
8	130.592	96438.6	3.00984	0.0753624	0.958474	1.89035	3.03345	0.181923	2.87804	0.94877	1077.47	55.9722		1077.71	39.4886	1078.18	37.6902		1078.18	37.6902	1077.47	55.9722	1077.47	55.9722	0.0657728	6.25733
34	113.623	72602.4	2.45324	0.0763874	1.90961	1.93449	2.10637	0.183672	0.888924	0.422017	1087.01	17.4282		1093.1	27.6365	1105.26	74.8063		1105.26	74.8063	1087.01	17.4282	1087.01	17.4282	1.65154	6.84065
13	103.051	40719.6	2.0382	0.0764658	1.82029	1.93872	2.25586	0.183885	1.33246	0.590665	1088.16	26.1496		1094.56	29.6202	1107.28	71.2766		1107.28	71.2766	1088.16	26.1496	1088.16	26.1496	1.7261	6.75244
20	49.1847	32888.3	1.34135	0.0761947	2.21864	1.93583	2.83533	0.184265	1.76541	0.62265	1090.23	34.7068		1093.56	37.2114	1100.21	86.9629		1100.21	86.9629	1090.23	34.7068	1090.23	34.7068	0.907004	8.44392
68	180.432	87327.4	1.47195	0.0753858	1.13438	1.95088	1.6104	0.187689	1.14305	0.709794	1108.85	22.8233		1098.75	21.1893	1078.79	44.6206		1078.79	44.6206	1108.85	22.8233	1108.85	22.8233	-2.78554	4.74868
55	210.04	316933	3.28985	0.0789559	1.34904	2.1294	2.05974	0.195601	1.55648	0.755666	1151.64	32.1738		1158.39	27.8948	1171.05	52.3827		1171.05	52.3827	1151.64	32.1738	1151.64	32.1738	1.65688	5.18651
65	233.709	155080	1.9347	0.0795415	1.12797	2.18885	1.56327	0.199582	1.08237	0.692371	1173.08	22.7531		1177.5	21.356	1185.66	43.7127		1185.66	43.7127	1173.08	22.7531	1173.08	22.7531	1.06145	4.12165
58	140.223	57071.6	1.85287	0.0786981	1.12658	2.17667	1.42578	0.200598	0.873882	0.612915	1178.53	18.4483		1173.61	19.4434	1164.53	43.7779		1164.53	43.7779	1178.53	18.4483	1178.53	18.4483	-1.20205	4.1211
84	85.6935	34457.6	2.86054	0.0785192	2.11731	2.18534	2.58224	0.201856	1.47817	0.572438	1185.28	31.3683		1176.38	35.2608	1160.02	82.2749		1160.02	82.2749	1185.28	31.3683	1185.28	31.3683	-2.17766	7.73504
90	182.096	17895.2	1.7055	0.083105	0.961728	2.3747	2.10793	0.207244	1.87576	0.889856	1214.12	40.6854		1235.02	29.5222	1271.7	36.7806		1271.7	36.7806	1271.7	36.7806	1214.12	40.6854	4.52834	4.22611
94	314.911	286090	2.53621	0.0823633	0.539331	2.41197	0.816395	0.212391	0.612881	0.750716	1241.55	13.5658		1246.17	11.4857	1254.15	20.6688		1254.15	20.6688	1254.15	20.6688	1241.55	13.5658	1.00519	1.95747
38	75.4561	48295.1	1.26729	0.0835309	3.04737	2.48586	4.46872	0.215838	3.26848	0.731414	1259.85	73.3124		1267.92	63.4429	1281.63	116.402		1281.63	116.402	1281.63	116.402	1259.85	73.3124	1.69991	10.6033
80	124.076	126388	2.0445	0.0851772	1.18784	2.59483	1.80534	0.220945	1.35952	0.753055	1286.87	31.0849		1299.18	25.9358	1319.56	45.12		1319.56	45.12	1319.56	45.12	1286.87	31.0849	2.47745	4.08277
71	101.459	46395.4	2.43068	0.085533	1.71018	2.62715	2.33684	0.222766	1.59251	0.681482	1296.48	36.6576		1308.27	33.688	1327.63	64.8927		1327.63	64.8927	1327.63	64.8927	1296.48	36.6576	2.34662	5.51425
26	78.5107	51904.4	2.13357	0.0850419	1.81483	2.61558	2.93789	0.223066	2.31032	0.786388	1298.06	53.2394		1305.02	42.3036	1316.47	68.9717		1316.47	68.9717	1316.47	68.9717	1298.06	53.2394	1.3991	6.56052
49	66.8581	43772	2.36421	0.0862092	2.02631	2.66615	4.05439	0.2243	3.51171	0.866151	1304.56	81.2907		1319.13	58.6964	1342.86	76.7289		1342.86	76.7289	1342.86	76.7289	1304.56	81.2907	2.8523	8.21327
29	118.763	45872.3	2.50688	0.0861805	1.5973	2.67662	1.74252	0.225256	0.696421	0.399664	1309.59	16.1769		1322.02	25.2478	1342.21	60.4856		1342.21	60.4856	1342.21	60.4856	1309.59	16.1769	2.4309	4.55905
97	131.967	56736	2.75521	0.0845985	1.43143	2.62836	1.47677	0.225331	0.363118	0.245887	1309.98	8.43703		1308.61	21.2907	1306.33	54.4781		1306.33	54.4781	1306.33	54.4781	1309.98	8.43703	-0.279414	4.23154
18	82.061	43639.5	1.76404	0.0863281	1.51971	2.68394	1.8775	0.225486	1.10248	0.587209	1310.8	25.6306		1324.04	27.224	1345.52	57.5223		1345.52	57.5223	1345.52	57.5223	1310.8	25.6306	2.58071	4.57972
75	263.835	174885	2.31402	0.0862257	0.64989	2.71958	1.08127	0.228752	0.864167	0.799216	1327.95	20.327		1333.82	15.7339	1343.23	24.6038		1343.23	24.6038	1343.23	24.6038	1327.95	20.327	1.13721	2.35993
66	217.862	152003	2.05372	0.0853119	1.10619	2.70449	1.73388	0.229919	1.33517	0.770051	1334.07	31.5363		1329.69	25.1933	1322.62	42.0029		1322.62	42.0029	1322.62	42.0029	1334.07	31.5363	-0.865874	3.99324
67	172.509	161954	2.12208	0.0872158	0.810577	2.81884	1.19796	0.234408	0.88209	0.736324	1357.56	21.1642		1360.56	17.5987	1365.25	30.5949		1365.25	30.5949	1365.25	30.5949	1357.56	21.1642	0.563059	2.71454
32	52.7242	23233.1	0.831669	0.0902198	3.20506	2.93955	3.35774	0.236307	1.00101	0.298121	1367.47	24.1749		1392.16	49.8721	1430.17	119.927		1430.17	119.927	1430.17	119.927	1367.47	24.1749	4.38397	8.19412
17	86.4487	77589	2.86576	0.0892726	1.33461	2.91034	1.90623	0.236442	1.36108	0.714015	1368.17	32.8859		1384.6	28.2371	1410	50.0649		1410	50.0649	1410	50.0649	1368.17	32.8859	2.96607	4.1606
43	110.137	53969	2.72968	0.0872221	1.64074	2.86143	2.0078	0.237933	1.15725	0.576376	1375.94	28.1034		1371.82	29.6124	1365.39	61.9305		1365.39	61.9305	1365.39	61.9305	1375.94	28.1034	-0.773151	5.01287
23	70.9254	27929.3	2.63231	0.0873119	2.31329	2.87302	2.40155	0.238651	0.645055	0.2686	1379.68	15.7031		1374.86	35.4578	1367.37	87.2981		1367.37	87.2981	1367.37	87.2981	1379.68	15.7031	-0.900209	6.54341
50	120.974	94262.8	1.95378	0.0878129	0.997175	2.89824	1.09579	0.239372	0.45432	0.414604	1383.43	11.0869		1381.45	16.214	1378.38	37.5703		1378.38	37.5703	1378.38	37.5703	1383.43	11.0869	-0.366847	2.85148
39	51.9927	94045.4	2.33555	0.0883058	2.47881	2.98288	2.78336	0.244988	1.26592	0.454818	1412.58	31.4746		1403.26	41.4912	1389.13	93.2666		1389.13	93.2666	1389.13	93.2666	1412.58	31.4746	-1.68793	7.19352
88	110.875	114007	2.54618	0.0915934	0.834565	3.10353	1.31739	0.245748	1.01932	0.773744	1416.51	25.4066		1433.57	19.8296	1458.95	31.0994		1458.95	31.0994	1458.95	31.0994	1416.51	25.4066	2.90883	2.70479
15	151.254	206704	2.5949	0.0903831	0.811114	3.08042	1.72211	0.247185	1.51913	0.882133	1423.94	38.0418		1427.83	25.8747	1433.62	30.329		1433.62	30.329	1433.62	30.329	1423.94	38.0418	0.675048	3.38477
52	74.7372	45354.7	2.30312	0.0879512	1.41264	3.00158	2.06806	0.247518	1.5104	0.730348	1425.66	37.8641		1408.02	30.8746	1381.4	53.2016		1381.4	53.2016	1381.4	53.2016	1425.66	37.8641	-3.20416	4.82816
2	52.7282	26283	3.44766	0.091424	2.33114	3.12223	2.73425	0.247687	1.42895	0.522612	1426.54	35.8418		1438.18	41.221	1455.43	86.9192		1455.43	86.9192	1455.43	86.9192	1426.54	35.8418	1.98528	6.35042
99	338.351	177378	1.70565	0.0914816	0.436271	3.1486	0.891705	0.249622	0.777692	0.872141	1436.53	19.6285		1444.66	13.4688	1456.63	16.2622		1456.63	16.2622	1456.63	16.2622	1436.53	19.6285	1.38019	1.74013
87	76.7769	116192	0.804478	0.0919673	2.16455	3.19989	3.11764	0.252348	2.24375	0.719695	1450.58	57.1251		1457.13	47.2815	1466.69	80.5841		1466.69	80.5841	1466.69	80.5841	1450.58	57.1251	1.09893	6.68557
74	76.5988	54204.2	1.56636	0.0921555	1.13812	3.21307	1.4125	0.25287	0.836567	0.59226	1453.26	21.3338		1460.32	21.4394	1470.58	42.3454		1470.58	42.3454	1470.58	42.3454	1453.26	21.3338	1.17734	3.19407
1	31.1247	20852.5	2.15022	0.0901485	2.07393	3.14393	2.60497	0.252937	1.57628	0.605106	1453.61	40.2062		1443.51	39.3373	1428.66	77.6068		1428.66	77.6068	1428.66	77.6068	1453.61	40.2062	-1.74613	6.20223
4	45.0607	100521	3.52212	0.0912747	2.13213	3.1856	2.48668	0.253127	1.27967	0.514611	1454.58	32.6601		1453.67	37.6696	1452.32	79.5307		1452.32	79.5307	1452.32	79.5307	1454.58	32.6601	-0.155706	5.92776
81	150.67	166630	3.12043	0.0923712	0.799072	3.30135	1.40229	0.259211	1.15234	0.821759	1485.8	29.9717		1481.37	21.4203	1475.01	29.7125		1475.01	29.7125	1475.01	29.7125	1485.8	29.9717	-0.731831	2.87163
61	97.8781	52893.3	1.42694	0.0994335	1.37467	3.90607	2.99394	0.284909	2.65969	0.888358	1616.04	74.5149		1614.94	47.4479	1613.49	50.1897		1613.49	50.1897	1613.49	50.1897	1613.49	50.1897	-0.157675	5.57087
30	62.9765	28599.1	1.16991	0.0998586	1.22891	3.97691	1.43643	0.288841	0.743722	0.517756	1635.74	21.0594		1629.5	22.8442	1621.43	44.821		1621.43	44.821	1621.43	44.821	1621.43	44.821	-0.882207	3.07629
3	118.117	68198.1	2.74451	0.0999104	0.35258	3.92275	1.35781	0.28476	1.31123	0.965698	1615.29	36.7207		1618.39	21.5339	1622.4	12.855		1622.4	12.855	1622.4	12.855	1622.4	12.855	0.438122	2.3969
96	181.706	194690	1.87602	0.100161	0.867621	3.88594	1.04054	0.281383	0.574414	0.552036	1598.32	15.9374		1610.77	16.4703	1627.05	31.6195		1627.05	31.6195	1627.05	31.6195	1627.05	31.6195	1.76551	2.14569
42	53.9712	27345.3	1.33304	0.100375	1.27594	3.85006	2.57781	0.278189	2.23988	0.86891	1582.23	61.5954		1603.28	40.7303	1631.03	46.479		1631.03	46.479	1631.03	46.479	1631.03	46.479	2.99169	4.68014
98	66.7625	31483.3	0.932831	0.100445	1.25157	3.91985	1.61248	0.283035	1.01669	0.630512	1606.63	28.3377		1617.79	25.5694	1632.32	45.5837		1632.32	45.5837	1632.32	45.5837	1632.32	45.5837	1.57352	3.25097
12	178.642	400591	4.01247	0.10091	0.649113	4.00085	1.7433	0.287552	1.61794	0.928093	1629.29	45.6553		1634.37	27.7584	1640.9	23.6164		1640.9	23.6164	1640.9	23.6164	1640.9	23.6164	0.70779	3.12787
86	108.628	119840	0.836324	0.101032	0.491719	3.94605	1.65505	0.28327	1.58032	0.954846	1607.81	44.076		1623.18	26.2801	1643.15	17.8847		1643.15	17.8847	1643.15	17.8847	1643.15	17.8847	2.15083	2.88611
62	271.971	119395	0.971189	0.101546	0.329039	4.23827	5.71694	0.302708	5.70747	0.998342	1704.72	167.579		1681.47	92.1214	1652.55	11.9533		1652.55	11.9533	1652.55	11.9533	1652.55	11.9533	-3.15709	10.168
76	65.4698	42821.5	1.89181	0.102255	0.904233	3.99255	2.70426	0.28318	2.5486	0.94244	1607.36	71.065		1632.68	43.0457	1665.44	32.7921		1665.44	32.7921	1665.44	32.7921	1665.44	32.7921	3.48748	4.67106
54	74.3522	60409.8	2.27788	0.103564	1.1989	4.37302	1.60977	0.306245	1.07424	0.667325	1722.2	31.8215		1707.26	26.0758	1688.94	43.3503		1688.94	43.3503	1688.94	43.3503	1688.94	43.3503	-1.96931	3.22489
36	121.574	300683	3.28588	0.106593	0.900325	4.50623	3.17378	0.306608	3.0434	0.95892	1723.99	90.2359		1732.12	51.7034	1741.94	32.3365		1741.94	32.3365	1741.94	32.3365	1741.94	32.3365	1.02999	5.49636
85	100.473	65361.1	3.65374	0.106846	0.602888	4.54432	1.09715	0.308468	0.916664	0.835493	1733.16	27.3043		1739.12	17.8972	1746.28	21.6405		1746.28	21.6405	1746.28	21.6405	1746.28	21.6405	0.751254	1.98934
44	79.8756	90213.3	3.65409	0.10858	1.29413	4.68086	3.08593	0.312661	2.80146	0.907818	1753.79	84.3115		1763.82	50.6148	1775.72	46.2883		1775.72	46.2883	1775.72	46.2883	1775.72	46.2883	1.2349	5.40112
6	50.9383	41191.8	0.815535	0.11354	1.30425	5.16942	2.47664	0.33021	2.1054	0.850102	1839.4	66.0363		1847.6	41.3056	1856.82	46.1899		1856.82	46.1899	1856.82	46.1899	1856.82	46.1899	0.938059	4.32674
83	33.5175	30427.5	1.89374	0.115941	1.79003	5.4421	2.00738	0.340429	0.908503	0.452581	1888.73	29.1531		1891.51	33.7518	1894.54	63.1108		1894.54	63.1108	1894.54	63.1108	1894.54	63.1108	0.306507	3.66016
10	25.6487	22542.7	0.904118	0.127218	2.7315	6.64766	4.57796	0.378982	3.67377	0.802492	2071.53	127.574		2065.7	79.2369	2059.87	94.4723		2059.87	94.4723	2059.87	94.4723	2059.87	94.4723	-0.566062	7.72206
73	162.474	226262	1.93007	0.18509	0.205509	13.1441	0.614955	0.515044	0.5796	0.942507	2678.13	24.8956		2690.05	11.3734	2699	6.65227		2699	6.65227	2699	6.65227	2699	6.65227	0.773569	0.954269
57	49.0527	53588.8	1.52958	0.194374	0.579667	14.4507	2.34386	0.539199	2.27105	0.968936	2780.09	100.523		2779.77	43.6344	2779.52	18.6174		2779.52	18.6174	2779.52	18.6174	2779.52	18.6174	-0.020554	3.67808
Rejected Analyses (>10% discordant; >5% reverse discordant; >10% 2σ uncertainty)
89	206.203	43925.7	1.77917	0.0575451	2.90628	0.640587	3.31683	0.0807362	1.59839	0.481904	500.516	15.0871		502.67	25.7758	512.5	125.236	x	500.516	15.0871	500.516	15.0871	500.516	15.0871	2.33834	24.0457			x
91	90.0887	52580.4	1.76279	0.07113	2.93946	1.59211	3.06386	0.162338	0.864197	0.282061	969.754	15.2502		967.124	37.4564	961.171	117.726	x	961.171	117.726	969.754	15.2502	969.754	15.2502	-0.893028	12.4591			x
78	33.166	13726.5	2.41969	0.072871	9.69592	1.59157	9.84297	0.158405	1.69506	0.17221	947.906	29.2866		966.911	120.449	1010.35	386.159	x	1010.35	386.159	947.906	29.2866	947.906	29.2866	6.1804	35.9751			x
25	44.44	16911.9	1.90976	0.0731193	3.49734	1.80322	4.34657	0.178861	2.58094	0.593789	1060.75	49.4775		1046.62	55.6592	1017.24	138.893	x	1017.24	138.893	1060.75	49.4775	1060.75	49.4775	-4.2766	15.0457			x
77	58.7206	23346.5	1.60619	0.0745527	3.10323	1.84034	3.38748	0.179033	1.35829	0.400974	1061.69	26.06		1059.98	43.6878	1056.48	122.506	x	1056.48	122.506	1061.69	26.06	1061.69	26.06	-0.492561	11.9109			x
33	65.3901	27963	3.34203	0.0748476	4.67091	1.7885	4.93106	0.173304	1.5805	0.32052	1030.29	29.4964		1041.28	62.9636	1064.43	184.217	x	1064.43	184.217	1030.29	29.4964	1030.29	29.4964	3.2074	16.9792			x
79	75.0949	46386.6	1.67998	0.0748501	3.49132	1.8363	3.57621	0.177931	0.77459	0.216595	1055.66	14.7835		1058.54	46.087	1064.5	137.644	x	1064.5	137.644	1055.66	14.7835	1055.66	14.7835	0.830108	12.8981			x
51	39.6015	16613.2	1.61819	0.0755932	6.87932	1.97533	7.47099	0.18952	2.91386	0.390023	1118.77	58.6582		1107.13	98.7927	1084.34	270.66	x	1084.34	270.66	1118.77	58.6582	1118.77	58.6582	-3.17599	26.3156			x
5	28.7469	12698.5	1.47241	0.0756676	6.08092	1.9945	7.32985	0.191172	4.09257	0.558343	1127.72	82.99		1113.65	97.2381	1086.31	239.113	x	1086.31	239.113	1127.72	82.99	1127.72	82.99	-3.81192	24.0938			x
69	59.1114	41591	1.78872	0.075909	3.26068	1.92898	3.40439	0.184303	0.978697	0.287481	1090.44	19.2439		1091.18	44.6282	1092.65	128.023	x	1092.65	128.023	1090.44	19.2439	1090.44	19.2439	0.202556	11.8248			x
95	51.9671	61284.9	3.91198	0.0769494	3.80276	2.01388	5.64388	0.189813	4.17042	0.738927	1120.36	84.0635		1120.2	75.0892	1119.9	148.682	x	1119.9	148.682	1120.36	84.0635	1120.36	84.0635	-0.0414108	15.2562			x
63	54.4046	21310.9	2.37544	0.077297	3.32971	2.14095	3.65738	0.200882	1.5131	0.41371	1180.06	31.9804		1162.13	49.624	1128.85	129.997	x	1128.85	129.997	1180.06	31.9804	1180.06	31.9804	-4.53672	12.3672			x
35	71.0318	14972	0.83884	0.0778099	6.28045	1.87267	6.46144	0.174552	1.51862	0.235028	1037.14	28.5153		1071.47	83.8779	1142.01	244.961	x	1142.01	244.961	1037.14	28.5153	1037.14	28.5153	9.18279	19.6396			x
21	121.882	24604.5	1.25732	0.079776	3.22797	2.15879	5.45871	0.196262	4.40201	0.80642	1155.21	91.2521		1167.88	74.2792	1191.47	124.909	x	1191.47	124.909	1155.21	91.2521	1155.21	91.2521	3.0433	12.727			x
82	64.7029	34799.4	1.90276	0.0809878	3.57537	2.30565	4.2656	0.206477	2.32638	0.545382	1210.02	50.3049		1214.02	59.2285	1221.16	137.769	x	1221.16	137.769	1221.16	137.769	1210.02	50.3049	0.912101	11.9137			x
7	30.1387	19728	2.56317	0.0902049	6.45352	3.08425	6.78801	0.247981	2.10454	0.310038	1428.06	52.8378		1428.78	102.105	1429.85	241.679	x	1429.85	241.679	1429.85	241.679	1428.06	52.8378	0.12569	17.2809			x
9	24.2492	17210.4	1.32015	0.102326	4.80432	3.98209	5.84434	0.282242	3.32788	0.56942	1602.65	92.5555		1630.55	93.033	1666.73	174.304	x	1666.73	174.304	1666.73	174.304	1666.73	174.304	3.84464	11.4872			x
59	363.013	160146	1.08099	0.0567557	2.15896	0.648035	2.3157	0.0828108	0.837462	0.361646	512.879	8.09234		507.269	18.1222	482.076	93.5214	x	512.879	8.09234	512.879	8.09234	512.879	8.09234	-6.38964	20.7075			x
28	339.169	129827	2.0222	0.0907497	3.85932	3.76071	19.7916	0.300554	19.4117	0.980804	1694.06	567.183	x	1584.4	313.719	1441.34	144.206	x	1441.34	144.206	1441.34	144.206	1441.34	144.206	-17.5337	41.0706			x
77	20.8922	7660.48	2.78523	0.0670389	9.91228	1.46018	11.0086	0.157971	4.7891	0.435033	945.494	82.5496		914.083	130.22	838.962	405.481	x	838.962	405.481	945.494	82.5496	945.494	82.5496	-12.6981	55.35			x
41	20.6551	12900.4	1.47226	0.079749	6.01229	2.51633	6.44048	0.228845	2.30916	0.358538	1328.44	54.3343		1276.76	91.7889	1190.77	232.784	x	1190.77	232.784	1190.77	232.784	1328.44	54.3343	-11.5617	22.2815			x
31	23.261	9882.22	1.28325	0.0725382	8.12201	1.79632	8.58496	0.179604	2.7811	0.32395	1064.81	53.5023		1044.12	109.866	1001.06	323.783	x	1001.06	323.783	1064.81	53.5023	1064.81	53.5023	-6.36834	34.8165			x
11	58.9521	24203.4	1.88856	0.0695077	3.5389	1.55957	3.94766	0.162731	1.74934	0.443134	971.937	30.9344		954.297	47.8793	913.825	142.772	x	913.825	142.772	971.937	30.9344	971.937	30.9344	-6.35919	16.9584			x
56	101.631	4822.83	1.06624	0.0777295	7.89994	1.98562	27.9762	0.185272	26.8376	0.959302	1095.71	530.353	x	1110.64	374.649	1139.96	308.375	x	1139.96	308.375	1095.71	530.353	1095.71	530.353	3.88123	53.2969			x
14	21.5474	6910.03	1.8124	0.0843135	8.31295	2.48314	9.08236	0.213601	3.65844	0.402807	1247.97	81.3586		1267.13	129.04	1299.78	317.188	x	1299.78	317.188	1299.78	317.188	1247.97	81.3586	3.98587	24.2522			x
27	79.3476	28448.9	1.85515	0.0763324	6.25925	1.74524	8.83664	0.165823	6.23763	0.705883	989.056	112.103	x	1025.4	111.919	1103.78	245.515	x	1103.78	245.515	989.056	112.103	989.056	112.103	10.394	22.3696			x
100	266.973	20936.6	1.63523	0.0800807	0.601378	1.91557	1.06123	0.173488	0.874386	0.823937	1031.3	16.3331		1086.53	13.8764	1199	23.2173		1199	23.2173	1031.3	16.3331	1031.3	16.3331	13.9864	2.15169	x		x
92	112.394	52085.9	1.54706	0.0810344	1.26212	1.9777	7.16607	0.177007	7.05405	0.984368	1050.6	134.042	x	1107.94	94.7927	1222.26	48.6044		1222.26	48.6044	1050.6	134.042	1050.6	134.042	14.0443	11.487			x
47	108.528	260762	2.76488	0.195101	0.729644	11.4704	8.25035	0.426401	8.21803	0.996082	2289.47	310.46	x	2562.17	151.319	2785.63	23.4234		2785.63	23.4234	2785.63	23.4234	2785.63	23.4234	17.8114	11.1665			x
64	294.598	6152.39	2.67009	0.0752397	1.3505	1.50502	3.43622	0.145075	3.1597	0.91953	873.299	50.5805		932.423	41.0922	1074.93	53.1528		873.299	50.5805	873.299	50.5805	873.299	50.5805	18.7578	6.18704	x		x
46	104.921	8315.29	1.12363	0.0995189	1.40748	2.99099	2.96699	0.217976	2.6119	0.88032	1271.17	59.0614		1405.33	44.2596	1615.09	51.377		1615.09	51.377	1615.09	51.377	1271.17	59.0614	21.2942	4.43181	x		x
70	219.441	32867.7	0.663912	0.0963402	0.661839	2.77091	4.85326	0.208599	4.80792	0.990658	1221.35	104.851		1347.73	71.0036	1554.4	24.3515		1554.4	24.3515	1554.4	24.3515	1221.35	104.851	21.4261	6.85683	x		x
16	211.249	14928.9	2.63753	0.0870493	1.12347	2.08624	1.72298	0.173819	1.30632	0.758176	1033.12	24.4412		1144.29	23.1804	1361.57	42.4284		1361.57	42.4284	1033.12	24.4412	1033.12	24.4412	24.1227	2.96865	x		x
40	133.705	14277.7	2.24636	0.0848996	1.87559	1.79829	8.47962	0.153622	8.26959	0.975231	921.236	139.145	x	1044.84	108.558	1313.23	71.3151		1313.23	71.3151	921.236	139.145	921.236	139.145	29.8495	11.2596	x		x
24	386.701	8250.51	2.01335	0.0818358	1.48651	1.60594	46.6679	0.142326	46.6442	0.999493	857.804	735.117	x	972.528	588.973	1241.57	57.0878		857.804	735.117	857.804	735.117	857.804	735.117	30.9098	59.2938			x
37	177.238	2277.65	1.469	0.081197	4.70929	1.51419	6.70357	0.135251	4.77078	0.711678	817.751	71.8152		936.134	80.3916	1226.2	181.371	x	817.751	71.8152	817.751	71.8152	817.751	71.8152	33.3101	11.472	x		x
93	166.545	67805.2	2.38924	0.0854141	2.28351	1.71919	49.5633	0.14598	49.5106	0.998938	878.388	797.931	x	1015.72	645.341	1324.94	86.6874		878.388	797.931	878.388	797.931	878.388	797.931	33.7035	60.38			x
60	164.044	3783.51	1.74424	0.0872746	1.15085	1.7871	8.09486	0.148511	8.01263	0.989842	892.613	130.915	x	1040.77	103.391	1366.55	43.43		892.613	130.915	892.613	130.915	892.613	130.915	34.6811	9.80231	x		x
19	63.7752	33987.1	2.95298	0.0821601	3.75858	1.26056	30.5369	0.111276	30.3047	0.992396	680.156	383.53	x	828.161	342.224	1249.32	144.212	x	680.156	383.53	680.156	383.53	680.156	383.53	45.5578	31.3358	x		x
48	247.36	1308.93	1.45366	0.0872682	2.12786	1.38721	10.525	0.115288	10.3077	0.97935	703.386	134.632	x	883.51	121.872	1366.4	80.31		703.386	134.632	703.386	134.632	703.386	134.632	48.5228	10.3071	x		x
J1212, Illtyd Fm, Illtyd Range (Cambrian), University of Arizona, n=91/125
105	28.8035	1382.62	1.20228	0.0733577	0.988004	1.72306	3.85301	0.170354	3.72419	0.966565	1014.06	68.493		1017.17	48.5306	1023.83	39.1857		1023.83	39.1857	1014.06	68.493	1014.06	68.493	0.954193	7.68925
106	145.434	7419.86	3.6854	0.0742511	0.653074	1.80432	2.36193	0.176242	2.26985	0.961014	1046.41	42.972		1047.02	30.2463	1048.32	25.8442		1048.32	25.8442	1046.41	42.972	1046.41	42.972	0.181668	4.78107
89	284.654	20402.1	2.29957	0.0782747	1.1461	1.9318	1.82802	0.178994	1.42412	0.779049	1061.48	27.3179		1092.16	23.9726	1153.83	44.5844		1153.83	44.5844	1061.48	27.3179	1061.48	27.3179	8.00436	4.27101
121	24.9585	1236.96	0.945265	0.0729422	1.00014	1.80084	1.88145	0.179058	1.5936	0.847008	1061.83	30.5783		1045.76	24.0761	1012.33	39.6996		1012.33	39.6996	1061.83	30.5783	1061.83	30.5783	-4.88964	5.10331
42	168.738	58055	3.70332	0.0746714	2.39672	1.90526	2.70593	0.185054	1.2561	0.464203	1094.53	24.7834		1082.93	35.3198	1059.69	94.5566		1059.69	94.5566	1094.53	24.7834	1094.53	24.7834	-3.28764	9.50852
114	182.467	9243.94	2.66176	0.0765838	0.620624	2.00661	1.36381	0.190031	1.21441	0.890457	1121.54	24.5024		1117.75	18.115	1110.35	24.3339		1110.35	24.3339	1121.54	24.5024	1121.54	24.5024	-1.00775	3.12566
120	82.006	4038.91	2.43854	0.0779601	0.762459	2.05105	1.7561	0.190811	1.58194	0.900828	1125.77	32.0278		1132.65	23.4954	1145.88	29.6937		1145.88	29.6937	1125.77	32.0278	1125.77	32.0278	1.75481	3.78072
33	122.632	51433.5	2.09686	0.0782063	2.04286	2.06461	2.4466	0.191468	1.34632	0.550281	1129.32	27.3361		1137.15	32.8059	1152.1	79.5302		1152.1	79.5302	1129.32	27.3361	1129.32	27.3361	1.97696	7.17054
16	384.947	9997.18	2.82212	0.0795861	0.804339	2.10222	1.27811	0.191576	0.993278	0.777147	1129.9	20.1773		1149.53	17.2373	1186.77	31.1237		1186.77	31.1237	1129.9	20.1773	1129.9	20.1773	4.79155	3.02079
38	395.605	89347.4	2.33282	0.076932	0.641333	2.03921	1.04791	0.192244	0.828743	0.790851	1133.52	16.8843		1128.7	13.9933	1119.45	25.0899		1119.45	25.0899	1133.52	16.8843	1133.52	16.8843	-1.25746	2.72495
68	194.274	94709.7	2.81586	0.0776789	0.699357	2.07189	1.84616	0.193447	1.70857	0.925472	1140.02	34.9919		1139.56	24.7822	1138.69	27.2475		1138.69	27.2475	1140.02	34.9919	1140.02	34.9919	-0.116868	3.89648
91	83.2153	18016.7	2.58811	0.0763874	1.87934	2.08303	2.85564	0.197776	2.15006	0.752918	1163.36	44.8565		1143.23	38.4027	1105.26	73.6264		1105.26	73.6264	1163.36	44.8565	1163.36	44.8565	-5.25683	8.1015
49	220.254	69247.4	3.05737	0.0780159	1.62162	2.13732	1.83289	0.198695	0.854298	0.466094	1168.3	17.8921		1160.96	24.8517	1147.26	63.1812		1147.26	63.1812	1168.3	17.8921	1168.3	17.8921	-1.83424	5.82095
62	252.377	83917.5	3.07783	0.0796742	1.00666	2.19723	1.15656	0.200012	0.56944	0.492356	1175.38	11.992		1180.16	15.8185	1188.96	38.9969		1188.96	38.9969	1175.38	11.992	1175.38	11.992	1.1415	3.39574
92	136.61	62136.7	3.37374	0.0786385	1.62773	2.1727	2.25377	0.200384	1.55885	0.691661	1177.38	32.8792		1172.34	30.7186	1163.03	63.237		1163.03	63.237	1177.38	32.8792	1177.38	32.8792	-1.23411	6.1879
83	324.967	120685	3.74344	0.078173	0.710925	2.17185	2.63573	0.201498	2.53804	0.962937	1183.37	53.7805		1172.07	35.9212	1151.28	27.6267		1151.28	27.6267	1183.37	53.7805	1183.37	53.7805	-2.78698	5.28256
119	181.461	10629.8	3.40755	0.0797953	0.652027	2.22352	1.95468	0.202099	1.84272	0.942724	1186.58	39.1435		1188.48	26.8348	1191.95	25.1887		1191.95	25.1887	1186.58	39.1435	1186.58	39.1435	0.450006	3.90003
54	118.181	98599	1.59493	0.0802905	1.39032	2.25447	1.79018	0.203647	1.12773	0.629953	1194.88	24.1079		1198.18	24.6814	1204.12	53.6901		1204.12	53.6901	1194.88	24.1079	1194.88	24.1079	0.766682	4.85659
81	128.988	19394.4	2.03317	0.090877	1.61383	2.55342	5.40495	0.203783	5.15839	0.954384	1195.61	110.336		1287.41	77.3342	1444.01	60.262		1444.01	60.262	1195.61	110.336	1195.61	110.336	17.202	8.38595
35	350.445	99903.7	2.47056	0.0816126	1.05556	2.40267	1.52548	0.213518	1.1013	0.72194	1247.53	24.4833		1243.4	21.4379	1236.25	40.5742		1236.25	40.5742	1236.25	40.5742	1247.53	24.4833	-0.912518	3.85893
88	257.408	22042.5	2.65533	0.0855246	0.830879	2.62007	0.995675	0.222188	0.548643	0.551026	1293.43	12.6022		1306.28	14.3419	1327.44	31.5272		1327.44	31.5272	1327.44	31.5272	1293.43	12.6022	2.56241	2.50134
10	45.1727	19272.7	2.37592	0.0891953	3.56843	2.73827	5.15548	0.222655	3.72093	0.721742	1295.89	85.6172		1338.91	75.1912	1408.34	133.932		1408.34	133.932	1408.34	133.932	1295.89	85.6172	7.98448	10.6551
99	86.1629	14422.5	1.57223	0.0863395	3.08471	2.6848	3.51083	0.225528	1.67646	0.477511	1311.02	38.9804		1324.28	50.9201	1345.78	116.772		1345.78	116.772	1345.78	116.772	1311.02	38.9804	2.58267	8.93534
6	140.41	97031.9	3.1399	0.0904506	0.715544	2.8505	1.11014	0.228564	0.848763	0.764558	1326.97	19.9513		1368.94	16.3559	1435.04	26.7502		1435.04	26.7502	1435.04	26.7502	1326.97	19.9513	7.53096	2.2145
52	404.584	2974.89	1.26053	0.0867245	1.82125	2.7339	3.07848	0.228634	2.48194	0.806225	1327.33	58.3563		1337.72	44.8658	1354.36	68.85		1354.36	68.85	1354.36	68.85	1327.33	58.3563	1.99552	6.58689
47	130.983	14376.6	1.89553	0.0848127	1.99605	2.69946	2.44473	0.230842	1.41154	0.577383	1338.91	33.4489		1328.31	35.5059	1311.24	75.8853		1311.24	75.8853	1311.24	75.8853	1338.91	33.4489	-2.11022	6.43649
1	216.708	56708.7	2.57844	0.0879405	1.2894	2.85603	1.48505	0.235544	0.736764	0.496119	1363.49	17.7467		1370.4	21.8911	1381.17	48.562		1381.17	48.562	1381.17	48.562	1363.49	17.7467	1.27981	3.7012
15	126.995	35180.9	2.15368	0.0887195	1.59698	2.88142	3.31715	0.235552	2.90743	0.876484	1363.53	70.0347		1377.06	49.0179	1398.09	60.0052		1398.09	60.0052	1398.09	60.0052	1363.53	70.0347	2.47216	6.52796
95	185.02	3863.14	1.61792	0.0878204	1.01415	2.88437	1.88837	0.238207	1.59294	0.843549	1377.37	38.7199		1377.83	27.9082	1378.54	38.2092		1378.54	38.2092	1378.54	38.2092	1377.37	38.7199	0.0851006	3.94442
100	101.344	34505	2.28048	0.0896489	1.68259	2.95378	2.26374	0.238963	1.51441	0.668985	1381.31	36.9056		1395.82	33.6605	1418.04	63.0511		1418.04	63.0511	1418.04	63.0511	1381.31	36.9056	2.5906	5.05296
74	138.825	54588.5	2.69976	0.0883875	1.65105	2.91292	1.89735	0.239021	0.934862	0.492721	1381.61	22.7866		1385.27	28.1118	1390.9	62.1006		1390.9	62.1006	1390.9	62.1006	1381.61	22.7866	0.668367	4.72784
14	258.648	149384	3.14532	0.090237	0.81381	3.00155	2.90617	0.241246	2.7899	0.959992	1393.17	68.5124		1408.01	43.3904	1430.53	30.4425		1430.53	30.4425	1430.53	30.4425	1393.17	68.5124	2.61183	5.21847
125	196.529	13438.7	2.85327	0.091878	0.815377	3.09042	1.98562	0.243952	1.81048	0.911797	1407.21	44.8612		1430.32	29.8582	1464.85	30.3603		1464.85	30.3603	1464.85	30.3603	1407.21	44.8612	3.93466	3.65284
2	155.184	136545	0.977321	0.0908797	1.42118	3.09539	1.698	0.247028	0.929231	0.547249	1423.13	23.2578		1431.55	25.5428	1444.06	53.0671		1444.06	53.0671	1444.06	53.0671	1423.13	23.2578	1.44955	3.96356
59	407.929	95527.4	2.53171	0.0919866	0.315193	3.13386	1.7169	0.247089	1.68772	0.983004	1423.45	42.2506		1441.04	25.9048	1467.09	11.7324		1467.09	11.7324	1467.09	11.7324	1423.45	42.2506	2.97482	2.98258
113	260.767	16619.3	1.3239	0.0938935	0.825012	3.20752	2.50472	0.247761	2.36494	0.944196	1426.92	59.3335		1458.98	38.005	1505.96	30.5475		1505.96	30.5475	1505.96	30.5475	1426.92	59.3335	5.24827	4.38372
98	109.588	7318.6	3.35319	0.0874969	1.97328	2.99494	3.44279	0.248253	2.82116	0.819441	1429.46	70.8923		1406.34	51.3772	1371.44	74.4218		1371.44	74.4218	1371.44	74.4218	1429.46	70.8923	-4.23035	7.66235
17	209.35	123170	1.80156	0.0914815	0.619654	3.16269	0.916016	0.250739	0.674622	0.736474	1442.29	17.088		1448.1	13.8509	1456.63	23.0979		1456.63	23.0979	1456.63	23.0979	1442.29	17.088	0.984353	1.95996
69	165.762	133168	2.9351	0.0914332	1.1099	3.18526	2.40195	0.252662	2.13014	0.886837	1452.19	54.2864		1453.59	36.3849	1455.62	41.3785		1455.62	41.3785	1455.62	41.3785	1452.19	54.2864	0.235965	4.68522
40	256.606	56894.7	2.55083	0.090667	0.845595	3.16858	2.82313	0.253463	2.69352	0.954089	1456.31	68.8179		1449.54	42.713	1439.6	31.5927		1439.6	31.5927	1439.6	31.5927	1456.31	68.8179	-1.16076	5.2707
4	234.364	20725.4	3.41925	0.092779	0.7588	3.24633	0.874284	0.253771	0.434276	0.496722	1457.89	11.1062		1468.3	13.3022	1483.36	28.1835		1483.36	28.1835	1483.36	28.1835	1457.89	11.1062	1.71698	2.01186
64	182.343	94075.7	2.28578	0.0916004	0.80981	3.20902	1.1242	0.254082	0.779762	0.693616	1459.49	19.9611		1459.34	17.0581	1459.1	30.1763		1459.1	30.1763	1459.1	30.1763	1459.49	19.9611	-0.0270478	2.48014
32	45.2681	11682.8	2.09425	0.0912746	3.04407	3.2135	3.62381	0.255345	1.96612	0.542555	1465.98	50.53		1460.42	55.0171	1452.32	113.56		1452.32	113.56	1452.32	113.56	1465.98	50.53	-0.940505	8.62559
63	189.112	26120.1	0.535212	0.0961487	1.41876	3.38529	1.72898	0.255359	0.988185	0.571541	1466.05	25.3978		1501	26.5644	1550.66	52.2259		1550.66	52.2259	1550.66	52.2259	1466.05	25.3978	5.45623	3.58075
86	66.4725	91825.4	1.72823	0.0923505	3.07908	3.2611	3.34652	0.256108	1.31088	0.391716	1469.9	33.7704		1471.82	50.9819	1474.59	114.521		1474.59	114.521	1474.59	114.521	1469.9	33.7704	0.317991	8.07322
30	111.884	123100	1.25243	0.0934953	1.26287	3.3599	1.51726	0.260637	0.840973	0.55427	1493.1	21.9686		1495.1	23.2711	1497.92	46.8128		1497.92	46.8128	1497.92	46.8128	1493.1	21.9686	0.321969	3.44309
109	157.571	13243.7	1.72578	0.0954936	0.77872	3.43766	1.69474	0.261088	1.50524	0.888182	1495.41	39.3752		1513.05	26.129	1537.81	28.7148		1537.81	28.7148	1537.81	28.7148	1495.41	39.3752	2.75754	3.13895
96	165.172	18087.4	0.751314	0.0980666	0.934597	3.77828	1.75012	0.279429	1.47968	0.845473	1588.49	40.8319		1588.14	27.5426	1587.66	34.2352		1587.66	34.2352	1587.66	34.2352	1587.66	34.2352	-0.051751	3.35691
102	96.0511	8208.09	0.984814	0.0984011	0.613069	3.69689	1.52921	0.27248	1.40094	0.91612	1553.38	37.9035		1570.7	23.9553	1594.03	22.4405		1594.03	22.4405	1594.03	22.4405	1594.03	22.4405	2.54984	2.74523
43	66.4308	36932.6	1.72188	0.0995033	2.16739	4.03589	2.36022	0.294172	0.93438	0.395886	1662.34	26.8354		1641.46	37.6491	1614.8	79.1262		1614.8	79.1262	1614.8	79.1262	1614.8	79.1262	-2.94413	5.31102
76	55.0989	19386.7	0.960117	0.100093	3.29271	3.9338	3.387	0.285042	0.793642	0.23432	1616.7	22.2428		1620.66	53.7574	1625.79	120.052		1625.79	120.052	1625.79	120.052	1625.79	120.052	0.558818	7.46934
34	251.755	55609.9	0.699287	0.100384	0.38781	4.00615	2.2289	0.289443	2.19491	0.984747	1638.74	62.2522		1635.44	35.5015	1631.18	14.1271		1631.18	14.1271	1631.18	14.1271	1631.18	14.1271	-0.463591	3.91431
112	215.062	16209.5	2.72269	0.100578	0.805598	3.87477	1.95655	0.27941	1.78301	0.9113	1588.39	49.1996		1608.44	30.9531	1634.78	29.3297		1634.78	29.3297	1634.78	29.3297	1634.78	29.3297	2.83784	3.47795
115	213.755	16372.6	1.01768	0.100778	0.654484	3.93339	2.21656	0.283073	2.11773	0.955414	1606.82	59.0332		1620.58	35.1749	1638.48	23.8192		1638.48	23.8192	1638.48	23.8192	1638.48	23.8192	1.93193	3.87474
7	119.638	33838.6	1.44679	0.100993	1.09161	3.96639	1.25541	0.28484	0.620044	0.493897	1615.69	17.368		1627.35	19.9545	1642.43	39.7083		1642.43	39.7083	1642.43	39.7083	1642.43	39.7083	1.62773	2.6028
53	186.163	24305.2	2.72313	0.101158	0.621637	4.09743	2.41737	0.293771	2.33608	0.96637	1660.34	67.0218		1653.79	38.6762	1645.46	22.6034		1645.46	22.6034	1645.46	22.6034	1645.46	22.6034	-0.904581	4.30253
24	135.95	77210.1	0.966366	0.101849	0.58988	4.03233	1.72446	0.287144	1.62043	0.939675	1627.24	45.675		1640.74	27.5013	1658.07	21.4108		1658.07	21.4108	1658.07	21.4108	1658.07	21.4108	1.85913	3.03225
39	133.792	14517.1	2.40529	0.101925	1.45771	4.16664	1.80791	0.296486	1.06939	0.591508	1673.86	30.8993		1667.49	29.0182	1659.45	52.9083		1659.45	52.9083	1659.45	52.9083	1659.45	52.9083	-0.868329	3.71614
116	49.3114	3757.55	1.14592	0.102152	0.695523	4.18432	1.75046	0.297081	1.60635	0.917673	1676.82	46.4862		1670.95	28.119	1663.58	25.2282		1663.58	25.2282	1663.58	25.2282	1663.58	25.2282	-0.795889	3.18511
101	120.032	8993.15	1.10348	0.102236	0.873769	4.02644	1.2792	0.285638	0.934286	0.730365	1619.69	26.2272		1639.55	20.394	1665.09	31.6886		1665.09	31.6886	1665.09	31.6886	1665.09	31.6886	2.72631	2.43065
75	112.482	81876.6	0.537118	0.104281	1.43438	4.20196	2.94207	0.292243	2.56872	0.8731	1652.73	73.4		1674.4	47.3048	1701.66	51.7829		1701.66	51.7829	1701.66	51.7829	1701.66	51.7829	2.87539	5.22888
104	138.299	12332.4	1.32892	0.105071	0.758749	4.41022	2.83901	0.304421	2.73574	0.963625	1713.2	80.6699		1714.26	46.0655	1715.54	27.3413		1715.54	27.3413	1715.54	27.3413	1715.54	27.3413	0.136916	4.96434
123	41.5655	3977.56	3.46812	0.10525	0.77787	4.39354	2.00073	0.302755	1.84332	0.921325	1704.96	54.1261		1711.13	32.4379	1718.67	28.0228		1718.67	28.0228	1718.67	28.0228	1718.67	28.0228	0.797913	3.54039
22	456.823	13765.3	2.45294	0.105967	0.547141	4.17433	0.736658	0.285704	0.493257	0.669587	1620.03	13.8492		1669	11.8274	1731.13	19.6797		1731.13	19.6797	1731.13	19.6797	1731.13	19.6797	6.41801	1.33109
18	339.315	1635.8	1.34614	0.109131	2.41772	4.35726	3.25195	0.289578	2.17482	0.668774	1639.42	61.7048		1704.27	52.6505	1784.94	86.3836		1784.94	86.3836	1784.94	86.3836	1784.94	86.3836	8.15269	5.63107
110	321.049	10007.6	2.37777	0.109605	1.61501	4.26262	2.53738	0.282063	1.95705	0.771287	1601.74	54.4019		1686.18	40.9078	1792.84	57.6422		1792.84	57.6422	1792.84	57.6422	1792.84	57.6422	10.6589	4.17834
9	144.841	183927	2.74581	0.109888	0.496541	4.7385	0.961523	0.312744	0.823392	0.856341	1754.2	24.7851		1774.07	15.8015	1797.53	17.7133		1797.53	17.7133	1797.53	17.7133	1797.53	17.7133	2.41071	1.68107
65	64.768	40820.9	1.14683	0.111871	1.24818	4.97305	2.06189	0.322405	1.64117	0.795955	1801.46	50.5555		1814.75	34.1681	1830.02	44.3478		1830.02	44.3478	1830.02	44.3478	1830.02	44.3478	1.56054	3.65
82	288.192	3164.71	2.53568	0.113494	0.582549	5.15335	2.23055	0.329317	2.15313	0.965293	1835.07	67.3961		1844.95	37.1814	1856.09	20.63		1856.09	20.63	1856.09	20.63	1856.09	20.63	1.13215	3.79373
111	74.861	8375.37	2.39784	0.114544	0.719842	5.39341	1.64101	0.3415	1.4747	0.898654	1893.88	47.4329		1883.81	27.5521	1872.7	25.4457		1872.7	25.4457	1872.7	25.4457	1872.7	25.4457	-1.13096	2.8816
27	40.8632	20848.5	0.669294	0.116574	2.6004	5.44436	3.15174	0.338722	1.78084	0.565033	1880.52	56.9318		1891.87	53.0037	1904.33	91.5814		1904.33	91.5814	1904.33	91.5814	1904.33	91.5814	1.25013	5.61166
122	182.827	17612.1	3.09639	0.116818	0.945104	5.46259	1.57173	0.339147	1.25584	0.799013	1882.57	40.1854		1894.74	26.4413	1908.08	33.2677		1908.08	33.2677	1908.08	33.2677	1908.08	33.2677	1.33704	2.71931
50	148.727	120578	1.17568	0.117984	0.770469	5.73442	3.1533	0.352504	3.05773	0.96969	1946.54	100.695		1936.57	53.4497	1925.91	27.0591		1925.91	27.0591	1925.91	27.0591	1925.91	27.0591	-1.07154	5.41786
48	122.079	51445.2	2.21221	0.123642	1.03376	6.44147	1.83472	0.377849	1.51576	0.826154	2066.23	52.5199		2037.94	31.6095	2009.42	35.9545		2009.42	35.9545	2009.42	35.9545	2009.42	35.9545	-2.8271	3.19633
107	234.963	19426.1	1.81166	0.124002	0.568621	5.97139	1.74516	0.349258	1.64992	0.945429	1931.05	53.9624		1971.69	29.7515	2014.58	19.7669		2014.58	19.7669	2014.58	19.7669	2014.58	19.7669	4.14585	2.83892
58	103.577	54300.2	2.28415	0.130881	0.627542	7.02899	1.12272	0.389508	0.930962	0.829203	2120.54	32.9733		2115.1	19.5616	2109.8	21.5757		2109.8	21.5757	2109.8	21.5757	2109.8	21.5757	-0.509199	1.87056
87	344.503	151.473	0.65513	0.133755	5.36149	5.97878	5.49377	0.324192	1.19829	0.218117	1810.17	37.067		1972.76	93.7369	2147.83	183.708		2147.83	183.708	2147.83	183.708	2147.83	183.708	15.7209	7.41228
124	200.964	6546.03	1.8052	0.153782	2.05033	7.76746	4.39219	0.366331	3.88426	0.884356	2012.11	131.588		2204.44	77.4803	2388.39	68.427		2388.39	68.427	2388.39	68.427	2388.39	68.427	15.7545	6.01497
78	260.562	103413	2.02651	0.159841	0.786679	9.767	1.69927	0.44317	1.5062	0.886384	2364.82	58.4405		2413.04	30.6796	2453.97	26.0729		2453.97	26.0729	2453.97	26.0729	2453.97	26.0729	3.63313	2.59224
41	62.4815	39472.7	1.84931	0.163771	0.789389	10.8583	1.31974	0.480867	1.05763	0.801391	2531.04	43.3928		2511.07	24.0511	2494.96	26.0609		2494.96	26.0609	2494.96	26.0609	2494.96	26.0609	-1.44624	2.0366
108	141.579	18323.1	1.35055	0.164402	0.560616	10.4982	2.21299	0.463134	2.14081	0.96738	2453.38	85.6211		2479.76	40.2171	2501.43	18.4903		2501.43	18.4903	2501.43	18.4903	2501.43	18.4903	1.92094	3.49882
56	73.1478	49155	1.08097	0.170007	0.889395	11.627	1.98793	0.49602	1.77788	0.894335	2596.67	74.4805		2574.85	36.4337	2557.69	29.1756		2557.69	29.1756	2557.69	29.1756	2557.69	29.1756	-1.52385	3.13385
29	119.654	119314	1.60085	0.171619	0.608236	11.54	0.998524	0.487685	0.791896	0.793067	2560.65	32.7999		2567.83	18.288	2573.48	19.9255		2573.48	19.9255	2573.48	19.9255	2573.48	19.9255	0.498583	1.48928
12	342.647	22792.3	1.54408	0.182501	0.188214	12.2479	2.40402	0.486737	2.39664	0.996931	2556.54	99.1393		2623.58	44.2394	2675.72	6.10556		2675.72	6.10556	2675.72	6.10556	2675.72	6.10556	4.45395	3.71155
72	47.2147	86906.9	2.60149	0.183037	0.820294	12.9758	1.3312	0.514156	1.04843	0.787583	2674.35	44.982		2677.9	24.5985	2680.57	26.592		2680.57	26.592	2680.57	26.592	2680.57	26.592	0.232083	1.9482
23	178.395	236512	10.0098	0.185304	0.277021	12.9647	1.34544	0.507432	1.31661	0.978574	2645.66	55.9982		2677.09	24.8601	2700.91	8.96548		2700.91	8.96548	2700.91	8.96548	2700.91	8.96548	2.04573	2.09865
25	27.9905	28482.2	1.04037	0.186311	0.990034	13.4087	1.59234	0.52197	1.24715	0.783217	2707.53	54.0424		2708.87	29.4927	2709.85	32.015		2709.85	32.015	2709.85	32.015	2709.85	32.015	0.0857677	2.31745
28	62.9677	92234.5	0.613718	0.187586	0.911533	13.1558	1.82119	0.508645	1.57666	0.865728	2650.84	67.165		2690.89	33.6873	2721.1	29.4384		2721.1	29.4384	2721.1	29.4384	2721.1	29.4384	2.58202	2.68389
79	46.8331	85743.7	0.734856	0.188795	1.2379	13.9508	1.87829	0.535928	1.41265	0.752092	2766.38	62.2798		2746.37	34.8841	2731.68	39.9431		2731.68	39.9431	2731.68	39.9431	2731.68	39.9431	-1.27012	2.71858
11	48.609	102087	2.0887	0.18957	0.9944	13.3619	1.88014	0.511207	1.59564	0.848685	2661.78	68.2005		2705.57	34.8158	2738.42	32.0644		2738.42	32.0644	2738.42	32.0644	2738.42	32.0644	2.79861	2.73824
44	265.928	367638	2.4334	0.191039	0.240247	13.9887	0.899794	0.531073	0.867127	0.963696	2745.97	38.0029		2748.94	16.7129	2751.11	7.73918		2751.11	7.73918	2751.11	7.73918	2751.11	7.73918	0.186811	1.40961
Rejected Analyses (>10% discordant; >5% reverse discordant; >10% 2σ uncertainty)
80	108.5	33355.6	0.936996	0.0758971	3.52038	1.99724	3.79001	0.190855	1.40395	0.370434	1126.01	28.4296		1114.58	50.2722	1092.34	138.234	x	1092.34	138.234	1126.01	28.4296	1126.01	28.4296	-3.08214	13.302			x
51	50.4384	15720.1	3.58534	0.0793406	5.65203	2.26294	5.93257	0.20686	1.80277	0.303876	1212.07	39.0422		1200.82	81.9291	1180.66	219.134	x	1180.66	219.134	1180.66	219.134	1212.07	39.0422	-2.6598	19.3387			x
45	68.8937	20267.7	1.97468	0.0812356	3.43567	2.41116	3.87775	0.215268	1.79808	0.463692	1256.82	40.2432		1245.93	54.5631	1227.13	132.268	x	1227.13	132.268	1227.13	132.268	1256.82	40.2432	-2.4193	11.5162			x
21	110.417	17387	2.65084	0.0851762	3.48216	2.55017	4.93711	0.217144	3.49995	0.708906	1266.77	78.8947		1286.48	70.6091	1319.54	132.312	x	1319.54	132.312	1319.54	132.312	1266.77	78.8947	3.99898	11.3318			x
8	49.3511	22572.8	2.99407	0.0888581	4.34469	2.91106	4.78474	0.237603	2.00436	0.418907	1374.23	48.621		1384.79	70.9063	1401.08	163.252	x	1401.08	163.252	1401.08	163.252	1374.23	48.621	1.91696	11.9437			x
60	70.1857	68125.5	2.46725	0.0913431	3.90981	3.22329	4.37066	0.255931	1.95348	0.446953	1468.99	50.2971		1462.78	66.4115	1453.75	145.847	x	1453.75	145.847	1453.75	145.847	1468.99	50.2971	-1.04853	10.7118			x
36	32.3255	18527.4	2.0949	0.0942853	5.16963	3.44154	5.69698	0.264733	2.39386	0.420197	1514.01	63.3119		1513.94	87.9089	1513.82	191.352	x	1513.82	191.352	1513.82	191.352	1513.82	191.352	-0.0126724	13.3158			x
57	185.036	36916.3	0.856487	0.0998159	0.818638	3.74867	8.03809	0.27238	7.99629	0.9948	1552.87	216.304	x	1581.83	126.453	1620.64	29.8589		1620.64	29.8589	1620.64	29.8589	1620.64	29.8589	4.18119	13.4631			x
31	23.0994	13531.7	1.37462	0.104294	6.10128	4.23579	6.62645	0.29456	2.58537	0.39016	1664.28	74.3283		1680.99	106.791	1701.88	220.453	x	1701.88	220.453	1701.88	220.453	1701.88	220.453	2.20969	13.399			x
93	352.64	1077.18	1.03788	0.105962	8.39941	4.14974	10.029	0.284034	5.48006	0.546421	1611.64	153.17		1664.16	161.186	1731.05	302.637	x	1731.05	302.637	1731.05	302.637	1731.05	302.637	6.89802	18.5265			x
97	33.4047	6241.02	1.40889	0.0713701	10.3179	1.77781	11.5978	0.180662	5.29609	0.456647	1070.59	102.396		1037.38	147.994	968.031	413.793	x	968.031	413.793	1070.59	102.396	1070.59	102.396	-10.5949	48.4436			x
73	121.941	1636.48	1.55543	0.08112	3.64291	2.61007	5.93804	0.233359	4.6893	0.789705	1352.08	112.106		1303.48	85.4935	1224.33	140.31	x	1224.33	140.31	1224.33	140.31	1352.08	112.106	-10.4337	15.6208			x
5	37.7598	13380.2	1.67713	0.075304	6.96094	1.93277	7.52345	0.186149	2.85442	0.379403	1100.48	56.6		1092.5	98.7556	1076.65	274.224	x	1076.65	274.224	1100.48	56.6	1100.48	56.6	-2.21376	26.5596			x
46	779.498	5104.98	1.73725	0.0750118	1.20016	1.7031	19.8326	0.164668	19.7963	0.998167	982.667	353.736	x	1009.7	249.989	1068.84	47.28		1068.84	47.28	982.667	353.736	982.667	353.736	8.06209	33.3443			x
37	35.5651	11321.2	1.97914	0.0802046	9.51552	2.00889	9.81952	0.181658	2.42441	0.246897	1076.03	47.0918		1118.52	130.662	1202.02	368.369	x	1202.02	368.369	1076.03	47.0918	1076.03	47.0918	10.4819	27.7119			x
118	168.3	6186.35	2.36697	0.155767	8.22093	8.5134	9.95432	0.396394	5.61291	0.563867	2152.41	201.335		2287.36	177.753	2410.2	274.205	x	2410.2	274.205	2410.2	274.205	2410.2	274.205	10.6958	13.1531			x
20	19.0903	10557.6	2.42277	0.0868644	12.0685	2.42429	12.2487	0.202415	2.09355	0.17092	1188.28	44.5294		1249.83	173.015	1357.47	457.654	x	1357.47	457.654	1188.28	44.5294	1188.28	44.5294	12.4637	29.6935			x
71	275.989	1209.06	1.59683	0.178649	2.01817	9.99146	4.15134	0.405628	3.62776	0.873876	2194.9	132.277		2433.99	75.137	2640.36	65.6903		2640.36	65.6903	2640.36	65.6903	2640.36	65.6903	16.8711	5.41994	x		x
55	288.019	859.531	1.45897	0.095822	3.14458	2.88582	3.44038	0.218425	1.39564	0.405664	1273.55	31.612		1378.21	50.8597	1544.27	115.876		1544.27	115.876	1544.27	115.876	1273.55	31.612	17.5306	6.51801	x		x
77	842.786	1784.04	2.40805	0.0598031	4.36286	0.652541	4.41992	0.0791377	0.707955	0.160174	490.974	6.55974		510.041	34.7377	596.466	185.315	x	490.974	6.55974	490.974	6.55974	490.974	6.55974	17.6863	25.5975			x
117	341.227	7768.42	4.16662	0.0793572	5.71775	1.78086	5.84284	0.162758	1.20256	0.205817	972.085	21.2683		1038.49	74.5012	1181.08	221.674	x	1181.08	221.674	972.085	21.2683	972.085	21.2683	17.695	15.5523			x
70	326.57	641.604	1.21536	0.155457	3.30487	7.56011	7.84039	0.352708	7.10982	0.90682	1947.52	234.258	x	2180.14	138.028	2406.83	110.104		2406.83	110.104	2406.83	110.104	2406.83	110.104	19.0835	10.4132			x
3	182.003	1947.56	0.897026	0.0768744	2.69559	1.59183	4.50302	0.15018	3.60708	0.801035	901.974	59.5086		967.013	55.0542	1117.95	105.433		1117.95	105.433	901.974	59.5086	901.974	59.5086	19.319	9.28602	x		x
66	224.585	830.892	1.42643	0.0880651	6.68016	2.28442	8.61242	0.188135	5.43592	0.631172	1111.27	108.758		1207.48	119.357	1383.89	251.732	x	1383.89	251.732	1111.27	108.758	1111.27	108.758	19.6997	16.5867			x
94	97.5669	341.895	1.05041	0.110293	11.097	3.81795	12.16	0.251061	4.97214	0.408894	1443.94	126.076		1596.54	192.37	1804.23	396.762	x	1804.23	396.762	1804.23	396.762	1443.94	126.076	19.9691	18.9358			x
67	156.829	316.279	1.60852	0.109898	25.8091	3.74332	26.1174	0.24704	4.00112	0.153198	1423.19	100.15		1580.68	416.156	1797.69	937.02	x	1797.69	937.02	1797.69	937.02	1423.19	100.15	20.8325	41.6392			x
19	132.793	504.005	0.913063	0.0942275	15.3854	2.64794	16.4337	0.203812	5.77522	0.351427	1195.76	123.546	x	1314.07	238.536	1512.66	572.571	x	1512.66	572.571	1195.76	123.546	1195.76	123.546	20.9496	31.0167			x
13	318.031	22255.2	1.60089	0.084884	14.7963	2.02851	17.9869	0.173321	10.2273	0.568598	1030.38	190.899	x	1125.12	240.938	1312.87	565.631	x	1312.87	565.631	1030.38	190.899	1030.38	190.899	21.5169	36.8071			x
84	228.601	799.322	1.22607	0.103778	1.7694	2.839	2.99523	0.198407	2.41674	0.806862	1166.76	50.5546		1365.9	44.0895	1692.75	63.9489		1692.75	63.9489	1166.76	50.5546	1166.76	50.5546	31.073	3.96231	x		x
26	355.549	505.032	1.5196	0.109052	32.1158	3.03298	32.6825	0.201713	6.05963	0.185409	1184.52	128.519	x	1415.96	499.376	1783.63	1179.92	x	1783.63	1179.92	1184.52	128.519	1184.52	128.519	33.5895	44.5194			x
90	389.604	407.685	0.777218	0.0799894	7.05859	1.4455	7.7944	0.131064	3.30591	0.424139	793.935	48.4021		908.007	91.7544	1196.71	273.157	x	793.935	48.4021	793.935	48.4021	793.935	48.4021	33.6568	15.6741	x		x
61	655.18	388.013	1.13731	0.0960108	5.36754	1.99353	7.23512	0.150592	4.85145	0.670541	904.278	80.2289		1113.32	95.9638	1547.97	197.79	x	1547.97	197.79	904.278	80.2289	904.278	80.2289	41.5828	9.08715	x		x
85	685.556	2980.68	1.5936	0.143051	8.19011	4.30477	24.344	0.218252	22.9249	0.941707	1272.63	519.214	x	1694.27	398.39	2264.45	277.373	x	2264.45	277.373	2264.45	277.373	1272.63	519.214	43.7996	23.94	x		x
103	625.014	2483.56	0.591753	0.123725	3.59703	2.74049	6.01612	0.160645	4.82235	0.801571	960.362	84.335		1339.51	87.7776	2010.61	125.125		2010.61	125.125	960.362	84.335	960.362	84.335	52.2354	5.14096	x		x
J1357A, Illtyd(?) Fm, White Uplift (Cambrian), University of Arizona, n=93/100
27	9.50727	483.222	51.5941	0.0670099	1.98989	1.47345	2.61496	0.159476	1.69656	0.648791	953.863	29.4834		919.544	31.004	838.067	81.2336		838.067	81.2336	953.863	29.4834	953.863	29.4834	-13.817	11.5796
19	283.329	12623.9	64.5118	0.0745397	0.586767	1.80083	1.30538	0.175221	1.16607	0.893281	1040.81	21.9667		1045.76	16.704	1056.13	23.1969		1056.13	23.1969	1040.81	21.9667	1040.81	21.9667	1.45087	3.00187
52	122.111	6993.62	4.95578	0.0753671	0.5853	1.83779	2.83602	0.176853	2.77497	0.978472	1049.76	52.6896		1059.07	36.5561	1078.32	22.9954		1078.32	22.9954	1049.76	52.6896	1049.76	52.6896	2.64832	5.30903
18	22.3336	1190.55	1.73929	0.0751825	1.83189	1.83556	2.95155	0.177072	2.31427	0.784085	1050.96	43.9882		1058.27	38.0293	1073.4	72.1204		1073.4	72.1204	1050.96	43.9882	1050.96	43.9882	2.09105	7.75038
56	71.0284	3786.75	2.43221	0.0759403	0.566738	1.85469	3.26879	0.177132	3.21929	0.984855	1051.29	61.2083		1065.1	42.2718	1093.52	22.2289		1093.52	22.2289	1051.29	61.2083	1051.29	61.2083	3.8615	5.92874
85	61.8482	3005.93	1.27233	0.0727256	1.10436	1.78063	2.0273	0.177576	1.7001	0.838602	1053.72	32.3925		1038.41	25.8379	1006.3	43.9065		1006.3	43.9065	1053.72	32.3925	1053.72	32.3925	-4.71254	5.58889
91	92.9963	4904.76	0.553782	0.0747492	1.13846	1.8589	1.84166	0.180364	1.44762	0.786043	1068.96	27.9488		1066.6	23.8327	1061.78	44.9325		1061.78	44.9325	1068.96	27.9488	1068.96	27.9488	-0.67603	5.00797
55	133.098	6477.23	1.10031	0.0759275	0.528039	1.89576	1.89858	0.181085	1.82367	0.960545	1072.9	35.3283		1079.6	24.7376	1093.14	20.7099		1093.14	20.7099	1072.9	35.3283	1072.9	35.3283	1.85153	3.72857
89	128.756	7890.01	2.85405	0.0764115	0.784505	1.92592	3.00981	0.1828	2.90577	0.965433	1082.26	56.7419		1090.12	39.4327	1105.88	30.7688		1105.88	30.7688	1082.26	56.7419	1082.26	56.7419	2.13592	5.80867
30	33.2006	1597.44	1.48833	0.0742914	1.37873	1.87347	2.33659	0.182897	1.88647	0.80736	1082.78	36.854		1071.76	30.3209	1049.41	54.4893		1049.41	54.4893	1082.78	36.854	1082.78	36.854	-3.1798	6.4059
6	175.581	9463.14	1.45934	0.0764189	0.914451	1.9319	1.60221	0.183351	1.31561	0.821127	1085.26	25.7557		1092.2	21.0114	1106.05	35.8234		1106.05	35.8234	1085.26	25.7557	1085.26	25.7557	1.88042	3.93977
93	28.5766	1741.36	1.57906	0.0744009	1.19277	1.8953	2.57788	0.184756	2.28534	0.886519	1092.9	45.0294		1079.44	33.5873	1052.38	47.1406		1052.38	47.1406	1092.9	45.0294	1092.9	45.0294	-3.85027	6.32045
23	32.5141	1758.33	2.34065	0.0792929	1.15217	2.02312	1.63149	0.185049	1.1551	0.708004	1094.5	22.79		1123.31	21.7297	1179.48	44.6698		1179.48	44.6698	1094.5	22.79	1094.5	22.79	7.20468	4.01055
21	158.14	6048.77	5.21183	0.0790022	0.722364	2.01949	2.65522	0.185396	2.55507	0.962282	1096.39	50.4913		1122.09	35.346	1172.21	28.0621		1172.21	28.0621	1096.39	50.4913	1096.39	50.4913	6.46814	4.85459
98	241.718	12529.2	1.91509	0.0754442	0.811057	1.94599	1.97421	0.187074	1.79992	0.911714	1105.5	35.8396		1097.06	25.9546	1080.38	31.8742		1080.38	31.8742	1105.5	35.8396	1105.5	35.8396	-2.32529	4.48533
94	66.1498	3618.32	1.88849	0.0760689	1.16895	1.9697	1.81719	0.187798	1.39131	0.765639	1109.44	27.7938		1105.2	23.9881	1096.9	45.8567		1096.9	45.8567	1109.44	27.7938	1109.44	27.7938	-1.14257	4.92942
61	34.2615	2006.96	2.07657	0.0769888	1.21411	1.99358	2.82927	0.187804	2.55552	0.903245	1109.47	51.0523		1113.34	37.5019	1120.92	47.496		1120.92	47.496	1109.47	51.0523	1109.47	51.0523	1.02165	6.19135
4	162.327	8973.31	2.93179	0.0760113	0.805065	1.97006	2.27	0.187975	2.12244	0.934997	1110.4	42.4331		1105.33	29.9681	1095.39	31.5692		1095.39	31.5692	1110.4	42.4331	1110.4	42.4331	-1.37013	4.85195
43	337.648	19042.5	4.21918	0.0761919	0.776581	1.98325	2.00559	0.188785	1.84914	0.921993	1114.79	37.103		1109.83	26.5364	1100.12	30.4115		1100.12	30.4115	1114.79	37.103	1114.79	37.103	-1.33344	4.38425
74	65.347	4224.36	2.44773	0.0754879	0.636952	1.97923	1.6615	0.19016	1.53456	0.923599	1122.24	30.9793		1108.46	21.9683	1081.53	25.0417		1081.53	25.0417	1122.24	30.9793	1122.24	30.9793	-3.76423	3.73859
33	140.437	7894.39	2.56825	0.0779386	0.809376	2.04785	2.54925	0.190566	2.41735	0.94826	1124.44	48.8885		1131.58	34.0914	1145.33	31.5111		1145.33	31.5111	1124.44	48.8885	1124.44	48.8885	1.82401	5.05134
99	334.275	18312.9	2.93135	0.0767534	0.85338	2.02938	2.00989	0.191763	1.81972	0.905385	1130.92	36.9961		1125.41	26.7975	1114.77	33.369		1114.77	33.369	1130.92	36.9961	1130.92	36.9961	-1.44841	4.49839
58	107.278	6442.08	2.40932	0.079315	0.550123	2.13502	2.02081	0.19523	1.94449	0.962232	1149.64	40.1305		1160.21	27.3905	1180.03	21.3374		1180.03	21.3374	1149.64	40.1305	1149.64	40.1305	2.57491	3.83001
9	120.402	6229.35	3.22735	0.0795946	0.699152	2.1564	2.39401	0.196491	2.28965	0.956406	1156.44	47.5093		1167.11	32.5528	1186.98	27.0626		1186.98	27.0626	1156.44	47.5093	1156.44	47.5093	2.57247	4.57761
45	228.591	12933.7	2.81906	0.0783046	0.500118	2.14612	1.98664	0.198777	1.92266	0.967795	1168.75	40.2815		1163.8	26.9718	1154.59	19.4514		1154.59	19.4514	1168.75	40.2815	1168.75	40.2815	-1.22584	3.88329
44	148.021	8427.48	2.24055	0.0780408	0.910287	2.14462	2.23129	0.199309	2.03717	0.912998	1171.61	42.7759		1163.32	30.2872	1147.92	35.4242		1147.92	35.4242	1171.61	42.7759	1171.61	42.7759	-2.06407	4.87917
28	390.923	22578.9	2.09061	0.0800474	0.721647	2.22854	1.46935	0.201917	1.27993	0.871085	1185.61	27.1681		1190.06	20.1856	1198.16	27.8689		1198.16	27.8689	1185.61	27.1681	1185.61	27.1681	1.04742	3.23094
48	18.2545	1039.96	0.454986	0.0772951	1.88116	2.16138	3.20018	0.202804	2.58891	0.808987	1190.37	55.1538		1168.71	43.5497	1128.8	73.4515		1128.8	73.4515	1190.37	55.1538	1190.37	55.1538	-5.45396	8.42374
53	20.2432	1318.59	1.61124	0.0803176	1.47717	2.2602	3.10916	0.204096	2.73584	0.87993	1197.28	58.5924		1199.97	42.9041	1204.78	57.0407		1204.78	57.0407	1197.28	58.5924	1197.28	58.5924	0.622193	6.7668
8	54.0532	3248.96	1.92601	0.0810814	0.911918	2.28189	1.84902	0.204113	1.6085	0.869922	1197.38	34.4509		1206.7	25.5872	1223.4	35.1169		1223.4	35.1169	1197.38	34.4509	1197.38	34.4509	2.12684	3.97776
64	255.998	15305.4	2.32741	0.0822145	0.6277	2.36838	2.30703	0.20893	2.21999	0.962274	1223.12	48.4762		1233.11	32.2855	1250.63	24.0542		1250.63	24.0542	1250.63	24.0542	1223.12	48.4762	2.20023	4.30845
57	197.357	11557.5	1.98485	0.0839591	0.8536	2.47239	1.57208	0.213574	1.32015	0.839749	1247.83	29.355		1263.99	22.2776	1291.59	32.5536		1291.59	32.5536	1291.59	32.5536	1247.83	29.355	3.38781	3.33092
92	195.359	11699.4	1.47095	0.0816901	0.831967	2.45759	2.64163	0.218191	2.5072	0.94911	1272.31	56.7399		1259.65	37.3719	1238.12	31.9691		1238.12	31.9691	1238.12	31.9691	1272.31	56.7399	-2.76182	5.29548
40	214.641	12741.3	2.92312	0.0833565	0.605706	2.51243	2.74944	0.218602	2.68189	0.975432	1274.48	60.7871		1275.64	39.1447	1277.56	23.1441		1277.56	23.1441	1277.56	23.1441	1274.48	60.7871	0.240707	5.08972
60	300.917	19015.8	1.87177	0.0837314	0.868241	2.53444	2.09682	0.219529	1.90862	0.910243	1279.39	43.4105		1281.98	29.9255	1286.3	33.0999		1286.3	33.0999	1286.3	33.0999	1279.39	43.4105	0.537716	4.23558
2	189.529	11693.9	3.82635	0.0861526	0.976525	2.65492	1.68233	0.223502	1.3699	0.814288	1300.35	31.6184		1316.01	24.3216	1341.59	36.9794		1341.59	36.9794	1341.59	36.9794	1300.35	31.6184	3.07368	3.56262
59	126.785	9022.22	2.13802	0.0862681	0.511457	2.66158	1.8865	0.223763	1.81584	0.962547	1301.73	41.9513		1317.86	27.2924	1344.18	19.3609		1344.18	19.3609	1344.18	19.3609	1301.73	41.9513	3.15808	3.41849
63	44.0757	2786.73	2.655	0.0859327	1.75453	2.65748	3.27594	0.22429	2.76648	0.844484	1304.51	64.0372		1316.72	47.3798	1336.65	66.4939		1336.65	66.4939	1336.65	66.4939	1304.51	64.0372	2.40499	6.82082
87	179.313	11258.9	2.59868	0.0863938	0.618669	2.67621	2.94491	0.224666	2.87919	0.977684	1306.48	66.7373		1321.91	42.6722	1346.99	23.4099		1346.99	23.4099	1346.99	23.4099	1306.48	66.7373	3.00732	5.23345
12	69.263	4896.12	4.17335	0.0858176	0.576643	2.66422	0.93995	0.225161	0.742287	0.789709	1309.09	17.2364		1318.59	13.6015	1334.06	21.8607		1334.06	21.8607	1334.06	21.8607	1309.09	17.2364	1.87198	2.06275
41	59.9681	4127.18	0.956874	0.0856803	0.657445	2.67423	2.06863	0.226369	1.96137	0.948152	1315.44	45.7438		1321.36	29.9663	1330.96	24.9363		1330.96	24.9363	1330.96	24.9363	1315.44	45.7438	1.16647	3.90397
79	54.3727	3538.03	1.82389	0.0857973	0.811794	2.69078	2.57222	0.227459	2.44076	0.948892	1321.17	57.1477		1325.93	37.3255	1333.6	30.778		1333.6	30.778	1333.6	30.778	1321.17	57.1477	0.932441	4.85701
34	47.2486	3671.62	1.5585	0.0853749	0.798043	2.68017	1.64583	0.227684	1.43941	0.874577	1322.35	33.7291		1323	23.8555	1324.05	30.2951		1324.05	30.2951	1324.05	30.2951	1322.35	33.7291	0.128539	3.42216
38	160.382	9797.91	2.54091	0.0860157	0.832757	2.71962	1.44076	0.229313	1.17572	0.816039	1330.9	27.7105		1333.83	20.9654	1338.52	31.5489		1338.52	31.5489	1338.52	31.5489	1330.9	27.7105	0.569413	3.12702
54	107.403	6760.48	2.99813	0.0877735	0.546461	2.80422	1.65115	0.231711	1.5581	0.943645	1343.46	37.0346		1356.66	24.2236	1377.52	20.5923		1377.52	20.5923	1377.52	20.5923	1343.46	37.0346	2.47211	3.05837
84	302.221	20903.2	1.73949	0.0869478	0.66718	2.77872	2.20446	0.231784	2.10107	0.953102	1343.84	49.9536		1349.83	32.2645	1359.32	25.2032		1359.32	25.2032	1359.32	25.2032	1343.84	49.9536	1.1385	4.10667
50	44.7107	3179	2.30921	0.0872804	0.890754	2.80223	1.66124	0.232855	1.40224	0.844093	1349.45	33.4636		1356.13	24.3672	1366.67	33.6144		1366.67	33.6144	1366.67	33.6144	1349.45	33.4636	1.26047	3.44868
51	84.8668	6106.55	3.47794	0.0878506	0.68522	2.83838	1.5416	0.234328	1.38094	0.895786	1357.14	33.1242		1365.74	22.6881	1379.2	25.8146		1379.2	25.8146	1379.2	25.8146	1357.14	33.1242	1.59934	3.02658
13	144.795	9156.58	2.36303	0.0889405	0.548154	2.89634	1.5542	0.236183	1.45432	0.935739	1366.82	35.1077		1380.96	22.9934	1402.86	20.582		1402.86	20.582	1402.86	20.582	1366.82	35.1077	2.56878	2.88205
100	156.917	10831.4	2.22123	0.0857772	0.535521	2.79987	2.32725	0.236736	2.26479	0.973165	1369.71	54.7763		1355.5	34.1303	1333.15	20.3046		1333.15	20.3046	1333.15	20.3046	1369.71	54.7763	-2.74208	4.39668
90	136.838	10011.9	2.14664	0.0881288	0.674411	2.91538	2.78667	0.239925	2.70383	0.970273	1386.31	66.1056		1385.91	41.3005	1385.28	25.3835		1385.28	25.3835	1385.28	25.3835	1386.31	66.1056	-0.0745033	5.11222
46	49.321	4027.09	2.36684	0.0917859	0.706113	3.08774	2.28312	0.243985	2.17118	0.950972	1407.38	53.8049		1429.65	34.3254	1462.94	26.2985		1462.94	26.2985	1462.94	26.2985	1407.38	53.8049	3.79786	4.06415
3	233.792	16590.3	2.04941	0.0901221	0.522974	3.04172	1.95403	0.244786	1.88275	0.96352	1411.53	46.7801		1418.16	29.2686	1428.1	19.5693		1428.1	19.5693	1428.1	19.5693	1411.53	46.7801	1.16036	3.54465
70	215.594	16141.9	1.08945	0.0926333	1.25601	3.15	1.71943	0.246628	1.17425	0.68293	1421.06	29.3522		1445	25.9751	1480.38	46.6708		1480.38	46.6708	1480.38	46.6708	1421.06	29.3522	4.00727	3.61796
67	127.742	9285.5	2.47156	0.0882786	0.556623	3.00438	2.79599	0.24683	2.74003	0.979983	1422.11	68.5368		1408.73	41.7547	1388.54	20.9408		1388.54	20.9408	1388.54	20.9408	1422.11	68.5368	-2.41778	5.17193
1	135.315	9517.43	1.96541	0.0919615	0.883002	3.13809	1.37248	0.24749	1.05072	0.765562	1425.52	26.3379		1442.08	20.7144	1466.57	32.8707		1466.57	32.8707	1466.57	32.8707	1425.52	26.3379	2.79918	2.82337
5	78.6541	5482.24	1.31372	0.0932398	0.614231	3.26907	2.64882	0.254285	2.57662	0.972742	1460.54	66.0015		1473.72	40.3728	1492.75	22.7851		1492.75	22.7851	1492.75	22.7851	1460.54	66.0015	2.15772	4.66689
35	134.567	9898.4	2.11615	0.0924587	0.689988	3.24429	2.38602	0.25449	2.28408	0.957275	1461.59	58.5453		1467.81	36.3014	1476.81	25.6501		1476.81	25.6501	1476.81	25.6501	1461.59	58.5453	1.03032	4.32096
39	100.363	7137.4	2.28106	0.0924712	0.575574	3.24763	2.15219	0.254718	2.0738	0.963575	1462.76	53.1932		1468.61	32.7511	1477.06	21.396		1477.06	21.396	1477.06	21.396	1462.76	53.1932	0.968328	3.87648
14	173.427	11511	3.08619	0.0918266	0.513836	3.36501	2.2835	0.265776	2.22493	0.974354	1519.33	59.0274		1496.29	35.0374	1463.78	19.135		1463.78	19.135	1463.78	19.135	1463.78	19.135	-3.79455	4.25467
80	134.904	9180.47	3.0623	0.0916644	0.887757	3.23327	2.36873	0.255823	2.19608	0.927113	1468.44	56.5245		1465.17	36.0093	1460.43	33.075		1460.43	33.075	1460.43	33.075	1468.44	56.5245	-0.548588	4.49062
73	83.9832	6107.34	2.10316	0.0919583	0.783954	3.24586	2.27601	0.255998	2.13673	0.938807	1469.34	55.0269		1468.19	34.6312	1466.51	29.1837		1466.51	29.1837	1466.51	29.1837	1469.34	55.0269	-0.192894	4.24909
16	102.74	7917.29	2.14085	0.0919833	0.549712	3.25595	3.37755	0.256725	3.33252	0.986667	1473.06	86.0164		1470.6	51.4359	1467.02	20.4621		1467.02	20.4621	1467.02	20.4621	1473.06	86.0164	-0.411781	6.02828
72	154.868	12675.1	2.71477	0.0916303	0.831764	3.2459	2.69118	0.256918	2.55942	0.951039	1474.05	66.1008		1468.2	40.9501	1459.72	30.9918		1459.72	30.9918	1459.72	30.9918	1474.05	66.1008	-0.982132	5.01023
20	422.683	27756.8	4.16313	0.0920425	0.932597	3.26954	1.57089	0.257631	1.26411	0.804707	1477.71	32.7193		1473.84	23.9419	1468.24	34.7092		1468.24	34.7092	1468.24	34.7092	1477.71	32.7193	-0.644505	3.25987
96	125.608	9725.33	2.62427	0.09181	0.724225	3.27054	2.48764	0.258361	2.37988	0.956684	1481.45	61.7383		1474.07	37.9194	1463.44	26.9713		1463.44	26.9713	1463.44	26.9713	1481.45	61.7383	-1.23071	4.61284
95	158.082	11060.3	3.4417	0.0929704	0.686665	3.37974	3.22762	0.263656	3.15373	0.977107	1508.52	83.1407		1499.71	49.5785	1487.27	25.4908		1487.27	25.4908	1487.27	25.4908	1487.27	25.4908	-1.42888	5.85424
25	116.27	8813.71	2.15601	0.0939587	0.860831	3.39309	1.28683	0.261913	0.956502	0.743302	1499.62	25.0835		1502.8	19.7809	1507.27	31.8683		1507.27	31.8683	1507.27	31.8683	1499.62	25.0835	0.507271	2.68226
78	111.28	8754.65	2.7697	0.0985579	0.842207	3.78312	2.28716	0.278393	2.12645	0.929734	1583.26	58.5095		1589.17	36.0055	1597	30.8161		1597	30.8161	1597	30.8161	1597	30.8161	0.860132	4.1331
36	100.835	8540.78	1.22209	0.100782	0.588926	3.98298	1.84176	0.286631	1.74507	0.947498	1624.67	49.1199		1630.73	29.3002	1638.55	21.4331		1638.55	21.4331	1638.55	21.4331	1638.55	21.4331	0.846864	3.26631
88	84.1852	7031.14	1.38567	0.100818	0.967516	4.2154	1.97848	0.303249	1.72578	0.872273	1707.4	50.7379		1677.02	31.8278	1639.21	35.2088		1639.21	35.2088	1639.21	35.2088	1639.21	35.2088	-4.15986	3.81917
47	24.63	1975.06	1.18616	0.101022	1.24958	3.97169	3.44364	0.28514	3.20893	0.931841	1617.2	89.9599		1628.43	54.7627	1642.96	45.4457		1642.96	45.4457	1642.96	45.4457	1642.96	45.4457	1.56801	6.11507
29	121.901	10149.1	1.18809	0.101441	0.934202	4.14084	4.12203	0.296056	4.01477	0.973979	1671.72	115.877		1662.4	66.1014	1650.64	33.9432		1650.64	33.9432	1650.64	33.9432	1650.64	33.9432	-1.27729	7.32254
83	63.1577	4884.95	1.36353	0.101652	0.761356	4.25136	2.31186	0.303326	2.1829	0.944216	1707.78	64.1902		1684	37.2525	1654.49	27.6486		1654.49	27.6486	1654.49	27.6486	1654.49	27.6486	-3.22125	4.24594
86	169.161	15230.1	1.2066	0.101715	0.593757	4.04557	2.01083	0.288466	1.92117	0.955411	1633.86	54.3457		1643.41	32.09	1655.63	21.5582		1655.63	21.5582	1655.63	21.5582	1655.63	21.5582	1.31504	3.52503
15	188.958	12979.4	0.813292	0.101861	0.501466	4.03214	2.05452	0.287096	1.99238	0.969755	1627	56.1521		1640.7	32.7657	1658.29	18.2006		1658.29	18.2006	1658.29	18.2006	1658.29	18.2006	1.88662	3.55326
26	58.0558	4865.55	1.37849	0.101919	0.942164	4.00431	2.77395	0.284951	2.60905	0.940553	1616.25	73.1046		1635.07	44.1814	1659.35	34.1945		1659.35	34.1945	1659.35	34.1945	1659.35	34.1945	2.59726	4.84132
17	170.815	13172.5	2.28086	0.101945	0.69045	4.07808	1.23176	0.290126	1.02006	0.828128	1642.16	28.9837		1649.93	19.6872	1659.83	25.0562		1659.83	25.0562	1659.83	25.0562	1659.83	25.0562	1.06444	2.29776
69	89.2324	6028.06	1.07203	0.102105	0.794858	4.2717	3.60593	0.303425	3.51724	0.975403	1708.27	103.455		1687.92	58.1671	1662.72	28.8351		1662.72	28.8351	1662.72	28.8351	1662.72	28.8351	-2.73933	6.47209
24	100.95	8851.33	1.9764	0.103768	0.829039	4.22431	2.88853	0.295252	2.767	0.957927	1667.72	79.6944		1678.76	46.4909	1692.56	29.9613		1692.56	29.9613	1692.56	29.9613	1692.56	29.9613	1.46732	5.02119
75	55.1959	4276.46	2.11	0.103768	3.7963	4.20757	4.53709	0.294081	2.48463	0.547625	1661.89	71.3421		1675.5	72.9886	1692.57	137.251		1692.57	137.251	1692.57	137.251	1692.57	137.251	1.81231	9.00894
97	127.743	10702	2.17174	0.104719	0.534064	4.37884	1.78827	0.303271	1.70666	0.954363	1707.51	50.1787		1708.36	28.9748	1709.37	19.2587		1709.37	19.2587	1709.37	19.2587	1709.37	19.2587	0.108985	3.14384
62	150.802	12208.3	1.5321	0.104863	0.60283	4.41106	3.02621	0.305084	2.96556	0.979958	1716.47	87.593		1714.42	49.1059	1711.89	21.732		1711.89	21.732	1711.89	21.732	1711.89	21.732	-0.267452	5.27268
68	182.239	17341	3.40639	0.106335	0.70229	4.50633	3.03731	0.307358	2.955	0.972901	1727.69	87.7787		1732.14	49.4795	1737.5	25.2368		1737.5	25.2368	1737.5	25.2368	1737.5	25.2368	0.56453	5.2544
22	158.873	12256.2	1.83541	0.106735	0.796267	4.4604	2.24126	0.303085	2.09505	0.934762	1706.59	61.5691		1723.63	36.4399	1744.38	28.5898		1744.38	28.5898	1744.38	28.5898	1744.38	28.5898	2.16676	3.87671
10	218.574	22139.3	2.5025	0.10754	0.607471	4.73493	2.30326	0.319332	2.22171	0.964593	1786.47	67.9445		1773.44	37.8501	1758.13	21.7764		1758.13	21.7764	1758.13	21.7764	1758.13	21.7764	-1.61206	4.06438
76	107.546	9965.31	1.56379	0.107736	0.591968	4.83803	2.76129	0.325692	2.69709	0.97675	1817.47	83.722		1791.54	45.5486	1761.46	21.2118		1761.46	21.2118	1761.46	21.2118	1761.46	21.2118	-3.1797	4.91272
81	279.021	23834	2.65578	0.107773	0.706083	4.77687	1.90218	0.321463	1.76627	0.928554	1796.87	54.2889		1780.84	31.3057	1762.09	25.299		1762.09	25.299	1762.09	25.299	1762.09	25.299	-1.97369	3.41111
31	28.5303	2205.45	1.59164	0.108686	2.76193	4.42375	5.21914	0.2952	4.42845	0.848502	1667.46	127.532		1716.8	84.7693	1777.49	98.779		1777.49	98.779	1777.49	98.779	1777.49	98.779	6.19015	8.86882
37	48.209	4647.44	2.56742	0.114373	0.530112	5.26243	1.70356	0.333703	1.61898	0.950351	1856.31	51.1821		1862.79	28.4915	1870.02	18.7449		1870.02	18.7449	1870.02	18.7449	1870.02	18.7449	0.73315	2.91225
65	116.987	10426.9	0.506114	0.115145	0.924451	5.25096	2.11968	0.330745	1.90746	0.899885	1841.99	59.9008		1860.93	35.44	1882.13	32.6379		1882.13	32.6379	1882.13	32.6379	1882.13	32.6379	2.13264	3.60682
71	146.642	15094.4	0.741849	0.116426	0.890341	5.24634	4.57664	0.326817	4.4892	0.980894	1822.93	139.718		1860.18	76.538	1902.05	31.3587		1902.05	31.3587	1902.05	31.3587	1902.05	31.3587	4.15939	7.51371
66	75.2934	10751	1.31965	0.184751	0.50962	12.7523	1.37749	0.500609	1.27975	0.929047	2616.41	53.9429		2661.53	25.4221	2695.98	16.4946		2695.98	16.4946	2695.98	16.4946	2695.98	16.4946	2.95114	2.08711
Rejected Analyses (>10% discordant; >5% reverse discordant; >10% 2σ uncertainty)
32	98.788	5161.23	1.45522	0.0750903	0.60724	1.95425	5.9988	0.188753	5.96799	0.994863	1114.62	119.734	x	1099.91	79.0153	1070.94	23.8778		1070.94	23.8778	1114.62	119.734	1114.62	119.734	-4.07854	11.4186			x
42	115.955	6872.47	2.8232	0.0816989	0.64434	2.64168	1.16567	0.234511	0.971396	0.833338	1358.1	23.3152		1312.33	16.8287	1238.33	24.7951		1238.33	24.7951	1238.33	24.7951	1358.1	23.3152	-9.67192	2.89261		x	x
77	84.8377	4199.21	6.28008	0.0830532	3.97332	2.69529	4.11358	0.235368	1.06503	0.258906	1362.57	25.6383		1327.17	59.7301	1270.48	152.039	x	1270.48	152.039	1270.48	152.039	1362.57	25.6383	-7.24827	12.9921			x
11	78.7835	3785.99	2.40418	0.0904795	5.79053	2.65769	6.65601	0.213036	3.28211	0.493104	1244.97	72.8301		1316.78	96.3244	1435.65	216.636	x	1435.65	216.636	1435.65	216.636	1244.97	72.8301	13.2819	14.0345			x
49	434.375	21005.4	1.378	0.0923666	0.881545	2.71174	9.346	0.212927	9.30433	0.995542	1244.39	206.393	x	1331.67	136.1	1474.92	32.7797		1474.92	32.7797	1474.92	32.7797	1244.39	206.393	15.6295	14.1186			x
82	276.172	7726.64	1.36836	0.0838121	0.97705	1.00208	26.5017	0.0867147	26.4837	0.99932	536.078	267.051	x	704.863	265.55	1288.18	37.2793		536.078	267.051	536.078	267.051	536.078	267.051	58.3848	20.7659	x		x
7	152.56	2113.73	1.26608	0.0825475	8.20398	0.154844	294.027	0.0136047	293.913	0.999611	87.1105	498.7	x	146.18	829.513	1258.56	314.814	x	87.1105	498.7	87.1105	498.7	87.1105	498.7	93.0785	39.6626	x		x
J1708-104.9, Shell Creek Fm, Coal Creek inlier (Cambrian), University of Arizona, n=279/315
166	216.854	19315.5	1.6264	0.0583268	0.975979	0.669435	1.65532	0.0832776	1.33699	0.807694	515.657	12.9865		520.369	13.2103	541.087	41.8314		515.657	12.9865	515.657	12.9865	515.657	12.9865	4.69979	7.74873
74	87.9611	807060	1.59437	0.0739075	1.15812	1.58761	1.42658	0.155863	0.833008	0.583918	933.747	14.1926		965.361	17.4197	1038.05	45.8707		1038.05	45.8707	933.747	14.1926	933.747	14.1926	10.0476	4.20351
60	19.0416	3641.31	0.766186	0.0695069	1.80515	1.53249	2.08026	0.159977	1.03389	0.496998	956.652	18.0159		943.498	25.054	912.944	72.8273		912.944	72.8273	956.652	18.0159	956.652	18.0159	-4.7875	8.58888
91	546.197	113844	1.82609	0.0739863	0.547326	1.63925	1.33078	0.160761	1.21302	0.911509	961.006	21.2267		985.424	16.4501	1040.2	21.6916		1040.2	21.6916	961.006	21.2267	961.006	21.2267	7.61304	2.80641
238	49.3319	69110.5	0.818157	0.0759009	0.917488	1.72495	1.3588	0.164899	1.00228	0.737618	983.944	17.9263		1017.87	17.1187	1091.61	35.983		1091.61	35.983	983.944	17.9263	983.944	17.9263	9.86274	3.39485
190	696.185	25918.7	1.65257	0.0781249	0.50922	1.8327	1.34041	0.170212	1.23992	0.925029	1013.28	22.7873		1057.25	17.2594	1149.17	19.8207		1149.17	19.8207	1013.28	22.7873	1013.28	22.7873	11.8252	2.49899
212	88.5388	27785.6	1.19588	0.074294	0.887029	1.75492	1.17287	0.171392	0.767341	0.65424	1019.78	14.1857		1028.98	14.8694	1048.6	35.0867		1048.6	35.0867	1019.78	14.1857	1019.78	14.1857	2.74915	3.52406
141	450.976	437603	1.6303	0.0741309	0.726419	1.76517	1.15204	0.172772	0.894158	0.77615	1027.37	16.6437		1032.75	14.6361	1044.18	28.7596		1044.18	28.7596	1027.37	16.6437	1027.37	16.6437	1.6097	3.14397
48	238.52	1.64054e+06	3.05979	0.0732895	0.606762	1.74884	1.12392	0.173139	0.94606	0.841752	1029.38	17.6417		1026.73	14.2308	1021.07	24.074		1021.07	24.074	1029.38	17.6417	1029.38	17.6417	-0.814366	2.93853
150	70.0253	93922.3	1.07219	0.0744461	0.81368	1.77971	1.24504	0.173458	0.942369	0.756896	1031.14	17.6004		1038.07	15.8646	1052.73	32.1684		1052.73	32.1684	1031.14	17.6004	1031.14	17.6004	2.05093	3.42834
47	149.432	117325	2.40201	0.0725568	0.90303	1.75079	1.37207	0.175083	1.03302	0.752887	1040.06	19.4472		1027.46	17.3801	1000.7	35.929		1000.7	35.929	1040.06	19.4472	1040.06	19.4472	-3.93324	4.20733
180	269.816	98212.9	1.33632	0.0746272	0.779066	1.80485	1.18277	0.175481	0.889938	0.752421	1042.24	16.7861		1047.21	15.1469	1057.62	30.7789		1057.62	30.7789	1042.24	16.7861	1042.24	16.7861	1.45418	3.27778
182	92.4773	35340	1.5252	0.0749222	0.897963	1.8219	1.29069	0.176442	0.927112	0.718309	1047.51	17.5687		1053.37	16.5844	1065.56	35.3893		1065.56	35.3893	1047.51	17.5687	1047.51	17.5687	1.69388	3.65764
30	51.8949	375754	0.817185	0.0788909	1.37554	1.91973	1.79969	0.176563	1.1605	0.644834	1048.17	22.0042		1087.97	23.5505	1168.55	53.3749		1168.55	53.3749	1048.17	22.0042	1048.17	22.0042	10.3017	4.50907
263	67.7129	15062	1.60455	0.0761791	1.03284	1.85773	1.4039	0.176944	0.950879	0.677315	1050.26	18.0626		1066.18	18.1633	1098.89	40.4905		1098.89	40.4905	1050.26	18.0626	1050.26	18.0626	4.42594	3.8863
10	197.036	34817.4	2.05928	0.0751093	0.736302	1.84717	1.16358	0.178444	0.900984	0.774322	1058.47	17.2379		1062.42	15.0239	1070.57	28.9963		1070.57	28.9963	1058.47	17.2379	1058.47	17.2379	1.13078	3.12466
174	43.478	41593.6	2.06944	0.0762248	1.08996	1.89064	1.5035	0.17997	1.03561	0.688802	1066.81	19.9573		1077.81	19.5713	1100.13	42.7545		1100.13	42.7545	1066.81	19.9573	1066.81	19.9573	3.02874	4.1825
202	778.146	94612.9	3.80597	0.0752109	0.477165	1.8693	1.15504	0.180337	1.05187	0.910678	1068.82	20.3056		1070.28	14.9759	1073.29	18.7704		1073.29	18.7704	1068.82	20.3056	1068.82	20.3056	0.416532	2.57146
1	64.0598	24274.4	0.945518	0.0771911	1.01218	1.9222	1.56144	0.180684	1.18895	0.761443	1070.71	22.9892		1088.83	20.4416	1125.25	39.5262		1125.25	39.5262	1070.71	22.9892	1070.71	22.9892	4.84651	3.91738
137	409.91	129121	4.1191	0.0762425	0.639199	1.90436	1.00545	0.181234	0.776116	0.771909	1073.71	15.0454		1082.61	13.1205	1100.56	25.0609		1100.56	25.0609	1073.71	15.0454	1073.71	15.0454	2.43925	2.6085
128	137.841	158495	1.66953	0.0751922	0.870245	1.88144	1.23993	0.181554	0.883238	0.712326	1075.46	17.1476		1074.57	16.1129	1072.79	34.224		1072.79	34.224	1075.46	17.1476	1075.46	17.1476	-0.249033	3.57534
104	852.635	665584	3.53259	0.0754944	0.605256	1.89582	1.19083	0.182209	1.02554	0.861201	1079.03	19.9711		1079.62	15.5156	1080.8	23.8004		1080.8	23.8004	1079.03	19.9711	1079.03	19.9711	0.163995	2.87189
265	99.4498	65838.2	1.87481	0.076051	0.78869	1.91092	1.26415	0.182317	0.98795	0.781513	1079.62	19.2487		1084.91	16.5161	1095.52	30.9282		1095.52	30.9282	1079.62	19.2487	1079.62	19.2487	1.4519	3.29052
153	782.103	127025	1.26449	0.0767624	0.631213	1.93854	1.31882	0.183238	1.15795	0.878022	1084.64	22.6573		1094.5	17.3151	1114.17	24.6904		1114.17	24.6904	1084.64	22.6573	1084.64	22.6573	2.65089	2.96466
211	78.1394	11333	1.46806	0.0750876	0.844551	1.90573	1.34669	0.184154	1.04896	0.778915	1089.63	20.6113		1083.09	17.5781	1069.99	33.2485		1069.99	33.2485	1089.63	20.6113	1089.63	20.6113	-1.83498	3.70458
9	140.658	30015.5	1.9279	0.0775612	0.855253	1.97666	1.34463	0.184916	1.03758	0.771647	1093.78	20.4589		1107.58	17.7706	1134.81	33.3263		1134.81	33.3263	1093.78	20.4589	1093.78	20.4589	3.61581	3.35593
264	128.6	83609.5	1.40303	0.0775956	0.813205	1.9785	1.22794	0.185006	0.920078	0.749283	1094.27	18.1495		1108.21	16.2335	1135.69	31.7011		1135.69	31.7011	1094.27	18.1495	1094.27	18.1495	3.64729	3.12852
291	50.7245	31256.4	0.703403	0.0767584	0.735586	1.96304	1.23027	0.185563	0.986138	0.801564	1097.3	19.502		1102.93	16.2213	1114.07	28.7818		1114.07	28.7818	1097.3	19.502	1097.3	19.502	1.5057	3.08856
233	55.8067	91042.6	2.12032	0.0802436	1.17816	2.07156	1.52886	0.187316	0.974352	0.637306	1106.82	19.4223		1139.45	20.5215	1202.1	45.4739		1202.1	45.4739	1106.82	19.4223	1106.82	19.4223	7.92643	3.83951
125	388.657	161658	3.27631	0.0787445	0.57606	2.03782	1.00727	0.187773	0.826289	0.820323	1109.3	16.5047		1128.23	13.4476	1164.84	22.4095		1164.84	22.4095	1109.3	16.5047	1109.3	16.5047	4.76789	2.31608
268	218.243	82353.6	2.70905	0.076957	0.784803	2.01135	1.36089	0.189639	1.11181	0.816968	1119.42	22.3932		1119.35	18.0904	1119.22	30.6851		1119.22	30.6851	1119.42	22.3932	1119.42	22.3932	-0.0174943	3.39446
311	108.728	32423	2.34321	0.0766966	0.78846	2.00729	1.2078	0.189898	0.914934	0.757523	1120.82	18.4491		1117.98	16.0444	1112.42	30.861		1112.42	30.861	1120.82	18.4491	1120.82	18.4491	-0.755009	3.25014
193	119.938	471610	2.45768	0.0772136	0.906468	2.0229	1.24658	0.190094	0.855732	0.686464	1121.88	17.2703		1123.23	16.6022	1125.86	35.4227		1125.86	35.4227	1121.88	17.2703	1121.88	17.2703	0.353332	3.4903
22	165.411	261950	2.56266	0.0799173	0.794339	2.10091	1.09026	0.190745	0.746788	0.684963	1125.41	15.115		1149.1	14.7008	1194.07	30.686		1194.07	30.686	1125.41	15.115	1125.41	15.115	5.75001	2.73292
252	81.3173	116940	2.84028	0.0785948	0.991133	2.09499	1.39614	0.193408	0.983293	0.704293	1139.81	20.1346		1147.16	18.8083	1161.07	38.5502		1161.07	38.5502	1139.81	20.1346	1139.81	20.1346	1.83056	3.69207
97	142.461	36324.2	1.83478	0.0801919	0.720008	2.13768	1.16742	0.19342	0.918944	0.787158	1139.87	18.8179		1161.07	15.8291	1200.83	27.7824		1200.83	27.7824	1139.87	18.8179	1139.87	18.8179	5.07653	2.69792
108	924.969	272500	3.53057	0.0797431	0.549346	2.12883	1.14693	0.193702	1.00681	0.877831	1141.4	20.6425		1158.21	15.5307	1189.76	21.221		1189.76	21.221	1141.4	20.6425	1141.4	20.6425	4.06502	2.43684
67	140.214	38513.8	1.65728	0.0789848	0.668725	2.11309	1.18056	0.194117	0.972901	0.824099	1143.64	19.9829		1153.09	15.9482	1170.91	25.985		1170.91	25.985	1143.64	19.9829	1143.64	19.9829	2.32925	2.75875
304	150.369	84673.5	1.7696	0.0775603	0.916551	2.07709	1.34267	0.194314	0.981176	0.730763	1144.7	20.17		1141.27	18.0378	1134.79	35.7174		1134.79	35.7174	1144.7	20.17	1144.7	20.17	-0.873742	3.63867
309	120.858	68152.7	2.53761	0.0788489	0.815479	2.12211	1.22284	0.195281	0.911223	0.74517	1149.92	18.81		1156.02	16.5419	1167.46	31.6946		1167.46	31.6946	1149.92	18.81	1149.92	18.81	1.50279	3.12191
269	130.151	24151.1	6.27009	0.0820867	0.80472	2.21675	1.16526	0.195944	0.842763	0.723242	1153.49	17.4462		1186.34	15.9815	1246.75	30.8508		1246.75	30.8508	1153.49	17.4462	1153.49	17.4462	7.48012	2.68318
124	346.583	1.50911e+06	2.81766	0.0782024	0.782834	2.11261	1.20407	0.196014	0.914851	0.759799	1153.87	18.9442		1152.93	16.2645	1151.14	30.4283		1151.14	30.4283	1153.87	18.9442	1153.87	18.9442	-0.237688	3.11909
191	241.021	61159.7	4.70853	0.0766583	0.813272	2.07155	1.25217	0.196076	0.952115	0.760371	1154.21	19.7211		1139.45	16.8073	1111.43	31.8574		1111.43	31.8574	1154.21	19.7211	1154.21	19.7211	-3.84917	3.46542
289	283.8	62269.6	1.73794	0.078442	0.626634	2.12391	1.03906	0.196461	0.828837	0.797681	1156.28	17.1958		1156.61	14.0595	1157.21	24.4006		1157.21	24.4006	1156.28	17.1958	1156.28	17.1958	0.0802368	2.57819
292	150.822	41530.7	2.93451	0.0781985	0.770517	2.11922	1.22221	0.196637	0.948742	0.776249	1157.23	19.6982		1155.08	16.5262	1151.04	29.95		1151.04	29.95	1157.23	19.6982	1157.23	19.6982	-0.538088	3.12605
133	307.411	122664	9.06545	0.0797705	0.760391	2.17092	1.36413	0.197464	1.13254	0.830231	1161.68	23.5968		1171.77	18.5871	1190.48	29.4205		1190.48	29.4205	1161.68	23.5968	1161.68	23.5968	2.419	3.12159
221	88.274	90746	1.94443	0.0803631	0.918217	2.19749	1.33003	0.198407	0.962211	0.723452	1166.76	20.1279		1180.25	18.1918	1205.07	35.4171		1205.07	35.4171	1166.76	20.1279	1166.76	20.1279	3.17969	3.29953
161	324.472	169105	1.70223	0.0792626	0.628947	2.17424	1.06233	0.199034	0.856132	0.805903	1170.13	17.9561		1172.84	14.4817	1177.86	24.4158		1177.86	24.4158	1170.13	17.9561	1170.13	17.9561	0.656175	2.56217
118	47.3032	14398	2.10595	0.0802065	0.845228	2.20261	1.41807	0.199258	1.13864	0.802953	1171.33	23.9037		1181.87	19.4102	1201.19	32.6516		1201.19	32.6516	1171.33	23.9037	1171.33	23.9037	2.48596	3.31455
101	206.018	98719.8	2.30511	0.0791595	0.642312	2.19148	1.10066	0.200873	0.893803	0.812062	1180.01	18.8904		1178.34	15.0415	1175.28	24.9416		1175.28	24.9416	1180.01	18.8904	1180.01	18.8904	-0.402013	2.66896
168	91.7609	10928.1	2.91724	0.0775742	0.772543	2.14846	1.25348	0.200955	0.987114	0.787498	1180.45	20.8696		1164.56	17.0233	1135.14	30.1084		1135.14	30.1084	1180.45	20.8696	1180.45	20.8696	-3.99121	3.31482
105	183.335	1.06519e+06	2.25996	0.0803909	0.564944	2.24492	0.872134	0.20262	0.664421	0.761834	1189.38	14.144		1195.2	12.008	1205.76	21.7939		1205.76	21.7939	1189.38	14.144	1189.38	14.144	1.3584	2.13422
253	334.058	74528.7	2.54295	0.0800192	0.684982	2.23758	1.142	0.202895	0.913764	0.800143	1190.85	19.4739		1192.9	15.7079	1196.58	26.4639		1196.58	26.4639	1190.85	19.4739	1190.85	19.4739	0.478959	2.73736
93	22.6209	118000	1.73229	0.0817599	1.0215	2.29199	1.71615	0.203404	1.37903	0.803559	1193.58	29.4507		1209.82	23.7802	1238.94	39.2507		1238.94	39.2507	1193.58	29.4507	1193.58	29.4507	3.6609	3.86858
58	42.8673	9840.45	3.37789	0.0785461	1.17713	2.20386	1.63717	0.203585	1.13784	0.695004	1194.55	24.3179		1182.27	22.4134	1159.84	45.7492		1159.84	45.7492	1194.55	24.3179	1194.55	24.3179	-2.99287	4.57163
138	113.381	84187.1	1.91098	0.0789804	0.748378	2.21841	1.46553	0.203803	1.26004	0.859787	1195.72	26.9535		1186.87	20.1046	1170.8	29.0745		1170.8	29.0745	1195.72	26.9535	1195.72	26.9535	-2.12805	3.42519
314	95.3232	22728.7	1.34557	0.0784335	0.793156	2.20558	1.12498	0.204037	0.797793	0.709165	1196.97	17.0818		1182.81	15.4047	1156.99	30.8628		1156.99	30.8628	1196.97	17.0818	1196.97	17.0818	-3.45524	3.12978
297	117.493	52603.1	3.10086	0.0797303	0.817214	2.2465	1.15738	0.204442	0.81957	0.708124	1199.14	17.577		1195.69	15.9391	1189.45	31.6256		1189.45	31.6256	1199.14	17.577	1199.14	17.577	-0.814832	3.06087
207	44.8113	16496.2	1.95503	0.0854581	1.36687	2.41886	1.87852	0.205374	1.28861	0.685969	1204.12	27.7408		1248.22	26.4519	1325.09	51.8827		1325.09	51.8827	1325.09	51.8827	1204.12	27.7408	9.12914	4.12817
33	135.59	85689	0.577047	0.0823475	0.790726	2.35428	1.33208	0.207441	1.072	0.804757	1215.17	23.2701		1228.85	18.6074	1252.96	30.3535		1252.96	30.3535	1252.96	30.3535	1215.17	23.2701	3.01584	2.99488
187	145.508	90584.1	1.80929	0.082646	0.702156	2.38871	1.11822	0.209715	0.870282	0.778275	1227.3	19.0626		1239.22	15.6874	1260.04	26.8993		1260.04	26.8993	1260.04	26.8993	1227.3	19.0626	2.59806	2.57146
271	202.172	113973	3.1004	0.0814622	0.640396	2.3624	1.01087	0.210419	0.782145	0.773735	1231.05	17.1795		1231.31	14.1349	1231.78	24.6674		1231.78	24.6674	1231.78	24.6674	1231.05	17.1795	0.0592473	2.43942
214	246.631	342710	2.28929	0.0840761	0.545207	2.44276	1.13561	0.210812	0.996169	0.877213	1233.14	21.9143		1255.29	16.036	1293.45	20.7855		1293.45	20.7855	1293.45	20.7855	1233.14	21.9143	4.66245	2.28422
57	329.453	81707	5.39233	0.0805482	0.550457	2.35291	0.793909	0.211952	0.572092	0.720601	1239.21	12.6413		1228.44	11.0878	1209.58	21.2379		1209.58	21.2379	1209.58	21.2379	1239.21	12.6413	-2.44948	2.08038
46	1243.86	193103	2.19445	0.0843332	0.616961	2.47448	1.1988	0.212899	1.02785	0.8574	1244.24	22.7956		1264.6	16.9917	1299.39	23.5016		1299.39	23.5016	1299.39	23.5016	1244.24	22.7956	4.24392	2.4652
77	195.185	38442	2.18193	0.0824208	0.693638	2.45122	1.32287	0.215791	1.12643	0.851507	1259.6	25.2613		1257.78	18.6993	1254.7	26.5893		1254.7	26.5893	1254.7	26.5893	1259.6	25.2613	-0.390278	2.92908
3	15.5111	6233.31	1.3405	0.0848848	1.75937	2.55184	2.11379	0.218128	1.17164	0.554282	1271.98	26.5085		1286.96	30.226	1312.05	66.9066		1312.05	66.9066	1312.05	66.9066	1271.98	26.5085	3.05402	5.34059
201	305.892	80567.2	2.81013	0.0808208	0.560257	2.43348	1.2243	0.21847	1.08858	0.88915	1273.78	24.6612		1252.55	17.2694	1216.25	21.5965		1216.25	21.5965	1216.25	21.5965	1273.78	24.6612	-4.73027	2.75129
98	268.078	81823.7	3.49752	0.0831084	0.575324	2.50732	0.945198	0.218903	0.749934	0.793415	1276.08	17.0169		1274.15	13.4477	1270.93	21.9692		1270.93	21.9692	1270.93	21.9692	1276.08	17.0169	-0.405183	2.19204
244	852.002	376570	2.18895	0.0846069	0.465136	2.56532	1.07401	0.22	0.968061	0.901354	1281.88	22.0567		1290.81	15.3796	1305.68	17.7004		1305.68	17.7004	1305.68	17.7004	1281.88	22.0567	1.82303	2.1506
229	295.596	22567.2	2.38811	0.0898085	0.805117	2.73367	1.16312	0.220859	0.839424	0.721701	1286.41	19.1869		1337.66	16.9485	1420.61	30.1579		1420.61	30.1579	1420.61	30.1579	1286.41	19.1869	9.44646	2.34937
235	500.307	90378.7	1.37139	0.0842252	0.609041	2.57464	1.14808	0.221801	0.973215	0.847692	1291.38	22.3227		1293.46	16.457	1296.9	23.209		1296.9	23.209	1296.9	23.209	1291.38	22.3227	0.425134	2.47752
96	357.702	151517	2.78424	0.084723	0.386835	2.6065	1.29898	0.223226	1.24005	0.954629	1298.9	28.5924		1302.47	18.6842	1308.34	14.7195		1308.34	14.7195	1308.34	14.7195	1298.9	28.5924	0.722017	2.45427
29	29.8867	15579.8	2.3235	0.0861882	1.19937	2.65178	1.62374	0.223243	1.09456	0.674096	1298.99	25.2394		1315.14	23.4669	1341.55	45.4209		1341.55	45.4209	1341.55	45.4209	1298.99	25.2394	3.17257	3.77978
218	80.233	23414.6	3.22538	0.0845557	0.966326	2.61075	1.33968	0.224032	0.927874	0.69261	1303.14	21.4576		1303.67	19.2782	1304.51	36.7842		1304.51	36.7842	1304.51	36.7842	1303.14	21.4576	0.104457	3.26193
123	41.0432	6.09113e+06	2.73875	0.0865657	0.885737	2.67812	1.41012	0.224477	1.09723	0.778111	1305.49	25.4152		1322.44	20.4344	1349.99	33.5041		1349.99	33.5041	1349.99	33.5041	1305.49	25.4152	3.29637	3.05029
260	204.326	55048.3	1.51968	0.0896015	0.587789	2.77288	1.06684	0.224545	0.890305	0.834529	1305.85	20.6273		1348.26	15.6045	1416.2	22.0303		1416.2	22.0303	1416.2	22.0303	1305.85	20.6273	7.79226	2.04424
175	42.1011	11403	1.64738	0.0882997	0.850012	2.75668	1.41441	0.226524	1.13051	0.799276	1316.26	26.3807		1343.9	20.6567	1388.16	31.9805		1388.16	31.9805	1388.16	31.9805	1316.26	26.3807	5.17967	2.89543
293	207.776	92097.8	0.628251	0.0852466	0.439176	2.66332	0.977218	0.226691	0.872971	0.893323	1317.13	20.3833		1318.34	14.1395	1320.29	16.6815		1320.29	16.6815	1320.29	16.6815	1317.13	20.3833	0.239279	1.99303
210	208.141	66224.4	3.27635	0.0884696	0.605766	2.77346	1.05967	0.227466	0.869452	0.820494	1321.2	20.3576		1348.42	15.5006	1391.85	22.7794		1391.85	22.7794	1391.85	22.7794	1321.2	20.3576	5.07577	2.13374
251	165.243	1.01589e+06	2.2687	0.0850058	0.703321	2.66569	1.12233	0.227535	0.874627	0.779293	1321.57	20.4839		1319	16.2432	1314.81	26.736		1314.81	26.736	1314.81	26.736	1321.57	20.4839	-0.514307	2.56997
71	230.348	85003	2.02776	0.0855045	0.612642	2.68506	1.24893	0.227852	1.08835	0.871422	1323.23	25.5181		1324.35	18.1111	1326.14	23.2502		1326.14	23.2502	1326.14	23.2502	1323.23	25.5181	0.219668	2.60057
179	51.1157	114178	1.76819	0.0851656	0.799291	2.68117	1.39286	0.228427	1.1407	0.818963	1326.25	26.8007		1323.28	20.1906	1318.45	30.3655		1318.45	30.3655	1318.45	30.3655	1326.25	26.8007	-0.591654	3.08211
31	127.399	50222.6	2.49092	0.0846179	0.782594	2.66863	1.19504	0.228831	0.90315	0.755745	1328.37	21.2499		1319.81	17.3008	1305.93	29.784		1305.93	29.784	1305.93	29.784	1328.37	21.2499	-1.71796	2.83363
240	206.143	67905.4	1.12473	0.0850838	0.633251	2.68709	1.19482	0.229152	1.01321	0.848	1330.05	23.8666		1324.91	17.33	1316.59	24.0652		1316.59	24.0652	1316.59	24.0652	1330.05	23.8666	-1.02269	2.58763
115	75.4926	34450.1	1.54577	0.0854574	0.671041	2.70144	1.12359	0.229369	0.901204	0.802072	1331.19	21.2446		1328.85	16.3204	1325.08	25.4695		1325.08	25.4695	1325.08	25.4695	1331.19	21.2446	-0.461178	2.50981
110	312.394	1.5939e+06	2.9285	0.0852237	0.525244	2.7023	1.00301	0.23007	0.85449	0.851924	1334.87	20.1935		1329.09	14.5701	1319.77	19.951		1319.77	19.951	1319.77	19.951	1334.87	20.1935	-1.14364	2.16308
139	93.2673	80173.3	2.31183	0.0857665	0.760549	2.72141	1.25404	0.230231	0.997083	0.795099	1335.71	23.5767		1334.32	18.2513	1332.06	28.8392		1332.06	28.8392	1332.06	28.8392	1335.71	23.5767	-0.273684	2.801
11	389.752	122324	2.52409	0.0868847	0.710725	2.76295	1.37652	0.230737	1.17885	0.856396	1338.36	27.9245		1345.59	20.1154	1357.08	26.8563		1357.08	26.8563	1357.08	26.8563	1338.36	27.9245	1.37939	2.83604
199	94.2274	1.78091e+06	1.21115	0.0852983	0.71355	2.74148	1.19263	0.233202	0.955624	0.801273	1351.26	22.8328		1339.78	17.3918	1321.47	27.0956		1321.47	27.0956	1321.47	27.0956	1351.26	22.8328	-2.25456	2.71687
50	296.207	51012.2	2.98574	0.0877155	0.626496	2.81947	0.985661	0.233227	0.76094	0.77201	1351.39	18.1828		1360.73	14.4806	1375.41	23.612		1375.41	23.612	1375.41	23.612	1351.39	18.1828	1.74599	2.14309
127	332.538	299596	3.32508	0.0880875	0.532821	2.83637	1.01865	0.233634	0.868185	0.852292	1353.52	20.7748		1365.21	14.9886	1383.54	20.0591		1383.54	20.0591	1383.54	20.0591	1353.52	20.7748	2.17005	2.06555
62	282.375	315807	2.34009	0.0857255	0.559358	2.76706	1.08507	0.234205	0.929782	0.856887	1356.5	22.2928		1346.7	15.8624	1331.14	21.2143		1331.14	21.2143	1331.14	21.2143	1356.5	22.2928	-1.90508	2.33286
61	155.651	91178.8	2.03954	0.0889149	0.798375	2.87643	1.13024	0.234729	0.800027	0.707837	1359.24	19.2165		1375.76	16.6913	1401.47	29.9832		1401.47	29.9832	1401.47	29.9832	1359.24	19.2165	3.01376	2.48705
53	162.962	73303.2	2.1277	0.0878629	0.674365	2.84713	1.19041	0.23512	0.980975	0.824064	1361.28	23.5947		1368.05	17.5334	1378.63	25.4049		1378.63	25.4049	1378.63	25.4049	1361.28	23.5947	1.25877	2.49798
0	152.975	79389.8	2.40986	0.0888449	0.704276	2.87975	1.0821	0.235185	0.821542	0.759212	1361.62	19.7644		1376.63	15.985	1399.97	26.4547		1399.97	26.4547	1399.97	26.4547	1361.62	19.7644	2.73908	2.31754
283	272.976	66043.2	2.94344	0.087961	0.533751	2.89926	0.944316	0.239158	0.779001	0.824937	1382.32	18.9964		1381.72	13.9738	1380.78	20.1017		1380.78	20.1017	1380.78	20.1017	1382.32	18.9964	-0.111501	2.00422
237	410.061	89336.8	4.98913	0.0881873	0.619861	2.90807	1.2357	0.239269	1.06898	0.865083	1382.9	26.0775		1384.01	18.3001	1385.71	23.329		1385.71	23.329	1385.71	23.329	1382.9	26.0775	0.203482	2.52275
197	158.862	82407.7	2.94283	0.0870879	0.678509	2.8845	1.24425	0.240325	1.04297	0.838232	1388.39	25.5336		1377.87	18.3883	1361.59	25.6233		1361.59	25.6233	1361.59	25.6233	1388.39	25.5336	-1.96853	2.68308
140	331.231	1.13726e+06	2.56353	0.0896531	0.495691	2.97525	1.0268	0.240794	0.899228	0.875757	1390.82	22.0491		1401.32	15.2947	1417.3	18.5756		1417.3	18.5756	1417.3	18.5756	1390.82	22.0491	1.86795	2.01852
273	247.921	44044.8	2.47915	0.0914796	0.656899	3.03868	1.28994	0.241017	1.11014	0.860619	1391.98	27.241		1417.39	19.3158	1455.76	24.4892		1455.76	24.4892	1455.76	24.4892	1391.98	27.241	4.38103	2.46759
163	243.757	78972.4	3.06063	0.0882814	0.550427	2.93594	0.896387	0.241305	0.707489	0.789267	1393.48	17.3773		1391.23	13.3072	1387.76	20.71		1387.76	20.71	1387.76	20.71	1393.48	17.3773	-0.41173	1.95279
259	193.265	76896.4	3.09232	0.0876072	0.702653	2.94255	1.00067	0.243709	0.712469	0.711994	1405.95	17.6398		1392.93	14.8638	1373.03	26.4937		1373.03	26.4937	1373.03	26.4937	1405.95	17.6398	-2.39741	2.35679
84	351.059	85713.5	2.30128	0.090148	0.613523	3.03068	1.15916	0.243934	0.983488	0.848446	1407.12	24.3679		1415.38	17.3462	1427.82	22.9586		1427.82	22.9586	1427.82	22.9586	1407.12	24.3679	1.44986	2.3289
88	120.658	42944.6	2.96265	0.0911293	0.758598	3.09682	1.27122	0.246573	1.02006	0.802427	1420.78	25.4934		1431.9	19.1244	1448.46	28.3085		1448.46	28.3085	1448.46	28.3085	1420.78	25.4934	1.91111	2.60245
279	316.743	109317	0.94931	0.0973071	0.61696	3.31273	1.25186	0.247019	1.08927	0.870122	1423.08	27.2625		1484.06	19.1376	1572.31	22.6438		1572.31	22.6438	1572.31	22.6438	1423.08	27.2625	9.49085	2.16923
274	248.562	340612	2.50508	0.0908543	0.6714	3.09568	1.07553	0.247228	0.84023	0.781224	1424.16	21.0438		1431.62	16.1789	1442.7	25.0739		1442.7	25.0739	1442.7	25.0739	1424.16	21.0438	1.28495	2.25191
158	570.26	82576.5	2.4143	0.0928816	0.56212	3.16754	1.29426	0.247446	1.16582	0.90076	1425.29	29.219		1449.28	19.5778	1484.63	20.8747		1484.63	20.8747	1484.63	20.8747	1425.29	29.219	3.99691	2.38653
239	156.07	45277.7	2.37822	0.0912393	0.624419	3.11363	1.05064	0.247613	0.844951	0.804226	1426.15	21.1885		1436.06	15.8267	1450.75	23.294		1450.75	23.294	1450.75	23.294	1426.15	21.1885	1.6957	2.15047
287	284.997	91049.4	2.58802	0.0921175	0.563537	3.16707	1.08949	0.249461	0.932422	0.855835	1435.7	23.5216		1449.17	16.4796	1468.97	20.9713		1468.97	20.9713	1468.97	20.9713	1435.7	23.5216	2.26488	2.12386
87	375.25	75871	2.86499	0.0910262	0.372587	3.1341	0.885785	0.249824	0.803613	0.907233	1437.57	20.2958		1441.1	13.3645	1446.3	13.9077		1446.3	13.9077	1446.3	13.9077	1437.57	20.2958	0.603983	1.69787
131	205.067	160399	3.03097	0.0906597	0.60895	3.12571	1.08718	0.250163	0.90063	0.828411	1439.31	22.7708		1439.04	16.3925	1438.62	22.7542		1438.62	22.7542	1438.62	22.7542	1439.31	22.7708	-0.0485511	2.23818
224	200.247	61102.9	0.766683	0.100452	0.65471	3.46723	1.11692	0.250445	0.904909	0.810184	1440.77	22.8996		1519.79	17.2529	1631.64	23.8452		1631.64	23.8452	1631.64	23.8452	1440.77	22.8996	11.6981	1.90657
290	172.328	840469	0.427264	0.100585	0.727622	3.47569	1.31791	0.250724	1.09884	0.833776	1442.21	27.832		1521.71	20.3689	1634.09	26.4928		1634.09	26.4928	1634.09	26.4928	1442.21	27.832	11.7424	2.22449
173	115.477	51960.6	1.50505	0.091069	0.754383	3.15116	1.17157	0.251066	0.896375	0.765104	1443.97	22.7286		1445.28	17.6998	1447.2	28.156		1447.2	28.156	1447.2	28.156	1443.97	22.7286	0.223218	2.49696
280	274.736	98661.9	2.76802	0.0918771	0.591733	3.17952	0.996999	0.251098	0.802409	0.804824	1444.13	20.348		1452.2	15.0947	1464	22.0353		1464	22.0353	1464	22.0353	1444.13	20.348	1.35714	2.03376
49	174.771	936309	2.40078	0.0926066	0.825955	3.20963	1.21676	0.251478	0.89348	0.73431	1446.09	22.6849		1459.49	18.4635	1479.01	30.6958		1479.01	30.6958	1479.01	30.6958	1446.09	22.6849	2.22573	2.54367
194	191.865	100024	2.14468	0.090519	0.67471	3.14977	0.947819	0.25248	0.665678	0.702326	1451.25	16.9549		1444.94	14.3177	1435.65	25.2216		1435.65	25.2216	1435.65	25.2216	1451.25	16.9549	-1.08654	2.13272
36	574.704	115544	3.07151	0.0914363	0.607577	3.18278	1.10857	0.252566	0.927246	0.836432	1451.7	23.6235		1452.99	16.7881	1454.86	22.6532		1454.86	22.6532	1454.86	22.6532	1451.7	23.6235	0.217427	2.24734
222	587.317	172834	3.02575	0.0934694	0.485939	3.2546	1.02616	0.252648	0.903812	0.880767	1452.12	23.0324		1470.28	15.6225	1496.58	18.0169		1496.58	18.0169	1496.58	18.0169	1452.12	23.0324	2.97071	1.9321
276	143.006	40785.6	2.31281	0.0917426	0.574966	3.19605	0.972066	0.252772	0.783789	0.806313	1452.76	19.9817		1456.2	14.7354	1461.22	21.4189		1461.22	21.4189	1461.22	21.4189	1452.76	19.9817	0.579035	1.99845
119	193.996	47753.1	2.43841	0.0901557	0.676921	3.16006	1.07901	0.254326	0.840262	0.778735	1460.74	21.5263		1447.46	16.3124	1427.98	25.3305		1427.98	25.3305	1427.98	25.3305	1460.74	21.5263	-2.2944	2.35905
135	613.734	175344	3.8811	0.0900136	0.623163	3.15601	1.17262	0.254401	0.993336	0.847105	1461.13	25.4538		1446.47	17.7222	1424.97	23.3284		1424.97	23.3284	1424.97	23.3284	1461.13	25.4538	-2.53769	2.45126
19	543.734	231792	2.54586	0.0913852	0.506097	3.21489	1.08884	0.255257	0.964079	0.885415	1465.53	24.7704		1460.75	16.5288	1453.8	18.8722		1453.8	18.8722	1453.8	18.8722	1465.53	24.7704	-0.807216	2.14838
103	201.748	43875.3	1.07759	0.0928591	0.725176	3.27049	1.28511	0.25555	1.06095	0.825575	1467.04	27.2844		1474.06	19.5873	1484.17	26.9317		1484.17	26.9317	1484.17	26.9317	1467.04	27.2844	1.1546	2.5684
147	167.358	525424	2.4742	0.0913237	0.471565	3.21828	0.926559	0.255699	0.797583	0.860801	1467.8	20.5208		1461.57	14.0687	1452.52	17.5875		1452.52	17.5875	1452.52	17.5875	1467.8	20.5208	-1.05211	1.86897
167	289.643	360617	3.4794	0.0910065	0.662068	3.21203	1.20358	0.256091	1.00513	0.835111	1469.81	25.8922		1460.06	18.2668	1445.89	24.7148		1445.89	24.7148	1445.89	24.7148	1469.81	25.8922	-1.65445	2.49519
92	532.342	118221	1.83969	0.0920333	0.573281	3.26085	1.17644	0.257083	1.0273	0.873233	1474.9	26.545		1471.77	17.9185	1467.23	21.3389		1467.23	21.3389	1467.23	21.3389	1474.9	26.545	-0.522737	2.32605
308	384.131	95197.7	3.40619	0.0941057	0.460149	3.34191	0.94274	0.257672	0.822813	0.872789	1477.92	21.2998		1490.9	14.4411	1509.4	17.0315		1509.4	17.0315	1509.4	17.0315	1477.92	21.2998	2.08544	1.7922
160	51.6355	25520.6	2.83104	0.0909921	0.878915	3.24024	1.33871	0.258381	1.00978	0.754294	1481.56	26.1971		1466.84	20.3599	1445.59	32.8112		1445.59	32.8112	1445.59	32.8112	1481.56	26.1971	-2.48791	2.94879
32	87.4368	117648	2.69546	0.092821	0.717646	3.30634	1.22115	0.258457	0.988026	0.809094	1481.94	25.6386		1482.55	18.6598	1483.4	26.6548		1483.4	26.6548	1483.4	26.6548	1481.94	25.6386	0.0978022	2.49193
282	78.404	43499.3	1.85415	0.0934251	0.759197	3.32975	1.32413	0.258605	1.08487	0.819308	1482.7	28.1645		1488.05	20.2666	1495.68	28.1518		1495.68	28.1518	1495.68	28.1518	1482.7	28.1645	0.867771	2.65093
44	510.707	241427	3.26602	0.0931981	0.466141	3.32401	1.1186	0.258788	1.01685	0.909036	1483.64	26.4133		1486.71	17.1138	1491.07	17.2955		1491.07	17.2955	1491.07	17.2955	1483.64	26.4133	0.498792	2.11424
231	264.354	260685	1.80845	0.0917555	0.724715	3.28084	1.22427	0.259442	0.986726	0.80597	1486.99	25.6823		1476.52	18.6738	1461.49	26.9966		1461.49	26.9966	1461.49	26.9966	1486.99	25.6823	-1.74503	2.573
204	430.996	117418	3.35111	0.0930031	0.578955	3.37461	1.03776	0.263278	0.86125	0.829915	1506.59	22.6788		1498.52	15.9322	1487.11	21.4928		1487.11	21.4928	1487.11	21.4928	1487.11	21.4928	-1.30996	2.11414
243	462.417	116216	3.96662	0.0931161	0.570608	3.36856	0.999633	0.262487	0.820776	0.821077	1502.55	21.5615		1497.12	15.3406	1489.41	21.1764		1489.41	21.1764	1489.41	21.1764	1489.41	21.1764	-0.882577	2.03791
114	425.492	255053	3.251	0.093638	0.724494	3.35492	1.19869	0.259967	0.954967	0.796677	1489.67	24.8955		1493.94	18.3783	1499.98	26.8496		1499.98	26.8496	1499.98	26.8496	1489.67	24.8955	0.687553	2.43204
294	228.72	138470	0.745117	0.099148	0.611399	3.55847	1.56874	0.260416	1.44469	0.920925	1491.97	37.7142		1540.32	24.3727	1607.32	22.3407		1607.32	22.3407	1607.32	22.3407	1491.97	37.7142	7.17669	2.67772
220	681.961	343429	2.22154	0.0924478	0.522528	3.3204	0.995027	0.260604	0.846785	0.851016	1492.93	22.1182		1485.86	15.2193	1475.76	19.4275		1475.76	19.4275	1475.76	19.4275	1492.93	22.1182	-1.16384	2.00497
25	150.998	302663	2.42471	0.0939909	0.711219	3.41336	1.17769	0.263502	0.93868	0.797052	1507.73	24.7343		1507.47	18.1277	1507.09	26.3326		1507.09	26.3326	1507.09	26.3326	1507.09	26.3326	-0.0424972	2.3977
196	106.068	88516.3	1.49004	0.0949258	0.698748	3.64191	1.31042	0.278376	1.10858	0.845974	1583.18	30.5011		1558.74	20.4618	1525.76	25.8038		1525.76	25.8038	1525.76	25.8038	1525.76	25.8038	-3.76313	2.66004
18	363.118	210832	1.54266	0.0977046	0.5733	3.68988	1.27014	0.274022	1.13339	0.892337	1561.18	30.8009		1569.18	19.8885	1579.93	21.0202		1579.93	21.0202	1579.93	21.0202	1579.93	21.0202	1.18674	2.35136
55	239.734	93320.2	0.725776	0.0978215	0.572636	3.91363	1.01778	0.290291	0.84141	0.826708	1642.98	23.9182		1616.5	16.1335	1582.17	20.9898		1582.17	20.9898	1582.17	20.9898	1582.17	20.9898	-3.84349	2.04529
195	161.73	126071	1.07496	0.0979094	0.504811	3.76194	1.09846	0.278789	0.975593	0.888146	1585.26	26.8733		1584.66	17.2707	1583.85	18.4992		1583.85	18.4992	1583.85	18.4992	1583.85	18.4992	-0.0889382	2.06044
122	169.722	98241	0.828874	0.0986742	0.634805	3.89236	1.10595	0.286218	0.905614	0.81886	1622.6	25.4624		1612.1	17.5116	1598.39	23.223		1598.39	23.223	1598.39	23.223	1598.39	23.223	-1.51488	2.17095
16	340.258	116203	1.70835	0.0988564	0.41975	3.97525	1.05793	0.291775	0.971095	0.91792	1650.39	27.7139		1629.16	16.823	1601.83	15.3487		1601.83	15.3487	1601.83	15.3487	1601.83	15.3487	-3.0316	1.99199
70	140.824	66585.7	0.733168	0.0988874	0.689639	3.84316	1.14802	0.281991	0.917795	0.799459	1601.38	25.5077		1601.83	18.1304	1602.42	25.2158		1602.42	25.2158	1602.42	25.2158	1602.42	25.2158	0.0645657	2.23762
107	191.603	61945.7	0.869039	0.0990974	0.543941	3.94022	0.969149	0.2885	0.802109	0.827642	1634.03	22.6918		1621.98	15.3837	1606.37	19.8782		1606.37	19.8782	1606.37	19.8782	1606.37	19.8782	-1.72162	1.89208
245	239.284	111142	0.562357	0.0991668	0.662839	3.76767	1.05534	0.275673	0.821209	0.778147	1569.53	22.4225		1585.88	16.5979	1607.68	24.2193		1607.68	24.2193	1607.68	24.2193	1607.68	24.2193	2.37256	2.02689
241	324.436	204596	0.664656	0.0991781	0.533096	3.78047	1.01097	0.276578	0.858995	0.849672	1574.11	23.5145		1588.61	15.9114	1607.89	19.478		1607.89	19.478	1607.89	19.478	1607.89	19.478	2.10101	1.88288
39	251.977	65352	1.39231	0.0994141	0.627513	3.75003	1.17434	0.2737	0.99262	0.84526	1559.55	26.9504		1582.12	18.4514	1612.32	22.9115		1612.32	22.9115	1612.32	22.9115	1612.32	22.9115	3.27248	2.1641
184	308.605	98878.6	1.43002	0.0995241	0.650533	3.95641	1.02772	0.288443	0.795625	0.774164	1633.75	22.505		1625.31	16.327	1614.38	23.7458		1614.38	23.7458	1614.38	23.7458	1614.38	23.7458	-1.19965	2.03938
35	244.011	855566	1.62746	0.0995423	0.684586	3.88405	1.18414	0.283117	0.966194	0.815945	1607.04	26.9363		1610.37	18.7416	1614.72	24.9879		1614.72	24.9879	1614.72	24.9879	1614.72	24.9879	0.475575	2.27043
285	190.353	53898.7	0.698065	0.0995641	1.33873	3.91574	2.50226	0.285364	2.11402	0.844845	1618.32	59.3007		1616.94	39.6735	1615.13	48.867		1615.13	48.867	1615.13	48.867	1615.13	48.867	-0.197742	4.7614
278	56.2545	61418.6	1.46838	0.0996109	0.96927	3.78775	1.27256	0.275907	0.824572	0.647964	1570.72	22.5293		1590.15	20.0368	1616	35.375		1616	35.375	1616	35.375	1616	35.375	2.80233	2.54376
59	507.752	461479	1.60157	0.0996515	0.614229	3.68844	1.46556	0.268563	1.33063	0.907936	1533.51	35.5933		1568.87	22.9468	1616.76	22.4135		1616.76	22.4135	1616.76	22.4135	1616.76	22.4135	5.14949	2.56432
112	116.99	468431	0.860211	0.09971	0.748229	3.8594	1.15602	0.280847	0.881219	0.762284	1595.63	24.4135		1605.24	18.2727	1617.85	27.3002		1617.85	27.3002	1617.85	27.3002	1617.85	27.3002	1.37392	2.24652
89	133.642	192840	0.792976	0.0998258	0.723121	3.85588	1.11341	0.280265	0.846624	0.76039	1592.7	23.4172		1604.5	17.5957	1620.01	26.3767		1620.01	26.3767	1620.01	26.3767	1620.01	26.3767	1.68613	2.15679
2	247.987	116557	2.84591	0.0998302	0.520378	3.93072	0.962058	0.285692	0.809173	0.841086	1619.97	22.7184		1620.03	15.2636	1620.1	18.9801		1620.1	18.9801	1620.1	18.9801	1620.1	18.9801	0.00794444	1.82721
136	256.199	117122	1.09819	0.0998441	0.660829	3.94498	1.13804	0.286688	0.926522	0.814137	1624.96	26.0836		1622.96	18.0691	1620.36	24.1031		1620.36	24.1031	1620.36	24.1031	1620.36	24.1031	-0.284048	2.19467
4	134.702	3.00174e+06	0.68258	0.0999463	0.688123	3.88785	1.13863	0.282248	0.907178	0.796726	1602.67	25.2305		1611.16	18.0249	1622.25	25.0926		1622.25	25.0926	1622.25	25.0926	1622.25	25.0926	1.20707	2.18036
301	290.798	136819	1.40266	0.100109	0.654032	4.00944	1.05944	0.290603	0.833458	0.786698	1644.54	23.7119		1636.11	16.8759	1625.28	23.84		1625.28	23.84	1625.28	23.84	1625.28	23.84	-1.18539	2.08121
65	255.305	75766	1.03224	0.100157	0.488566	3.95693	0.897514	0.286657	0.752884	0.838855	1624.8	21.1935		1625.41	14.2587	1626.18	17.8056		1626.18	17.8056	1626.18	17.8056	1626.18	17.8056	0.0846722	1.70158
38	462.575	283712	1.71807	0.100233	0.487918	3.98027	1.27358	0.288131	1.17641	0.923703	1632.18	33.2478		1630.18	20.2575	1627.58	17.7789		1627.58	17.7789	1627.58	17.7789	1627.58	17.7789	-0.28312	2.31796
230	413.2	100900	2.1128	0.100302	0.433726	4.01977	1.0094	0.290789	0.911461	0.902977	1645.47	25.9439		1638.2	16.087	1628.87	15.8012		1628.87	15.8012	1628.87	15.8012	1628.87	15.8012	-1.01923	1.87008
272	440.477	382904	1.42657	0.100472	0.426463	3.75227	1.02059	0.270981	0.927215	0.908511	1545.78	24.9778		1582.6	16.0376	1632	15.5335		1632	15.5335	1632	15.5335	1632	15.5335	5.28345	1.77628
170	141.791	42504.2	3.77418	0.100637	0.599023	4.06691	1.10493	0.293221	0.928456	0.840289	1657.61	26.5986		1647.69	17.6503	1635.05	21.8104		1635.05	21.8104	1635.05	21.8104	1635.05	21.8104	-1.37929	2.11546
68	125.655	83731.7	2.60204	0.100757	0.766673	3.96946	1.22689	0.285852	0.957851	0.780713	1620.77	26.9044		1627.97	19.5042	1637.28	27.9066		1637.28	27.9066	1637.28	27.9066	1637.28	27.9066	1.00844	2.35523
148	397.429	161510	2.04744	0.100784	0.566751	4.0268	1.05016	0.289907	0.884102	0.841871	1641.06	25.106		1639.62	16.7425	1637.76	20.6281		1637.76	20.6281	1637.76	20.6281	1637.76	20.6281	-0.201363	1.98563
303	181.761	90548.8	1.16549	0.100869	0.625991	4.00993	1.08496	0.288448	0.88616	0.816765	1633.77	25.0661		1636.21	17.2829	1639.33	22.7797		1639.33	22.7797	1639.33	22.7797	1639.33	22.7797	0.339453	2.06296
94	285.293	1.72134e+06	1.76321	0.100904	0.603637	4.03966	1.0441	0.290485	0.851919	0.815937	1643.95	24.2295		1642.22	16.6564	1639.98	21.9644		1639.98	21.9644	1639.98	21.9644	1639.98	21.9644	-0.242383	1.99631
181	371.654	91837.7	0.600928	0.100958	0.39795	3.97604	0.753268	0.285758	0.63957	0.849059	1620.3	17.9598		1629.32	11.9787	1640.97	14.4782		1640.97	14.4782	1640.97	14.4782	1640.97	14.4782	1.25995	1.39885
223	118.518	78431.7	1.49466	0.101203	0.754356	4.02769	1.24522	0.288769	0.990717	0.795616	1635.37	28.0479		1639.8	19.8534	1645.47	27.4293		1645.47	27.4293	1645.47	27.4293	1645.47	27.4293	0.613488	2.37703
284	412.058	112438	0.789971	0.10122	0.514448	3.8514	1.26649	0.276082	1.1573	0.913784	1571.6	31.6358		1603.56	20.0103	1645.79	18.7051		1645.79	18.7051	1645.79	18.7051	1645.79	18.7051	4.50804	2.20745
267	327.27	433796	1.22999	0.101319	0.541305	3.66635	1.13614	0.262562	0.998897	0.879205	1502.93	26.2467		1564.07	17.7658	1647.59	19.677		1647.59	19.677	1647.59	19.677	1647.59	19.677	8.78	1.92992
100	150.105	35157.1	1.91326	0.101435	0.821353	4.00126	1.42851	0.286217	1.16877	0.818174	1622.6	32.8614		1634.45	22.7461	1649.72	29.8459		1649.72	29.8459	1649.72	29.8459	1649.72	29.8459	1.64396	2.67098
305	262.239	109010	1.24832	0.10165	0.659115	4.20014	1.14137	0.299808	0.931826	0.816408	1690.36	27.1565		1674.05	18.3474	1653.64	23.9378		1653.64	23.9378	1653.64	23.9378	1653.64	23.9378	-2.22021	2.21053
296	64.6945	54385.4	1.13182	0.101973	0.798787	4.23158	1.21999	0.301098	0.922131	0.755849	1696.75	26.9628		1680.17	19.6394	1659.51	28.9895		1659.51	28.9895	1659.51	28.9895	1659.51	28.9895	-2.24386	2.4145
27	84.0016	36888.3	1.08871	0.102161	0.736657	4.09815	1.34687	0.291065	1.12756	0.837172	1646.85	32.1186		1653.93	21.5478	1662.93	26.7227		1662.93	26.7227	1662.93	26.7227	1662.93	26.7227	0.967091	2.50262
171	247.671	80237.1	1.78558	0.102338	0.606681	4.10915	1.20327	0.291341	1.03913	0.86359	1648.23	29.6214		1656.12	19.2604	1666.14	21.9981		1666.14	21.9981	1666.14	21.9981	1666.14	21.9981	1.07496	2.20605
6	267.167	876915	1.66949	0.102357	0.625082	4.18518	1.23857	0.296676	1.06926	0.863306	1674.8	30.9108		1671.12	19.8962	1666.48	22.6644		1666.48	22.6644	1666.48	22.6644	1666.48	22.6644	-0.49943	2.30405
226	393.142	542970	1.69313	0.102512	0.560008	3.8714	1.52428	0.274019	1.41768	0.930067	1561.17	38.5266		1607.74	24.1094	1669.27	20.2974		1669.27	20.2974	1669.27	20.2974	1669.27	20.2974	6.47601	2.57294
213	425.136	271501	0.839744	0.102677	0.516446	4.24357	1.05752	0.299879	0.922845	0.872646	1690.71	26.8997		1682.49	17.033	1672.24	18.7111		1672.24	18.7111	1672.24	18.7111	1672.24	18.7111	-1.10441	1.96657
52	146.895	96513.2	1.17344	0.10294	0.596333	4.34741	1.13622	0.306431	0.967149	0.851201	1723.12	28.6625		1702.4	18.3843	1676.98	21.5963		1676.98	21.5963	1676.98	21.5963	1676.98	21.5963	-2.75124	2.16154
28	177.165	49652.6	2.27834	0.103081	0.655583	4.25569	1.03625	0.299556	0.802509	0.774438	1689.11	23.3726		1684.84	16.6994	1679.51	23.7345		1679.51	23.7345	1679.51	23.7345	1679.51	23.7345	-0.571452	1.98912
56	407.536	76738.1	1.52839	0.103348	0.635623	4.18534	1.11211	0.293845	0.912563	0.820569	1660.71	26.1863		1671.15	17.8648	1684.27	22.9979		1684.27	22.9979	1684.27	22.9979	1684.27	22.9979	1.3988	2.05667
255	131.956	33916.8	1.73429	0.10342	0.592761	4.23128	1.04895	0.296863	0.86541	0.825024	1675.73	25.0299		1680.11	16.8856	1685.56	21.4435		1685.56	21.4435	1685.56	21.4435	1685.56	21.4435	0.583029	1.95058
142	612.224	176803	3.24403	0.104589	0.648289	3.96194	1.24829	0.274858	1.06675	0.854566	1565.41	29.0591		1626.44	19.8368	1706.29	23.3876		1706.29	23.3876	1706.29	23.3876	1706.29	23.3876	8.25618	2.11701
113	80.6136	26884.3	1.66775	0.104697	0.603367	4.48774	1.07517	0.311016	0.889915	0.827694	1745.71	26.6746		1728.71	17.4989	1708.17	21.7615		1708.17	21.7615	1708.17	21.7615	1708.17	21.7615	-2.19719	2.03314
172	358.07	328792	2.24937	0.10563	0.706246	4.53859	1.29775	0.31176	1.08875	0.838951	1749.36	32.6941		1738.07	21.1649	1724.5	25.4238		1724.5	25.4238	1724.5	25.4238	1724.5	25.4238	-1.4417	2.41473
188	375.154	149509	3.18431	0.105898	0.526879	4.61201	0.959374	0.316001	0.801747	0.835697	1770.17	24.3245		1751.44	15.6912	1729.15	18.9557		1729.15	18.9557	1729.15	18.9557	1729.15	18.9557	-2.3725	1.79954
76	363.689	2.33557e+06	1.83503	0.106149	0.552748	4.47867	1.18723	0.30614	1.05071	0.885008	1721.68	31.1164		1727.03	19.3157	1733.49	19.8721		1733.49	19.8721	1733.49	19.8721	1733.49	19.8721	0.681292	2.12564
227	128.908	80754.6	1.63043	0.106375	0.716247	4.56604	1.15056	0.31145	0.900429	0.782602	1747.84	27.0185		1743.09	18.7845	1737.39	25.7388		1737.39	25.7388	1737.39	25.7388	1737.39	25.7388	-0.601599	2.15398
155	667.578	105795	2.15571	0.106723	0.589689	4.18561	1.33669	0.284568	1.19959	0.897431	1614.33	33.5765		1671.21	21.473	1743.38	21.1743		1743.38	21.1743	1743.38	21.1743	1743.38	21.1743	7.40245	2.23027
312	265.6	92800.3	1.31378	0.106753	0.555582	4.60439	1.20456	0.312953	1.06878	0.88728	1755.22	32.1881		1750.06	19.6958	1743.89	19.9481		1743.89	19.9481	1743.89	19.9481	1743.89	19.9481	-0.650113	2.17541
242	509.776	2.53002e+06	2.4877	0.106766	0.534379	4.60801	1.08249	0.313161	0.941397	0.869657	1756.24	28.3659		1750.72	17.7022	1744.11	19.1861		1744.11	19.1861	1744.11	19.1861	1744.11	19.1861	-0.695507	1.96777
249	209.848	137293	1.15317	0.106797	0.576619	4.45582	0.836587	0.30273	0.606126	0.724522	1704.83	17.7967		1722.78	13.5979	1744.64	20.7016		1744.64	20.7016	1744.64	20.7016	1744.64	20.7016	2.28191	1.54435
75	454.944	103094	1.73142	0.107039	0.598489	4.54	1.19983	0.307754	1.0399	0.86671	1729.65	30.9204		1738.33	19.5688	1748.78	21.4759		1748.78	21.4759	1748.78	21.4759	1748.78	21.4759	1.09409	2.14511
7	324.925	423760	2.6876	0.107653	0.535687	4.70278	1.0541	0.316968	0.907834	0.861243	1774.91	27.6072		1767.74	17.3	1759.26	19.2004		1759.26	19.2004	1759.26	19.2004	1759.26	19.2004	-0.889443	1.91702
281	220.319	34769.5	1.38071	0.107674	0.916558	4.54112	1.13792	0.306014	0.674375	0.592639	1721.06	19.965		1738.54	18.5599	1759.6	32.8508		1759.6	32.8508	1759.6	32.8508	1759.6	32.8508	2.19029	2.14985
177	203.215	57624.6	3.31565	0.107687	0.58611	4.66017	1.04635	0.313997	0.866789	0.828393	1760.35	26.171		1760.12	17.1453	1759.84	21.0062		1759.84	21.0062	1759.84	21.0062	1759.84	21.0062	-0.0289978	1.90713
298	363.408	91618.2	1.99446	0.108112	0.600723	4.79558	0.962263	0.321853	0.75172	0.7812	1798.77	23.1262		1784.13	15.8465	1767.02	21.5106		1767.02	21.5106	1767.02	21.5106	1767.02	21.5106	-1.79664	1.80236
152	283.14	551091	2.28134	0.109905	0.575973	5.02643	0.992561	0.331839	0.808352	0.81441	1847.29	25.4479		1823.78	16.476	1797.03	20.5482		1797.03	20.5482	1797.03	20.5482	1797.03	20.5482	-2.79693	1.84038
116	397.139	95055.3	1.74819	0.110541	0.61146	4.98788	1.05061	0.327401	0.854342	0.813186	1825.77	26.6247		1817.27	17.4173	1807.52	21.7824		1807.52	21.7824	1807.52	21.7824	1807.52	21.7824	-1.00988	1.91088
5	705.648	148515	2.39635	0.110611	0.663447	4.32287	1.65155	0.283572	1.51243	0.915766	1609.33	42.2177		1697.73	26.695	1808.66	23.6315		1808.66	23.6315	1808.66	23.6315	1808.66	23.6315	11.0211	2.60769
81	327.408	490423	1.77569	0.110676	0.564574	5.03551	0.956107	0.330124	0.77162	0.807043	1838.98	24.1971		1825.31	15.8756	1809.74	20.1064		1809.74	20.1064	1809.74	20.1064	1809.74	20.1064	-1.61602	1.74993
13	394.672	332202	2.51187	0.111189	0.601607	4.93716	0.943171	0.322182	0.726389	0.770156	1800.37	22.3642		1808.63	15.6093	1818.14	21.4036		1818.14	21.4036	1818.14	21.4036	1818.14	21.4036	0.977129	1.69468
205	100.209	112919	1.00453	0.111212	0.743832	5.16676	1.08222	0.337096	0.786078	0.726356	1872.68	25.0399		1847.16	18.0458	1818.51	26.4634		1818.51	26.4634	1818.51	26.4634	1818.51	26.4634	-2.97908	2.03512
85	339.684	102099	2.27402	0.111344	0.513328	4.99437	1.06628	0.325464	0.934582	0.87649	1816.36	28.9953		1818.37	17.6809	1820.66	18.2567		1820.66	18.2567	1820.66	18.2567	1820.66	18.2567	0.236316	1.8807
86	429.936	139711	5.97548	0.111559	0.559209	5.06359	1.13612	0.329339	0.98897	0.870478	1835.18	30.9575		1830.03	18.8822	1824.15	19.8804		1824.15	19.8804	1824.15	19.8804	1824.15	19.8804	-0.6044	2.02046
183	342.396	203741	3.47489	0.111656	0.498664	5.07742	1.04384	0.329952	0.917021	0.878511	1838.15	28.7455		1832.34	17.3561	1825.73	17.7242		1825.73	17.7242	1825.73	17.7242	1825.73	17.7242	-0.680152	1.85317
146	318.028	81455.9	3.345	0.111662	0.542245	5.05228	1.0567	0.3283	0.90697	0.858301	1830.14	28.3233		1828.13	17.5557	1825.83	19.2733		1825.83	19.2733	1825.83	19.2733	1825.83	19.2733	-0.236083	1.87775
162	233.205	250856	2.39753	0.111865	0.595078	5.12401	1.12884	0.332355	0.959248	0.849766	1849.79	30.2335		1840.1	18.7977	1829.14	21.1466		1829.14	21.1466	1829.14	21.1466	1829.14	21.1466	-1.12887	2.02458
234	52.257	17830.4	0.560588	0.112349	0.922834	5.31303	1.31777	0.34313	0.940685	0.713848	1901.71	30.3641		1870.96	22.0723	1836.96	32.7628		1836.96	32.7628	1836.96	32.7628	1836.96	32.7628	-3.52479	2.47819
79	267.546	107327	4.63795	0.113205	0.676746	5.32224	1.16949	0.341127	0.953795	0.815564	1892.09	30.6533		1872.44	19.5939	1850.69	23.9822		1850.69	23.9822	1850.69	23.9822	1850.69	23.9822	-2.23709	2.12099
232	221.428	1.95886e+06	4.43644	0.113297	0.695899	5.10575	1.11824	0.326986	0.875322	0.782767	1823.76	27.2525		1837.06	18.6104	1852.16	24.6566		1852.16	24.6566	1852.16	24.6566	1852.16	24.6566	1.53325	1.9706
37	271.884	1.22568e+06	1.20533	0.113559	0.503381	5.30185	1.04505	0.338763	0.915825	0.876346	1880.71	29.2806		1869.16	17.4982	1856.32	17.8254		1856.32	17.8254	1856.32	17.8254	1856.32	17.8254	-1.31393	1.85324
300	384.983	187427	2.08582	0.113564	0.52836	5.27706	1.22979	0.337162	1.11051	0.903003	1873	35.3795		1865.16	20.5764	1856.41	18.7099		1856.41	18.7099	1856.41	18.7099	1856.41	18.7099	-0.893974	2.16012
95	519.497	100168	1.16475	0.113829	0.556168	5.20404	1.20061	0.331722	1.06402	0.886234	1846.72	33.4878		1853.28	20.0433	1860.62	19.6849		1860.62	19.6849	1860.62	19.6849	1860.62	19.6849	0.747176	2.08374
120	144.104	271928	1.00791	0.113892	0.810985	5.15888	1.24479	0.328662	0.944356	0.758646	1831.89	29.5152		1845.86	20.7516	1861.62	28.7022		1861.62	28.7022	1861.62	28.7022	1861.62	28.7022	1.59706	2.19441
134	399.338	1.58431e+06	2.34575	0.114119	0.492282	5.23597	1.21357	0.332909	1.10924	0.914029	1852.46	35.0046		1858.49	20.2796	1865.22	17.4173		1865.22	17.4173	1865.22	17.4173	1865.22	17.4173	0.683986	2.09334
24	270.685	91865.9	0.981701	0.114563	0.57059	5.02653	0.981276	0.318354	0.798329	0.813562	1781.69	24.3577		1823.8	16.2888	1872.22	20.1709		1872.22	20.1709	1872.22	20.1709	1872.22	20.1709	4.8357	1.65644
23	180.779	55139.8	4.70183	0.11496	0.386099	5.41807	1.09117	0.341968	1.02058	0.935306	1896.13	32.8598		1887.72	18.3329	1878.46	13.6386		1878.46	13.6386	1878.46	13.6386	1878.46	13.6386	-0.940905	1.89662
277	529.106	135840	2.29844	0.115247	0.677385	5.31363	1.25183	0.334543	1.05273	0.840949	1860.36	33.3434		1871.06	20.9682	1882.94	23.9116		1882.94	23.9116	1882.94	23.9116	1882.94	23.9116	1.19923	2.17025
121	321.578	263523	2.12945	0.115905	0.425491	5.53437	0.88649	0.34646	0.777703	0.877283	1917.67	25.2842		1905.95	14.9428	1893.2	14.9999		1893.2	14.9999	1893.2	14.9999	1893.2	14.9999	-1.29285	1.55811
225	581.981	307523	2.44015	0.116319	0.475539	5.24553	1.13774	0.327209	1.0336	0.908462	1824.84	32.1967		1860.05	19.0179	1899.61	16.7557		1899.61	16.7557	1899.61	16.7557	1899.61	16.7557	3.93608	1.89492
126	370.599	97146.8	1.45627	0.116698	0.42552	5.36132	1.14193	0.333346	1.05969	0.927979	1854.58	33.4738		1878.7	19.1541	1905.45	14.9828		1905.45	14.9828	1905.45	14.9828	1905.45	14.9828	2.66991	1.9162
198	304.738	150437	1.24973	0.117273	0.655209	5.64319	1.33537	0.349152	1.16358	0.871352	1930.55	38.0473		1922.72	22.5763	1914.28	23.046		1914.28	23.046	1914.28	23.046	1914.28	23.046	-0.849755	2.32905
262	109.93	25420.8	0.634667	0.117543	0.621677	5.7485	1.17907	0.354852	1.00187	0.849705	1957.72	33.1543		1938.69	19.9889	1918.4	21.8519		1918.4	21.8519	1918.4	21.8519	1918.4	21.8519	-2.04992	2.08279
236	81.4046	87820.3	0.852492	0.120088	0.68158	5.79117	1.10829	0.349908	0.873933	0.788541	1934.16	28.6222		1945.09	18.8094	1956.74	23.8497		1956.74	23.8497	1956.74	23.8497	1956.74	23.8497	1.15404	1.89503
40	268.748	3.90452e+07	0.970815	0.121835	0.518259	5.98557	0.905902	0.356469	0.743012	0.82019	1965.42	24.6708		1973.75	15.4483	1982.48	18.0833		1982.48	18.0833	1982.48	18.0833	1982.48	18.0833	0.860565	1.53831
313	486.375	320227	2.30884	0.12307	0.473142	6.04883	1.1467	0.356622	1.04453	0.910906	1966.14	34.6934		1982.9	19.584	2000.41	16.4706		2000.41	16.4706	2000.41	16.4706	2000.41	16.4706	1.71294	1.91383
203	317.258	293613	1.337	0.123381	0.623981	6.28689	1.12407	0.369723	0.934975	0.831778	2028.1	31.8874		2016.63	19.3013	2004.89	21.7116		2004.89	21.7116	2004.89	21.7116	2004.89	21.7116	-1.15726	1.93123
178	482.483	167347	1.48589	0.124076	0.45246	6.44322	1.0777	0.376793	0.978117	0.907598	2061.29	33.8221		2038.18	18.5668	2014.86	15.7283		2014.86	15.7283	2014.86	15.7283	2014.86	15.7283	-2.30407	1.85891
54	928.104	325300	5.29238	0.125614	0.574451	6.155	1.18303	0.355531	1.0342	0.874195	1960.95	34.2727		1998.08	20.2543	2036.68	19.9147		2036.68	19.9147	2036.68	19.9147	2036.68	19.9147	3.71831	1.92822
219	640.606	327344	2.50442	0.126308	0.473246	6.61649	1.08789	0.380089	0.979565	0.900425	2076.7	34.0868		2061.55	18.8086	2046.42	16.3914		2046.42	16.3914	2046.42	16.3914	2046.42	16.3914	-1.47955	1.85342
192	104.644	104578	2.064	0.127906	0.734403	6.56094	1.29889	0.37219	1.07134	0.824813	2039.7	36.716		2054.12	22.432	2068.6	25.3683		2068.6	25.3683	2068.6	25.3683	2068.6	25.3683	1.39743	2.14768
215	98.3102	42759.1	0.740313	0.128547	0.678374	6.15336	2.23608	0.347328	2.1307	0.952871	1921.83	69.4012		1997.85	38.2851	2077.41	23.4093		2077.41	23.4093	2077.41	23.4093	2077.41	23.4093	7.4892	3.49963
306	121.246	64066.6	1.55808	0.132986	0.418089	7.24305	0.976101	0.395187	0.882028	0.903624	2146.84	31.5666		2141.82	17.0697	2136.99	14.3336		2136.99	14.3336	2136.99	14.3336	2136.99	14.3336	-0.46069	1.62358
63	323.87	103624	1.55443	0.143242	0.490393	8.6355	0.965007	0.437426	0.831116	0.861254	2339.11	31.9562		2300.3	17.2124	2266	16.5727		2266	16.5727	2266	16.5727	2266	16.5727	-3.22599	1.59961
266	140.885	86875.6	0.559673	0.154418	0.606582	9.46837	1.03239	0.444902	0.835391	0.809185	2372.55	32.5006		2384.48	18.5839	2394.68	20.2304		2394.68	20.2304	2394.68	20.2304	2394.68	20.2304	0.924463	1.59453
257	394.872	155051	2.56162	0.157716	0.673218	9.47427	1.12619	0.435872	0.902817	0.801657	2332.13	34.6273		2385.06	20.2738	2430.56	22.3651		2430.56	22.3651	2430.56	22.3651	2430.56	22.3651	4.04969	1.67606
80	363.53	95170.4	1.39571	0.157803	0.517351	9.87139	1.08255	0.453889	0.950931	0.878415	2412.52	37.5096		2422.84	19.5633	2431.51	17.1841		2431.51	17.1841	2431.51	17.1841	2431.51	17.1841	0.780951	1.69454
247	292.815	544140	1.6675	0.158631	0.519406	10.0868	0.946709	0.461375	0.791502	0.836056	2445.63	31.5733		2442.76	17.142	2440.37	17.2421		2440.37	17.2421	2440.37	17.2421	2440.37	17.2421	-0.215381	1.47487
164	322.263	101700	1.48644	0.160375	0.500625	9.80628	1.05083	0.443665	0.923917	0.879224	2367.03	35.8755		2416.74	18.9784	2458.87	16.5817		2458.87	16.5817	2458.87	16.5817	2458.87	16.5817	3.73518	1.59693
165	211.571	363594	0.640521	0.16199	0.597467	10.8279	1.05725	0.485006	0.87224	0.825011	2549.03	35.994		2508.47	19.2625	2475.78	19.7573		2475.78	19.7573	2475.78	19.7573	2475.78	19.7573	-2.95854	1.66995
270	394.33	257624	2.08178	0.162019	0.637356	10.3953	1.19016	0.465545	1.00511	0.84452	2463.99	40.3415		2470.64	21.6082	2476.09	21.0761		2476.09	21.0761	2476.09	21.0761	2476.09	21.0761	0.488429	1.83627
66	136.769	775066	1.6104	0.162826	0.455963	10.6871	0.843106	0.476237	0.709172	0.841142	2510.85	28.9064		2496.3	15.3437	2484.47	15.0689		2484.47	15.0689	2484.47	15.0689	2484.47	15.0689	-1.06191	1.31507
69	15.0758	59955.3	2.69032	0.164375	0.821148	10.3473	1.32279	0.456753	1.03706	0.783995	2425.21	41.0844		2466.35	24.0068	2500.42	27.089		2500.42	27.089	2500.42	27.089	2500.42	27.089	3.00802	1.95037
72	283.454	137078	1.24888	0.164415	0.555684	10.7356	1.0526	0.473775	0.893976	0.849298	2500.09	36.3113		2500.51	19.164	2500.84	18.3286		2500.84	18.3286	2500.84	18.3286	2500.84	18.3286	0.0297434	1.62635
78	447.708	2.91791e+06	2.6579	0.165215	0.585916	10.7665	1.29977	0.47284	1.16021	0.892632	2496	47.0623		2503.18	23.67	2508.99	19.3107		2508.99	19.3107	2508.99	19.3107	2508.99	19.3107	0.517721	2.026
216	154.822	42580.2	2.09206	0.167163	0.504175	10.9698	0.966759	0.476151	0.824882	0.853245	2510.48	33.6187		2520.57	17.633	2528.7	16.5892		2528.7	16.5892	2528.7	16.5892	2528.7	16.5892	0.720475	1.48045
302	189.491	179439	2.12799	0.169552	0.483807	11.7462	1.05671	0.50267	0.939454	0.889034	2625.26	39.7073		2584.39	19.3809	2552.48	15.8759		2552.48	15.8759	2552.48	15.8759	2552.48	15.8759	-2.85142	1.68204
26	180.289	345678	1.11934	0.16995	0.640951	11.902	0.922967	0.508141	0.664116	0.719544	2648.69	28.2723		2596.72	16.9452	2556.41	21.0265		2556.41	21.0265	2556.41	21.0265	2556.41	21.0265	-3.60966	1.39618
111	264.067	237170	2.47977	0.172369	0.657672	11.8226	1.1671	0.497671	0.964147	0.826108	2603.78	40.4804		2590.46	21.4164	2580.04	21.5311		2580.04	21.5311	2580.04	21.5311	2580.04	21.5311	-0.919994	1.78073
151	355.052	366804	14.077	0.172558	0.581249	11.404	1.16721	0.479522	1.01218	0.867187	2525.19	41.4499		2556.75	21.3573	2581.87	19.0257		2581.87	19.0257	2581.87	19.0257	2581.87	19.0257	2.19567	1.75977
99	80.6357	66224.9	0.739425	0.173415	0.547057	11.6584	1.04073	0.487795	0.885356	0.850704	2561.13	36.6765		2577.36	19.0765	2590.14	17.886		2590.14	17.886	2590.14	17.886	2590.14	17.886	1.12014	1.57203
8	492.086	725722	1.59555	0.173476	0.519372	11.3974	1.33211	0.47671	1.22669	0.920863	2512.92	50.0346		2556.22	24.3738	2590.73	16.9796		2590.73	16.9796	2590.73	16.9796	2590.73	16.9796	3.00348	2.03323
159	435.266	280460	1.5952	0.174158	0.483877	11.6517	1.37105	0.48544	1.28283	0.935652	2550.92	52.9695		2576.83	25.1306	2597.26	15.809		2597.26	15.809	2597.26	15.809	2597.26	15.809	1.78434	2.12525
228	541.96	1.13218e+06	40.4424	0.176333	0.459643	12.5296	0.987286	0.515572	0.873763	0.885015	2680.37	37.5562		2644.95	18.1967	2617.95	14.9931		2617.95	14.9931	2617.95	14.9931	2617.95	14.9931	-2.38457	1.54977
254	279.533	166565	0.880687	0.178958	0.511534	12.5468	0.873121	0.508706	0.707582	0.810406	2651.1	30.145		2646.24	16.0941	2642.5	16.6403		2642.5	16.6403	2642.5	16.6403	2642.5	16.6403	-0.325526	1.30403
45	451.202	158721	1.36519	0.178961	0.509611	12.8432	1.19428	0.520718	1.08009	0.904389	2702.23	46.7296		2668.22	22.0519	2642.52	16.5777		2642.52	16.5777	2642.52	16.5777	2642.52	16.5777	-2.25926	1.88114
64	402.065	946073	0.825021	0.179383	0.593562	12.4522	1.3869	0.503677	1.25346	0.903789	2629.58	53.0501		2639.12	25.5509	2646.43	19.3027		2646.43	19.3027	2646.43	19.3027	2646.43	19.3027	0.636899	2.13158
157	172.491	107756	0.87373	0.179768	0.628941	12.9425	1.15268	0.522386	0.965967	0.838022	2709.29	41.8799		2675.47	21.2955	2650	20.4468		2650	20.4468	2650	20.4468	2650	20.4468	-2.23757	1.76631
20	73.2662	34381.5	1.98362	0.180172	0.617129	13.0316	0.937236	0.524803	0.705382	0.752619	2719.52	30.6748		2681.94	17.3235	2653.72	20.0618		2653.72	20.0618	2653.72	20.0618	2653.72	20.0618	-2.47955	1.39153
106	182.183	1.19493e+06	3.23961	0.180439	0.630674	12.2946	1.01607	0.494392	0.796643	0.784047	2589.65	33.3001		2627.16	18.7008	2656.18	20.4973		2656.18	20.4973	2656.18	20.4973	2656.18	20.4973	2.50465	1.46211
176	72.6784	49671	0.696572	0.180571	0.663212	12.6506	1.1544	0.508339	0.944879	0.8185	2649.53	40.2352		2653.99	21.2921	2657.38	21.5524		2657.38	21.5524	2657.38	21.5524	2657.38	21.5524	0.295376	1.7165
21	116.356	133080	0.580288	0.181448	0.597812	12.4653	1.19129	0.498469	1.03044	0.864973	2607.21	43.3099		2640.12	21.9487	2665.42	19.412		2665.42	19.412	2665.42	19.412	2665.42	19.412	2.18377	1.77419
42	272.845	101904	1.13383	0.181565	0.588485	12.5337	1.15498	0.500878	0.993808	0.860458	2617.57	41.9049		2645.25	21.2881	2666.49	19.1072		2666.49	19.1072	2666.49	19.1072	2666.49	19.1072	1.83462	1.72178
14	142.491	123869	0.738084	0.183441	0.546554	12.8812	0.866014	0.509505	0.671758	0.77569	2654.51	28.6485		2671	15.9937	2683.5	17.7107		2683.5	17.7107	2683.5	17.7107	2683.5	17.7107	1.08021	1.25138
299	557.945	971821	2.10614	0.187051	0.581147	12.2416	2.46815	0.47486	2.39875	0.971884	2504.84	97.5851		2623.1	45.4182	2715.68	18.782		2715.68	18.782	2715.68	18.782	2715.68	18.782	7.7637	3.64958
102	204.511	117099	1.28625	0.188246	0.526704	13.5032	0.919659	0.520473	0.753893	0.819753	2701.18	32.6065		2715.51	17.041	2726.17	17.0056		2726.17	17.0056	2726.17	17.0056	2726.17	17.0056	0.916661	1.34631
41	124.694	152103	6.93046	0.189608	0.66822	13.4286	1.36145	0.51388	1.18618	0.871264	2673.17	50.8743		2710.27	25.2184	2738.03	21.545		2738.03	21.545	2738.03	21.545	2738.03	21.545	2.3688	2.01062
209	115.499	108627	2.2771	0.191804	0.570043	14.2813	1.11317	0.540254	0.956139	0.858932	2784.51	42.3743		2768.57	20.7048	2756.96	18.3531		2756.96	18.3531	2756.96	18.3531	2756.96	18.3531	-0.999214	1.67762
83	245.692	71675.8	1.28503	0.193426	0.510914	14.5338	1.06362	0.545195	0.932871	0.877074	2805.16	41.5878		2785.21	19.8056	2770.79	16.4282		2770.79	16.4282	2770.79	16.4282	2770.79	16.4282	-1.24049	1.61652
256	256.256	297536	1.28444	0.197783	0.648182	15.0716	1.21867	0.552913	1.032	0.846822	2837.28	46.4263		2819.77	22.7453	2807.27	20.7734		2807.27	20.7734	2807.27	20.7734	2807.27	20.7734	-1.0691	1.81504
144	100.389	155824	1.05127	0.204639	0.56618	16.2346	1.06722	0.575627	0.90465	0.847672	2930.88	41.7584		2890.71	20.0075	2862.84	18.055		2862.84	18.055	2862.84	18.055	2862.84	18.055	-2.37682	1.59515
43	150.713	161042	0.898741	0.271798	0.576408	25.6057	1.00321	0.683563	0.821092	0.818461	3358.02	42.1227		3331.6	19.2156	3315.74	17.7059		3315.74	17.7059	3315.74	17.7059	3315.74	17.7059	-1.27508	1.38071
132	318.054	645236	1.45333	0.300569	0.451801	30.0894	0.848155	0.726369	0.717804	0.846313	3519.87	38.1597		3489.73	16.337	3472.47	13.7187		3472.47	13.7187	3472.47	13.7187	3472.47	13.7187	-1.3651	1.16961
Rejected Analyses (>10% discordant; >5% reverse discordant; >10% 2σ uncertainty)
310	544.483	5234.57	3.92728	0.0468289	1.34895	0.10338	2.44589	0.016018	2.04027	0.834163	102.441	4.06415		99.8913	4.56073	39.4921	63.2599	x	102.441	4.06415	102.441	4.06415	102.441	4.06415	-159.395	415.635			x
307	83.8095	2479.8	0.362447	0.111224	1.30182	1.00074	1.77968	0.065285	1.21347	0.681847	407.687	9.39616		704.188	17.7162	1818.7	46.3182		407.687	9.39616	407.687	9.39616	407.687	9.39616	77.5836	0.769961	x		x
154	594.801	28079.9	0.728651	0.170409	0.548467	5.74736	4.02081	0.244717	3.98323	0.990653	1411.17	98.949		1938.52	68.1874	2560.92	17.9839		2560.92	17.9839	2560.92	17.9839	1411.17	98.949	44.8959	3.88314	x		x
250	553.738	16641.4	1.63102	0.117452	0.631381	3.07144	3.10375	0.189745	3.03885	0.97909	1119.99	61.2355		1425.6	46.6064	1917.01	22.1968		1917.01	22.1968	1119.99	61.2355	1119.99	61.2355	41.5759	3.26517	x		x
206	128.094	43361.1	0.930162	0.162744	0.6117	5.67639	1.16336	0.253078	0.98956	0.850605	1454.33	25.2518		1927.78	19.6854	2483.63	20.2176		2483.63	20.2176	2483.63	20.2176	1454.33	25.2518	41.4433	1.12293	x		x
73	986.015	17641.5	1.15381	0.105044	0.807132	2.74565	1.52841	0.189655	1.29791	0.849191	1119.5	26.1434		1340.91	22.2978	1714.26	29.0897		1714.26	29.0897	1119.5	26.1434	1119.5	26.1434	34.6947	1.88517	x		x
17	668.215	9620.74	3.76632	0.102723	4.71218	2.64739	4.83719	0.186998	1.09262	0.225878	1105.09	21.7485		1313.92	69.9027	1673.08	170.818	x	1673.08	170.818	1105.09	21.7485	1105.09	21.7485	33.9485	6.86788	x		x
156	491.664	35487.4	1.3943	0.111335	0.584419	3.20524	2.64973	0.208889	2.58448	0.975374	1222.9	56.4261		1458.43	40.1992	1820.52	20.786		1820.52	20.786	1820.52	20.786	1222.9	56.4261	32.827	3.19293	x		x
185	727.889	21628.1	1.014	0.174037	3.51899	7.8458	4.7775	0.327102	3.23129	0.676357	1824.32	100.633		2213.48	84.3815	2596.12	115.047		2596.12	115.047	2596.12	115.047	2596.12	115.047	29.7289	4.97222	x		x
217	394.133	28346.5	0.621794	0.126389	1.15965	4.40603	3.16531	0.252944	2.94524	0.930472	1453.64	75.1263		1713.47	51.3532	2047.56	40.1572		2047.56	40.1572	2047.56	40.1572	1453.64	75.1263	29.0062	3.92437	x		x
109	106.785	5585.83	0.559753	0.122741	4.78094	4.52565	5.45722	0.267535	2.63133	0.482173	1528.28	70.1737		1735.7	89.0112	1995.65	166.641		1995.65	166.641	1995.65	166.641	1995.65	166.641	23.4197	7.29765	x		x
51	662.439	22629	2.37605	0.112897	0.840615	3.90842	1.99567	0.251193	1.80999	0.906959	1444.63	45.9131		1615.43	31.628	1845.76	29.8082		1845.76	29.8082	1845.76	29.8082	1444.63	45.9131	21.7326	2.79021	x		x
200	200.009	154170	1.13017	0.0879825	0.809438	2.21444	1.29359	0.182623	1.00906	0.780041	1081.29	19.6879		1185.61	17.7359	1381.25	30.4827		1381.25	30.4827	1081.29	19.6879	1081.29	19.6879	21.7166	2.23973	x		x
143	683.719	20857.1	2.12223	0.111782	0.823723	3.84409	2.29645	0.249522	2.14363	0.933455	1436.01	54.0868		1602.03	36.272	1827.79	29.2731		1827.79	29.2731	1827.79	29.2731	1436.01	54.0868	21.4346	3.21555	x		x
129	207.91	55491.8	0.485602	0.102861	0.596873	3.22547	1.25024	0.227526	1.09856	0.878682	1321.52	25.7277		1463.3	18.9937	1675.55	21.6198		1675.55	21.6198	1675.55	21.6198	1321.52	25.7277	21.1291	1.84211	x		x
15	665.475	51327.5	2.20467	0.205892	0.649057	12.0653	1.62829	0.425196	1.49333	0.917119	2284.02	56.2922		2609.5	29.9274	2872.76	20.672		2872.76	20.672	2872.76	20.672	2872.76	20.672	20.4939	2.04133	x		x
246	259.968	102279	0.847101	0.101568	0.692447	3.18323	1.41612	0.227404	1.23528	0.872298	1320.88	28.9169		1453.1	21.4467	1652.15	25.1533		1652.15	25.1533	1652.15	25.1533	1320.88	28.9169	20.0509	2.13189	x		x
34	537.346	38924.5	2.00569	0.163279	0.493215	8.14947	1.8488	0.362149	1.7818	0.963759	1992.35	59.8548		2247.75	32.7755	2489.16	16.2924		2489.16	16.2924	2489.16	16.2924	2489.16	16.2924	19.9588	2.46103	x		x
248	686.75	46028.1	3.31185	0.153713	0.578806	7.32129	1.35538	0.345593	1.22558	0.904231	1913.52	39.7711		2151.41	23.7337	2386.89	19.3142		2386.89	19.3142	2386.89	19.3142	2386.89	19.3142	19.832	1.78806	x		x
145	1155.64	114322	4.93297	0.116285	0.522597	4.29086	0.994874	0.267737	0.846562	0.850924	1529.3	22.5898		1691.61	16.0576	1899.08	18.4112		1899.08	18.4112	1899.08	18.4112	1899.08	18.4112	19.4714	1.42283	x		x
275	758.314	35328.1	2.16831	0.15396	0.557113	7.39457	1.20215	0.348492	1.06526	0.886133	1927.4	34.7838		2160.31	21.0753	2389.62	18.5849		2389.62	18.5849	2389.62	18.5849	2389.62	18.5849	19.343	1.58503	x		x
288	819.276	81486.3	2.26041	0.093558	0.605082	2.68982	1.2597	0.208607	1.10486	0.877083	1221.39	24.095		1325.66	18.2761	1498.37	22.4289		1498.37	22.4289	1498.37	22.4289	1221.39	24.095	18.485	2.01861	x		x
149	500.69	47620.3	0.843981	0.103342	0.620618	3.39865	1.66759	0.238625	1.5478	0.928166	1379.55	37.6762		1504.08	25.644	1684.18	22.4552		1684.18	22.4552	1684.18	22.4552	1379.55	37.6762	18.0878	2.48943	x		x
169	609.744	41040.6	1.01782	0.101865	0.442901	3.30538	1.22952	0.235443	1.14698	0.932866	1362.96	27.6181		1482.32	18.7864	1657.55	16.0761		1657.55	16.0761	1657.55	16.0761	1362.96	27.6181	17.7724	1.84722	x		x
117	195.465	20006.2	0.762723	0.102364	0.816203	3.35193	1.61151	0.237595	1.38952	0.862249	1374.18	33.7054		1493.24	24.7032	1666.59	29.5949		1666.59	29.5949	1666.59	29.5949	1374.18	33.7054	17.5455	2.49681	x		x
186	165.07	978887	0.952119	0.149963	0.49364	7.28287	0.912144	0.352375	0.767024	0.840902	1945.93	25.2518		2146.71	15.9617	2344.75	16.5438		2344.75	16.5438	2344.75	16.5438	2344.75	16.5438	17.009	1.22585	x		x
208	129.85	135931	1.31774	0.0897617	0.870721	2.5129	3.51433	0.203129	3.40475	0.968821	1192.11	72.6314		1275.77	50.0414	1419.61	32.6198		1419.61	32.6198	1192.11	72.6314	1192.11	72.6314	16.0258	5.46805	x		x
82	446.635	46469.7	0.771158	0.102314	0.842043	3.41877	1.77139	0.24245	1.55846	0.879794	1399.42	38.4251		1508.72	27.277	1665.7	30.5355		1665.7	30.5355	1665.7	30.5355	1399.42	38.4251	15.9859	2.77373	x		x
261	218.281	22767.1	1.87026	0.0933465	0.889973	2.76865	1.74387	0.215208	1.49968	0.859971	1256.5	33.5568		1347.13	25.498	1494.09	33.0084		1494.09	33.0084	1494.09	33.0084	1256.5	33.5568	15.9015	2.91486	x		x
286	526.375	273014	1.57647	0.101918	0.528937	3.42605	1.1024	0.243911	0.967222	0.877376	1407	23.9631		1510.39	16.983	1658.52	19.1972		1658.52	19.1972	1658.52	19.1972	1407	23.9631	15.1654	1.74695	x		x
295	705.427	81155.3	2.32717	0.107578	0.486446	3.86568	1.22961	0.26073	1.1293	0.918419	1493.57	29.5089		1606.54	19.4424	1757.98	17.4382		1757.98	17.4382	1757.98	17.4382	1493.57	29.5089	15.0401	1.87826	x		x
12	438.495	94920.4	2.32901	0.12725	0.621045	5.54774	1.457	0.316335	1.31802	0.904606	1771.81	40.02		1908.03	24.5693	2059.54	21.4783		2059.54	21.4783	2059.54	21.4783	2059.54	21.4783	13.9708	2.14027	x		x
90	522.595	63636.1	1.33312	0.0966315	0.699134	3.0865	1.21719	0.231758	0.996377	0.818587	1343.71	23.6869		1429.34	18.2967	1559.25	25.7074		1559.25	25.7074	1559.25	25.7074	1343.71	23.6869	13.8233	2.08	x		x
130	472.637	42373	2.38682	0.122593	0.650557	5.15991	2.03346	0.305397	1.92659	0.947443	1718.01	56.9493		1846.03	33.9025	1993.51	22.6663		1993.51	22.6663	1993.51	22.6663	1993.51	22.6663	13.8198	3.02011	x		x
189	379.266	173277	0.895044	0.16251	0.421717	8.83903	0.935348	0.394649	0.834884	0.892591	2144.36	29.8502		2321.53	16.7233	2481.2	13.9418		2481.2	13.9418	2481.2	13.9418	2481.2	13.9418	13.5758	1.29737	x		x
258	145.501	96987.2	0.91783	0.18148	0.453883	14.4483	0.991627	0.577667	0.881654	0.889099	2939.22	40.7884		2779.61	18.4579	2665.71	14.7379		2665.71	14.7379	2665.71	14.7379	2665.71	14.7379	-10.2605	1.64708		x	x
J1714, Shell Creek Fm, Coal Creek inlier (Ediacaran), University of Arizona, n=280/315
42	17.6858	2477.65	1.36956	0.0700766	1.72393	1.63562	2.26901	0.169354	1.47528	0.650189	1008.55	26.996		984.025	28.0253	929.686	69.4101		929.686	69.4101	1008.55	26.996	1008.55	26.996	-8.48309	8.60411
22	151.26	53974.9	1.0567	0.0748266	0.934859	1.75162	1.21384	0.169853	0.774236	0.637841	1011.3	14.2033		1027.76	15.3783	1062.99	36.8231		1062.99	36.8231	1011.3	14.2033	1011.3	14.2033	4.86281	3.55622
49	211.318	36750.1	2.03138	0.0737688	0.77283	1.72968	1.47574	0.17013	1.25719	0.851909	1012.83	23.0953		1019.63	18.6107	1034.25	30.6407		1034.25	30.6407	1012.83	23.0953	1012.83	23.0953	2.07139	3.6611
259	518.291	354309	5.24238	0.0774015	0.675279	1.83005	1.70745	0.171554	1.56824	0.91847	1020.67	29.0153		1056.3	21.9745	1130.68	26.3341		1130.68	26.3341	1020.67	29.0153	1020.67	29.0153	9.72949	3.31747
290	421.88	70809.6	2.29826	0.0717348	0.836972	1.71458	1.29093	0.173427	0.982846	0.761345	1030.96	18.3536		1014	16.2276	977.52	33.394		977.52	33.394	1030.96	18.3536	1030.96	18.3536	-5.46735	4.06284
213	78.9163	12951.9	1.07188	0.0739631	1.18926	1.77829	1.61434	0.174451	1.09167	0.676234	1036.59	20.4883		1037.55	20.5647	1039.56	47.0923		1039.56	47.0923	1036.59	20.4883	1036.59	20.4883	0.286029	4.92829
124	254.534	93171.5	2.06701	0.0735123	0.919235	1.77004	1.39349	0.174707	1.04729	0.751561	1037.99	19.6799		1034.53	17.7214	1027.21	36.4754		1027.21	36.4754	1037.99	19.6799	1037.99	19.6799	-1.04973	4.06764
8	23.0569	3526.99	1.73262	0.0725992	1.86108	1.74911	2.20653	0.174813	1.1854	0.537223	1038.57	22.2866		1026.83	27.9415	1001.88	74.0248		1001.88	74.0248	1038.57	22.2866	1038.57	22.2866	-3.66226	7.97564
286	668.861	75453.9	5.63895	0.0731839	0.72624	1.77074	1.66263	0.17556	1.49563	0.899558	1042.67	28.2215		1034.79	21.1474	1018.15	28.8281		1018.15	28.8281	1042.67	28.2215	1042.67	28.2215	-2.40867	4.01135
274	179.641	33808.6	21.8919	0.073779	0.951756	1.79374	1.47781	0.176407	1.13053	0.765001	1047.31	21.4197		1043.19	18.8839	1034.53	37.7232		1034.53	37.7232	1047.31	21.4197	1047.31	21.4197	-1.23571	4.23248
144	244.063	79591.9	2.17095	0.0737771	0.983429	1.7972	1.37261	0.176752	0.957561	0.697621	1049.2	18.1727		1044.44	17.5516	1034.48	38.9767		1034.48	38.9767	1049.2	18.1727	1049.2	18.1727	-1.42358	4.20584
164	60.4026	18709.2	1.74857	0.0729745	1.06655	1.78481	1.59549	0.177463	1.18661	0.74373	1053.1	22.5967		1039.93	20.3513	1012.34	42.3583		1012.34	42.3583	1053.1	22.5967	1053.1	22.5967	-4.02585	4.89159
306	193.847	148251	1.76872	0.075454	0.852778	1.85935	1.60132	0.178799	1.35536	0.8464	1060.41	25.975		1066.75	20.724	1079.76	33.5034		1079.76	33.5034	1060.41	25.975	1060.41	25.975	1.79147	3.88239
65	110.791	48105.3	2.43851	0.0762002	0.696586	1.88772	1.21804	0.17975	0.999196	0.82033	1065.61	19.2355		1076.78	15.8467	1099.48	27.3169		1099.48	27.3169	1065.61	19.2355	1065.61	19.2355	3.0811	2.97642
214	72.8452	56456.1	1.38712	0.0772929	1.14427	1.92012	1.6685	0.180251	1.21431	0.727786	1068.34	23.4319		1088.11	21.8352	1127.89	44.6647		1127.89	44.6647	1068.34	23.4319	1068.34	23.4319	5.2794	4.28785
255	199.292	67356.6	4.15089	0.0764105	1.07643	1.91087	1.53735	0.181453	1.0976	0.713957	1074.91	21.2994		1084.89	20.0854	1104.99	42.1968		1104.99	42.1968	1074.91	21.2994	1074.91	21.2994	2.72233	4.18511
241	47.1933	3859.22	1.67926	0.0722501	1.1659	1.80812	1.80128	0.181584	1.37306	0.762266	1075.62	26.661		1048.4	23.0834	992.127	46.4655		992.127	46.4655	1075.62	26.661	1075.62	26.661	-8.41575	5.74483
188	69.7542	16884.9	2.95734	0.0757647	1.14257	1.90639	1.51005	0.182571	0.987319	0.653832	1081.01	19.2592		1083.32	19.7129	1087.97	44.8464		1087.97	44.8464	1081.01	19.2592	1081.01	19.2592	0.639991	4.46182
220	445.183	76327.6	3.98675	0.0802817	0.921823	2.04433	1.61132	0.184766	1.32159	0.82019	1092.96	26.0412		1130.41	21.535	1203.04	35.5661		1203.04	35.5661	1092.96	26.0412	1092.96	26.0412	9.14998	3.44955
117	358.028	107553	3.45047	0.0766734	0.860721	1.95503	1.38021	0.18501	1.07895	0.781729	1094.29	21.2838		1100.18	18.1733	1111.82	33.6869		1111.82	33.6869	1094.29	21.2838	1094.29	21.2838	1.57703	3.54366
10	31.4982	23467.7	3.37932	0.0770631	1.41928	1.97637	1.85607	0.186084	1.19608	0.644418	1100.13	23.7099		1107.48	24.5292	1121.97	55.4401		1121.97	55.4401	1100.13	23.7099	1100.13	23.7099	1.94739	5.28587
143	39.413	12261.4	2.8245	0.0759127	1.25475	1.94859	1.87089	0.186249	1.38775	0.741757	1101.02	27.5298		1097.96	24.6073	1091.92	49.2583		1091.92	49.2583	1101.02	27.5298	1101.02	27.5298	-0.833757	5.20078
168	177.87	75696.1	4.4715	0.0747961	0.888709	1.92841	1.47952	0.187072	1.18287	0.799495	1105.49	23.5528		1090.99	19.3905	1062.17	35.0424		1062.17	35.0424	1105.49	23.5528	1105.49	23.5528	-4.07875	4.08745
277	219.514	756642	2.1723	0.0781809	0.834529	2.02559	1.31745	0.187991	1.01943	0.773789	1110.48	20.3824		1124.14	17.5538	1150.59	32.4422		1150.59	32.4422	1110.48	20.3824	1110.48	20.3824	3.4857	3.24711
308	191.272	24753.4	2.33371	0.0778522	0.898065	2.03496	1.42134	0.189659	1.10167	0.775095	1119.53	22.1911		1127.28	18.9671	1142.22	34.9935		1142.22	34.9935	1119.53	22.1911	1119.53	22.1911	1.98676	3.57647
270	41.4165	8319.18	1.64281	0.0773463	1.45145	2.0401	1.94409	0.191381	1.29335	0.665275	1128.85	26.2507		1128.99	25.9651	1129.26	56.6565		1129.26	56.6565	1128.85	26.2507	1128.85	26.2507	0.0363548	5.52782
2	135.409	99526.3	1.24477	0.0756617	1.05866	1.9982	1.68055	0.191624	1.30518	0.776638	1130.17	26.5189		1114.9	22.2912	1085.24	41.5647		1085.24	41.5647	1130.17	26.5189	1130.17	26.5189	-4.13974	4.67756
29	127.94	70104.3	3.73914	0.0783061	1.07237	2.07298	1.62626	0.192082	1.2226	0.751785	1132.64	24.8908		1139.92	21.8338	1153.77	41.7504		1153.77	41.7504	1132.64	24.8908	1132.64	24.8908	1.83098	4.15613
31	341.922	51966.5	2.49145	0.08331	1.08803	2.20921	1.58647	0.19241	1.15459	0.727772	1134.42	23.5398		1183.96	21.7357	1275.62	41.5518		1275.62	41.5518	1134.42	23.5398	1134.42	23.5398	11.0696	3.43465
304	361.25	347519	1.66631	0.0776447	0.82817	2.06051	1.74259	0.192553	1.53322	0.87985	1135.19	31.2789		1135.79	23.3497	1136.95	32.2639		1136.95	32.2639	1135.19	31.2789	1135.19	31.2789	0.154643	3.94927
4	348.889	66059	4.2076	0.0778143	0.732139	2.06798	1.46982	0.19283	1.2745	0.867111	1136.69	26.0322		1138.26	19.7178	1141.27	28.5293		1141.27	28.5293	1136.69	26.0322	1136.69	26.0322	0.401762	3.37663
28	152.66	121021	2.98093	0.0785215	0.873896	2.09397	1.38654	0.193495	1.07647	0.776374	1140.28	22.0509		1146.83	18.676	1159.22	34.0041		1159.22	34.0041	1140.28	22.0509	1140.28	22.0509	1.63363	3.45604
261	16.2754	3497.94	5.34165	0.072897	2.11205	1.9499	2.49815	0.194085	1.33417	0.534063	1143.46	27.3995		1098.41	32.8662	1010.19	83.9723		1010.19	83.9723	1143.46	27.3995	1143.46	27.3995	-13.193	9.79233
302	78.8974	37575.3	2.13925	0.0788303	1.03038	2.12234	1.53673	0.195348	1.14011	0.741908	1150.28	23.5417		1156.1	20.789	1167	39.9776		1167	39.9776	1150.28	23.5417	1150.28	23.5417	1.43222	3.93333
297	133.002	56368.9	1.16783	0.0783301	0.845737	2.11118	1.49842	0.195562	1.23693	0.825489	1151.44	25.5643		1152.46	20.2365	1154.38	32.9314		1154.38	32.9314	1151.44	25.5643	1151.44	25.5643	0.254722	3.60569
238	413.541	46440.5	2.48479	0.0790019	0.925883	2.13784	1.46168	0.196348	1.13104	0.773794	1155.67	23.4543		1161.13	19.8197	1171.34	35.9444		1171.34	35.9444	1155.67	23.4543	1155.67	23.4543	1.33751	3.62985
194	240.53	1.1161e+06	1.561	0.0781693	0.801475	2.12955	1.33418	0.197669	1.06662	0.799457	1162.79	22.2427		1158.44	18.0684	1150.3	31.1583		1150.3	31.1583	1162.79	22.2427	1162.79	22.2427	-1.08571	3.35206
35	203.653	55534.7	3.07762	0.0797409	1.05164	2.19789	1.50436	0.199992	1.07571	0.715062	1175.28	22.652		1180.37	20.5777	1189.72	40.6703		1189.72	40.6703	1175.28	22.652	1175.28	22.652	1.21411	3.87672
271	117.563	54355.8	2.05873	0.0820068	0.976883	2.37734	1.39423	0.210343	0.994775	0.713494	1230.65	21.8434		1235.81	19.5322	1244.85	37.5405		1244.85	37.5405	1244.85	37.5405	1230.65	21.8434	1.14059	3.45934
132	271.073	124598	1.78103	0.0834106	0.697277	2.4297	1.30886	0.211358	1.10766	0.846282	1236.05	24.4191		1251.43	18.4539	1277.97	26.6072		1277.97	26.6072	1277.97	26.6072	1236.05	24.4191	3.28066	2.77595
66	79.6523	16599	0.84587	0.0825599	0.924245	2.44534	1.42044	0.214911	1.07862	0.759357	1254.93	24.1078		1256.05	20.0646	1258	35.416		1258	35.416	1258	35.416	1254.93	24.1078	0.243936	3.39993
266	42.4818	12150.7	1.84309	0.0834334	0.993011	2.52107	1.44196	0.219247	1.04556	0.725092	1277.89	23.7555		1278.13	20.5478	1278.51	37.9397		1278.51	37.9397	1278.51	37.9397	1277.89	23.7555	0.0481551	3.49999
105	50.6506	9928.47	1.64448	0.086534	1.00334	2.63043	1.48648	0.22056	1.09678	0.737838	1284.84	25.0416		1309.19	21.4353	1349.28	37.9556		1349.28	37.9556	1349.28	37.9556	1284.84	25.0416	4.77625	3.25879
244	78.4218	31470.7	3.64345	0.0851008	1.1251	2.59134	1.52019	0.220942	1.02231	0.672488	1286.85	23.3743		1298.19	21.8307	1316.98	42.7534		1316.98	42.7534	1316.98	42.7534	1286.85	23.3743	2.28754	3.63485
72	372.435	60872.7	2.24495	0.0848369	0.956751	2.58632	1.48208	0.2212	1.13189	0.76372	1288.21	25.9047		1296.77	21.2719	1310.95	36.389		1310.95	36.389	1310.95	36.389	1288.21	25.9047	1.7346	3.36817
64	120.529	52121.8	2.34466	0.0854829	1.09631	2.61164	1.47387	0.221678	0.985092	0.66837	1290.73	22.5849		1303.92	21.2115	1325.66	41.6097		1325.66	41.6097	1325.66	41.6097	1290.73	22.5849	2.63424	3.49891
269	245.831	79942.6	2.23074	0.0864532	1.0753	2.65053	1.58239	0.222454	1.1609	0.733638	1294.83	26.6917		1314.79	22.8662	1347.48	40.6874		1347.48	40.6874	1347.48	40.6874	1294.83	26.6917	3.90742	3.51322
54	520.755	60726.3	2.58506	0.0836826	0.704932	2.56818	1.8508	0.222678	1.7113	0.924625	1296.01	39.3791		1291.62	26.5124	1284.32	26.9103		1284.32	26.9103	1284.32	26.9103	1296.01	39.3791	-0.910281	3.72449
175	323.321	66337.2	3.2666	0.0876743	0.878273	2.7004	1.44764	0.223483	1.15079	0.794938	1300.25	26.5592		1328.57	21.0254	1374.5	33.1083		1374.5	33.1083	1374.5	33.1083	1300.25	26.5592	5.40201	2.98762
262	602.641	70831.9	2.33484	0.0903949	0.767952	2.79735	1.59274	0.224538	1.39538	0.876085	1305.81	32.3285		1354.83	23.3517	1433.04	28.7174		1433.04	28.7174	1433.04	28.7174	1305.81	32.3285	8.87816	2.90236
12	323.352	291722	2.89646	0.0876748	0.738886	2.72135	1.39383	0.225215	1.18186	0.847927	1309.37	27.4491		1334.3	20.2859	1374.51	27.8541		1374.51	27.8541	1374.51	27.8541	1309.37	27.4491	4.73913	2.77752
26	71.5288	51236.9	2.63681	0.0869278	1.12218	2.7097	1.56292	0.226178	1.08787	0.696045	1314.44	25.354		1331.12	22.7209	1358.04	42.4003		1358.04	42.4003	1358.04	42.4003	1314.44	25.354	3.21048	3.55213
34	163.514	187741	2.86423	0.0863328	0.737381	2.69306	1.33174	0.226339	1.10897	0.832719	1315.28	25.8608		1326.55	19.3277	1344.79	27.9101		1344.79	27.9101	1344.79	27.9101	1315.28	25.8608	2.19419	2.79616
165	256.77	70712.4	2.74193	0.0871552	0.957521	2.72745	1.41396	0.227065	1.0404	0.735805	1319.1	24.3252		1335.96	20.5912	1363.07	36.1519		1363.07	36.1519	1363.07	36.1519	1319.1	24.3252	3.22597	3.12611
39	103.637	28087.5	2.50688	0.0852153	1.07928	2.66759	1.71658	0.227138	1.33484	0.777617	1319.48	31.2177		1319.53	24.8491	1319.58	40.9989		1319.58	40.9989	1319.58	40.9989	1319.48	31.2177	0.00763341	3.90492
43	75.2007	61307.8	1.14079	0.0868209	1.03099	2.72867	1.54912	0.228042	1.15622	0.74637	1324.23	27.1279		1336.3	22.5625	1355.66	38.9676		1355.66	38.9676	1355.66	38.9676	1324.23	27.1279	2.31874	3.44789
237	119.277	91953.2	2.14572	0.0870766	0.841617	2.74935	1.36898	0.229095	1.07972	0.788702	1329.75	25.4282		1341.91	19.9789	1361.33	31.7836		1361.33	31.7836	1361.33	31.7836	1329.75	25.4282	2.31976	2.94789
102	132.794	33246.2	1.6194	0.0855695	0.927697	2.70326	1.57655	0.229222	1.27471	0.808545	1330.42	30.034		1329.35	22.9043	1327.62	35.1999		1327.62	35.1999	1327.62	35.1999	1330.42	30.034	-0.211231	3.48958
135	87.556	33808.5	3.40255	0.0850915	0.850639	2.68931	1.43896	0.229321	1.16061	0.806561	1330.94	27.355		1325.52	20.8759	1316.76	32.3256		1316.76	32.3256	1316.76	32.3256	1330.94	27.355	-1.07632	3.23618
126	65.4779	70280	2.55035	0.0869447	0.922224	2.75165	1.34212	0.229635	0.975082	0.726525	1332.58	23.0079		1342.53	19.5912	1358.41	34.8414		1358.41	34.8414	1358.41	34.8414	1332.58	23.0079	1.90129	3.03307
257	84.7069	19378.8	2.88388	0.0851911	0.967919	2.69843	1.47989	0.229829	1.11946	0.756452	1333.6	26.4329		1328.03	21.4895	1319.03	36.77		1319.03	36.77	1319.03	36.77	1333.6	26.4329	-1.10488	3.45826
193	88.8779	95157.1	3.04879	0.084785	0.874313	2.69074	1.4184	0.230272	1.11688	0.787426	1335.92	26.4132		1325.91	20.5806	1309.76	33.2573		1309.76	33.2573	1309.76	33.2573	1335.92	26.4132	-1.99716	3.28244
174	153.791	39474.3	2.53098	0.0858562	0.797159	2.72718	1.39316	0.230478	1.14256	0.820118	1337	27.0401		1335.89	20.2878	1334.09	30.219		1334.09	30.219	1334.09	30.219	1337	27.0401	-0.218693	3.04327
293	153.767	732940	2.01876	0.0863808	0.966947	2.75027	1.68483	0.231018	1.37973	0.818915	1339.83	32.7153		1342.16	24.591	1345.86	36.5961		1345.86	36.5961	1345.86	36.5961	1339.83	32.7153	0.447748	3.63822
156	131.384	53484.5	3.67374	0.0892253	0.991144	2.84409	1.61849	0.231283	1.2795	0.790556	1341.22	30.367		1367.25	23.8323	1408.15	37.1893		1408.15	37.1893	1408.15	37.1893	1341.22	30.367	4.75308	3.31334
254	134.16	45517.2	1.06064	0.0873026	0.698961	2.79336	1.25616	0.23216	1.04374	0.830898	1345.81	24.8478		1353.76	18.4097	1366.33	26.3786		1366.33	26.3786	1366.33	26.3786	1345.81	24.8478	1.50187	2.63124
283	170.846	64508.3	1.94183	0.0849533	0.889728	2.7186	1.45096	0.232195	1.14616	0.789929	1345.99	27.2893		1333.55	21.1118	1313.61	33.827		1313.61	33.827	1313.61	33.827	1345.99	27.2893	-2.46537	3.35827
268	190.616	150540	3.76984	0.0855055	0.968476	2.74749	1.68308	0.233147	1.37653	0.81786	1350.97	32.8832		1341.41	24.5589	1326.17	36.754		1326.17	36.754	1326.17	36.754	1350.97	32.8832	-1.87014	3.75754
50	130.281	180581	2.61201	0.0881273	0.906615	2.84007	1.37257	0.233833	1.03053	0.750805	1354.56	24.6767		1366.19	20.2034	1384.41	34.1277		1384.41	34.1277	1384.41	34.1277	1354.56	24.6767	2.15607	2.99916
204	287.963	51425.3	1.45756	0.0910277	0.922587	2.93908	1.66465	0.234275	1.38561	0.832369	1356.86	33.2299		1392.04	24.72	1446.34	34.4381		1446.34	34.4381	1446.34	34.4381	1356.86	33.2299	6.18606	3.20442
197	76.4982	36397.3	3.33882	0.0887212	0.875283	2.88578	1.26495	0.236006	0.913223	0.721944	1365.9	22.032		1378.2	18.6963	1397.29	32.8903		1397.29	32.8903	1397.29	32.8903	1365.9	22.032	2.24667	2.78938
86	47.8144	5194.85	1.16026	0.0843188	0.942126	2.75689	1.38275	0.237238	1.01213	0.731967	1372.32	24.5212		1343.95	20.1947	1299.05	35.8928		1299.05	35.8928	1299.05	35.8928	1372.32	24.5212	-5.6399	3.47601
285	348.61	349755	2.78707	0.0870612	0.749057	2.87345	1.26402	0.239479	1.01816	0.805496	1383.99	24.8553		1374.98	18.662	1360.99	28.2896		1360.99	28.2896	1360.99	28.2896	1383.99	24.8553	-1.68961	2.7934
51	130.108	40948.4	1.49439	0.0898925	0.958115	2.97147	1.60375	0.239848	1.28609	0.801926	1385.91	31.435		1400.35	23.8816	1422.4	35.8804		1422.4	35.8804	1422.4	35.8804	1385.91	31.435	2.56537	3.30529
74	93.4238	139574	5.18421	0.0909899	0.993266	3.02975	1.63814	0.241602	1.30266	0.795207	1395.02	32.0276		1415.14	24.5125	1445.54	37.0805		1445.54	37.0805	1445.54	37.0805	1395.02	32.0276	3.49495	3.32221
113	464.895	76423.1	4.74011	0.0911639	0.8588	3.0459	1.40964	0.242427	1.11783	0.792991	1399.3	27.5588		1419.2	21.1208	1449.18	32.0447		1449.18	32.0447	1449.18	32.0447	1399.3	27.5588	3.44212	2.85921
208	107.45	49733.8	4.11028	0.088426	0.802687	2.97175	1.30689	0.243848	1.03134	0.789153	1406.67	25.5462		1400.42	19.4612	1390.9	30.1886		1390.9	30.1886	1390.9	30.1886	1406.67	25.5462	-1.13366	2.86209
253	132.161	67525.2	2.43168	0.090878	0.839346	3.06523	1.42298	0.244733	1.14907	0.807511	1411.25	28.5455		1424.04	21.354	1443.2	31.3441		1443.2	31.3441	1443.2	31.3441	1411.25	28.5455	2.21358	2.90217
139	68.1977	62821.9	1.1002	0.0905027	0.951068	3.06118	1.58306	0.245423	1.26552	0.799416	1414.83	31.5097		1423.03	23.7488	1435.31	35.5543		1435.31	35.5543	1435.31	35.5543	1414.83	31.5097	1.42714	3.28354
235	157.833	1.95326e+06	1.11269	0.0945442	0.923522	3.20464	1.35114	0.245942	0.986242	0.729936	1417.51	24.5976		1458.28	20.4951	1518.17	34.1401		1518.17	34.1401	1518.17	34.1401	1417.51	24.5976	6.63022	2.65211
24	48.7728	11199.7	2.78231	0.0891815	1.19332	3.0261	1.63237	0.246205	1.11383	0.682342	1418.87	27.8036		1414.22	24.4188	1407.21	44.7812		1407.21	44.7812	1407.21	44.7812	1418.87	27.8036	-0.82881	3.76818
138	102.673	20284.6	3.21174	0.092037	0.987411	3.12962	1.42508	0.246727	1.02756	0.721053	1421.57	25.6938		1440	21.4944	1467.3	36.7541		1467.3	36.7541	1467.3	36.7541	1421.57	25.6938	3.11659	2.9926
169	362.41	153883	3.67148	0.0905903	0.914288	3.08061	1.4013	0.246742	1.06195	0.757827	1421.65	26.5548		1427.88	21.0546	1437.16	34.1707		1437.16	34.1707	1437.16	34.1707	1421.65	26.5548	1.07887	2.991
163	135.932	462547	3.60962	0.0915982	1.01844	3.13181	1.53504	0.248083	1.14853	0.74821	1428.58	28.8451		1440.54	23.1569	1458.22	37.9555		1458.22	37.9555	1458.22	37.9555	1428.58	28.8451	2.03279	3.22724
149	84.6183	53000.2	2.44015	0.0909675	0.991304	3.11251	1.5615	0.248263	1.20649	0.772644	1429.51	30.3183		1435.79	23.5209	1445.08	37.0096		1445.08	37.0096	1445.08	37.0096	1429.51	30.3183	1.07694	3.28944
108	353.018	91841.6	2.42673	0.0911796	0.796024	3.12211	1.30944	0.24845	1.0397	0.794003	1430.48	26.1426		1438.15	19.7384	1449.51	29.7009		1449.51	29.7009	1449.51	29.7009	1430.48	26.1426	1.31295	2.70958
68	110.972	67230.2	2.11687	0.0886464	0.996866	3.03548	1.4201	0.248458	1.01141	0.712209	1430.52	25.4321		1416.59	21.2596	1395.68	37.4675		1395.68	37.4675	1395.68	37.4675	1430.52	25.4321	-2.49635	3.30022
17	75.9021	12132.6	2.47975	0.0911736	0.697037	3.12929	1.13699	0.249038	0.898272	0.790042	1433.51	22.6294		1439.92	17.1485	1449.38	26.0079		1449.38	26.0079	1449.38	26.0079	1433.51	22.6294	1.09523	2.36378
71	289.298	48474.1	2.08659	0.090942	0.773793	3.12494	1.43913	0.249325	1.2134	0.843148	1434.99	30.5963		1438.85	21.6984	1444.54	28.8908		1444.54	28.8908	1444.54	28.8908	1434.99	30.5963	0.661005	2.90405
41	407.302	68980.4	2.72239	0.0899624	0.907397	3.09394	1.4225	0.249539	1.09551	0.770129	1436.1	27.6426		1431.19	21.3957	1423.88	33.9741		1423.88	33.9741	1423.88	33.9741	1436.1	27.6426	-0.857875	3.09194
112	149.9	104768	1.72221	0.0920294	0.871869	3.16772	1.62919	0.249751	1.37627	0.844754	1437.19	34.7506		1449.33	24.645	1467.15	32.4538		1467.15	32.4538	1467.15	32.4538	1437.19	34.7506	2.04173	3.21021
292	77.5426	23563.4	3.9677	0.0922607	0.923562	3.17612	1.47197	0.249786	1.14618	0.778672	1437.37	28.9442		1451.37	22.2807	1471.91	34.356		1471.91	34.356	1471.91	34.356	1437.37	28.9442	2.34689	3.01035
37	128.621	915573	1.9886	0.0930494	0.837567	3.21282	1.45092	0.25053	1.18476	0.816556	1441.21	29.9895		1460.25	22.0222	1488.05	31.0897		1488.05	31.0897	1488.05	31.0897	1441.21	29.9895	3.14797	2.85592
177	235.27	647459	2.80711	0.0908696	0.725332	3.13868	1.19687	0.25062	0.95205	0.795448	1441.67	24.106		1442.23	18.0647	1443.02	27.0869		1443.02	27.0869	1443.02	27.0869	1441.67	24.106	0.0936398	2.51148
198	391.258	72067.7	3.40346	0.0893319	0.899451	3.08607	1.51456	0.250661	1.21856	0.804562	1441.88	30.858		1429.24	22.7662	1410.44	33.7381		1410.44	33.7381	1410.44	33.7381	1441.88	30.858	-2.22971	3.28123
305	558.03	74454.3	2.10451	0.0963563	0.982277	3.35563	2.0585	0.252687	1.80902	0.878805	1452.32	46.1062		1494.11	31.5643	1553.89	36.1445		1553.89	36.1445	1553.89	36.1445	1452.32	46.1062	6.53705	3.67834
176	85.4275	17008.2	2.65958	0.0930789	1.18351	3.2442	1.73762	0.252898	1.27225	0.732181	1453.4	32.4472		1467.79	26.4349	1488.65	43.928		1488.65	43.928	1488.65	43.928	1453.4	32.4472	2.36788	3.6126
183	242.178	82875.8	2.39433	0.0920906	0.691549	3.22705	1.11414	0.25426	0.873538	0.784046	1460.41	22.3742		1463.68	16.928	1468.41	25.7372		1468.41	25.7372	1468.41	25.7372	1460.41	22.3742	0.545022	2.31523
278	183.526	45861.1	2.63377	0.0929005	0.824243	3.27096	1.29452	0.255473	0.998195	0.771095	1466.64	25.6642		1474.17	19.7314	1485.02	30.6075		1485.02	30.6075	1485.02	30.6075	1466.64	25.6642	1.23753	2.67026
127	519.891	140442	4.08455	0.0913757	0.643083	3.2174	1.54263	0.255483	1.4022	0.908964	1466.69	36.0526		1461.36	23.4223	1453.6	23.9811		1453.6	23.9811	1453.6	23.9811	1466.69	36.0526	-0.900834	2.98707
227	255.559	44735.2	3.60584	0.0931956	0.794644	3.28887	1.25973	0.256059	0.977473	0.77594	1469.64	25.1773		1478.42	19.2256	1491.02	29.4846		1491.02	29.4846	1491.02	29.4846	1469.64	25.1773	1.4339	2.57884
178	218.561	74862	1.64953	0.0923341	0.799108	3.2608	1.47964	0.256241	1.24529	0.84162	1470.58	32.0939		1471.75	22.5368	1473.42	29.7203		1473.42	29.7203	1473.42	29.7203	1470.58	32.0939	0.19263	2.96606
33	405.496	260668	2.82028	0.0923579	0.766836	3.26331	1.2621	0.256373	1.00243	0.794252	1471.26	25.8452		1472.35	19.2267	1473.91	28.5181		1473.91	28.5181	1473.91	28.5181	1471.26	25.8452	0.180014	2.60864
313	127.067	115287	2.12948	0.0922432	0.908146	3.3691	1.4493	0.265013	1.12949	0.779333	1515.44	29.8971		1497.24	22.2426	1471.55	33.7842		1471.55	33.7842	1471.55	33.7842	1471.55	33.7842	-2.98221	3.11729
146	70.8523	33507.3	1.80671	0.0921963	0.91718	3.26551	1.37401	0.256995	1.02308	0.744592	1474.45	26.4287		1472.88	20.935	1470.59	34.1247		1470.59	34.1247	1470.59	34.1247	1474.45	26.4287	-0.26249	2.93984
97	329.809	392767	3.71989	0.09461	0.976472	3.35337	1.5831	0.257177	1.24607	0.787111	1475.38	32.2073		1493.58	24.2701	1519.48	36.0915		1519.48	36.0915	1519.48	36.0915	1475.38	32.2073	2.90237	3.13239
195	220.472	120551	1.27115	0.0923795	0.915308	3.28269	1.57096	0.257835	1.27676	0.812729	1478.75	33.0677		1476.96	23.9654	1474.36	34.0378		1474.36	34.0378	1474.36	34.0378	1478.75	33.0677	-0.298299	3.22369
229	278.403	70333.3	1.56667	0.0940445	0.631328	3.3428	1.23593	0.257908	1.06252	0.859693	1479.13	27.5251		1491.11	18.9336	1508.17	23.3713		1508.17	23.3713	1508.17	23.3713	1479.13	27.5251	1.92548	2.37501
145	295.112	1.0013e+06	1.97041	0.0921346	0.62886	3.28147	1.07355	0.258424	0.870082	0.810472	1481.77	22.5757		1476.67	16.3754	1469.32	23.4012		1469.32	23.4012	1469.32	23.4012	1481.77	22.5757	-0.847673	2.22272
116	338.916	123586	0.797165	0.0941723	0.867558	3.35526	1.31183	0.258518	0.983994	0.750092	1482.26	25.5387		1494.02	20.1137	1510.74	32.1026		1510.74	32.1026	1510.74	32.1026	1482.26	25.5387	1.88513	2.68413
273	128.145	53129.1	1.23017	0.0923346	0.907034	3.30195	1.49177	0.259474	1.18434	0.793916	1487.15	30.8287		1481.51	22.7882	1473.43	33.7343		1473.43	33.7343	1473.43	33.7343	1487.15	30.8287	-0.930943	3.11731
201	238.678	301878	3.63428	0.0939288	0.996061	3.36682	1.5691	0.260081	1.21241	0.772679	1490.26	31.6181		1496.71	24.0776	1505.85	36.8823		1505.85	36.8823	1505.85	36.8823	1490.26	31.6181	1.03528	3.20688
57	171.042	44438.8	2.7468	0.0970049	0.89032	3.49521	1.36887	0.261437	1.03978	0.759588	1497.19	27.228		1526.13	21.183	1566.48	32.7034		1566.48	32.7034	1566.48	32.7034	1497.19	27.228	4.42325	2.64626
166	255.451	76621.8	0.896782	0.0938281	0.879952	3.45323	1.40637	0.267043	1.09707	0.780073	1525.77	29.2147		1516.61	21.7047	1503.82	32.5944		1503.82	32.5944	1503.82	32.5944	1503.82	32.5944	-1.46005	2.93429
249	340.478	105484	3.57551	0.0943738	1.73402	3.55408	2.86929	0.273252	2.28605	0.796729	1557.29	61.9887		1539.34	44.5718	1514.77	64.137		1514.77	64.137	1514.77	64.137	1514.77	64.137	-2.80695	5.97453
7	231.159	208045	4.43059	0.0952617	0.871908	3.52818	1.55809	0.268733	1.29129	0.828762	1534.37	34.558		1533.55	24.1617	1532.42	32.1711		1532.42	32.1711	1532.42	32.1711	1532.42	32.1711	-0.127334	3.08289
247	192.858	57045.5	1.11793	0.0957009	0.987134	3.45631	1.52372	0.26205	1.16073	0.761773	1500.32	30.4519		1517.31	23.5206	1541.07	36.3847		1541.07	36.3847	1541.07	36.3847	1541.07	36.3847	2.64415	3.03118
191	399.621	138752	4.75927	0.0959073	0.920916	3.71836	1.37496	0.281312	1.021	0.742564	1597.96	28.3225		1575.33	21.5652	1545.12	33.9257		1545.12	33.9257	1545.12	33.9257	1545.12	33.9257	-3.41995	2.91828
228	124.671	60864.5	1.01845	0.0962607	0.946721	3.63436	1.42361	0.273947	1.06319	0.746829	1560.81	28.8869		1557.09	22.2194	1552.03	34.8446		1552.03	34.8446	1552.03	34.8446	1552.03	34.8446	-0.565339	2.92606
234	292.515	86509.9	0.970639	0.0968162	0.962114	3.55835	1.41637	0.266679	1.03944	0.733878	1523.92	27.6501		1540.3	22.005	1562.83	35.3579		1562.83	35.3579	1562.83	35.3579	1562.83	35.3579	2.48952	2.82791
136	188.258	36167.7	1.61043	0.0971747	0.858957	3.5528	1.39496	0.265281	1.09914	0.787935	1516.8	29.1169		1539.06	21.6649	1569.76	31.5377		1569.76	31.5377	1569.76	31.5377	1569.76	31.5377	3.37341	2.685
23	179.926	68078.1	1.60236	0.0973874	1.00526	3.66561	1.58291	0.273106	1.22272	0.77245	1556.55	33.1411		1563.91	24.7515	1573.85	36.8906		1573.85	36.8906	1573.85	36.8906	1573.85	36.8906	1.09952	3.1318
91	103.741	33020.2	1.47496	0.0975371	0.938232	3.73919	1.47875	0.278161	1.14299	0.772943	1582.09	31.4288		1579.8	23.2206	1576.72	34.4174		1576.72	34.4174	1576.72	34.4174	1576.72	34.4174	-0.340521	2.96151
133	101.604	20796.5	2.65752	0.0976189	0.857838	3.70534	1.41613	0.275411	1.12674	0.795647	1568.21	30.7419		1572.52	22.1945	1578.29	31.4615		1578.29	31.4615	1578.29	31.4615	1578.29	31.4615	0.638726	2.77793
224	48.8728	67059.6	1.4194	0.0976301	1.14103	3.80772	1.50802	0.282989	0.985997	0.653835	1606.4	27.4788		1594.38	23.7706	1578.51	41.8479		1578.51	41.8479	1578.51	41.8479	1578.51	41.8479	-1.76686	3.21082
287	156.231	74695.6	1.09671	0.097708	0.814966	3.77732	1.31416	0.280505	1.03094	0.784488	1593.91	28.5344		1587.94	20.6799	1580	29.8823		1580	29.8823	1580	29.8823	1580	29.8823	-0.880133	2.62712
161	214.287	87768.2	1.06121	0.098075	0.721775	3.78883	1.22945	0.280308	0.99528	0.809534	1592.91	27.5322		1590.38	19.3591	1587.01	26.4407		1587.01	26.4407	1587.01	26.4407	1587.01	26.4407	-0.371872	2.4096
192	128.004	282261	1.28844	0.098426	1.04627	3.73708	1.55588	0.275493	1.15155	0.740129	1568.62	31.4261		1579.35	24.4289	1593.69	38.2965		1593.69	38.2965	1593.69	38.2965	1593.69	38.2965	1.57261	3.07941
187	146.54	113074	1.76341	0.098483	0.860578	3.81152	1.24396	0.280818	0.898242	0.722083	1595.48	24.8832		1595.18	19.612	1594.77	31.4975		1594.77	31.4975	1594.77	31.4975	1594.77	31.4975	-0.0447986	2.51771
310	395.258	95645.2	1.25185	0.0988216	0.6721	3.81968	1.33702	0.280455	1.15582	0.864471	1593.65	31.9862		1596.9	21.0887	1601.17	24.5784		1601.17	24.5784	1601.17	24.5784	1601.17	24.5784	0.469803	2.51494
294	188.171	139269	1.87122	0.0988453	0.87503	3.94394	1.49358	0.289509	1.21041	0.810411	1639.08	34.3357		1622.75	23.7133	1601.62	31.9979		1601.62	31.9979	1601.62	31.9979	1601.62	31.9979	-2.33866	2.96246
212	377.2	152550	0.996233	0.099359	0.862824	3.89392	1.37577	0.28436	1.07158	0.778894	1613.28	29.9765		1612.42	21.7861	1611.29	31.5088		1611.29	31.5088	1611.29	31.5088	1611.29	31.5088	-0.123853	2.70085
128	161.242	30589.6	1.29504	0.0999771	0.573425	3.93186	1.12853	0.285355	0.971988	0.861288	1618.28	27.2645		1620.26	17.906	1622.83	20.9079		1622.83	20.9079	1622.83	20.9079	1622.83	20.9079	0.280519	2.11499
230	60.5191	65658.2	1.03892	0.100224	0.880008	3.92142	1.46374	0.283895	1.16966	0.799094	1610.95	32.6786		1618.11	23.2125	1627.42	32.0695		1627.42	32.0695	1627.42	32.0695	1627.42	32.0695	1.01233	2.79946
242	62.3119	71792.7	1.39485	0.100229	0.800216	3.80745	1.32892	0.275631	1.06098	0.798377	1569.32	28.9657		1594.32	20.9469	1627.51	29.161		1627.51	29.161	1627.51	29.161	1627.51	29.161	3.57541	2.48041
282	265.208	40261.8	2.08291	0.100256	0.904698	3.94245	1.34564	0.285328	0.996129	0.740263	1618.14	27.9396		1622.44	21.3627	1628.01	32.9669		1628.01	32.9669	1628.01	32.9669	1628.01	32.9669	0.606202	2.64505
114	181.807	93924.5	0.679505	0.100383	0.792513	3.9554	1.24565	0.285904	0.961025	0.771504	1621.03	26.9973		1625.1	19.7883	1630.36	28.8697		1630.36	28.8697	1630.36	28.8697	1630.36	28.8697	0.572417	2.41699
296	125.912	39598.4	3.94482	0.100464	0.67946	4.11231	1.35462	0.297005	1.1719	0.865108	1676.44	33.9068		1656.75	21.6866	1631.86	24.746		1631.86	24.746	1631.86	24.746	1631.86	24.746	-2.73203	2.59696
5	209.652	105819	0.825851	0.100567	0.828114	4.01948	1.43232	0.290002	1.16866	0.815921	1641.54	33.1951		1638.14	22.8273	1633.77	30.1535		1633.77	30.1535	1633.77	30.1535	1633.77	30.1535	-0.475786	2.75084
222	163.327	111575	2.9783	0.100801	0.919691	3.9646	1.51674	0.285381	1.2061	0.795191	1618.4	33.8339		1626.98	24.1065	1638.08	33.47		1638.08	33.47	1638.08	33.47	1638.08	33.47	1.20085	2.88814
100	233.14	64252.1	1.36696	0.101083	0.884515	3.85852	1.43614	0.276968	1.13143	0.787825	1576.07	31.0063		1605.05	22.6996	1643.28	32.1713		1643.28	32.1713	1643.28	32.1713	1643.28	32.1713	4.08962	2.66195
248	161.915	2.56371e+06	1.58145	0.101183	0.667848	4.10215	1.2803	0.294167	1.09231	0.853169	1662.32	31.3707		1654.73	20.4866	1645.1	24.2849		1645.1	24.2849	1645.1	24.2849	1645.1	24.2849	-1.04671	2.42102
157	176.504	75042	1.0775	0.101284	0.909438	4.05262	1.68841	0.290324	1.42255	0.842538	1643.15	40.4414		1644.83	26.9531	1646.96	33.0589		1646.96	33.0589	1646.96	33.0589	1646.96	33.0589	0.231469	3.16861
30	275.241	96143.5	1.17145	0.101347	0.871472	4.04558	1.28468	0.289641	0.943902	0.734734	1639.73	26.7851		1643.41	20.5006	1648.1	31.674		1648.1	31.674	1648.1	31.674	1648.1	31.674	0.507553	2.50946
47	224.564	148680	1.57206	0.101483	1.02506	4.04635	1.42753	0.289306	0.993518	0.695972	1638.06	28.1678		1643.57	22.7811	1650.59	37.2453		1650.59	37.2453	1650.59	37.2453	1650.59	37.2453	0.759227	2.81547
77	145.977	61578.8	1.09695	0.10157	0.803476	3.92672	1.20712	0.280511	0.900868	0.746296	1593.94	24.9346		1619.2	19.1479	1652.19	29.187		1652.19	29.187	1652.19	29.187	1652.19	29.187	3.52566	2.27645
158	148.586	24077.3	3.58245	0.101667	0.686543	4.03214	1.17868	0.287769	0.958094	0.812853	1630.37	27.0513		1640.7	18.7965	1653.95	24.9331		1653.95	24.9331	1653.95	24.9331	1653.95	24.9331	1.42582	2.2098
78	101.106	61143.5	3.84026	0.102257	0.947934	4.00859	1.36931	0.284437	0.988147	0.721638	1613.67	27.6484		1635.94	21.8113	1664.66	34.3806		1664.66	34.3806	1664.66	34.3806	1664.66	34.3806	3.06332	2.6013
184	308.056	331764	1.45885	0.102707	0.893587	3.91429	1.37139	0.27653	1.0403	0.758571	1573.86	28.4737		1616.64	21.7399	1672.78	32.3757		1672.78	32.3757	1672.78	32.3757	1672.78	32.3757	5.9136	2.49267
289	207.272	108900	1.6475	0.103504	0.81035	4.30186	1.49022	0.30157	1.25064	0.839229	1699.09	36.6124		1693.72	24.065	1687.06	29.3096		1687.06	29.3096	1687.06	29.3096	1687.06	29.3096	-0.713153	2.78769
301	320.975	111420	1.93868	0.103849	0.884142	4.25891	1.48773	0.297567	1.19651	0.804252	1679.23	34.6695		1685.46	23.9792	1693.2	31.9504		1693.2	31.9504	1693.2	31.9504	1693.2	31.9504	0.824525	2.77396
154	507.196	64663.2	2.49673	0.104446	0.745239	3.95471	1.9406	0.274733	1.7918	0.923323	1564.78	48.793		1624.96	30.8285	1703.76	26.8943		1703.76	26.8943	1703.76	26.8943	1703.76	26.8943	8.15689	3.2099
63	261.856	69529.2	1.36025	0.104854	0.725921	4.32468	1.37771	0.299265	1.17095	0.849925	1687.66	34.0779		1698.08	22.2701	1710.94	26.1733		1710.94	26.1733	1710.94	26.1733	1710.94	26.1733	1.36048	2.49881
196	169.688	97695.1	2.58574	0.105148	0.914437	4.34883	1.6318	0.300095	1.3515	0.828231	1691.78	39.4164		1702.67	26.4053	1716.08	32.9501		1716.08	32.9501	1716.08	32.9501	1716.08	32.9501	1.41613	2.97635
38	162.429	576833	1.99354	0.105633	0.75529	4.43354	1.64953	0.304537	1.46646	0.889014	1713.77	43.2543		1718.63	26.7881	1724.54	27.1893		1724.54	27.1893	1724.54	27.1893	1724.54	27.1893	0.624482	2.95731
79	228.433	60156.2	3.12288	0.105717	0.826267	4.30966	1.41562	0.29579	1.14946	0.811985	1670.4	33.1527		1695.21	22.868	1726.01	29.7389		1726.01	29.7389	1726.01	29.7389	1726.01	29.7389	3.22195	2.54358
181	91.2844	16728.7	1.69488	0.10574	1.84711	4.2046	2.30698	0.288518	1.38216	0.59912	1634.12	39.1035		1674.92	37.0952	1726.41	66.4753		1726.41	66.4753	1726.41	66.4753	1726.41	66.4753	5.34568	4.29115
88	237.418	206840	2.53391	0.10585	0.975892	4.49338	1.47568	0.308015	1.10692	0.750108	1730.93	32.9345		1729.75	24.0234	1728.3	35.1109		1728.3	35.1109	1728.3	35.1109	1728.3	35.1109	-0.152049	2.78764
312	279.121	47303.7	1.793	0.105949	0.892767	4.49696	1.36612	0.307971	1.03405	0.756924	1730.71	30.763		1730.41	22.2429	1730.03	32.1128		1730.03	32.1128	1730.03	32.1128	1730.03	32.1128	-0.0393473	2.57101
153	632.553	74780.5	17.1073	0.106113	0.79737	4.34389	1.84007	0.297027	1.65833	0.901232	1676.55	47.9837		1701.74	29.7696	1732.87	28.6707		1732.87	28.6707	1732.87	28.6707	1732.87	28.6707	3.25012	3.19842
256	760.968	200167	3.03195	0.106512	0.632643	4.02354	1.58214	0.274094	1.45015	0.916575	1561.55	39.4173		1638.97	25.2205	1739.74	22.7272		1739.74	22.7272	1739.74	22.7272	1739.74	22.7272	10.2427	2.55113
89	114.666	38453	1.39173	0.107911	0.890986	4.71575	1.33521	0.317083	0.994447	0.744788	1775.47	30.2494		1770.04	21.9245	1763.63	31.9182		1763.63	31.9182	1763.63	31.9182	1763.63	31.9182	-0.671387	2.50227
155	205.989	54750.2	1.59655	0.108504	0.869676	4.7092	1.4382	0.314912	1.14546	0.796455	1764.83	34.6616		1768.88	23.6101	1773.64	31.1126		1773.64	31.1126	1773.64	31.1126	1773.64	31.1126	0.496318	2.62027
150	179.34	45447.8	2.18356	0.108638	0.761027	4.6293	1.38947	0.309187	1.16252	0.836667	1736.7	34.6893		1754.57	22.7412	1775.89	27.2175		1775.89	27.2175	1775.89	27.2175	1775.89	27.2175	2.20672	2.4621
202	399.513	183340	3.10275	0.108643	0.925867	4.95002	1.48384	0.330591	1.15955	0.781451	1841.25	36.4008		1810.83	24.5688	1775.98	33.1136		1775.98	33.1136	1775.98	33.1136	1775.98	33.1136	-3.67472	2.81736
232	160.512	194756	1.88456	0.108655	0.74526	4.70959	1.35302	0.314501	1.12927	0.834628	1762.82	34.1376		1768.95	22.2119	1776.18	26.6526		1776.18	26.6526	1776.18	26.6526	1776.18	26.6526	0.752129	2.43144
101	162.48	490949	1.33175	0.108665	0.861904	4.65299	1.47298	0.310693	1.19448	0.810929	1744.12	35.7754		1758.83	24.13	1776.34	30.8242		1776.34	30.8242	1776.34	30.8242	1776.34	30.8242	1.81417	2.638
189	93.7662	33360	3.07543	0.108845	0.993603	4.78202	1.48891	0.318781	1.10887	0.744757	1783.77	33.867		1781.75	24.508	1779.36	35.5217		1779.36	35.5217	1779.36	35.5217	1779.36	35.5217	-0.247905	2.76183
217	329.667	463636	2.24325	0.109053	0.802155	4.67963	1.55715	0.311359	1.33464	0.857105	1747.39	40.0387		1763.6	25.5348	1782.85	28.6641		1782.85	28.6641	1782.85	28.6641	1782.85	28.6641	1.98893	2.74347
219	328.22	240462	3.66711	0.109228	0.761411	4.79141	1.34253	0.318286	1.10573	0.823617	1781.35	33.7313		1783.39	22.1058	1785.77	27.1981		1785.77	27.1981	1785.77	27.1981	1785.77	27.1981	0.247101	2.42408
119	301.152	108214	2.40163	0.109288	0.830605	4.83392	1.31609	0.320932	1.02087	0.775687	1794.28	31.3385		1790.82	21.7033	1786.77	29.6665		1786.77	29.6665	1786.77	29.6665	1786.77	29.6665	-0.420036	2.41995
15	110.758	49430	1.02935	0.109314	0.816207	4.64223	1.58407	0.308134	1.3576	0.857034	1731.52	40.405		1756.9	25.9394	1787.2	29.1507		1787.2	29.1507	1787.2	29.1507	1787.2	29.1507	3.11548	2.75835
104	130.93	574576	0.972068	0.109474	0.669997	4.73355	1.31603	0.313737	1.13271	0.860705	1759.07	34.1785		1773.2	21.6238	1789.86	23.9202		1789.86	23.9202	1789.86	23.9202	1789.86	23.9202	1.72034	2.31766
21	382.665	45066.1	1.8188	0.109602	0.788834	4.50721	1.29335	0.298384	1.02494	0.792467	1683.29	29.7608		1732.3	21.0666	1792	28.1562		1792	28.1562	1792	28.1562	1792	28.1562	6.06648	2.2218
170	309.928	137366	3.94186	0.109721	0.671086	4.85765	1.07476	0.321235	0.839494	0.7811	1795.76	25.7891		1794.94	17.7383	1793.98	23.9505		1793.98	23.9505	1793.98	23.9505	1793.98	23.9505	-0.0993521	1.96276
58	222.447	108590	2.70536	0.109901	0.803534	4.87191	1.26204	0.321651	0.973183	0.771117	1797.79	29.9252		1797.41	20.8399	1796.96	28.6671		1796.96	28.6671	1796.96	28.6671	1796.96	28.6671	-0.0460546	2.30666
137	248.252	477578	3.26067	0.109947	0.8497	4.79287	1.29884	0.316302	0.982339	0.756321	1771.64	29.8251		1783.65	21.3875	1797.71	30.3114		1797.71	30.3114	1797.71	30.3114	1797.71	30.3114	1.45012	2.3481
246	452.253	199400	2.2616	0.109971	0.746846	4.71127	1.41027	0.310848	1.19628	0.848261	1744.88	35.8429		1769.24	23.1533	1798.11	26.6408		1798.11	26.6408	1798.11	26.6408	1798.11	26.6408	2.96023	2.45777
233	242.965	109517	3.88166	0.110471	0.871377	4.85746	1.54846	0.319042	1.28001	0.826636	1785.05	39.1183		1794.91	25.557	1806.37	31.048		1806.37	31.048	1806.37	31.048	1806.37	31.048	1.18005	2.75222
84	313.887	339689	3.58706	0.110506	0.782097	4.82407	1.23705	0.316749	0.95845	0.774784	1773.83	29.1311		1789.1	20.3928	1806.95	27.8644		1806.95	27.8644	1806.95	27.8644	1806.95	27.8644	1.8326	2.2115
267	176	76760	4.35363	0.111008	0.758755	4.80035	1.44765	0.313768	1.23287	0.851638	1759.22	37.2034		1784.96	23.8445	1815.17	27.0054		1815.17	27.0054	1815.17	27.0054	1815.17	27.0054	3.08226	2.50597
16	58.8217	48401.2	0.898681	0.111638	0.845059	5.05534	1.35298	0.32857	1.05662	0.780954	1831.45	33.0169		1828.64	22.4807	1825.44	30.04		1825.44	30.04	1825.44	30.04	1825.44	30.04	-0.329048	2.44896
223	395.312	297967	2.73309	0.112066	0.784912	5.09858	1.40814	0.330115	1.16909	0.830237	1838.94	36.6605		1835.87	23.43	1832.38	27.8817		1832.38	27.8817	1832.38	27.8817	1832.38	27.8817	-0.358071	2.51689
67	75.3545	36015.1	34.3279	0.112139	0.926793	5.15564	1.52695	0.333591	1.21352	0.794735	1855.76	38.3544		1845.33	25.4533	1833.56	32.9134		1833.56	32.9134	1833.56	32.9134	1833.56	32.9134	-1.21095	2.77062
182	126.994	45066.4	2.15173	0.1122	0.810884	5.02667	1.36421	0.32507	1.09706	0.804172	1814.44	34.0051		1823.83	22.6459	1834.54	28.7967		1834.54	28.7967	1834.54	28.7967	1834.54	28.7967	1.09567	2.41787
225	103.655	76478.2	2.04259	0.112265	0.822971	5.02283	1.18259	0.324631	0.84926	0.718135	1812.31	26.2973		1823.18	19.6283	1835.6	29.2221		1835.6	29.2221	1835.6	29.2221	1835.6	29.2221	1.26905	2.1267
200	337.29	169251	2.07057	0.112286	0.712648	5.16925	1.20691	0.334033	0.974045	0.807057	1857.9	30.8161		1847.57	20.1266	1835.94	25.3036		1835.94	25.3036	1835.94	25.3036	1835.94	25.3036	-1.19627	2.18234
98	263.443	117542	1.73966	0.112529	0.713375	5.02576	1.33353	0.32406	1.12668	0.844883	1809.53	34.8412		1823.67	22.1359	1839.85	25.3173		1839.85	25.3173	1839.85	25.3173	1839.85	25.3173	1.64821	2.3276
243	184.226	96173	1.88082	0.112538	0.736281	5.00265	1.26991	0.322542	1.03468	0.814766	1802.13	31.8829		1819.77	21.0636	1840	26.1298		1840	26.1298	1840	26.1298	1840	26.1298	2.05814	2.22193
250	240.346	68867.2	1.50695	0.112586	0.655292	5.11505	1.25937	0.32965	1.07546	0.853964	1836.68	33.6887		1838.61	20.9655	1840.77	23.2534		1840.77	23.2534	1840.77	23.2534	1840.77	23.2534	0.221958	2.22219
142	194.647	53856.8	1.63075	0.112596	0.702208	4.96549	1.32951	0.319984	1.12893	0.849137	1789.65	34.5783		1813.46	22.0247	1840.92	24.9178		1840.92	24.9178	1840.92	24.9178	1840.92	24.9178	2.78511	2.29337
147	181.506	749552	1.48175	0.1126	0.95167	5.12967	1.71258	0.330551	1.42382	0.831388	1841.05	44.6929		1841.03	28.5246	1840.99	33.7663		1840.99	33.7663	1840.99	33.7663	1840.99	33.7663	-0.00315583	3.04266
280	140.661	74355	2.06583	0.112732	0.744921	5.09452	1.27488	0.327901	1.03461	0.811533	1828.2	32.2795		1835.19	21.2097	1843.12	26.4227		1843.12	26.4227	1843.12	26.4227	1843.12	26.4227	0.80946	2.25594
221	128.317	56026.5	2.52024	0.112808	0.849987	5.18802	1.37111	0.333694	1.07585	0.784658	1856.26	34.011		1850.65	22.8784	1844.34	30.1457		1844.34	30.1457	1844.34	30.1457	1844.34	30.1457	-0.646606	2.47121
295	149.148	776048	2.41211	0.112995	0.824279	5.08049	1.42256	0.326237	1.15941	0.81502	1820.12	36.0352		1832.85	23.6562	1847.33	29.2232		1847.33	29.2232	1847.33	29.2232	1847.33	29.2232	1.47315	2.49687
218	123.446	109075	2.73156	0.113214	0.944253	5.06831	1.39272	0.324826	1.02374	0.735067	1813.25	31.7144		1830.82	23.1507	1850.84	33.4632		1850.84	33.4632	1850.84	33.4632	1850.84	33.4632	2.03072	2.46447
19	147.709	45168.6	4.49227	0.113257	0.850947	5.07189	1.32018	0.324931	1.00934	0.764547	1813.77	31.276		1831.42	21.9474	1851.52	30.1535		1851.52	30.1535	1851.52	30.1535	1851.52	30.1535	2.03928	2.32349
59	238.196	66610.2	3.4089	0.11327	1.00289	5.30225	1.50003	0.339652	1.11548	0.743642	1885	35.7339		1869.23	25.1173	1851.72	35.5376		1851.72	35.5376	1851.72	35.5376	1851.72	35.5376	-1.79693	2.74604
162	316.653	222051	2.72651	0.113307	0.903089	4.84639	1.37559	0.310349	1.03764	0.754319	1742.42	31.0515		1792.99	22.6948	1852.32	31.9984		1852.32	31.9984	1852.32	31.9984	1852.32	31.9984	5.9328	2.33469
53	205.83	69608.3	0.858567	0.113631	0.833147	5.18081	1.34526	0.330818	1.05621	0.785138	1842.35	33.174		1849.47	22.442	1857.47	29.5015		1857.47	29.5015	1857.47	29.5015	1857.47	29.5015	0.814351	2.38146
75	93.8906	47252.8	4.51244	0.113651	1.11693	5.36348	1.54859	0.342423	1.07266	0.692671	1898.32	34.571		1879.04	25.9776	1857.79	39.5503		1857.79	39.5503	1857.79	39.5503	1857.79	39.5503	-2.18162	2.86268
199	282.061	36181	5.19808	0.113708	0.974095	4.64888	1.24108	0.296652	0.769042	0.619654	1674.68	22.2305		1758.09	20.3277	1858.69	34.4881		1858.69	34.4881	1858.69	34.4881	1858.69	34.4881	9.89986	2.05559
299	204.269	82098	1.6051	0.113785	0.932724	5.30724	1.40327	0.338431	1.04842	0.747127	1879.12	33.4953		1870.03	23.5004	1859.93	33.0183		1859.93	33.0183	1859.93	33.0183	1859.93	33.0183	-1.03197	2.54168
185	136.76	33823.4	1.69972	0.113809	0.866955	5.26272	1.4197	0.335521	1.12425	0.791893	1865.09	35.6868		1862.84	23.7438	1860.31	30.6883		1860.31	30.6883	1860.31	30.6883	1860.31	30.6883	-0.256729	2.53284
92	50.6649	44421.1	1.58696	0.114067	0.87625	5.21461	1.46193	0.331704	1.17022	0.800465	1846.64	36.8287		1855.01	24.4141	1864.39	31.0021		1864.39	31.0021	1864.39	31.0021	1864.39	31.0021	0.95227	2.57192
0	256.354	5.0917e+06	2.17287	0.11424	0.679991	5.25602	1.37912	0.333832	1.19983	0.869995	1856.93	37.9422		1861.75	23.0604	1867.12	24.0532		1867.12	24.0532	1867.12	24.0532	1867.12	24.0532	0.546141	2.40229
291	139.336	52484.2	2.80837	0.114248	0.903383	4.85481	1.57142	0.308326	1.28579	0.818236	1732.46	38.2861		1794.45	25.9336	1867.26	31.9512		1867.26	31.9512	1867.26	31.9512	1867.26	31.9512	7.2189	2.59318
125	159.752	796062	2.86649	0.114381	0.830401	5.22416	1.4303	0.331398	1.16456	0.814205	1845.15	36.625		1856.57	23.893	1869.36	29.3659		1869.36	29.3659	1869.36	29.3659	1869.36	29.3659	1.29478	2.49857
186	183.342	360925	1.53734	0.114444	0.708403	5.2666	1.33499	0.333907	1.13153	0.847596	1857.29	35.7884		1863.47	22.3296	1870.34	25.0485		1870.34	25.0485	1870.34	25.0485	1870.34	25.0485	0.697933	2.33023
141	367.083	144950	1.85754	0.114482	0.775503	5.24344	1.44576	0.332327	1.22017	0.843965	1849.65	38.4548		1859.71	24.1655	1870.95	27.4191		1870.95	27.4191	1870.95	27.4191	1870.95	27.4191	1.13861	2.51468
240	250.95	125091	3.4528	0.114504	0.598554	5.23626	1.08135	0.33181	0.900589	0.832834	1847.15	28.3497		1858.54	18.0702	1871.29	21.1618		1871.29	21.1618	1871.29	21.1618	1871.29	21.1618	1.28986	1.88183
252	616.74	344935	2.35801	0.114536	0.925395	4.95125	1.82565	0.31366	1.57373	0.862013	1758.69	47.477		1811.04	30.2303	1871.8	32.7157		1871.8	32.7157	1871.8	32.7157	1871.8	32.7157	6.04269	3.02165
6	227.68	44712.1	2.65662	0.114708	0.70836	5.29277	1.26095	0.334794	1.04317	0.827294	1861.58	33.0594		1867.7	21.1077	1874.5	25.0344		1874.5	25.0344	1874.5	25.0344	1874.5	25.0344	0.689287	2.20671
82	423.519	404669	2.13653	0.114911	0.715312	4.98949	1.54916	0.315053	1.37412	0.887014	1765.52	41.595		1817.54	25.6845	1877.68	25.2665		1877.68	25.2665	1877.68	25.2665	1877.68	25.2665	5.97332	2.5511
288	159.09	37651.2	2.24215	0.114945	0.748479	5.44564	1.23112	0.343753	0.977457	0.793961	1904.7	31.5936		1892.07	20.7006	1878.23	26.4366		1878.23	26.4366	1878.23	26.4366	1878.23	26.4366	-1.40934	2.20609
106	324.965	244702	3.34517	0.115	0.789066	5.21068	1.5344	0.328764	1.31596	0.85764	1832.39	41.1392		1854.36	25.6215	1879.09	27.8675		1879.09	27.8675	1879.09	27.8675	1879.09	27.8675	2.48522	2.62384
231	250.934	144156	1.75174	0.115281	0.816696	5.31008	1.40746	0.334218	1.14628	0.814431	1858.79	36.2802		1870.49	23.5727	1883.49	28.8283		1883.49	28.8283	1883.49	28.8283	1883.49	28.8283	1.31122	2.44785
94	186.057	342235	3.381	0.115678	0.827612	5.45571	1.22521	0.342206	0.903431	0.737371	1897.27	29.1031		1893.65	20.6071	1889.67	29.1921		1889.67	29.1921	1889.67	29.1921	1889.67	29.1921	-0.402327	2.18579
81	358.768	2.31089e+06	3.00162	0.11588	0.915638	5.45207	1.4092	0.341382	1.0712	0.760144	1893.32	34.4456		1893.08	23.6997	1892.81	32.2854		1892.81	32.2854	1892.81	32.2854	1892.81	32.2854	-0.0268848	2.49453
131	106.577	75823	2.2489	0.116111	0.894204	5.36556	1.45401	0.335296	1.14654	0.788534	1864	36.376		1879.37	24.3924	1896.39	31.5161		1896.39	31.5161	1896.39	31.5161	1896.39	31.5161	1.70801	2.51947
56	154.948	238395	0.919703	0.116156	0.763467	5.42268	1.20083	0.338735	0.926885	0.771869	1880.58	29.6324		1888.45	20.1781	1897.09	26.9053		1897.09	26.9053	1897.09	26.9053	1897.09	26.9053	0.870073	2.10152
96	173.416	162686	1.73522	0.116458	0.644119	5.34532	1.36369	0.333037	1.20198	0.881419	1853.09	37.9424		1876.14	22.8634	1901.75	22.6861		1901.75	22.6861	1901.75	22.6861	1901.75	22.6861	2.55891	2.30904
172	173.298	105281	0.598066	0.116595	0.890836	5.63871	1.46934	0.350904	1.16849	0.79525	1938.91	38.3501		1922.04	24.8386	1903.87	31.3693		1903.87	31.3693	1903.87	31.3693	1903.87	31.3693	-1.84082	2.62167
210	149.861	40584.8	2.02134	0.116665	0.707777	5.46161	1.36871	0.339678	1.1715	0.855917	1885.12	37.5305		1894.58	23.0248	1904.95	24.9229		1904.95	24.9229	1904.95	24.9229	1904.95	24.9229	1.0407	2.3575
52	139.486	62559.4	1.30776	0.116886	0.839541	5.52026	1.55917	0.342677	1.31384	0.842655	1899.54	42.3674		1903.76	26.2723	1908.34	29.5508		1908.34	29.5508	1908.34	29.5508	1908.34	29.5508	0.46134	2.70273
207	261.688	61427.8	2.31061	0.117081	0.686016	5.13861	1.30529	0.318454	1.11048	0.850753	1782.17	33.8897		1842.51	21.7464	1911.34	24.1381		1911.34	24.1381	1911.34	24.1381	1911.34	24.1381	6.75787	2.12849
311	135.766	62452.7	2.51287	0.117156	0.797907	5.51752	1.26275	0.341718	0.978716	0.775066	1894.93	31.4948		1903.33	21.2756	1912.49	28.0714		1912.49	28.0714	1912.49	28.0714	1912.49	28.0714	0.918087	2.19704
206	202.549	221998	1.23826	0.117229	0.80229	5.52316	1.34832	0.341853	1.08366	0.803705	1895.58	34.8819		1904.21	22.7211	1913.61	28.2179		1913.61	28.2179	1913.61	28.2179	1913.61	28.2179	0.942442	2.33588
103	163.787	65365.6	1.6122	0.117383	0.890336	5.46004	1.48646	0.337503	1.19032	0.800775	1874.64	37.9508		1894.33	25.0047	1915.97	31.3065		1915.97	31.3065	1915.97	31.3065	1915.97	31.3065	2.15674	2.54547
209	216.108	676751	2.65806	0.117545	0.78948	5.47703	1.31528	0.338087	1.05199	0.799822	1877.46	33.5839		1897	22.1356	1918.43	27.7514		1918.43	27.7514	1918.43	27.7514	1918.43	27.7514	2.1356	2.25138
62	223.429	459120	5.12094	0.117823	1.01649	5.5082	1.56016	0.339208	1.18357	0.758621	1882.86	37.878		1901.88	26.2802	1922.67	35.7148		1922.67	35.7148	1922.67	35.7148	1922.67	35.7148	2.0707	2.68147
109	177.828	84136.4	1.98246	0.117954	0.901826	5.77053	1.47656	0.35497	1.16916	0.791813	1958.29	38.7		1942	25.0468	1924.66	31.6779		1924.66	31.6779	1924.66	31.6779	1924.66	31.6779	-1.74745	2.61679
61	106.047	772843	2.71583	0.118011	0.90963	5.42124	1.24481	0.333321	0.849782	0.682659	1854.46	26.8417		1888.22	20.9163	1925.53	31.9488		1925.53	31.9488	1925.53	31.9488	1925.53	31.9488	3.69126	2.12055
13	344.605	544073	2.443	0.118331	0.752766	5.66851	1.17921	0.347583	0.907679	0.769734	1923.05	29.5808		1926.58	19.9495	1930.38	26.4233		1930.38	26.4233	1930.38	26.4233	1930.38	26.4233	0.379629	2.05126
83	74.9251	8774.5	1.21638	0.118705	1.26249	5.51368	1.64892	0.337023	1.06068	0.643258	1872.33	33.7817		1902.73	27.7798	1936.03	44.2897		1936.03	44.2897	1936.03	44.2897	1936.03	44.2897	3.28996	2.81768
203	236.194	635089	1.36983	0.118872	0.64875	5.826	1.1098	0.355612	0.900434	0.811348	1961.34	29.8448		1950.29	18.8516	1938.55	22.7535		1938.55	22.7535	1938.55	22.7535	1938.55	22.7535	-1.17572	1.94433
245	159.261	48227.1	0.719274	0.119967	0.765284	6.02312	1.31158	0.36429	1.06516	0.812125	2002.47	35.9362		1979.19	22.3867	1954.94	26.7849		1954.94	26.7849	1954.94	26.7849	1954.94	26.7849	-2.43154	2.31272
76	90.1306	100996	2.65618	0.120301	0.910774	5.73969	1.43462	0.346183	1.10844	0.772633	1916.35	36.0153		1937.36	24.3161	1959.9	31.8595		1959.9	31.8595	1959.9	31.8595	1959.9	31.8595	2.22241	2.42963
120	382.297	140962	4.24842	0.122151	0.684083	5.94397	1.24822	0.353074	1.04407	0.836446	1949.26	34.4229		1967.68	21.2648	1987.1	23.8565		1987.1	23.8565	1987.1	23.8565	1987.1	23.8565	1.90398	2.09474
60	419.814	2.80647e+06	1.84701	0.122214	0.611409	6.04845	1.45826	0.359097	1.3239	0.907861	1977.89	44.197		1982.85	24.9055	1988	21.3198		1988	21.3198	1988	21.3198	1988	21.3198	0.508619	2.46596
258	387.432	473764	1.19186	0.124342	0.919009	6.22299	1.4409	0.363135	1.10978	0.770199	1997.02	37.3543		2007.69	24.7072	2018.67	31.9327		2018.67	31.9327	2018.67	31.9327	2018.67	31.9327	1.07246	2.42344
129	122.915	31323.3	1.5425	0.125946	1.01208	6.35926	1.69031	0.366361	1.35382	0.800934	2012.25	45.865		2026.66	29.0706	2041.35	35.071		2041.35	35.071	2041.35	35.071	2041.35	35.071	1.42535	2.81357
281	299.966	13737	3.14471	0.129034	1.93118	5.76381	2.34732	0.32411	1.33433	0.568447	1809.77	41.2673		1940.99	39.8138	2084.07	66.5999		2084.07	66.5999	2084.07	66.5999	2084.07	66.5999	13.162	3.40907
272	278.368	84494.8	2.54269	0.129478	0.950426	6.80483	1.36044	0.381338	0.973383	0.715494	2082.53	33.9523		2086.35	23.6068	2090.11	32.7522		2090.11	32.7522	2090.11	32.7522	2090.11	32.7522	0.362472	2.25311
173	269.022	6339.61	1.65236	0.140466	3.24122	6.75639	3.44793	0.349006	1.1759	0.341046	1929.85	38.4384		2080.03	59.7903	2232.19	109.983		2232.19	109.983	2232.19	109.983	2232.19	109.983	13.5446	4.59468
80	255.947	76014.7	2.72121	0.146153	0.753963	8.55311	1.32801	0.424625	1.09323	0.823208	2281.44	41.171		2291.58	23.6639	2300.63	25.3888		2300.63	25.3888	2300.63	25.3888	2300.63	25.3888	0.834142	2.09764
216	180.239	126331	4.66818	0.147304	0.863954	8.62387	1.49721	0.42479	1.2228	0.816715	2282.19	46.0631		2299.08	26.7023	2314.1	29.0522		2314.1	29.0522	2314.1	29.0522	2314.1	29.0522	1.37927	2.34418
73	212.649	81088.4	1.55279	0.155403	0.842863	9.28191	1.55363	0.433378	1.30512	0.840047	2320.93	49.8577		2366.23	27.9141	2405.49	28.0795		2405.49	28.0795	2405.49	28.0795	2405.49	28.0795	3.51526	2.35891
263	201.639	116120	0.956191	0.156326	0.882887	8.9859	1.31728	0.417079	0.977623	0.742151	2247.2	36.3556		2336.57	23.5917	2415.55	29.3771		2415.55	29.3771	2415.55	29.3771	2415.55	29.3771	6.96941	1.88289
179	244.354	110460	3.10843	0.160356	0.869976	10.3874	1.26519	0.47001	0.918616	0.726068	2483.6	37.1105		2469.92	22.9691	2458.67	28.8208		2458.67	28.8208	2458.67	28.8208	2458.67	28.8208	-1.01403	1.91841
279	440.466	243558	6.32377	0.160861	0.743615	9.2898	1.62691	0.419029	1.44702	0.88943	2256.07	53.989		2367.01	29.2334	2463.98	24.6206		2463.98	24.6206	2463.98	24.6206	2463.98	24.6206	8.43785	2.37447
284	236.086	120484	2.92887	0.161508	0.80731	10.4161	1.3482	0.46795	1.07977	0.800895	2474.56	43.4904		2472.48	24.4822	2470.76	26.7119		2470.76	26.7119	2470.76	26.7119	2470.76	26.7119	-0.154003	2.06658
32	148.681	267932	2.79892	0.161871	0.695292	10.3825	1.29946	0.465393	1.09781	0.844814	2463.33	44.0522		2469.49	23.5904	2474.55	22.996		2474.55	22.996	2474.55	22.996	2474.55	22.996	0.453674	2.00622
309	102.877	1.12527e+07	1.00324	0.162919	0.80654	10.1791	1.43849	0.453344	1.19111	0.82803	2410.1	46.945		2451.18	26.0688	2485.43	26.6527		2485.43	26.6527	2485.43	26.6527	2485.43	26.6527	3.0309	2.15613
122	175.322	74019.5	2.29619	0.163428	0.720528	10.5137	1.30866	0.466786	1.09244	0.834778	2469.45	43.9262		2481.13	23.7834	2490.69	23.7976		2490.69	23.7976	2490.69	23.7976	2490.69	23.7976	0.852814	2.00194
36	325.966	113470	3.75523	0.165537	0.757261	10.7574	1.16418	0.471522	0.884237	0.759535	2490.23	35.7997		2502.4	21.1992	2512.27	24.9517		2512.27	24.9517	2512.27	24.9517	2512.27	24.9517	0.877033	1.732
3	257	81690.4	41.822	0.165856	0.702116	10.4932	1.3221	0.459052	1.12026	0.847333	2435.37	44.5333		2479.31	24.0236	2515.51	23.1269		2515.51	23.1269	2515.51	23.1269	2515.51	23.1269	3.18576	1.98151
107	165.923	169765	1.0379	0.166628	0.886606	11.2056	1.52323	0.487952	1.23861	0.813148	2561.81	51.3215		2540.38	27.8327	2523.31	29.183		2523.31	29.183	2523.31	29.183	2523.31	29.183	-1.52585	2.3485
303	142.787	62656.8	1.28057	0.168563	0.95713	11.1247	1.4512	0.478867	1.09082	0.751668	2522.33	44.629		2533.63	26.5007	2542.68	31.4442		2542.68	31.4442	2542.68	31.4442	2542.68	31.4442	0.800459	2.14141
123	89.2831	32498.5	1.5622	0.168863	0.662193	11.4153	1.29181	0.490501	1.10918	0.858623	2572.84	46.1197		2557.68	23.6394	2545.67	21.7462		2545.67	21.7462	2545.67	21.7462	2545.67	21.7462	-1.06762	2.0069
115	66.4551	103882	0.590828	0.169674	1.03523	10.8425	1.51233	0.463661	1.10247	0.72899	2455.7	44.127		2509.72	27.5579	2553.69	33.974		2553.69	33.974	2553.69	33.974	2553.69	33.974	3.83705	2.15002
48	121.884	113239	2.22554	0.172978	0.845658	11.6448	1.3627	0.48846	1.06856	0.784148	2564.01	44.3064		2576.28	24.9764	2585.93	27.6638		2585.93	27.6638	2585.93	27.6638	2585.93	27.6638	0.847699	2.01513
70	327.627	67288.8	1.31442	0.176933	0.926749	10.7614	1.70429	0.441316	1.43029	0.839232	2356.53	55.3341		2502.74	31.0366	2623.59	30.2135		2623.59	30.2135	2623.59	30.2135	2623.59	30.2135	10.1793	2.34909
151	149.01	68087.5	2.6553	0.182513	0.928182	13.0077	1.40101	0.517124	1.04943	0.749054	2686.97	45.1965		2680.22	25.8932	2675.11	30.1059		2675.11	30.1059	2675.11	30.1059	2675.11	30.1059	-0.443371	2.0328
46	355.999	153497	1.35376	0.1827	0.782504	12.9868	1.47057	0.515765	1.24509	0.846675	2681.19	53.5301		2678.69	27.1757	2676.8	25.3755		2676.8	25.3755	2676.8	25.3755	2676.8	25.3755	-0.164174	2.21376
140	380.001	105797	1.28933	0.183302	0.821735	12.1529	1.16351	0.48106	0.823716	0.707958	2531.88	33.8049		2616.28	21.3959	2682.24	26.6346		2682.24	26.6346	2682.24	26.6346	2682.24	26.6346	5.6059	1.57067
18	126.199	126468	1.88714	0.183974	0.85397	13.0059	1.53389	0.512945	1.27418	0.830689	2669.19	54.5829		2680.08	28.349	2688.29	27.6641		2688.29	27.6641	2688.29	27.6641	2688.29	27.6641	0.710382	2.27299
171	106.753	40103	2.16695	0.184039	0.812829	12.7912	1.46972	0.504301	1.22449	0.833148	2632.25	51.8667		2664.4	27.1304	2688.88	26.3296		2688.88	26.3296	2688.88	26.3296	2688.88	26.3296	2.10589	2.15399
160	56.6979	22752.9	1.70633	0.184074	0.928599	12.7187	1.70701	0.501347	1.43234	0.839092	2619.58	60.434		2659.04	31.4984	2689.18	30.0799		2689.18	30.0799	2689.18	30.0799	2689.18	30.0799	2.5882	2.49751
90	217.059	124888	2.95958	0.184206	0.747552	11.8113	1.59292	0.465246	1.40661	0.883041	2462.68	56.4318		2589.56	29.2291	2690.37	24.2112		2690.37	24.2112	2690.37	24.2112	2690.37	24.2112	8.46308	2.25351
11	266.64	90606.4	2.47078	0.184625	0.765494	13.4687	1.28436	0.529327	1.03131	0.802976	2738.62	45.1014		2713.09	23.7952	2694.13	24.7838		2694.13	24.7838	2694.13	24.7838	2694.13	24.7838	-1.65129	1.91753
130	307.503	78549.3	3.41726	0.185397	0.643922	12.0959	1.33362	0.473396	1.16786	0.87571	2498.44	47.4104		2611.87	24.5156	2701.02	20.8398		2701.02	20.8398	2701.02	20.8398	2701.02	20.8398	7.50012	1.89482
14	166.624	71817.2	0.80922	0.185873	0.645343	13.1043	1.16089	0.511548	0.964987	0.831247	2663.23	41.2631		2687.19	21.4663	2705.25	20.8774		2705.25	20.8774	2705.25	20.8774	2705.25	20.8774	1.5531	1.70404
45	376.76	356218	2.50202	0.186224	0.761898	13.3994	1.2645	0.52208	1.00919	0.798095	2707.99	43.7368		2708.21	23.4188	2708.36	24.6409		2708.36	24.6409	2708.36	24.6409	2708.36	24.6409	0.0136331	1.85347
55	119.423	845342	2.10365	0.187061	0.772774	13.7331	1.64313	0.532689	1.45007	0.882503	2752.77	63.6775		2731.48	30.4836	2715.76	24.9752		2715.76	24.9752	2715.76	24.9752	2715.76	24.9752	-1.36283	2.52324
314	166.016	197815	1.58502	0.187405	0.706255	13.4845	1.33795	0.522088	1.13637	0.849331	2708.03	49.2491		2714.2	24.7903	2718.79	22.8187		2718.79	22.8187	2718.79	22.8187	2718.79	22.8187	0.395735	1.99503
298	87.951	7310.96	1.18734	0.19079	0.993487	12.9605	1.6323	0.492894	1.29513	0.793443	2583.19	54.0277		2676.78	30.1605	2748.25	32.0061		2748.25	32.0061	2748.25	32.0061	2748.25	32.0061	6.00624	2.25011
251	205.751	267728	3.67186	0.201037	0.792176	14.1506	1.41775	0.510725	1.17578	0.829331	2659.72	50.2232		2759.85	26.3545	2833.91	25.3205		2833.91	25.3205	2833.91	25.3205	2833.91	25.3205	6.14639	1.96061
205	307.356	1.93773e+06	1.52737	0.202662	0.921749	15.06	1.45901	0.539188	1.13097	0.775162	2780.05	50.0583		2819.04	27.2302	2847.04	29.4292		2847.04	29.4292	2847.04	29.4292	2847.04	29.4292	2.35286	2.02738
260	63.4167	1.17502e+06	0.926011	0.204001	0.735889	16.0322	1.22947	0.570228	0.984913	0.80109	2908.76	45.1918		2878.72	23.0327	2857.75	23.4779		2857.75	23.4779	2857.75	23.4779	2857.75	23.4779	-1.78468	1.78885
Rejected Analyses (>10% discordant; >5% reverse discordant; >10% 2σ uncertainty)
264	303.069	67863.4	2.97996	0.113972	0.834907	4.45465	1.28051	0.283598	0.970892	0.758208	1609.46	27.1031		1722.57	20.8128	1862.89	29.5445		1862.89	29.5445	1862.89	29.5445	1862.89	29.5445	13.6044	1.99854	x		x
25	227.936	56539.6	1.33558	0.147507	0.802834	7.34618	1.68578	0.361358	1.48233	0.879316	1988.61	49.715		2154.44	29.532	2316.46	26.9898		2316.46	26.9898	2316.46	26.9898	2316.46	26.9898	14.1531	2.3678	x		x
148	264.238	157349	0.932394	0.0961955	0.677053	3.0291	1.67693	0.228479	1.53417	0.914871	1326.52	36.0519		1414.98	25.0916	1550.76	24.9232		1550.76	24.9232	1550.76	24.9232	1326.52	36.0519	14.4598	2.70086	x		x
265	350.941	375915	3.94669	0.167828	0.865751	9.23111	1.40741	0.399096	1.10962	0.788418	2164.87	39.9927		2361.21	25.2732	2535.36	28.4678		2535.36	28.4678	2535.36	28.4678	2535.36	28.4678	14.6126	1.84592	x		x
27	433.654	260488	1.32056	0.100063	0.926398	3.30348	1.471	0.239544	1.14264	0.776779	1384.33	27.9002		1481.87	22.4734	1624.43	33.7733		1624.43	33.7733	1624.43	33.7733	1384.33	27.9002	14.781	2.46762	x		x
110	710.152	133501	1.8275	0.0953488	0.694571	2.91561	1.90974	0.221872	1.77895	0.931516	1291.76	40.8146		1385.97	28.3021	1534.14	25.6212		1534.14	25.6212	1534.14	25.6212	1291.76	40.8146	15.7991	3.00921	x		x
307	491.002	375090	6.50868	0.166435	0.956563	8.93747	1.36323	0.389635	0.971278	0.712483	2121.14	34.4093		2331.64	24.4014	2521.36	31.4921		2521.36	31.4921	2521.36	31.4921	2521.36	31.4921	15.8735	1.72236	x		x
236	409.344	63844.4	1.39678	0.193698	0.984094	11.4796	1.61334	0.430019	1.27845	0.792423	2305.8	48.5743		2562.92	29.5373	2773.1	31.6304		2773.1	31.6304	2773.1	31.6304	2773.1	31.6304	16.8509	1.9919	x		x
44	53.6076	6406.2	1.7302	0.0996429	1.1438	3.18242	1.62286	0.231739	1.15126	0.709401	1343.61	27.367		1452.9	24.5764	1616.6	41.7424		1616.6	41.7424	1616.6	41.7424	1343.61	27.367	16.8869	2.7334	x		x
152	212.054	156567	1.3486	0.092399	0.955363	2.64711	2.8759	0.20787	2.71258	0.94321	1217.46	58.9836		1313.84	41.5476	1474.76	35.5255		1474.76	35.5255	1474.76	35.5255	1217.46	58.9836	17.4465	4.46667	x		x
87	62.4864	13139.4	2.13483	0.116731	1.01621	4.44606	1.98857	0.27636	1.7093	0.859565	1573.01	46.7625		1720.96	32.3116	1905.97	35.7761		1905.97	35.7761	1905.97	35.7761	1905.97	35.7761	17.4694	2.90163	x		x
40	374.753	8528.44	1.71861	0.1295	1.0829	5.39915	1.47715	0.302512	1.00465	0.680124	1703.75	29.4815		1884.72	24.8049	2090.41	37.3167		2090.41	37.3167	2090.41	37.3167	2090.41	37.3167	18.4969	2.02629	x		x
275	510.55	12853.9	1.4077	0.10455	1.40808	3.4294	2.22306	0.238002	1.72026	0.773827	1376.3	41.7859		1511.16	34.2572	1705.6	50.8079		1705.6	50.8079	1705.6	50.8079	1376.3	41.7859	19.3067	3.43223	x		x
111	412.712	66105.3	1.32263	0.0988608	0.730013	2.94637	2.04783	0.216248	1.91329	0.934303	1262.02	42.982		1393.91	30.4301	1601.91	26.6938		1601.91	26.6938	1601.91	26.6938	1262.02	42.982	21.2182	2.98711	x		x
226	576.45	67382.2	1.46344	0.107699	0.921361	3.54105	2.20498	0.238566	2.00325	0.908514	1379.24	48.7531		1536.43	34.2223	1760.03	33.0212		1760.03	33.0212	1760.03	33.0212	1379.24	48.7531	21.6354	3.13602	x		x
85	197.532	9900.22	1.82659	0.0801384	1.38943	1.71819	1.90666	0.155567	1.30569	0.684807	932.094	22.2095		1015.35	23.9867	1199.54	53.6904		1199.54	53.6904	932.094	22.2095	932.094	22.2095	22.2958	3.94009	x		x
300	467.681	94546.4	2.1117	0.104751	0.776193	3.29926	2.67197	0.228533	2.55675	0.956877	1326.8	60.0934		1480.88	40.8133	1709.12	27.9926		1709.12	27.9926	1709.12	27.9926	1326.8	60.0934	22.3694	3.73886	x		x
1	345.232	14520.5	1.18843	0.193612	0.785389	10.0277	1.47232	0.375799	1.24535	0.84584	2056.63	42.9801		2437.33	26.6459	2772.37	25.2436		2772.37	25.2436	2772.37	25.2436	2772.37	25.2436	25.8168	1.69107	x		x
99	326.069	66124.8	1.48439	0.0943615	1.01098	2.4353	1.74604	0.18726	1.42358	0.81532	1106.52	28.3699		1253.09	24.6349	1514.52	37.3916		1514.52	37.3916	1106.52	28.3699	1106.52	28.3699	26.9396	2.60046	x		x
211	304.463	117023	1.53293	0.154494	0.802217	6.63387	1.62666	0.31156	1.41508	0.869934	1748.38	42.4729		2063.86	28.1341	2395.52	26.7476		2395.52	26.7476	2395.52	26.7476	2395.52	26.7476	27.0147	1.95133	x		x
93	805.469	67736.9	1.81285	0.0885684	0.734979	2.07402	1.71794	0.169911	1.55278	0.903862	1011.62	28.4941		1140.26	23.0686	1393.99	27.6305		1393.99	27.6305	1011.62	28.4941	1011.62	28.4941	27.4299	2.49945	x		x
276	687.331	64840.3	1.06304	0.100387	0.724935	2.77532	1.51359	0.200597	1.32869	0.877841	1178.53	28.0496		1348.92	22.1447	1630.43	26.4074		1630.43	26.4074	1178.53	28.0496	1178.53	28.0496	27.7167	2.08095	x		x
159	620.718	69367.4	1.8812	0.160455	0.806366	6.98708	1.96135	0.315959	1.78792	0.911578	1769.97	54.2394		2109.79	34.1501	2459.71	26.7102		2459.71	26.7102	2459.71	26.7102	2459.71	26.7102	28.0417	2.33947	x		x
121	301.89	61702.1	3.23602	0.17875	0.78667	8.43759	2.09529	0.342499	1.94201	0.926844	1898.68	62.6001		2279.23	37.2854	2640.58	25.5989		2640.58	25.5989	2640.58	25.5989	2640.58	25.5989	28.0959	2.47106	x		x
180	623.702	46716	3.04019	0.089849	0.896277	2.10766	2.68687	0.170206	2.53297	0.942723	1013.24	46.5499		1151.31	36.2699	1421.47	33.5687		1421.47	33.5687	1013.24	46.5499	1013.24	46.5499	28.7187	3.68208	x		x
9	472.68	106206	1.55142	0.0770022	0.914166	1.38289	2.86976	0.130308	2.72027	0.947906	789.625	39.6244		881.672	33.1479	1120.36	35.7429		789.625	39.6244	789.625	39.6244	789.625	39.6244	29.5205	4.19099	x		x
239	596.31	50306.2	1.45856	0.175633	0.883351	7.58446	2.133	0.313332	1.94149	0.910216	1757.08	58.5253		2183.03	37.5095	2611.32	28.833		2611.32	28.833	2611.32	28.833	2611.32	28.833	32.7129	2.36115	x		x
69	1023.41	48215.8	2.71362	0.0945647	0.830438	2.19759	1.97246	0.168619	1.78913	0.907053	1004.5	32.6175		1180.28	26.9802	1518.58	30.6969		1518.58	30.6969	1004.5	32.6175	1004.5	32.6175	33.8529	2.53008	x		x
118	656.305	10200.6	1.30843	0.0874434	2.4009	1.80291	2.91574	0.149601	1.65446	0.567424	898.726	27.2031		1046.51	37.3293	1369.43	90.5798		898.726	27.2031	898.726	27.2031	898.726	27.2031	34.3722	4.77382	x		x
190	277.841	22455	1.21849	0.101816	1.3234	2.53806	4.01857	0.180873	3.7944	0.944218	1071.74	73.4334		1283.01	57.3871	1656.66	48.05		1656.66	48.05	1071.74	73.4334	1071.74	73.4334	35.307	4.8134	x		x
20	612.749	70012.6	5.02791	0.154689	0.612101	5.54225	1.89043	0.259965	1.7886	0.946129	1489.66	46.6278		1907.18	31.8745	2397.66	20.4081		2397.66	20.4081	2397.66	20.4081	1489.66	46.6278	37.8701	2.01534	x		x
95	54.1124	11953.7	1.97909	0.124605	1.04902	3.66294	2.00688	0.213296	1.71089	0.85251	1246.35	38.0026		1563.33	31.3772	2022.41	36.4306		2022.41	36.4306	2022.41	36.4306	1246.35	38.0026	38.3729	2.18249	x		x
134	801.363	66782.2	2.50138	0.107319	0.813027	2.69434	6.82315	0.182165	6.77454	0.992875	1078.79	131.904	x	1326.91	99.1164	1753.57	29.1584		1753.57	29.1584	1078.79	131.904	1078.79	131.904	38.4802	7.59125	x		x
167	445.425	12509.9	1.00284	0.0983459	1.15233	2.03098	2.53065	0.149844	2.25307	0.890313	900.086	37.0979		1125.95	33.7507	1592.17	42.1875		1592.17	42.1875	900.086	37.0979	900.086	37.0979	43.4678	2.76999	x		x
215	947.951	6977.52	2.17133	0.113668	0.683604	2.27216	2.04826	0.14504	1.93082	0.942662	873.101	30.9019		1203.69	28.3078	1858.07	24.2037		873.101	30.9019	873.101	30.9019	873.101	30.9019	53.0102	1.77218	x		x
F921-6, Last Chance Creek Fm, Coal Creek inlier (Ediacaran), Boise State University, n=151/194
479	140.608	804.54	0.443245	0.0718881	1.80513	1.57103	2.27492	0.158499	1.38449	0.589639	948.431	23.9328		958.834	27.665	982.768	72.0414		982.768	72.0414	948.431	23.9328	948.431	23.9328	3.49389	7.48176					948.431	25.8767	982.768	73.3489	958.834	28.8253		80.8638	77.5624	529.7	2.22285	0.130778	99.226	0.398176	8.85138	14.4766	4.32848	45.0709	10.3372
332	279.872	1583.08	4.28902	0.0689965	4.99419	1.50812	6.11529	0.158529	3.52914	0.571631	948.595	61.0161		933.679	73.1797	898.635	201.925		898.635	201.925	948.595	61.0161	948.595	61.0161	-5.55962	24.6722					948.595	62.0808	898.635	202.879	933.679	73.8523		560.282	5.31138	1679.09	0.50867		1.48987	0.073574	2.62478	8.18838	0.425016	70.9263	25.3677
375	61.1934	6794.42	2.33213	0.073773	3.61956	1.66896	3.96615	0.164076	1.62146	0.390628	979.39	28.8765		996.789	49.3581	1035.29	143.304		1035.29	143.304	979.39	28.8765	979.39	28.8765	5.39904	13.3884					979.39	31.2505	1035.29	144.578	996.789	50.3646		190.666	13.7077	1162.88	4.85038	1.01262	8.11626	0.541961	6.44604	11.0418	0.949043	40.1397	12.4773
377	75.367	2221.48	0.897361	0.0724766	3.41324	1.64348	3.67567	0.164462	1.36394	0.347768	981.524	24.3394		987.049	45.479	999.339	135.877		999.339	135.877	981.524	24.3394	981.524	24.3394	1.78275	13.5745					981.524	27.118	999.339	137.233	987.049	46.5622		322.303	18.019	1721.92	5.55183	0.308729	71.3421	0.47578	10.4074	18.5691	2.75495	65.5258	20.5568
499	131.852	1685.86	1.25087	0.0764475	2.5272	1.75834	2.86883	0.166816	1.35773	0.457946	994.546	24.5259		1030.24	36.3954	1106.79	98.9922		1106.79	98.9922	994.546	24.5259	994.546	24.5259	10.1415	8.33691					994.546	26.5982	1106.79	99.9131	1030.24	37.3668		262.015	22.4842	1442.32	6.15043		26.1867	0.655032	13.5906	21.1671	1.98926	85.8603	26.5263
476	50.3412	467.395	0.934235	0.0765139	3.20532	1.80995	3.48237	0.171563	1.36117	0.378289	1020.72	25.1852		1049.06	44.6404	1108.55	125.52		1108.55	125.52	1020.72	25.1852	1020.72	25.1852	7.92347	10.6704					1020.72	27.2975	1108.55	126.247	1049.06	45.3534		161.929	11.7551	958.274	1.98069		12.7974		1.79982	6.28753	0.816558	37.1893	12.7425
372	152.018	1134.99	1.54521	0.0767434	1.76902	1.82139	2.14622	0.172132	1.21524	0.521295	1023.85	22.5487		1053.19	27.574	1114.53	69.2136		1114.53	69.2136	1023.85	22.5487	1023.85	22.5487	8.13652	6.05295					1023.85	25.7536	1114.53	71.7585	1053.19	29.5481		408.516	26.5828	1567.79	8.55381	0.33139	38.9164	0.270037	4.24838	7.69176	1.95571	33.5139	12.6416
515	81.3681	488.129	1.60133	0.0802013	2.41838	1.9183	2.70123	0.173474	1.20338	0.427161	1031.22	22.4769		1087.48	35.3374	1201.96	93.4152		1201.96	93.4152	1031.22	22.4769	1031.22	22.4769	14.2051	6.92514					1031.22	24.8579	1201.96	94.3621	1087.48	36.3583		151.997	52.8118	489.783	4.9426	1.16801	8.82617	0.181658	1.56999	2.74829	0.15362	21.3971	8.16412
453	95.4809	279.399	0.597025	0.0706055	2.22974	1.71743	2.69878	0.176417	1.52041	0.548879	1047.37	28.808		1015.07	33.9448	946.005	89.4923		946.005	89.4923	1047.37	28.808	1047.37	28.808	-10.715	10.9074					1047.37	30.7473	946.005	90.5562	1015.07	34.9438		175.495	24.8887	675.876	2.74932		54.2505	0.325451	7.36584	10.6662	2.41756	35.1263	10.7691
357	50.9697	945.562	0.936238	0.0780481	2.32801	1.9169	3.07627	0.17813	2.01093	0.634583	1056.75	38.4161		1086.99	40.2336	1148.1	90.6339		1148.1	90.6339	1056.75	38.4161	1056.75	38.4161	7.95717	7.99948					1056.75	40.5052	1148.1	92.5894	1086.99	41.6783		410.096	27.4791	1917.27	2.78561	5.03669	15.7524	2.11261	17.9098	18.3063	0.944843	72.7159	20.5275
502	64.1339	730.856	0.686672	0.0751277	2.9407	1.86894	3.31668	0.180424	1.53383	0.450731	1069.29	29.6216		1070.15	42.9994	1071.92	115.788		1071.92	115.788	1069.29	29.6216	1069.29	29.6216	0.245831	11.124					1069.29	31.6071	1071.92	116.584	1070.15	43.8075		156.871	42.4665	682.66	1.10506		29.8931	0.741797	8.23875	13.6205	2.75709	47.0837	13.5864
437	184.864	2787.76	1.61415	0.0753433	1.4974	1.88158	1.75	0.181124	0.905711	0.480217	1073.11	17.5487		1074.62	22.7413	1077.66	58.9089		1077.66	58.9089	1073.11	17.5487	1073.11	17.5487	0.421674	5.6817					1073.11	20.6874	1077.66	60.4435	1074.62	24.327		577.611	15.1515	1597.96	2.07132		2.82266	0.0386564	2.87467	9.69462	0.115582	57.4023	21.6227
371	84.2666	2460.25	2.93651	0.0818232	5.95711	2.0471	6.45495	0.181452	2.4858	0.377792	1074.9	48.2377		1131.33	86.304	1241.29	228.808		1241.29	228.808	1074.9	48.2377	1074.9	48.2377	13.4047	16.4284					1074.9	49.9806	1241.29	229.563	1131.33	86.9498		167.127	10.7076	636.085	1.65289		4.4735	0.0589316	0.564426	2.80708	0.135399	14.9427	4.90291
37	50.9759	393.107	1.83083	0.0746236	3.62747	1.8842	3.80551	0.183126	1.15039	0.283821	1084.03	22.4976		1075.54	49.4766	1058.38	143.119		1058.38	143.119	1084.03	22.4976	1084.03	22.4976	-2.42307	14.0123					1084.03	26.4195	1058.38	143.996	1075.54	50.4755		252.229	15.4195	882.134	0.986305	0.0922986	4.24063	0.129731	4.70198	7.80703	0.784505	31.9039	9.72506
421	220.625	24317	1.60393	0.0749846	1.76956	1.90023	2.00328	0.183795	0.939043	0.437482	1087.67	18.4211		1081.17	26.1217	1068.09	69.7148		1068.09	69.7148	1087.67	18.4211	1087.67	18.4211	-1.83311	6.86679					1087.67	21.4784	1068.09	71.0123	1081.17	27.5472		321.555	13.9967	913.861	2.15898		8.93028	0.0366595	1.29304	5.27561	0.645213	34.9023	12.2621
330	208.898	2235.49	1.52978	0.0760817	1.72253	1.94847	1.93475	0.185743	0.880983	0.40538	1098.27	17.4367		1097.92	25.4453	1097.2	67.5687		1097.2	67.5687	1098.27	17.4367	1098.27	17.4367	-0.0975864	6.36583					1098.27	20.006	1097.2	69.4812	1097.92	26.8265		313.163	9.93974	1709.51	3.4882		10.4536	0.260265	4.44136	8.95713	0.468038	45.5373	15.6867
422	206.876	17315.2	1.72399	0.0742955	1.83777	1.90318	2.28984	0.185787	1.366	0.577734	1098.51	27.0416		1082.2	29.8742	1049.52	72.6043		1049.52	72.6043	1098.51	27.0416	1098.51	27.0416	-4.6684	7.6856					1098.51	29.2207	1049.52	73.8585	1082.2	31.0841		261.202	14.9094	734.978	1.98494	16.8127	43.9569	5.05373	29.6945	14.2785	0.298279	42.2648	13.0684
331	205.218	1363.94	4.06277	0.0786995	1.33595	2.02023	1.65455	0.186178	0.976102	0.516892	1100.64	19.3574		1122.34	22.0255	1164.59	51.8858		1164.59	51.8858	1100.64	19.3574	1100.64	19.3574	5.49143	4.52684					1100.64	23.4368	1164.59	55.2096	1122.34	24.6087		275.485	9.07264	734.251	3.01306		4.91609		0.821129	1.57759		10.3669	5.62896
414	16.2433	85.1738	0.864626	0.0816888	4.5255	2.09762	4.72039	0.186236	1.34236	0.266929	1100.95	26.6279		1148.03	63.6155	1238.06	173.902		1238.06	173.902	1100.95	26.6279	1100.95	26.6279	11.0746	12.6746					1100.95	29.7036	1238.06	174.838	1148.03	64.4502		249.41	65.0304	750.452	1.66261		18.2324	0.0526132	2.88253	4.74627	1.94621	24.4864	7.33254
382	111.441	706.186	0.906205	0.0799095	1.67986	2.05622	2.07646	0.186625	1.22055	0.541943	1103.06	24.2542		1134.36	27.8031	1194.76	64.9564		1194.76	64.9564	1103.06	24.2542	1103.06	24.2542	7.67485	5.41447					1103.06	27.6685	1194.76	67.579	1134.36	29.9196		1232.41	23.8664	3500.15	1.82123	3.78305	34.8074	1.81475	19.5895	24.7978	5.92872	109.626	34.7103
420	225.157	3302.59	2.02802	0.072797	1.50508	1.87656	1.85283	0.186959	1.08062	0.528614	1104.88	21.5059		1072.85	24.0553	1008.31	59.833		1008.31	59.833	1104.88	21.5059	1104.88	21.5059	-9.57803	6.84325					1104.88	25.2311	1008.31	62.6545	1072.85	26.2609		1151.91	23.3239	3435.02	0.735506	0.118821	11.1831	0.937877	12.994	24.0644	2.62427	116.253	36.3936
408	27.4702	293.888	1.4804	0.0771657	3.88114	1.99967	4.54227	0.187946	2.35987	0.5091	1110.24	47.1737		1115.4	60.2621	1125.47	151.606		1125.47	151.606	1110.24	47.1737	1110.24	47.1737	1.35289	13.9336					1110.24	49.0432	1125.47	152.728	1115.4	61.2019		346.198	37.3895	1668.9	0.608573	0.118339	2.21479	0.436045	6.9472	14.6685	4.53403	67.4626	18.7472
388	217.515	1586.38	3.83534	0.0807127	2.69254	2.09744	3.13919	0.188471	1.61392	0.491315	1113.09	32.338		1147.97	42.3048	1214.46	103.819		1214.46	103.819	1113.09	32.338	1113.09	32.338	8.34681	8.27513					1113.09	35.0143	1214.46	105.46	1147.97	43.7453		290.921	4.79247	1439.48	2.3087	0.069478	5.00385	0.152027	1.21004	4.69338	0.388662	32.8686	11.9735
441	228.938	7044.26	3.45155	0.0777593	2.21461	2.02922	3.11619	0.189267	2.19229	0.69484	1117.4	44.0826		1125.35	41.544	1140.71	86.3143		1140.71	86.3143	1117.4	44.0826	1117.4	44.0826	2.04304	8.35907					1117.4	45.4542	1140.71	87.3511	1125.35	42.379		79.9425	10.6222	517.316	24.0832		10.9067	0.0732114	0.30949	3.24731	0.171299	17.0701	5.97742
397	23.6476	411.09	1.19766	0.0866378	6.31468	2.28159	6.70158	0.190998	2.24409	0.327278	1126.78	45.4707		1206.61	92.7291	1352.44	238.767		1352.44	238.767	1126.78	45.4707	1126.78	45.4707	16.6858	15.088					1126.78	47.47	1352.44	239.448	1206.61	93.3101		222.055	21.7456	759.732	2.58398		3.7822	0.117452	1.73608	4.9259	0.848112	20.9926	7.43881
409	74.1219	282.859	1.57069	0.073284	3.09491	1.94751	3.33343	0.192739	1.23828	0.344415	1136.2	25.2823		1097.59	43.8331	1021.82	122.783		1021.82	122.783	1136.2	25.2823	1136.2	25.2823	-11.1931	13.5882					1136.2	28.6985	1021.82	124.206	1097.59	45.0868		266.906	15.387	1596.76	2.25656		8.13253	0.125362	3.6897	7.8822	1.28241	40.9838	13.8289
462	19.0298	187.855	0.843637	0.0894177	5.45881	2.39194	5.67786	0.194011	1.56188	0.268367	1143.06	32.0657		1240.19	79.6842	1413.12	204.683		1413.12	204.683	1143.06	32.0657	1143.06	32.0657	19.1105	11.9341					1143.06	34.1396	1413.12	205.091	1240.19	79.9928		160.52	33.3602	715.159	4.09699	6.74083	28.7812	2.0281	13.3383	13.2305	3.43936	51.5656	16.5497
487	74.0945	733.218	0.633086	0.0750293	1.91389	2.01976	2.3708	0.19524	1.39919	0.572178	1149.7	28.8777		1122.18	31.558	1069.3	75.3871		1069.3	75.3871	1149.7	28.8777	1149.7	28.8777	-7.51855	8.04692					1149.7	31.1832	1069.3	76.6059	1122.18	32.7791		183.737	33.0874	968.68	1.12957	0.0964161	21.2558	0.568865	13.6216	16.1005	5.1649	64.3127	17.9148
323	195.273	2121.41	1.55353	0.0757725	1.57092	2.0428	1.93013	0.19553	1.12144	0.541269	1151.26	23.1741		1129.9	25.7885	1089.08	61.6952		1089.08	61.6952	1151.26	23.1741	1151.26	23.1741	-5.71016	6.35521					1151.26	25.3487	1089.08	63.8098	1129.9	27.2017		235.956	15.3483	926.608	3.41127		35.0005	0.0433427	1.22625	3.06815	0.639536	16.2343	6.34533
353	74.0301	381.059	0.950388	0.0741059	3.53077	1.99992	4.04089	0.19573	1.96531	0.471464	1152.34	40.6472		1115.48	53.6125	1044.38	139.596		1044.38	139.596	1152.34	40.6472	1152.34	40.6472	-10.3378	15.2532					1152.34	42.9553	1044.38	140.915	1115.48	54.7014		224.811	21.9102	802.929	2.10064		31.7738	0.160038	3.00996	5.9112	1.80496	21.6594	7.30813
399	81.8057	584.207	1.71077	0.0767643	3.37732	2.08608	3.63999	0.197092	1.35766	0.349972	1159.68	28.2427		1144.24	48.9677	1115.07	132.128		1115.07	132.128	1159.68	28.2427	1159.68	28.2427	-4.00069	12.581					1159.68	31.4759	1115.07	133.439	1144.24	50.1589		209.881	12.4668	793.61	1.33429		7.77285		0.591849	1.61842	0.215061	16.7118	5.61437
410	141.51	659.05	4.28304	0.0747349	2.31574	2.04191	2.72119	0.198158	1.42905	0.496484	1165.42	29.8621		1129.6	36.3526	1061.38	91.325		1061.38	91.325	1165.42	29.8621	1165.42	29.8621	-9.80223	9.85781					1165.42	32.9426	1061.38	93.2045	1129.6	37.9479		202.782	8.32317	849.946	2.54787		7.71156		0.58346	2.23602	0.327772	15.2457	6.46531
493	41.3885	313.794	1.19551	0.0801867	2.69145	2.19134	3.03348	0.198201	1.39933	0.447231	1165.65	29.2463		1178.29	41.4538	1201.6	103.969		1201.6	103.969	1165.65	29.2463	1165.65	29.2463	2.99192	8.73943					1165.65	31.5857	1201.6	104.822	1178.29	42.3946		146.162	26.7726	391.811	1.84449		7.19112	0.0410345	0.873709	3.08472	0.456317	14.4254	5.16133
494	60.3062	642.126	1.10723	0.0784396	3.21606	2.14452	3.41332	0.198287	1.14355	0.319731	1166.11	23.9091		1163.29	46.3275	1158.03	125.026		1158.03	125.026	1166.11	23.9091	1166.11	23.9091	-0.697581	11.066					1166.11	26.7064	1158.03	125.745	1163.29	47.1292		196.767	16.7439	947.58	2.70627		5.08322	0.305288	5.87204	10.0789	0.426994	48.3596	15.767
513	115.011	4434.86	0.820468	0.084394	2.25947	2.30742	3.06392	0.198296	2.06941	0.666011	1166.16	43.2683		1214.57	42.5404	1301.63	86.0444		1301.63	86.0444	1166.16	43.2683	1166.16	43.2683	10.4078	6.79162					1166.16	44.8727	1301.63	87.0431	1214.57	43.5297		173.234	13.1493	450.803	2.27115		23.7198	0.111669	1.27488	3.13516	1.04019	21.0421	6.48343
456	18.1042	839.759	0.728275	0.0722692	4.05031	2.00143	4.42462	0.200857	1.78107	0.394987	1179.92	37.64		1116	58.7184	993.531	161.379		993.531	161.379	1179.92	37.64	1179.92	37.64	-18.7604	19.6588					1179.92	39.5408	993.531	161.963	1116	59.2375		195.041	7.7559	627.644	1.22727		16.1192		1.60495	2.88474	1.02795	23.2879	7.65995
418	67.412	13333.9	1.01924	0.0770006	2.99172	2.13454	3.30575	0.201052	1.40628	0.401795	1180.97	29.7435		1160.06	44.8009	1121.21	116.936		1121.21	116.936	1180.97	29.7435	1180.97	29.7435	-5.32998	11.3011					1180.97	32.8842	1121.21	118.361	1160.06	46.1024		197.49	17.6872	802.679	2.48394	0.194702	6.3628	0.0757612	2.45399	4.51079	0.400618	22.3035	7.8721
327	277.996	2722.53	1.22302	0.0861295	1.3866	2.38997	1.53711	0.201251	0.663363	0.34767	1182.04	14.042		1239.6	21.5669	1341.1	52.5117		1341.1	52.5117	1182.04	14.042	1182.04	14.042	11.8603	3.60652					1182.04	17.5614	1341.1	54.7983	1239.6	23.4192		393.969	24.9352	1488.51	1.24736		27.6372	0.503294	8.32067	12.4906	4.25124	35.3752	12.9842
338	38.6304	1252.38	0.922139	0.0748996	6.59081	2.08467	7.17521	0.201863	2.83634	0.389488	1185.32	60.1914		1143.77	96.5048	1065.8	259.747		1065.8	259.747	1185.32	60.1914	1185.32	60.1914	-11.2139	27.6861					1185.32	61.8752	1065.8	260.453	1143.77	97.0471		127.327	22.0965	594.482	0.293394		11.9512	0.0915333	1.80697	3.52931	1.78238	15.1499	5.22799
415	105.357	1361.03	2.19054	0.0768109	1.76887	2.15443	2.18754	0.203427	1.28702	0.549145	1193.7	27.4884		1166.48	29.734	1116.29	69.1893		1116.29	69.1893	1193.7	27.4884	1193.7	27.4884	-6.93475	7.07061					1193.7	30.9292	1116.29	71.588	1166.48	31.7225		179.399	44.1678	620.138	3.46239		7.00376		0.288932	1.66687	0.0446297	11.5071	4.44004
473	51.0148	230.902	0.921153	0.0863801	2.65786	2.42702	2.92	0.203779	1.20921	0.397219	1195.59	25.8635		1250.64	41.1553	1346.7	100.578		1346.7	100.578	1195.59	25.8635	1195.59	25.8635	11.2207	6.90299					1195.59	28.5802	1346.7	101.423	1250.64	42.1607		159.238	10.1304	591.101	3.41381	1.0044	14.2243	0.39053	2.71622	5.46719	0.232329	25.4381	8.5644
463	98.7545	1138.33	1.40681	0.080143	1.90898	2.25359	2.38929	0.203943	1.43683	0.584014	1196.47	30.7527		1197.91	32.9356	1200.52	73.754		1200.52	73.754	1196.47	30.7527	1196.47	30.7527	0.33798	6.63699					1196.47	33.0707	1200.52	74.9499	1197.91	34.1887		234.925	26.7709	1032.89	2.40034	0.0547557	6.03858	0.0748866	1.74001	6.52143	0.569952	37.1165	15.1148
446	27.0369	858.644	0.892804	0.0823819	3.70155	2.37385	4.02438	0.208988	1.57928	0.383091	1223.42	34.4931		1234.76	56.3524	1254.63	141.902		1254.63	141.902	1254.63	141.902	1223.42	34.4931	2.48708	11.3665					1223.42	36.6622	1254.63	142.516	1234.76	57.0099		238.377	0.0450216	1186	10.1276	2.33343	18.472	1.95892	17.4782	14.9084	2.2945	70.4547	22.2311
431	101.066	4983.69	1.12002	0.0832453	1.62075	2.40328	2.26434	0.209384	1.58127	0.681841	1225.53	34.5908		1243.58	31.8226	1274.97	61.9537		1274.97	61.9537	1274.97	61.9537	1225.53	34.5908	3.87717	5.40162					1225.53	36.7156	1274.97	63.3314	1243.58	33.1505		1009.06	64.7549	860.727	1.39849	7.56489	29.5793	2.31785	15.4424	9.02654	1.77714	33.4208	12.7541
429	87.7665	1872.21	1.66209	0.0787135	1.80528	2.28429	2.22438	0.210475	1.29956	0.563827	1231.35	28.5506		1207.44	30.7897	1164.92	70.1108		1164.92	70.1108	1164.92	70.1108	1231.35	28.5506	-5.70211	6.81744					1231.35	31.1026	1164.92	71.3686	1207.44	32.1103		193.631	4.56872	820.416	6.02544		16.0905	0.0910192	2.87599	4.754	0.919371	33.3594	12.3044
489	43.7476	325.562	1.12912	0.0902103	2.46243	2.6601	2.68213	0.213865	1.06313	0.375439	1249.38	23.6663		1317.45	38.7946	1429.98	92.1188		1429.98	92.1188	1429.98	92.1188	1249.38	23.6663	12.6298	5.86664					1249.38	26.8388	1429.98	93.0214	1317.45	39.9272		266.141	17.2999	813.551	1.36515	3.554	14.6157	0.529845	4.67571	4.9468	0.644191	32.4606	10.6526
352	72.7801	329.097	2.29324	0.0798376	2.49668	2.38494	2.82519	0.216655	1.32224	0.436351	1264.18	29.75		1238.09	39.6151	1192.98	96.5663		1192.98	96.5663	1192.98	96.5663	1264.18	29.75	-5.96818	8.93281					1264.18	33.3466	1192.98	98.3818	1238.09	41.2645		178.207	8.91828	891.761	2.36321		7.74325	0.0311411	0.885307	2.79577	0.12564	14.6996	6.41216
419	371.057	20170.7	2.45451	0.080688	0.821541	2.41975	1.54801	0.217501	1.31202	0.793617	1268.65	29.6146		1248.48	21.7989	1213.87	31.6793		1213.87	31.6793	1213.87	31.6793	1268.65	29.6146	-4.51286	3.65944					1268.65	33.1899	1213.87	36.4603	1248.48	24.5467		238.05	8.13885	1497.72	14.1873		19.1	0.146547	2.19607	6.07314	0.375027	34.2899	13.0716
318	83.255	1062.23	1.68635	0.0804803	3.25002	2.41983	3.8299	0.218069	2.0262	0.517856	1271.66	45.8331		1248.51	53.9328	1208.79	125.416		1208.79	125.416	1208.79	125.416	1271.66	45.8331	-5.20106	11.5547					1271.66	47.2196	1208.79	126.443	1248.51	54.7004		514.293	5.76815	718.217	3.35174	1.91441	16.4915	1.68793	9.89184	6.6426	0.875083	23.8392	7.34939
505	116.805	1039.92	0.580891	0.0865417	1.66322	2.61352	2.11465	0.219028	1.30593	0.595959	1276.73	29.6469		1304.44	30.4383	1350.31	62.9072		1350.31	62.9072	1350.31	62.9072	1276.73	29.6469	5.44851	4.92176					1276.73	32.3435	1350.31	64.2495	1304.44	31.9094		190.888	12.9358	1207.43	1.34804		22.0483	0.315679	6.54272	14.2813	2.82997	56.3271	18.1978
512	59.0543	513.382	1.35907	0.0868486	1.8313	2.64588	2.34157	0.220956	1.45921	0.605729	1286.93	33.3655		1313.5	33.819	1357.13	69.199		1357.13	69.199	1357.13	69.199	1286.93	33.3655	5.17285	5.42432					1286.93	35.8267	1357.13	70.4182	1313.5	35.1806		101.245	7.30847	382.498	7.54891		13.3709	0.0332982	1.39982	3.90742	0.153934	17.3906	6.90219
481	160.404	2866.59	1.00392	0.0804196	1.72382	2.45243	2.40022	0.221173	1.67018	0.680957	1288.07	38.2203		1258.14	33.932	1207.31	66.5352		1207.31	66.5352	1207.31	66.5352	1288.07	38.2203	-6.68975	6.6778					1288.07	40.3541	1207.31	67.8584	1258.14	35.1663		256.219	8.68749	2110.12	5.08616	0.644553	13.2413	0.432747	5.7239	12.4087	1.04297	80.8076	30.3335
492	127.577	2084.9	1.04024	0.0855859	1.63655	2.6103	1.98534	0.221201	1.12394	0.539368	1288.22	25.7228		1303.54	28.5672	1328.83	62.0846		1328.83	62.0846	1328.83	62.0846	1288.22	25.7228	3.05674	4.92561					1288.22	28.8421	1328.83	63.4535	1303.54	30.1323		280.114	14.8553	1702.97	4.20325		13.5651	0.346313	4.2915	14.7769	0.900336	74.7927	26.3282
434	77.1109	1439.21	0.836124	0.0789353	2.41304	2.41031	2.73291	0.221463	1.28299	0.452598	1289.6	29.3912		1245.68	38.4407	1170.49	93.6383		1170.49	93.6383	1170.49	93.6383	1289.6	29.3912	-10.1758	9.16466					1289.6	32.0973	1170.49	94.5842	1245.68	39.5321		198.563	14.4289	712.364	11.7861	17.4927	45.4782	3.44312	15.7617	9.34589	0.353581	32.1769	11.5275
497	72.8399	701.939	0.66034	0.0954222	4.44718	2.93638	4.76573	0.223183	1.71312	0.352156	1298.67	39.4942		1391.34	70.7507	1536.42	164.006		1536.42	164.006	1536.42	164.006	1298.67	39.4942	15.4739	9.38182					1298.67	41.6367	1536.42	164.5	1391.34	71.3993		203.423	11.7777	1271.23	8.82187		114.157	0.114645	1.27986	4.17644	0.932044	28.3958	13.4069
435	51.4852	745.348	1.6782	0.0815447	2.38018	2.51688	2.56527	0.223854	0.956737	0.348863	1302.21	22.1107		1276.92	36.5362	1234.61	91.5083		1234.61	91.5083	1234.61	91.5083	1302.21	22.1107	-5.47501	8.02021					1302.21	25.6409	1234.61	92.4586	1276.92	37.6814		144.851	11.6575	437.448	1.90081		1.56182		0.659936	2.70393	0.265813	18.9442	6.18839
423	83.3567	1221.28	1.31972	0.0816084	1.7507	2.5211	2.71605	0.224054	2.07654	0.754104	1303.26	48.0249		1278.14	38.7022	1236.15	67.2922		1236.15	67.2922	1236.15	67.2922	1303.26	48.0249	-5.42895	6.93052					1303.26	49.7636	1236.15	68.5725	1278.14	39.8596		164.881	12.0786	1050	12.6546	0.066154	13.2102	0.122113	1.58525	6.77113	0.582594	42.6073	15.4274
380	43.9004	192.515	2.26062	0.0813556	3.13694	2.51345	3.48682	0.224069	1.52235	0.414627	1303.34	35.2099		1275.93	49.6424	1230.04	120.683		1230.04	120.683	1230.04	120.683	1303.34	35.2099	-5.95923	10.7829					1303.34	38.4813	1230.04	122.105	1275.93	50.9899		370.07		292.868	2.42214	5.21662	18.0104	1.2385	8.73071	2.76983	0.207826	7.26536	2.3428
488	41.5569	578.764	1.32964	0.0881468	2.25133	2.74328	2.55728	0.225716	1.21291	0.455051	1312.01	28.2212		1340.27	37.2976	1385.66	84.7356		1385.66	84.7356	1385.66	84.7356	1312.01	28.2212	5.3157	6.13785					1312.01	31.1803	1385.66	85.7279	1340.27	38.5233		111.878	11.1944	413.012	2.27763		8.36745		0.731721	2.0928	0.15675	15.2814	5.69704
360	93.9516	382.396	3.573	0.0878807	1.89363	2.73726	2.42416	0.225903	1.5135	0.592155	1312.99	35.2389		1338.63	35.3354	1379.9	71.3278		1379.9	71.3278	1379.9	71.3278	1312.99	35.2389	4.84869	5.54189					1312.99	38.5446	1379.9	73.6393	1338.63	37.3486		152.242	5.21011	915.383	7.10054		10.2637		0.407124	1.74989	0.33062	14.9057	5.83211
405	20.0765	187.189	1.19468	0.0810418	3.05532	2.54932	3.7363	0.228147	2.15057	0.561599	1324.78	50.4767		1286.24	53.408	1222.44	117.672		1222.44	117.672	1222.44	117.672	1324.78	50.4767	-8.37147	11.2193					1324.78	52.8808	1222.44	119.08	1286.24	54.6859		214.486	24.3395	967.997	2.08213		2.38967	0.137234	2.05435	4.5117	0.65151	25.727	9.58986
472	62.2585	1894.47	0.887571	0.0844999	2.29648	2.66767	2.60871	0.228968	1.23756	0.455921	1329.09	29.1322		1319.55	37.7618	1304.08	87.4226		1304.08	87.4226	1304.08	87.4226	1329.09	29.1322	-1.91738	7.18823					1329.09	32.0652	1304.08	88.4058	1319.55	38.9547		1220.66	15.1703	1889.43	2.15266	19.0728	55.0189	6.13541	44.729	24.7658	5.35619	106.276	33.7773
474	41.8111	348.478	0.729749	0.0797644	2.8445	2.5185	3.07791	0.228998	1.17574	0.365509	1329.25	27.68		1277.39	43.8457	1191.17	110.048		1191.17	110.048	1191.17	110.048	1329.25	27.68	-11.5917	10.5682					1329.25	30.7502	1191.17	110.856	1277.39	44.7974		164.46	10.5574	560.143	7.55682	0.585653	11.7112	0.257957	3.99257	4.9813	0.192761	21.178	7.44742
503	119.197	3749.12	1.02026	0.0906706	1.08757	2.87052	1.69994	0.229611	1.30651	0.741698	1332.46	30.8257		1374.21	25.0906	1439.68	40.6323		1439.68	40.6323	1439.68	40.6323	1332.46	30.8257	7.44722	3.37754					1332.46	33.6268	1439.68	42.6328	1374.21	26.9345		219.157	11.1046	906.221	3.43023		21.9569	0.0735822	2.5722	5.90907	1.37122	35.4397	13.1024
442	270.379	3935.55	1.30201	0.0916202	1.46284	2.9017	2.01902	0.2297	1.3916	0.668144	1332.92	32.8435		1382.36	29.8831	1459.54	54.5048		1459.54	54.5048	1459.54	54.5048	1332.92	32.8435	8.67493	4.08592					1332.92	35.3989	1459.54	55.9944	1382.36	31.2928		146.334	2.16181	844.896	4.79846		15.7976	0.288963	5.0324	6.38677	0.989665	35.9111	11.4956
333	232.543	1084.53	1.09192	0.0852755	1.79485	2.70541	2.15197	0.230095	1.18723	0.505475	1335	28.0593		1329.94	31.2694	1321.8	68.157		1321.8	68.157	1321.8	68.157	1335	28.0593	-0.998685	5.62391					1335	32.1834	1321.8	70.611	1329.94	33.4877		289.345	7.32598	1697.69	7.30222	0.161454	61.8434	0.209675	4.25995	6.42726	2.20457	33.2671	11.9925
436	14.0507	150.601	1.1757	0.0914049	2.74009	2.90082	3.21369	0.23017	1.67921	0.511556	1335.39	39.6976		1382.13	47.5615	1455.07	102.156		1455.07	102.156	1455.07	102.156	1335.39	39.6976	8.22493	6.99702					1335.39	41.9191	1455.07	102.957	1382.13	48.5584		209.965	24.5606	684.814	2.24396		2.95698	0.188721	2.88449	8.38057	0.755964	35.8001	11.3168
490	19.0864	448.02	0.84247	0.0829959	3.57754	2.63848	4.0182	0.230567	1.82952	0.447188	1337.47	43.3115		1311.44	57.9898	1269.1	136.868		1269.1	136.868	1269.1	136.868	1337.47	43.3115	-5.38686	11.8669					1337.47	45.4202	1269.1	137.505	1311.44	58.7278		210.277	23.3445	837.664	1.29096		7.8304	0.167541	3.9253	8.44235	0.836805	44.3573	13.652
320	212.064	1645.61	1.93536	0.0890176	2.18603	2.84657	3.36863	0.231923	2.56299	0.750807	1344.57	60.9652		1367.9	49.6121	1404.56	82.0624		1404.56	82.0624	1404.56	82.0624	1344.57	60.9652	4.2711	7.0797					1344.57	62.0607	1404.56	83.5368	1367.9	50.4521		326.876	10.7605	723.012	1.01452		8.91644	0.307362	4.40391	11.1949	4.41314	39.0393	9.41418
478	92.3038	983.645	0.999675	0.0911639	2.07004	2.91736	2.41302	0.232095	1.24	0.493936	1345.47	29.5132		1386.42	35.7637	1450.03	77.2285		1450.03	77.2285	1450.03	77.2285	1345.47	29.5132	7.21088	5.34467					1345.47	32.474	1450.03	78.2965	1386.42	37.1		162.645	34.6892	1144.49	5.11317	0.0326689	6.74403	0.200164	4.57734	9.1696	1.1887	54.5804	18.0589
447	137.669	818.29	1.19142	0.0921343	1.99743	2.9556	3.66134	0.23266	3.06849	0.832798	1348.43	73.1777		1396.28	54.4451	1470.14	74.318		1470.14	74.318	1470.14	74.318	1348.43	73.1777	8.27893	6.80258					1348.43	74.3437	1470.14	75.4155	1396.28	55.1943		107.839	7.16296	441.285	1.59174		20.4265	0.148779	3.01451	5.50613	1.62302	22.267	6.92322
458	82.562	346.147	0.926448	0.085023	1.76478	2.75033	1.97343	0.23461	0.883158	0.413379	1358.62	21.2046		1342.18	28.802	1316.05	67.0695		1316.05	67.0695	1316.05	67.0695	1358.62	21.2046	-3.23461	5.50232					1358.62	25.1928	1316.05	68.339	1342.18	30.3795		178.169	8.401	680.101	1.49286		11.923	0.0734959	1.45334	3.81031	1.14986	24.1543	8.17404
417	40.4792	187.891	1.47581	0.0860787	2.31642	2.786	2.60713	0.234738	1.19637	0.423632	1359.28	28.7375		1351.79	38.1811	1339.95	87.7394		1339.95	87.7394	1339.95	87.7394	1359.28	28.7375	-1.44315	6.98012					1359.28	32.8546	1339.95	89.5193	1351.79	39.9775		188.564	27.2004	545.393	2.32113	0.0627757	8.00765	0.0309207	0.870047	3.04624	0.361771	12.8856	4.6843
424	45.5669	2918.49	0.63114	0.106043	6.42029	3.46004	7.03117	0.236645	2.86658	0.404774	1369.23	69.309		1518.16	108.557	1732.48	230.866		1732.48	230.866	1732.48	230.866	1369.23	69.309	20.9669	11.266					1369.23	70.7111	1732.48	231.195	1518.16	108.976		200.907	18.1752	879.761	0.764169		11.7294	0.331231	5.31997	12.7256	2.21768	47.0739	14.9511
402	50.3621	794.905	1.38497	0.0826499	1.86404	2.71676	2.50494	0.238401	1.67333	0.641076	1378.38	40.7009		1333.05	36.4393	1260.97	71.3951		1260.97	71.3951	1260.97	71.3951	1378.38	40.7009	-9.31063	6.98017					1378.38	43.8311	1260.97	73.6787	1333.05	38.3642		151.109	15.0442	1056.94	2.88256		5.72096	0.142081	3.71936	6.381	0.448526	31.9675	10.0518
354	360.265	3274.01	3.61878	0.0937408	1.38722	3.08908	2.35333	0.239001	1.901	0.781358	1381.5	46.3323		1429.99	35.3812	1502.88	51.3877		1502.88	51.3877	1502.88	51.3877	1381.5	46.3323	8.07628	4.40268					1381.5	49.0827	1502.88	54.4539	1429.99	37.3706		384.987	9.94221	1450.68	2.57575		6.4755	0.597132	6.89493	10.6704	2.91189	39.2126	13.706
389	78.5769	1588.89	2.1129	0.0852358	2.33104	2.82104	2.65782	0.240041	1.27682	0.446392	1386.91	31.2287		1361.14	39.0516	1320.9	88.5289		1320.9	88.5289	1320.9	88.5289	1386.91	31.2287	-4.99729	7.42361					1386.91	35.2649	1320.9	90.3897	1361.14	40.8807		176.874	2.97748	728.45	3.78333		5.68366	0.0582478	0.897051	1.91837	0.322461	13.9926	6.32424
517	87.546	466.52	1.24812	0.0922655	1.90248	3.06364	2.47823	0.240822	1.58814	0.625698	1390.97	38.9448		1423.65	37.1835	1472.84	70.7595		1472.84	70.7595	1472.84	70.7595	1390.97	38.9448	5.55877	5.25149					1390.97	41.3734	1472.84	71.9147	1423.65	38.5081		138.909	16.0128	644.079	2.71347		7.34531	0.0502961	3.31047	5.34795	0.633047	35.3357	10.6717
370	62.0292	1042.73	1.70446	0.1005	2.3587	3.33944	2.86921	0.240994	1.63367	0.544317	1391.86	40.0845		1490.32	43.9428	1633.36	85.8904		1633.36	85.8904	1633.36	85.8904	1391.86	40.0845	14.7855	5.10902					1391.86	43.3428	1633.36	87.6854	1490.32	45.7479		220.016	15.6046	1347.48	1.5296	0.0282677	4.33479	0.243243	5.0972	8.63152	0.742086	40.2202	13.6859
39	105.588	2157.13	1.20485	0.0830759	1.77548	2.7663	2.66184	0.241503	1.9832	0.72973	1394.51	48.7434		1346.49	38.9092	1271.01	67.906		1271.01	67.906	1271.01	67.906	1394.51	48.7434	-9.71658	7.00488					1394.51	51.7894	1271.01	69.6263	1346.49	40.7229		248.622	2.91519	742.229	2.54621		14.153	0.0491636	0.834604	3.78391	0.288536	17.3792	5.96451
390	114.091	4251.31	0.900969	0.0887802	1.87805	2.96776	2.3101	0.242444	1.34518	0.545204	1399.39	33.1658		1399.4	34.3875	1399.43	70.5509		1399.43	70.5509	1399.43	70.5509	1399.39	33.1658	0.00294419	5.57053					1399.39	37.051	1399.43	72.8205	1399.4	36.5126		206.184	14.102	1076.86	2.32859	0.045656	30.8984	0.0874788	2.29562	4.78044	1.33462	24.7351	8.04381
426	81.4797	1071.46	0.712865	0.0972525	1.55935	3.25132	4.45744	0.24247	4.17579	0.933647	1399.52	102.964		1469.49	67.8434	1572.1	57.2365		1572.1	57.2365	1572.1	57.2365	1399.52	102.964	10.9775	7.30753					1399.52	103.95	1572.1	58.6072	1469.49	68.7208		277.635	46.5256	772.478	4.74684	0.148294	46.3432	0.493041	11.3807	25.2327	10.4973	68.1118	19.6181
509	100.317	5753.83	1.5438	0.0923174	1.83042	3.09321	2.07503	0.24301	0.9774	0.441624	1402.33	24.1433		1431.01	31.2072	1473.93	68.0686		1473.93	68.0686	1473.93	68.0686	1402.33	24.1433	4.85762	4.68925					1402.33	27.9421	1473.93	69.2696	1431.01	32.775		987.325	9.5493	784.002	1.44931	15.354	39.9126	5.43258	37.3079	13.782	0.18789	37.5297	12.1466
351	44.7747	245.841	1.68201	0.0903968	8.04505	3.03035	9.20708	0.24313	4.47744	0.483434	1402.95	110.643		1415.29	137.771	1433.94	300.798		1433.94	300.798	1433.94	300.798	1402.95	110.643	2.16142	21.9261					1402.95	111.971	1433.94	301.347	1415.29	138.318		231.94	12.4974	1535.11	3.54537		14.5618	0.142959	3.63383	7.98984	0.935943	40.6825	14.5038
460	48.6232	316.197	0.861255	0.0840692	2.87367	2.81988	3.05921	0.243273	1.04916	0.324404	1403.69	25.9384		1360.84	44.9444	1294.15	109.549		1294.15	109.549	1294.15	109.549	1403.69	25.9384	-8.46372	9.39756					1403.69	29.4819	1294.15	110.336	1360.84	45.9349		152.549	16.6267	741.034	2.97704		6.67729	0.0860436	3.05696	6.86968	0.263544	36.4717	12.503
483	138.614	69515.3	0.937345	0.0929822	1.23737	3.12925	1.92555	0.244084	1.47535	0.745185	1407.89	36.5729		1439.91	29.0409	1487.53	45.9304		1487.53	45.9304	1487.53	45.9304	1407.89	36.5729	5.35369	3.81905					1407.89	39.1801	1487.53	47.6874	1439.91	30.6526		198.549	9.91289	762.395	4.11162		22.6868		1.58246	4.86795	0.551716	25.5063	10.163
392	119.716	321.683	1.90601	0.0949352	2.33772	3.19814	2.6117	0.244326	1.16449	0.408144	1409.15	28.8899		1456.71	39.5958	1526.79	86.3218		1526.79	86.3218	1526.79	86.3218	1409.15	28.8899	7.70511	5.55067					1409.15	33.3217	1526.79	88.1157	1456.71	41.5136		465.141	12.5319	846.34	2.39433	2.27091	14.1705	1.47989	8.61029	5.88745	0.77043	21.5643	6.86835
508	196.199	851.408	1.38681	0.0894716	1.0771	3.0171	1.67517	0.24457	1.28298	0.738132	1410.41	31.8551		1411.95	25.0393	1414.28	40.3802		1414.28	40.3802	1414.28	40.3802	1410.41	31.8551	0.273639	3.63053					1410.41	34.8349	1414.28	42.4054	1411.95	26.8328		219.383	3.27528	793.081	7.40595	6.28742	31.4531	2.46639	13.845	10.3136	0.489977	32.8462	10.8313
381	89.5305	742.367	1.24227	0.0853103	2.18154	2.87981	2.70344	0.244828	1.5967	0.563667	1411.75	39.678		1376.64	39.9352	1322.61	82.8306		1322.61	82.8306	1322.61	82.8306	1411.75	39.678	-6.73924	7.32701					1411.75	43.042	1322.61	84.8313	1376.64	41.7655		99.002	14.529	531.19	4.78139	0.268597	11.141	0.0903911	1.44442	1.96767	0.326023	13.3008	5.17392
341	111.29	3124.44	1.84781	0.0918841	2.76763	3.10269	3.10206	0.244904	1.40107	0.424433	1412.14	34.8253		1433.36	46.6881	1464.98	103.046		1464.98	103.046	1464.98	103.046	1412.14	34.8253	3.60678	7.1849					1412.14	38.5837	1464.98	104.626	1433.36	48.3112		605.885	20.2666	1450.79	1.47059	0.566334	7.03863	0.406064	5.33642	7.45679	1.71255	42.7741	13.8534
342	113.647	45806.8	1.54321	0.0894374	1.34091	3.31298	1.79632	0.268657	1.1953	0.6103	1533.98	31.9819		1484.11	27.4606	1413.53	50.2757		1413.53	50.2757	1413.53	50.2757	1413.53	50.2757	-8.5211	4.47407					1533.98	36.6406	1413.53	53.4824	1484.11	30.2339		479.269	11.2845	1551.35	2.09385		3.90187		2.59226	5.14998	0.194537	33.3167	11.7239
471	85.9899	1822.68	1.44504	0.0867888	1.48691	2.93637	1.78565	0.245384	0.988759	0.519947	1414.62	24.6154		1391.34	26.5092	1355.79	56.1961		1355.79	56.1961	1355.79	56.1961	1414.62	24.6154	-4.33935	4.69039					1414.62	28.395	1355.79	57.692	1391.34	28.2907		139.732	6.66642	615.664	5.47092		12.396	0.0512422	1.42333	3.47308	0.0974995	20.5856	8.46248
425	135.676	892.487	1.17872	0.0923015	1.29298	3.12532	1.65734	0.245575	1.03682	0.591311	1415.62	25.8281		1438.94	24.9882	1473.59	48.0849		1473.59	48.0849	1473.59	48.0849	1415.62	25.8281	3.93412	3.59147					1415.62	29.3675	1473.59	49.7504	1438.94	26.8629		207.248	20.0426	643.902	4.4105		21.2189	0.0237406	2.95829	6.14027	1.23684	23.8864	9.5656
364	237.695	2345.45	1.98291	0.0893407	1.33008	3.03834	1.64644	0.246653	0.970395	0.515622	1421.19	24.2584		1417.31	24.6528	1411.45	49.8844		1411.45	49.8844	1411.45	49.8844	1421.19	24.2584	-0.689745	3.95193					1421.19	29.5106	1411.45	53.1037	1417.31	27.5911		201.792	4.99452	1058.01	3.44114		11.007	0.02158	1.49164	3.79057	0.304729	23.7936	8.91527
511	101.044	862.445	2.6905	0.0955179	1.56253	3.25159	2.07972	0.246893	1.3725	0.639058	1422.43	34.3372		1469.56	31.6545	1538.31	57.609		1538.31	57.609	1538.31	57.609	1422.43	34.3372	7.53294	4.11991					1422.43	37.1709	1538.31	58.9989	1469.56	33.2289		323.233	16.7719	625.961	0.837567		3.21012	0.0618331	0.830252	4.19317	0.294127	24.7538	8.42016
367	234.519	3657.39	2.07391	0.0923611	1.08689	3.15304	1.56124	0.247593	1.12077	0.650617	1426.05	28.1032		1445.74	23.5895	1474.83	40.4138		1474.83	40.4138	1474.83	40.4138	1426.05	28.1032	3.3073	3.26366					1426.05	32.766	1474.83	44.257	1445.74	26.6781		543.618	15.1134	1520.6	1.54142		6.53902	0.111562	3.11104	7.48211	0.929586	35.0186	11.8394
467	42.8453	3023.18	0.666475	0.0900336	1.87792	3.26846	2.24135	0.263292	1.22354	0.524162	1506.66	32.22		1473.58	34.156	1426.26	70.2873		1426.26	70.2873	1426.26	70.2873	1426.26	70.2873	-5.63708	5.6749					1506.66	35.5349	1426.26	71.4652	1473.58	35.6395		211.736	25.4127	630.577	1.3905		13.1805	0.0854349	2.56456	4.93782	0.714888	26.2757	9.37195
358	75.5849	1379.19	1.92233	0.0879282	2.29332	3.00351	2.69889	0.247742	1.4229	0.496449	1426.82	35.6963		1408.51	40.2957	1380.89	86.3729		1380.89	86.3729	1380.89	86.3729	1426.82	35.6963	-3.32579	6.96068					1426.82	39.4619	1380.89	88.2921	1408.51	42.1504		179.064	7.77371	682.037	0.895471		3.77234	0.050892	1.31306	2.73226	0.489981	15.5006	5.73901
445	97.7935	2001.55	1.12854	0.0862592	2.26113	2.97502	2.90063	0.25014	1.81686	0.615109	1439.2	45.9324		1401.26	43.2045	1344	85.5964		1344	85.5964	1344	85.5964	1439.2	45.9324	-7.08312	7.62829					1439.2	48.0983	1344	86.5839	1401.26	44.3101		121.581	3.44585	617.154	3.50976		8.00968	0.224261	2.90036	5.15138	0.352496	26.8444	8.40588
324	119.752	267.465	1.73355	0.0878768	1.16325	3.04308	1.60055	0.251153	1.09937	0.638042	1444.42	27.8834		1418.5	23.9749	1379.81	43.8171		1379.81	43.8171	1379.81	43.8171	1444.42	27.8834	-4.68283	3.89034					1444.42	30.599	1379.81	46.516	1418.5	25.8612		959.401	61.2713	1292.37	2.33931	0.733594	15.3644	0.608614	6.89174	7.97345	0.728416	34.3385	11.1604
322	128.352	1048.17	2.08002	0.0928203	2.6814	3.21868	2.95718	0.251497	1.24699	0.398318	1446.19	31.6621		1461.67	44.9019	1484.21	99.5779		1484.21	99.5779	1484.21	99.5779	1446.19	31.6621	2.56117	6.8766					1446.19	34.0875	1484.21	100.764	1461.67	45.9663		358.245	13.2957	961.265	2.52703	1.23448	20.8695	0.538961	7.09845	5.4306	1.16972	23.9769	8.09983
344	115.879	716.095	1.48073	0.0915319	1.71125	3.18182	2.072	0.252117	1.16825	0.514932	1449.38	29.7212		1452.76	31.3751	1457.69	63.7768		1457.69	63.7768	1457.69	63.7768	1449.38	29.7212	0.569974	4.80437					1449.38	34.2428	1457.69	66.3043	1452.76	33.7836		258.686	15.2381	1641.24	1.91019	0.0683269	10.4901	0.18539	4.03415	9.45672	0.458873	42.5283	14.3335
485	145.896	4518.38	0.918248	0.0919673	1.51791	3.20003	2.31165	0.25236	1.74346	0.739395	1450.63	44.3892		1457.17	35.0517	1466.71	56.5022		1466.71	56.5022	1466.71	56.5022	1450.63	44.3892	1.09642	4.86579					1450.63	46.6543	1466.71	57.9477	1457.17	36.3853		133.647	17.2529	1094.29	1.25755		6.57532	0.337699	5.54712	11.9449	0.708111	57.5916	19.0235
443	53.1132	657.557	0.842293	0.0926889	2.37403	3.22659	2.85754	0.252473	1.59044	0.543531	1451.22	40.5079		1463.57	43.4142	1481.53	88.1946		1481.53	88.1946	1481.53	88.1946	1451.22	40.5079	2.04582	6.44037					1451.22	43.0108	1481.53	89.1177	1463.57	44.5788		417.033	21.2848	689.067	1.19792	1.583	20.6275	0.588042	5.54659	6.76368	1.7792	25.5357	9.13311
366	274.01	1359.06	2.28445	0.0913208	0.891746	3.21114	1.67249	0.255028	1.41493	0.796244	1464.35	36.3282		1459.85	25.3811	1453.29	33.2545		1453.29	33.2545	1453.29	33.2545	1464.35	36.3282	-0.761201	3.40067					1464.35	40.1994	1453.29	37.8595	1459.85	28.248		369.147	3.0589	1896.48	1.17261		3.70866	0.212899	4.17945	9.05742	0.5948	51.6574	15.8973
439	114.085	1649.84	1.16846	0.0902731	2.24283	3.18359	2.66145	0.255775	1.43285	0.522847	1468.19	36.8741		1453.19	40.3063	1431.31	83.888		1431.31	83.888	1431.31	83.888	1468.19	36.8741	-2.57626	6.54064					1468.19	39.6123	1431.31	84.8696	1453.19	41.5222		156.199	7.24837	905.427	4.58862		13.6954	0.124886	2.89075	7.26417	0.499009	38.75	13.387
33	162.14	600.326	3.96332	0.089905	1.1715	3.18914	1.84373	0.257269	1.4237	0.74138	1475.86	36.8088		1454.53	27.9339	1423.5	43.8643		1423.5	43.8643	1423.5	43.8643	1475.86	36.8088	-3.67768	4.11008					1475.86	41.1586	1423.5	46.3767	1454.53	30.5066		254.027	4.34791	665.534	1.01741		2.85185	0.0430023	0.980056	1.77136	0.0254205	15.1364	5.64946
480	68.7786	1236.99	0.803999	0.0907094	2.43789	3.24612	2.87331	0.259544	1.52073	0.515603	1487.51	39.5935		1468.25	43.716	1440.53	91.0685		1440.53	91.0685	1440.53	91.0685	1487.51	39.5935	-3.26108	7.08305					1487.51	42.2885	1440.53	91.9783	1468.25	44.8793		174.489	38.3679	504.729	4.69569		28.4197		0.816712	2.77155	0.232389	13.3336	5.95403
336	66.5639	7292.06	0.822107	0.0975685	2.07164	3.4971	2.76772	0.259955	1.83536	0.639873	1489.61	47.8453		1526.56	42.8335	1578.14	75.9815		1578.14	75.9815	1578.14	75.9815	1489.61	47.8453	5.60983	5.46299					1489.61	50.9224	1578.14	78.0453	1526.56	44.7278		336.212	10.58	1723.46	3.30668		37.7468	0.171924	5.24018	8.68517	2.38719	48.0975	14.8363
337	179.565	9932.79	1.34429	0.0980415	2.56038	3.52916	2.96654	0.261072	1.49828	0.47847	1495.32	39.1911		1533.77	46.0035	1587.19	93.7956		1587.19	93.7956	1587.19	93.7956	1495.32	39.1911	5.788	6.09049					1495.32	42.8951	1587.19	95.4716	1533.77	47.7492		271.382	13.0884	951.907	3.36182	0.054578	19.7769	0.222924	2.12788	3.94112	1.20601	26.3034	8.66312
466	132.368	1048.09	0.509686	0.0958945	1.13115	3.76129	1.6795	0.284474	1.24146	0.710603	1613.85	34.7394		1584.52	26.4045	1545.7	41.6642		1545.7	41.6642	1545.7	41.6642	1545.7	41.6642	-4.4096	3.60165					1613.85	38.1884	1545.7	43.5615	1584.52	28.3312		184.328	2.74032	679.667	4.07074		44.68	0.0221106	2.87355	4.78075	0.865185	24.9351	8.36006
387	160.393	3656.9	2.21939	0.0968099	1.88301	3.53776	2.31313	0.265037	1.34345	0.543573	1515.56	35.5631		1535.7	35.89	1563.52	69.1954		1563.52	69.1954	1563.52	69.1954	1563.52	69.1954	3.06735	4.85556					1515.56	39.7424	1563.52	71.4169	1535.7	38.0987		428.976	6.121	1257.71	1.4008		3.66423	0.0941278	2.54852	6.51219	0.876041	29.1609	10.6318
450	117.165	2195.21	0.522865	0.0981861	2.12364	4.02178	2.50883	0.297076	1.33581	0.514722	1676.79	38.6564		1638.61	39.9869	1589.96	77.7674		1589.96	77.7674	1589.96	77.7674	1589.96	77.7674	-5.461	5.70251					1676.79	41.9559	1589.96	78.7849	1638.61	41.3361		152.261	18.5005	879.095	3.27165		37.3526	0.831394	13.1059	18.0295	1.69594	59.5836	16.1427
452	124.854	1778.64	0.340865	0.0988642	1.53169	4.09106	1.91879	0.30012	1.15572	0.575511	1691.9	33.7084		1652.52	30.686	1602.82	55.9963		1602.82	55.9963	1602.82	55.9963	1602.82	55.9963	-5.55833	4.24534					1691.9	37.5271	1602.82	57.3976	1652.52	32.4302		239.038	16.5054	1285.95	6.10105	0.0862669	102.315	0.354206	5.51582	11.5601	3.35105	55.4078	18.5042
455	61.0074	813.791	0.543881	0.0993105	1.86267	3.89399	2.37391	0.28438	1.47171	0.602926	1613.38	41.1719		1612.44	37.5909	1611.19	68.0235		1611.19	68.0235	1611.19	68.0235	1611.19	68.0235	-0.136242	4.93998					1613.38	44.1406	1611.19	69.1797	1612.44	39.0615		211.871	14.7559	1110.99	2.81344		35.2507	0.29194	6.4855	9.20822	1.00809	47.3484	17.2688
411	108.709	9861.49	2.03798	0.100182	1.66483	3.94992	2.11475	0.285955	1.30403	0.576408	1621.29	36.6382		1623.98	33.5842	1627.46	60.67		1627.46	60.67	1627.46	60.67	1627.46	60.67	0.379599	4.34281					1621.29	41.1272	1627.46	63.0517	1623.98	35.9952		113.146	3.26241	469.556	1.56192		12.8981	0.0219349	0.608167	1.34268	0.217407	8.32283	3.09088
514	117.147	709.184	0.541108	0.100188	1.36946	3.83507	1.89493	0.277624	1.30972	0.667157	1579.38	35.9588		1600.14	29.9123	1627.57	49.9055		1627.57	49.9055	1627.57	49.9055	1627.57	49.9055	2.96049	3.70605					1579.38	39.1935	1627.57	51.4668	1600.14	31.6635		286.469	16.3175	927.733	4.13238		57.1168	0.145288	5.28471	10.0974	2.97329	44.7287	13.3894
427	154.285	6056.01	0.651849	0.100321	0.988598	3.85913	1.1794	0.278994	0.643166	0.46762	1586.3	17.7266		1605.18	18.6414	1630.03	36.015		1630.03	36.015	1630.03	36.015	1630.03	36.015	2.68315	2.40955					1586.3	23.5972	1630.03	38.1254	1605.18	21.338		317.884	28.0362	1277.76	5.83234		63.7181	0.455273	7.1351	14.9284	5.73203	50.6778	20.511
507	60.6231	863.58	0.638934	0.100978	1.38587	4.10717	2.10777	0.294993	1.58809	0.735628	1666.43	45.7083		1655.73	33.7342	1642.19	50.4083		1642.19	50.4083	1642.19	50.4083	1642.19	50.4083	-1.47657	4.17731					1666.43	48.584	1642.19	51.9503	1655.73	35.4301		173.048	24.1281	472.464	1.56507		23.6043	0.117314	2.89182	4.45715	1.03491	20.9353	6.08192
484	182.784	1193	0.537534	0.101058	1.43086	3.99314	2.12067	0.286578	1.56521	0.72009	1624.41	44.0508		1632.8	33.752	1643.64	52.0347		1643.64	52.0347	1643.64	52.0347	1643.64	52.0347	1.17035	4.1197					1624.41	46.7691	1643.64	53.5303	1632.8	35.1537		288.508	18.0305	1084.4	9.81349	2.33427	68.9318	0.836058	5.13624	7.92598	1.39254	35.0158	13.474
433	61.3989	369.37	0.737454	0.101845	1.63745	3.9253	2.09194	0.279531	1.30191	0.600645	1589	35.9364		1618.91	33.1799	1658.04	59.438		1658.04	59.438	1658.04	59.438	1658.04	59.438	4.16374	4.06213					1589	39.1569	1658.04	60.734	1618.91	34.8071		237.502	16.4369	1013.37	3.31479		14.8075	0.159487	4.8343	6.38938	1.11268	50.6626	15.3804
459	64.2004	1316.24	0.672026	0.101921	1.46521	3.97258	2.02566	0.282687	1.39874	0.669503	1604.88	38.9489		1628.61	32.2065	1659.41	53.1766		1659.41	53.1766	1659.41	53.1766	1659.41	53.1766	3.286	3.88774					1604.88	42.0442	1659.41	54.631	1628.61	33.9241		300.476	12.1132	915.272	2.4958		20.3406		1.65571	3.94828	0.353111	26.249	11.4368
365	279.842	6659	1.34176	0.102192	0.660798	4.02781	1.31165	0.285859	1.13304	0.784559	1620.8	31.8257		1639.83	20.9119	1664.29	23.9675		1664.29	23.9675	1664.29	23.9675	1664.29	23.9675	2.61322	2.37142					1620.8	37.0011	1664.29	29.7387	1639.83	24.6443		200.577	1.0815	928.762	4.93042		41.0616	0.0641442	1.33488	2.99063	0.885185	16.6119	6.56898
406	81.7854	1299.16	1.34873	0.102395	1.63546	4.25552	2.16944	0.30142	1.42539	0.620738	1698.35	41.7121		1684.8	34.9599	1667.99	59.2905		1667.99	59.2905	1667.99	59.2905	1667.99	59.2905	-1.81994	4.3992					1698.35	46.0539	1667.99	61.7281	1684.8	37.3777		195.265	4.97191	715.07	1.35157		16.8259		0.567717	2.2834	0.157153	15.8972	5.5461
339	153.676	1010.46	1.28593	0.102514	1.43143	4.19204	1.96057	0.296581	1.33972	0.638314	1674.33	38.7196		1672.47	31.5033	1670.13	51.8794		1670.13	51.8794	1670.13	51.8794	1670.13	51.8794	-0.251477	3.88233					1674.33	43.2561	1670.13	54.7915	1672.47	34.1718		960.672	69.9742	2727.6	2.37863		17.7419	0.219728	4.61934	8.27046	2.51174	60.2523	19.6308
416	142.14	2697.06	0.890756	0.102655	1.75369	3.74101	3.55076	0.264305	3.08747	0.859475	1511.83	81.5514		1580.19	55.7604	1672.69	63.5385		1672.69	63.5385	1672.69	63.5385	1672.69	63.5385	9.61666	5.96302					1511.83	83.4096	1672.69	65.775	1580.19	57.1913		374.953	30.3181	1685.23	5.35678	0.0304986	54.0966	0.42873	7.75619	12.4799	5.79605	57.4394	16.7246
482	107.261	7970.51	0.856326	0.102868	2.05955	3.97271	2.68765	0.280095	1.72676	0.62962	1591.84	47.7386		1628.64	42.7319	1676.51	74.584		1676.51	74.584	1676.51	74.584	1676.51	74.584	5.05037	5.09423					1591.84	50.2319	1676.51	75.6262	1628.64	43.9759		149.622	1.26937	1706.89	3.46962		26.2131	0.857493	14.3233	22.3328	0.990594	94.0724	28.6275
36	75.5142	850.33	1.45276	0.10307	1.79262	4.29749	2.20105	0.302399	1.27715	0.551476	1703.19	37.4672		1692.88	35.5353	1680.13	64.8878		1680.13	64.8878	1680.13	64.8878	1680.13	64.8878	-1.37233	4.50562					1703.19	42.8894	1680.13	66.5008	1692.88	37.9172		257.963	10.267	665.911	0.926115	0.182423	15.2824	0.14685	1.34645	3.52863	0.710046	15.5472	5.80453
444	47.7179	911.773	0.858861	0.10313	1.45121	4.55384	2.14777	0.320252	1.58333	0.719754	1790.96	48.5267		1740.86	35.0476	1681.22	52.5219		1681.22	52.5219	1681.22	52.5219	1681.22	52.5219	-6.52778	4.40531					1790.96	51.5603	1681.22	53.9808	1740.86	36.7375		139.958		590.69	1.07105		25.9212	0.135761	3.86765	7.89468	0.308422	32.6391	9.59516
475	23.8615	1496.7	0.438509	0.103294	2.63869	4.14879	2.88227	0.291304	1.15964	0.384488	1648.04	33.0535		1663.97	46.2207	1684.12	95.4652		1684.12	95.4652	1684.12	95.4652	1684.12	95.4652	2.14243	5.88407					1648.04	36.832	1684.12	96.2797	1663.97	47.4162		174.093	18.6447	592.228	1.28475	0.0158366	27.6515	0.167083	2.95647	5.41059	1.78031	29.1806	9.08085
486	79.6119	950.806	0.603664	0.103342	1.8533	4.32606	2.35637	0.30361	1.45527	0.600178	1709.18	42.8237		1698.34	38.0905	1685	67.0424		1685	67.0424	1685	67.0424	1685	67.0424	-1.43545	4.76944					1709.18	45.984	1685	68.1977	1698.34	39.5787		1584.24	0.483293	787.974	3.4022	66.501	165.858	18.2166	89.1101	16.9041	1.71352	37.4916	10.336
438	88.5342	1060.91	0.779748	0.10362	1.49668	3.83018	1.7962	0.268087	0.993119	0.51972	1531.08	26.5278		1599.11	28.3463	1689.96	54.1076		1689.96	54.1076	1689.96	54.1076	1689.96	54.1076	9.40126	3.2982					1531.08	30.5024	1689.96	55.5188	1599.11	30.1995		146.73	44.8857	604.329	4.09592		26.4545	0.0209213	1.94008	5.6808	1.82768	23.3546	7.11556
359	105.309	94183.1	2.23797	0.104313	1.4785	4.41899	1.82612	0.307244	1.07181	0.526577	1727.13	31.8286		1715.91	29.6361	1702.24	53.3676		1702.24	53.3676	1702.24	53.3676	1702.24	53.3676	-1.46221	3.68983					1727.13	37.5428	1702.24	56.1775	1715.91	32.5415		165.557	5.05122	864.192	3.63329		12.2912	0.0686345	0.70431	4.10992		21.4024	7.04737
428	46.6792	21761.7	0.979087	0.104361	1.90595	4.19397	2.53656	0.291465	1.67376	0.645967	1648.85	47.7278		1672.84	40.7621	1703.09	68.7889		1703.09	68.7889	1703.09	68.7889	1703.09	68.7889	3.18528	4.8109					1648.85	50.378	1703.09	69.8966	1672.84	42.1673		117.988	3.27905	277.674	2.45647		23.3899	0.0466135	0.0679069	1.22522	0.337713	7.45269	2.64621
457	68.4995	1454.66	0.424247	0.104774	1.7908	4.38459	3.2297	0.303511	2.68775	0.825345	1708.7	79.0722		1709.44	52.3389	1710.34	64.5744		1710.34	64.5744	1710.34	64.5744	1710.34	64.5744	0.0961731	5.96666					1708.7	80.8689	1710.34	65.7616	1709.44	53.526		216.463	17.4785	1165.93	2.42678	0.0188513	33.2301	0.406557	8.87092	12.065	1.54078	59.2583	19.1147
374	251.059	3041.12	1.42942	0.105525	1.29849	4.09623	1.90242	0.28153	1.39037	0.686572	1599.06	38.5923		1653.55	30.4317	1723.49	46.7446		1723.49	46.7446	1723.49	46.7446	1723.49	46.7446	7.21926	3.36843					1599.06	42.8413	1723.49	49.8856	1653.55	33.1193		241.343	31.6507	2089.13	6.10005	0.047704	27.7029	0.575902	10.7189	15.5014	1.02463	74.2786	22.0409
391	66.4851	1920.3	0.847148	0.105855	3.19321	4.21858	3.47389	0.289037	1.36797	0.369609	1636.71	38.756		1677.64	55.8877	1729.22	114.871		1729.22	114.871	1729.22	114.871	1729.22	114.871	5.34932	6.6751					1636.71	43.1534	1729.22	116.158	1677.64	57.4288		360.073	32.6531	2163.66	2.44177		14.4087	0.797346	11.0606	18.439	4.26282	74.7463	24.2113
400	67.962	305.967	0.967129	0.105883	3.32149	4.13066	3.58757	0.282939	1.35585	0.354585	1606.15	37.7811		1660.39	57.482	1729.69	119.478		1729.69	119.478	1729.69	119.478	1729.69	119.478	7.14264	6.77583					1606.15	42.124	1729.69	120.702	1660.39	58.9542		367.136	55.5813	1047.16	2.24173		26.0795	0.129815	2.71515	5.22948	1.14097	24.4148	8.50367
345	133.724	1305.81	1.15816	0.106329	1.51428	4.14659	2.02749	0.282838	1.34821	0.621665	1605.64	37.5576		1663.54	32.5099	1737.41	54.418		1737.41	54.418	1737.41	54.418	1737.41	54.418	7.58395	3.61271					1605.64	41.9252	1737.41	57.1579	1663.54	35.111		229.099	17.3921	3282.54	2.92485	0.014011	3.65352	0.346749	10.2675	18.3494	3.46268	101.267	31.872
369	136.411	1653.66	0.706255	0.106956	1.3498	4.32924	2.58599	0.293566	2.20576	0.832357	1659.33	63.2486		1698.95	41.808	1748.18	48.442		1748.18	48.442	1748.18	48.442	1748.18	48.442	5.08263	4.47297					1659.33	66.1005	1748.18	51.4727	1698.95	43.8766		1750.52	12.154	1571.92	3.55736	21.1708	64.7068	3.47695	20.1988	12.6758	2.86762	42.6302	13.7398
404	63.8288	304.733	1.12692	0.107522	1.73938	4.68143	2.28058	0.315778	1.47499	0.613297	1769.08	44.7264		1763.93	37.3983	1757.83	62.3484		1757.83	62.3484	1757.83	62.3484	1757.83	62.3484	-0.639686	4.3836					1769.08	49.0993	1757.83	64.6267	1763.93	39.7612		188.949	12.223	1168.28	4.73632		15.8536	0.095617	3.41118	5.97166	0.221226	30.4213	9.75705
449	173.586	18181.8	2.23817	0.109826	1.00712	4.92095	1.74173	0.324971	1.42103	0.791884	1813.96	44.0369		1805.86	28.8088	1796.52	35.9277		1796.52	35.9277	1796.52	35.9277	1796.52	35.9277	-0.970631	3.17584					1813.96	47.2878	1796.52	37.9728	1805.86	30.5501		97.7086	10.669	291.534	1.53061		11.9209	0.0705924	0.400165	0.406642	0.117746	8.42823	3.64315
498	134.482	14554.5	1.17673	0.110514	0.977215	5.19537	2.08413	0.340957	1.84082	0.8677	1891.27	59.1387		1851.86	34.7824	1807.89	34.8122		1807.89	34.8122	1807.89	34.8122	1807.89	34.8122	-4.61219	3.84163					1891.27	61.7441	1807.89	36.9242	1851.86	36.2049		112.513	5.12983	366.852	2.12587		10.6969		0.787156	2.3209		10.8364	4.75483
393	175.792	929.158	1.14217	0.112006	2.07302	4.59522	2.54737	0.297552	1.48044	0.550774	1679.16	42.8948		1748.4	41.6359	1832.22	73.63		1832.22	73.63	1832.22	73.63	1832.22	73.63	8.35396	4.36402					1679.16	47.0616	1832.22	75.5682	1748.4	43.7284		849.461	7.92938	1503.94	3.9494	11.4401	60.7867	3.82894	20.9184	9.90617	2.4751	38.8311	12.5307
42	205.024	741.422	2.98805	0.1165	1.25	5.53653	2.09723	0.344675	1.684	0.780082	1909.12	54.5394		1906.29	35.3527	1903.21	44.0196		1903.21	44.0196	1903.21	44.0196	1903.21	44.0196	-0.310534	3.68711					1909.12	59.04	1903.21	46.2404	1906.29	37.5731		136.143	10.4699	303.434	1.55107		8.00445		0.488006	1.26019	0.155686	5.89925	2.49624
328	111.087	508.21	1.14205	0.120592	4.47408	6.1908	6.92441	0.37233	5.28489	0.760892	2040.36	181.168		2003.15	118.642	1964.98	156.413		1964.98	156.413	1964.98	156.413	1964.98	156.413	-3.83576	12.3823					2040.36	182.119	1964.98	157.079	2003.15	119.327		284.955	12.7183	1859.06	1.3349		7.0055	0.359318	5.16765	11.5445	1.87879	54.8184	19.393
398	173.882	2354.08	0.922953	0.123838	2.00494	6.06378	2.43446	0.35513	1.38087	0.533343	1959.05	45.7228		1985.05	41.5906	2012.25	69.7078		2012.25	69.7078	2012.25	69.7078	2012.25	69.7078	2.64377	4.06662					1959.05	50.7802	2012.25	71.6553	1985.05	43.8599		173.557	15.8626	545.269	2.63047		26.1445	0.0531544	2.33426	2.24726	0.555629	14.0631	4.50681
43	42.6079	997.743	2.27754	0.156673	1.45843	10.4675	2.23996	0.484558	1.70012	0.737778	2547.09	70.1136		2477.04	40.6912	2420.07	48.5068		2420.07	48.5068	2420.07	48.5068	2420.07	48.5068	-5.2486	3.58383					2547.09	76.036	2420.07	50.3157	2477.04	43.3857		131.351	6.64107	303.99	1.69679	0.106228	5.42404	0.0367709	0.775823	1.57077	0.106676	8.8195	2.87894
407	371.554	9365.28	4.96887	0.176876	1.03591	12.1584	1.94917	0.498548	1.65111	0.812267	2607.55	69.4044		2616.71	35.8435	2623.8	33.7661		2623.8	33.7661	2623.8	33.7661	2623.8	33.7661	0.619348	2.93815					2607.55	74.3793	2623.8	37.1248	2616.71	38.2089		266.962	7.91094	606.912	1.86788		8.27914	0.498151	5.12022	5.72346	2.33958	21.3336	7.01831
41	287.246	5957.66	1.03162	0.185099	1.08537	12.3984	2.15804	0.485803	1.86524	0.844238	2552.49	77.0561		2635.06	39.7428	2699.09	35.1273		2699.09	35.1273	2699.09	35.1273	2699.09	35.1273	5.43138	3.10889					2552.49	81.3847	2699.09	37.4602	2635.06	40.9533		293.441	7.12958	1596.07	1.80592		16.4731	0.358509	7.49564	12.7782	4.71499	47.796	13.4762
500	26.1193	899.027	0.597181	0.188045	1.75935	13.4923	2.41862	0.520382	1.65964	0.671324	2700.8	71.7725		2714.75	44.8128	2725.14	56.8016		2725.14	56.8016	2725.14	56.8016	2725.14	56.8016	0.893154	3.3472					2700.8	76.0079	2725.14	57.8866	2714.75	46.6007		88.0924		110.123	0.310025		23.8207	0.0217856	0.422181	0.530979	0.41546	5.6337	1.58299
Rejected Analyses (>10% discordant; >5% reverse discordant; >10% 2σ uncertainty)
325	67.7088	596.465	0.974984	0.06866	2.1449	1.84243	2.85616	0.194619	1.88602	0.644408	1146.35	38.8219		1060.73	36.8443	888.524	86.8606		888.524	86.8606	1146.35	38.8219	1146.35	38.8219	-29.0173	13.3479		x	x		1146.35	40.1624	888.524	88.4655	1060.73	37.7874		240.284	19.4207	957.569	2.81617		50.7755	0.117752	2.83492	6.39932	1.51735	27.4025	9.76522
403	176.32	376.71	1.75347	0.0720527	1.42803	1.89555	1.84262	0.190802	1.16446	0.579413	1125.72	23.5745		1079.53	24.0063	987.427	56.9512		987.427	56.9512	1125.72	23.5745	1125.72	23.5745	-14.0054	6.99543		x	x		1125.72	27.169	987.427	60.0173	1079.53	26.2705		588.158	11.6568	1309.96	9.01519	26.8082	80.834	9.02518	50.7294	15.9176	1.05644	42.3743	11.7934
378	151.457	2160.61	1.05201	0.188257	0.675105	11.5923	1.16411	0.446598	0.948354	0.708916	2380.11	36.9925		2572.05	21.3276	2727	21.7925		2727	21.7925	2727	21.7925	2727	21.7925	12.7204	1.52534	x		x		2380.11	45.3216	2727	26.7994	2572.05	26.0916		270.35	11.8846	1289.26	2.48797		17.6814	0.224298	3.85547	7.82538	2.72261	39.8589	12.2512
335	276.456	6904.63	1.92743	0.0977986	1.4981	3.18515	1.8558	0.236209	1.0953	0.532096	1366.96	26.4431		1453.56	28.1083	1582.56	54.9134		1582.56	54.9134	1582.56	54.9134	1366.96	26.4431	13.6237	3.43147	x		x		1366.96	30.9717	1582.56	57.7312	1453.56	30.7498		217.288	40.7897	1641.95	1.87577		7.08089	0.120932	2.89562	8.69813	0.861333	42.3586	14.9448
38	542.21	2937.07	19.1769	0.0758465	0.773892	1.63801	1.22886	0.156632	0.954559	0.707842	938.031	16.3328		984.947	15.1855	1091.01	30.3848		1091.01	30.3848	938.031	16.3328	938.031	16.3328	14.022	2.82395	x		x		938.031	20.4913	1091.01	34.2429	984.947	18.2168		116.839	5.43999	283.2	0.416901		2.28458	0.2639	4.25843	5.60436	2.8661	18.002	4.30363
34	67.692	608.543	1.94195	0.0915204	1.86545	2.686	2.29681	0.212856	1.33994	0.557114	1244.02	29.7123		1324.61	33.309	1457.47	69.525		1457.47	69.525	1457.47	69.525	1244.02	29.7123	14.6457	4.55345	x		x		1244.02	33.6365	1457.47	71.1223	1324.61	35.3658		255.831	12.6333	596.62	1.26149	0.229542	8.26414	0.0881909	1.2004	4.97825	1.0098	15.1081	5.23293
363	296.334	5255.22	2.00516	0.10018	1.02351	3.29712	2.3789	0.238699	2.14746	0.879632	1379.93	52.2859		1480.37	36.3262	1627.42	37.2995		1627.42	37.2995	1627.42	37.2995	1379.93	52.2859	15.2072	3.75487	x		x		1379.93	54.7221	1627.42	41.2848	1480.37	38.2802		1346.62	8.95541	944.074	2.25607	4.85566	29.6777	2.91391	23.4554	10.9159	2.53834	28.8369	8.6095
501	60.2013	364.772	0.551393	0.0973946	1.9744	3.07432	2.93633	0.228936	2.17343	0.730835	1328.92	51.157		1426.31	44.0946	1574.81	72.446		1574.81	72.446	1574.81	72.446	1328.92	51.157	15.6142	5.06185	x		x		1328.92	52.9294	1574.81	73.5467	1426.31	45.301		207.818	24.6117	606.706	2.08604		32.3161	0.182532	4.97714	12.9078	4.67193	38.9593	12.6448
343	117.533	1090.47	1.48348	0.0946673	1.93383	2.84317	2.56789	0.217822	1.68948	0.630647	1270.36	38.1808		1367.01	37.8072	1521.48	71.4576		1521.48	71.4576	1521.48	71.4576	1270.36	38.1808	16.505	4.65563	x		x		1270.36	41.0652	1521.48	73.6843	1367.01	39.7305		303.39	8.07163	1271.03	0.839958	0.0214478	10.3366	0.0905236	1.55706	5.05929	1.01	27.6768	8.98415
395	123.272	593.742	1.26557	0.100036	1.87166	3.21682	2.05076	0.233223	0.83816	0.342195	1351.37	20.0277		1461.22	31.1346	1624.74	68.2317		1624.74	68.2317	1624.74	68.2317	1351.37	20.0277	16.8255	3.70409	x		x		1351.37	25.6193	1624.74	70.4233	1461.22	33.5407		496.607	19.3843	1508.5	1.91719		11.0608	0.0990626	3.01665	6.99936	2.07293	36.8602	12.4961
496	198.55	3023.77	0.661565	0.0856015	1.60873	2.18577	2.18161	0.185192	1.47357	0.656882	1095.28	29.0924		1176.52	29.7889	1329.2	61.0256		1329.2	61.0256	1095.28	29.0924	1095.28	29.0924	17.5989	4.37067	x		x		1095.28	31.1841	1329.2	62.4174	1176.52	31.1172		245.766	22.2302	1145.8	1.68508	0.329346	56.7189	1.40785	21.6069	24.0128	7.31133	79.0864	21.7857
321	181.541	1336.13	1.77805	0.0819707	1.48788	1.94238	1.88513	0.17186	1.15755	0.574505	1022.35	21.4492		1095.82	24.7664	1244.81	57.1199		1244.81	57.1199	1022.35	21.4492	1022.35	21.4492	17.8714	4.14382	x		x		1022.35	23.3469	1244.81	59.3042	1095.82	26.1894		313.559	27.7397	2212.71	3.45776	3.14021	18.9857	1.10487	10.2852	13.5419	1.85294	63.269	21.5531
468	138.975	530.775	0.868983	0.100604	1.52414	3.18911	2.01883	0.229906	1.32388	0.633466	1334.01	31.2682		1454.52	30.5868	1635.29	55.4872		1635.29	55.4872	1635.29	55.4872	1334.01	31.2682	18.4237	3.36419	x		x		1334.01	34.022	1635.29	56.8931	1454.52	32.1767		514.111	74.1243	957.035	1.96657	431.453	676.07	80.7203	292.765	31.5954	3.91161	52.2804	16.0643
396	147.608	12980.1	1.95602	0.100606	3.72602	3.1865	3.78732	0.229715	0.678651	0.134768	1333	16.0179		1453.89	57.3694	1635.32	135.646		1635.32	135.646	1635.32	135.646	1333	16.0179	18.4868	6.83188	x		x		1333	22.4897	1635.32	136.757	1453.89	58.7046		282.125	16.0473	1800.96	2.38031	8.57782	18.2304	1.7558	10.5549	9.74763	1.07463	51.9901	15.9003
495	174.242	2514.88	1.0535	0.100313	1.30268	3.13839	2.12787	0.226906	1.68252	0.77403	1318.26	39.3159		1442.15	32.1149	1629.91	47.4572		1629.91	47.4572	1629.91	47.4572	1318.26	39.3159	19.1204	3.37108	x		x		1318.26	41.47	1629.91	49.0983	1442.15	33.5256		238.232	123.544	874.677	5.69917	0.314401	23.8865	1.23362	17.5262	23.491	8.51993	67.1279	18.412
385	275.944	1848.55	1.86985	0.0777818	2.79113	1.64707	4.37121	0.153579	3.36408	0.761719	920.995	56.5882		988.427	54.1295	1141.32	108.772		1141.32	108.772	920.995	56.5882	920.995	56.5882	19.3044	9.15031	x		x		920.995	57.6871	1141.32	110.378	988.427	55.0591		491.584	18.9033	2434.23	1.53679	0.952595	18.1623	1.48582	19.5376	27.0732	7.13995	82.8794	28.644
454	118.848	618.857	0.340963	0.105711	1.54481	3.50785	2.85087	0.240669	2.39605	0.831756	1390.17	58.7265		1528.98	44.1505	1726.71	55.5897		1726.71	55.5897	1726.71	55.5897	1390.17	58.7265	19.49	4.27614	x		x		1390.17	60.3173	1726.71	56.958	1528.98	45.26		242.112	11.3351	1677.93	15.4397	0.0477078	136.833	0.842545	15.1793	21.0618	8.55138	84.5858	27.9692
504	122.253	4401.07	0.828659	0.0958775	2.03171	2.78797	2.23672	0.210897	0.935444	0.389706	1233.59	20.5852		1352.32	32.7626	1545.35	74.8387		1545.35	74.8387	1545.35	74.8387	1233.59	20.5852	20.1741	4.08889	x		x		1233.59	24.1079	1545.35	75.9128	1352.32	34.1942		194.151	35.2869	776.254	3.71702	11.8464	36.9394	2.12758	13.5711	8.23048	1.67459	39.287	12.3284
510	147.518	6672.49	0.797406	0.17327	0.719983	9.02832	2.44938	0.377904	2.34118	0.945423	2066.48	81.128		2340.88	43.8856	2589.48	23.5463		2589.48	23.5463	2589.48	23.5463	2589.48	23.5463	20.1969	3.21593	x		x		2066.48	83.1175	2589.48	26.1149	2340.88	44.7835		241.364	26.9324	860.876	9.52419	0.174472	50.2466	1.34247	18.7432	25.2885	7.65176	60.589	19.9671
448	170.677	1512.22	0.724416	0.162013	1.8737	7.92679	2.38754	0.354851	1.47974	0.60297	1957.72	48.9681		2222.73	42.1929	2476.78	61.9616		2476.78	61.9616	2476.78	61.9616	2476.78	61.9616	20.9571	2.79625	x		x		1957.72	52.2466	2476.78	63.0007	2222.73	43.5224		259.662	30.8158	1926.57	9.10445	0.139316	31.463	1.83953	24.6062	37.124	7.9081	117.508	37.5388
376	277.648	1080.32	1.83941	0.0904856	2.1077	2.3831	2.28947	0.191013	0.894009	0.333361	1126.86	18.116		1237.54	32.0958	1435.8	78.7858		1435.8	78.7858	1126.86	18.116	1126.86	18.116	21.517	4.48758	x		x		1126.86	22.6728	1435.8	80.8329	1237.54	34.1528		430.628	15.0172	2049.03	5.03577	0.145181	22.9593	1.61626	19.4605	24.9669	8.31981	76.7259	21.9071
430	258.123	870.696	1.52737	0.0956939	1.5744	2.70742	1.95292	0.205196	1.15549	0.565524	1203.17	24.8573		1330.49	28.3828	1541.75	58.0213		1541.75	58.0213	1541.75	58.0213	1203.17	24.8573	21.9606	3.35033	x		x		1203.17	27.6523	1541.75	59.3865	1330.49	29.9232		290.327	27.1677	1082.71	7.58828	0.154009	26.7597	1.0723	14.8489	18.1189	6.1833	61.5354	20.9562
413	431.12	3049.07	1.46618	0.0989691	1.20214	2.92407	1.69852	0.214283	1.19994	0.652123	1251.59	26.7548		1388.16	25.1889	1604.79	43.9371		1604.79	43.9371	1604.79	43.9371	1251.59	26.7548	22.0089	2.70906	x		x		1251.59	30.6072	1604.79	47.1842	1388.16	27.885		597.483	145.689	2962.19	8.57054	0.469584	170.775	3.63045	40.4761	44.3008	14.4765	113.595	38.438
465	46.6384	917.895	0.856904	0.112926	3.55091	3.88336	3.88818	0.24941	1.58398	0.397709	1435.43	39.9515		1610.23	61.5349	1847.02	125.897		1847.02	125.897	1847.02	125.897	1435.43	39.9515	22.2837	5.7219	x		x		1435.43	42.4722	1847.02	126.49	1610.23	62.4062		176.728	16.8236	1659.33	1.23645		4.82873	0.817461	13.392	20.1974	2.88455	91.6425	31.2777
464	111.311	388.456	0.399125	0.0925414	1.94787	2.43766	2.38135	0.191045	1.3699	0.556999	1127.04	27.7633		1253.79	33.6062	1478.52	72.3918		1478.52	72.3918	1127.04	27.7633	1127.04	27.7633	23.7727	4.17803	x		x		1127.04	30.0559	1478.52	73.5197	1253.79	34.8919		348.798	19.6301	1930.81	3.1331		32.1553	0.846814	14.3441	34.8778	8.01466	130.575	37.5445
384	74.5016	545.709	1.36735	0.11707	6.71961	4.08897	7.31097	0.253319	2.88047	0.388484	1455.57	73.5603		1652.11	116.908	1911.97	236.389		1911.97	236.389	1911.97	236.389	1455.57	73.5603	23.8709	10.1683	x		x		1455.57	75.5655	1911.97	236.995	1652.11	117.634		399.997	65.1839	1721.8	2.03054	34.2147	71.5442	8.26442	50.4347	19.841	1.44144	68.0807	17.1881
470	270.196	78864.7	0.618188	0.0907242	1.5614	2.27789	2.69362	0.182099	2.19491	0.804771	1078.43	42.7215		1205.46	37.253	1440.8	58.3259		1440.8	58.3259	1078.43	42.7215	1078.43	42.7215	25.1504	4.23946	x		x		1078.43	44.0606	1440.8	59.7352	1205.46	38.158		525.155	67.7802	2630.08	6.08068	0.44357	76.3622	5.21962	49.226	61.6704	20.8287	157.762	56.2218
35	53.5392	295.219	0.978589	0.0900306	3.31159	2.2282	3.64397	0.1795	1.52049	0.402666	1064.24	29.2364		1189.95	50.0558	1426.16	123.951		1426.16	123.951	1064.24	29.2364	1064.24	29.2364	25.3771	6.80193	x		x		1064.24	32.2734	1426.16	124.862	1189.95	51.23		622.914	47.9047	1857	2.03153	0.558877	28.7452	0.488679	6.11744	9.69759	3.42364	49.4191	17.3575
506	334.566	1970.1	1.64251	0.0876814	0.931759	2.07684	3.20358	0.171788	3.06508	0.950693	1021.96	56.7755		1141.19	43.0347	1375.51	35.1184		1375.51	35.1184	1021.96	56.7755	1021.96	56.7755	25.7036	4.54259	x		x		1021.96	57.6044	1375.51	37.4538	1141.19	43.4293		583.122	75.4677	2821.46	28.3542	0.308924	119.495	6.02801	68.8824	81.9007	24.8503	175.877	65.4176
383	291.952	2573.46	2.01442	0.104159	1.73602	3.10348	2.62918	0.216097	1.97455	0.728645	1261.22	44.3326		1433.55	39.5734	1699.53	62.6841		1699.53	62.6841	1699.53	62.6841	1261.22	44.3326	25.7901	3.78102	x		x		1261.22	46.7942	1699.53	65.0546	1433.55	41.3988		364.074	27.8671	1171.76	5.47719		32.2687	0.826249	9.13079	13.8956	4.64357	38.2564	11.8003
469	42.8079	252.389	1.55299	0.106613	2.53996	3.22277	2.98601	0.219239	1.56998	0.513064	1277.85	35.6695		1462.65	45.3533	1742.32	91.2207		1742.32	91.2207	1742.32	91.2207	1277.85	35.6695	26.6579	4.35155	x		x		1277.85	37.9614	1742.32	92.0597	1462.65	46.4783		18169.6	12.6347	1132.25	1.09066	239.106	697.073	135.96	837.577	224.419	33.0962	239.154	40.5177
340	264.351	1516.42	1.54277	0.093553	2.52785	2.36435	3.0031	0.183296	1.6213	0.515583	1084.95	31.7318		1231.9	42.0017	1499.11	93.6872		1499.11	93.6872	1084.95	31.7318	1084.95	31.7318	27.6268	4.99378	x		x		1084.95	34.316	1499.11	95.4054	1231.9	43.564		469.623	8.28656	1967.24	3.20876	12.8432	44.4217	4.96144	32.9947	25.4853	1.20738	85.4518	24.3632
355	406.044	3588.03	1.15212	0.0924166	2.18247	2.28224	4.78272	0.179106	4.25573	0.884006	1062.09	81.6783		1206.81	66.1839	1475.96	81.1384		1475.96	81.1384	1062.09	81.6783	1062.09	81.6783	28.0405	6.80244	x		x		1062.09	82.5957	1475.96	83.1279	1206.81	66.9064		797.675	52.7337	3884.7	6.32145	1.99233	111.442	3.99568	38.4602	42.2638	14.9008	141.538	47.8583
349	129.823	349.26	0.650647	0.0980862	3.59463	2.57333	4.00631	0.190277	1.76893	0.424836	1122.88	35.7292		1293.09	57.4186	1588.04	131.669		1588.04	131.669	1122.88	35.7292	1122.88	35.7292	29.2919	6.27951	x		x		1122.88	38.204	1588.04	132.87	1293.09	58.6179		326.23	22.9262	2239.72	1.77442		19.848	0.75551	7.58057	18.599	2.10136	70.8802	23.0747
386	201.017	4663.97	1.61168	0.0985148	7.17956	2.52914	7.71097	0.186196	2.813	0.359467	1100.73	55.7901		1280.45	109.976	1596.2	262.703		1596.2	262.703	1100.73	55.7901	1100.73	55.7901	31.0401	11.8755	x		x		1100.73	57.3449	1596.2	263.292	1280.45	110.625		347.204	15.8762	2100.58	4.33732	0.077761	13.6097	0.346436	4.67484	13.2269	2.47775	57.906	19.514
361	308.445	423.213	1.50125	0.117911	3.06612	3.59699	3.65676	0.22125	1.99269	0.528745	1288.47	45.6134		1548.87	56.944	1924.81	107.699		1924.81	107.699	1924.81	107.699	1288.47	45.6134	33.0595	4.43224	x		x		1288.47	48.0994	1924.81	109.042	1548.87	58.358		288.869	13444.7	2180.76	28.7168	0.01768	13.2447	0.489758	9.96943	16.1211	3.49231	68.3491	21.4067
346	63.9764	624.161	0.975836	0.101594	2.44491	2.61888	3.14353	0.186959	1.97591	0.609507	1104.88	39.3234		1305.95	45.2736	1653.45	88.8003		1653.45	88.8003	1104.88	39.3234	1104.88	39.3234	33.1776	4.30527	x		x		1104.88	41.5271	1653.45	90.5416	1305.95	46.8362		285.432	13.3585	3138.14	4.73665	3.90542	18.7735	2.12861	22.6819	31.5624	5.01804	133.717	37.7199
348	108.218	338.99	1.25328	0.117683	4.30776	3.28043	4.41537	0.202169	0.968836	0.191755	1186.96	20.5861		1476.42	67.3435	1921.33	151.375		1921.33	151.375	1186.96	20.5861	1186.96	20.5861	38.2217	4.98384	x		x		1186.96	25.0075	1921.33	152.337	1476.42	68.4781		166.177	42.4813	1988.81	5.94827	0.42503	8.64296	0.481481	8.88288	16.0658	1.54986	73.3846	22.1151
401	96.1076	1381.34	3.23713	0.114402	5.27776	3.0629	5.58518	0.194178	1.82742	0.316112	1143.97	37.5443		1423.46	83.7954	1870.49	186.591		1870.49	186.591	1143.97	37.5443	1143.97	37.5443	38.8412	6.4226	x		x		1143.97	39.9769	1870.49	187.346	1423.46	84.6575		126.411	86.3031	445.506	3.2218	3.72941	7.12586	0.539056	1.84893	2.36073	0.066306	9.23228	3.40405
368	374.463	24968	2.25084	0.0901469	1.87829	1.75692	3.60189	0.141351	3.07338	0.842642	852.299	48.0917		1029.71	45.6819	1428.64	70.2793		852.299	48.0917	852.299	48.0917	852.299	48.0917	40.3417	4.46596	x		x		852.299	49.2061	1428.64	72.5845	1029.71	46.7999		742.648	56.9694	3238.37	6.50149	0.355528	105.779	9.45882	94.6801	89.3021	24.958	169.219	46.4269
326	18.7837	941.313	0.91189	0.248553	4.53814	10.9443	4.91299	0.319352	1.88222	0.373847	1786.56	57.5644		2518.41	89.5899	3175.57	140.922		3175.57	140.922	3175.57	140.922	3175.57	140.922	43.7403	3.08532	x		x		1786.56	59.5948	3175.57	141.507	2518.41	90.3945		237.528	293.088	1024.25	4.11525	1.74141	12.8566	0.980676	7.03084	8.93052	1.14171	32.3754	10.035
350	64.9092	999.243	1.10325	0.154361	7.27542	4.90225	7.36347	0.230333	1.13529	0.140021	1336.25	26.8543		1802.64	121.716	2394.8	242.606		2394.8	242.606	2394.8	242.606	1336.25	26.8543	44.2022	5.76277	x		x		1336.25	31.1643	2394.8	243.148	1802.64	122.394		25984.9	6.37765	1695.88	1.01447	632.536	1261.44	197.143	1072.8	248.779	31.6328	252.762	39.5862
319	559.878	920.837	1.21299	0.0978053	2.94995	1.75165	3.44546	0.129892	1.78018	0.50253	787.251	25.8573		1027.77	43.6503	1582.7	108.129		787.251	25.8573	787.251	25.8573	787.251	25.8573	50.259	3.7706	x		x		787.251	26.8401	1582.7	109.202	1027.77	44.4694		1508.99	99.1362	6925.6	6.3305	0.955649	191.736	10.2537	110.645	133.979	43.9535	317.771	107.765
J1119, Tindir Gp, Tatonduk inlier (Ediacaran), University of Arizona, n=96/114
13	143.302	5040.75	2.18459	0.0625901	0.526364	0.948297	1.30291	0.109885	1.19185	0.914762	672.078	14.9092		677.215	12.621	694.341	21.989		672.078	14.9092	672.078	14.9092	672.078	14.9092	3.20632	3.7426
28	152.794	5098.1	0.930691	0.0615789	0.61194	0.939965	2.15937	0.110708	2.07085	0.959005	676.858	26.0796		672.864	20.8232	659.494	25.7022		676.858	26.0796	676.858	26.0796	676.858	26.0796	-2.63287	5.62468
40	117.289	4970.37	0.905339	0.0639266	0.70561	1.11245	5.24797	0.126212	5.20032	0.99092	766.217	73.6356		759.354	55.0152	739.183	29.2627		766.217	73.6356	766.217	73.6356	766.217	73.6356	-3.65727	10.7739
3	315.848	7148.33	2.36413	0.0684915	2.10722	1.38934	2.28723	0.147119	0.889431	0.388867	884.796	14.4128		884.415	26.4699	883.483	85.4363		884.796	14.4128	884.796	14.4128	884.796	14.4128	-0.148617	9.82121
1	665.684	199231	11.2796	0.0688306	0.508114	1.43021	0.946389	0.150701	0.798419	0.843648	904.894	13.2117		901.638	11.0845	893.665	20.5207		893.665	20.5207	904.894	13.2117	904.894	13.2117	-1.25648	2.7553
61	322.869	14192.8	2.04115	0.068783	0.684056	1.46937	2.69289	0.154934	2.60456	0.967198	928.563	44.147		917.867	31.8924	892.236	27.684		892.236	27.684	928.563	44.147	928.563	44.147	-4.07148	5.90836
11	138.295	7930.86	0.959412	0.0740152	0.714512	1.72812	1.97493	0.169337	1.84115	0.932259	1008.46	33.6881		1019.05	24.8984	1041.86	28.2968		1041.86	28.2968	1008.46	33.6881	1008.46	33.6881	3.20637	4.16728
22	169.7	7598.55	3.85568	0.0738695	0.852321	1.75742	1.84932	0.172547	1.6412	0.887461	1026.13	30.515		1029.9	23.458	1037.89	33.7696		1037.89	33.7696	1026.13	30.515	1026.13	30.515	1.13257	4.35802
1	137.505	5487.58	1.71473	0.0776	1.7121	1.84865	3.85734	0.172779	3.45656	0.896098	1027.4	64.3422		1062.95	49.8287	1136.67	66.7762		1136.67	66.7762	1027.4	64.3422	1027.4	64.3422	9.6129	7.76132
78	300.322	11990	7.08633	0.0767483	0.503728	1.83039	3.90161	0.172971	3.86895	0.991631	1028.46	72.0872		1056.42	50.2249	1114.64	19.6906		1114.64	19.6906	1028.46	72.0872	1028.46	72.0872	7.73151	6.66956
14	120.538	7627.02	2.07201	0.074476	0.942024	1.77725	1.76955	0.173074	1.49797	0.846523	1029.03	27.9244		1037.18	22.5373	1054.41	37.2276		1054.41	37.2276	1029.03	27.9244	1029.03	27.9244	2.40774	4.34582
58	190.587	9365.65	1.30677	0.0767657	0.913325	1.85861	4.3442	0.175598	4.24711	0.97765	1042.88	80.1558		1066.49	56.227	1115.09	35.7188		1115.09	35.7188	1042.88	80.1558	1042.88	80.1558	6.47556	7.78755
37	315.731	15452.9	2.45485	0.0753119	0.982679	1.84391	2.74655	0.177572	2.56474	0.933803	1053.7	48.866		1061.26	35.4441	1076.86	38.6555		1076.86	38.6555	1053.7	48.866	1053.7	48.866	2.15046	5.73842
8	239.487	157678	2.10467	0.0768298	1.16	1.93623	1.37147	0.182779	0.731657	0.533485	1082.14	14.2858		1093.7	17.9991	1116.79	45.3353		1116.79	45.3353	1082.14	14.2858	1082.14	14.2858	3.10292	4.13623
60	392.501	21869.9	3.02551	0.0757389	0.521613	1.92107	2.48387	0.18396	2.42848	0.977701	1088.57	47.6758		1088.44	32.5128	1088.16	20.501		1088.16	20.501	1088.57	47.6758	1088.57	47.6758	-0.0378644	4.7695
5	190.496	10228.4	2.75836	0.0768842	0.714691	1.98098	2.2116	0.186871	2.09294	0.946346	1104.4	41.6363		1109.06	29.2513	1118.21	27.9608		1118.21	27.9608	1104.4	41.6363	1104.4	41.6363	1.23454	4.46804
16	496.513	23201.7	24.5244	0.0769684	1.19681	2.00634	1.7214	0.189056	1.23728	0.718766	1116.26	24.8561		1117.66	22.8641	1120.39	46.7493		1120.39	46.7493	1116.26	24.8561	1116.26	24.8561	0.368538	4.71214
46	39.5917	2471.96	1.26854	0.0772534	1.18123	2.03966	2.71528	0.191487	2.44488	0.900416	1129.42	49.646		1128.85	36.2645	1127.72	46.1153		1127.72	46.1153	1129.42	49.646	1129.42	49.646	-0.150982	6.01273
7	94.7958	5001.05	2.48037	0.0775714	0.884716	2.06869	1.08258	0.193416	0.623912	0.576317	1139.85	12.7761		1138.5	14.5244	1135.9	34.4703		1135.9	34.4703	1139.85	12.7761	1139.85	12.7761	-0.3479	3.24626
68	243.945	15327.3	2.49374	0.0772803	0.519701	2.10229	4.43544	0.197298	4.40489	0.993112	1160.79	91.7142		1149.56	59.8362	1128.45	20.2901		1128.45	20.2901	1160.79	91.7142	1160.79	91.7142	-2.86552	8.33524
52	183.532	10992.6	2.57141	0.0787263	0.918279	2.14589	2.34058	0.19769	2.15292	0.919824	1162.9	44.8998		1163.73	31.7767	1165.24	35.6926		1165.24	35.6926	1162.9	44.8998	1162.9	44.8998	0.201136	4.91858
23	247.487	8335.5	4.3781	0.0824318	1.70058	2.25655	2.70053	0.19854	2.09782	0.776819	1167.47	43.9077		1198.83	37.2454	1255.81	65.1877		1255.81	65.1877	1167.47	43.9077	1167.47	43.9077	7.03435	5.95921
35	181.264	8602.57	1.85058	0.0849457	0.545486	2.40747	1.59815	0.20555	1.50217	0.939945	1205.07	32.3613		1244.83	22.4724	1314.28	20.7365		1314.28	20.7365	1314.28	20.7365	1205.07	32.3613	8.30991	2.85582
70	76.8528	5057.58	2.2915	0.0823514	0.825917	2.37655	1.83032	0.209303	1.63338	0.892402	1225.1	35.7192		1235.57	25.6396	1253.87	31.6335		1253.87	31.6335	1253.87	31.6335	1225.1	35.7192	2.29436	3.76714
45	153.866	8051.94	2.56123	0.0849371	0.719703	2.45267	1.27071	0.20943	1.04725	0.824146	1225.78	22.9132		1258.21	17.9651	1314.09	27.3573		1314.09	27.3573	1314.09	27.3573	1225.78	22.9132	6.71975	2.60989
26	205.87	12696.9	2.94706	0.0832506	0.918746	2.43246	1.79824	0.211912	1.54582	0.859631	1239	34.1523		1252.25	25.3628	1275.08	35.0855		1275.08	35.0855	1275.08	35.0855	1239	34.1523	2.82975	3.78459
14	89.6907	124462	1.57568	0.0828384	1.95977	2.43363	2.11226	0.21307	0.788009	0.373064	1245.15	17.4881		1252.6	29.7966	1265.39	75.0215		1265.39	75.0215	1265.39	75.0215	1245.15	17.4881	1.59953	5.99535
11	211.489	142142	2.48801	0.0822294	1.2743	2.41893	1.6548	0.213351	1.05571	0.637967	1246.64	23.4545		1248.24	23.3016	1251	48.8799		1251	48.8799	1251	48.8799	1246.64	23.4545	0.348439	4.32152
47	170.477	12246.4	3.06065	0.0821244	0.983684	2.42925	2.453	0.214535	2.24712	0.916072	1252.93	50.1523		1251.3	34.5859	1248.48	37.7814		1248.48	37.7814	1248.48	37.7814	1252.93	50.1523	-0.35695	5.0359
50	49.6374	3268.64	3.16001	0.0827947	0.991803	2.45882	2.74959	0.215389	2.56448	0.932678	1257.46	57.4228		1260.02	38.9052	1264.38	37.97		1264.38	37.97	1264.38	37.97	1257.46	57.4228	0.547403	5.43559
74	141.365	10232	3.19796	0.0831306	0.596593	2.47216	4.93337	0.215682	4.89716	0.992661	1259.02	109.78		1263.92	69.9334	1272.28	22.8116		1272.28	22.8116	1272.28	22.8116	1259.02	109.78	1.04263	8.80911
48	388.035	26974.3	2.00442	0.0824257	0.782914	2.45571	2.46122	0.216079	2.33338	0.948057	1261.12	52.3858		1259.1	34.8113	1255.67	29.997		1255.67	29.997	1255.67	29.997	1261.12	52.3858	-0.434416	4.81266
33B	257.618	8902.25	2.06744	0.0903995	2.58511	2.70617	3.22033	0.217114	1.92034	0.596319	1266.61	43.2824		1330.15	46.8055	1433.97	96.6715		1433.97	96.6715	1433.97	96.6715	1266.61	43.2824	11.671	6.67604
63	217.177	15499.5	1.00096	0.0857351	0.861309	2.61883	2.86338	0.221537	2.73076	0.953687	1289.99	62.5752		1305.94	41.2445	1332.2	32.6609		1332.2	32.6609	1332.2	32.6609	1289.99	62.5752	3.16825	5.26296
34	72.342	5106.23	2.19938	0.0863214	1.03093	2.66256	2.46795	0.223707	2.24231	0.908573	1301.43	51.7934		1318.13	35.7095	1345.37	39.0194		1345.37	39.0194	1345.37	39.0194	1301.43	51.7934	3.26618	4.76357
49	69.5727	5093.73	2.05198	0.0857276	0.529098	2.71489	2.65171	0.229684	2.59839	0.979892	1332.84	61.3223		1332.54	38.5721	1332.03	20.0614		1332.03	20.0614	1332.03	20.0614	1332.84	61.3223	-0.0608028	4.84405
8	60.4743	3870.25	2.43363	0.0860153	0.658139	2.73209	1.7856	0.230365	1.65988	0.929595	1336.41	39.2677		1337.23	26.0158	1338.51	24.9346		1338.51	24.9346	1338.51	24.9346	1336.41	39.2677	0.156502	3.47361
15	152.562	10428	2.00367	0.087999	0.838715	2.80611	1.8375	0.231273	1.63492	0.889753	1341.17	38.801		1357.17	26.9627	1382.45	31.5828		1382.45	31.5828	1382.45	31.5828	1341.17	38.801	2.98596	3.57627
3	120.542	8149.64	2.852	0.0862217	0.643247	2.75408	2.321	0.231664	2.23008	0.960829	1343.21	52.9984		1343.19	33.8903	1343.14	24.3526		1343.14	24.3526	1343.14	24.3526	1343.21	52.9984	-0.00561196	4.34254
35	21.7861	1307.3	1.74311	0.0825536	1.4491	2.66433	2.57908	0.234072	2.13349	0.827229	1355.81	51.1301		1318.62	37.3246	1258.7	55.4864		1258.7	55.4864	1258.7	55.4864	1355.81	51.1301	-7.71479	6.2488
27	85.1027	3824.79	1.08861	0.0948936	2.7003	3.08451	3.245	0.235748	1.79956	0.554564	1364.55	43.3772		1428.85	48.7792	1525.94	99.7385		1525.94	99.7385	1525.94	99.7385	1364.55	43.3772	10.5764	6.49949
24	139.791	9916.08	3.28004	0.0882603	0.877088	2.87039	1.9409	0.235871	1.73142	0.89207	1365.2	41.7523		1374.17	28.6488	1388.14	32.9992		1388.14	32.9992	1388.14	32.9992	1365.2	41.7523	1.6527	3.80956
42	95.1245	7386.02	1.63198	0.0869967	0.821702	2.8312	2.79894	0.236029	2.6756	0.955936	1366.02	64.556		1363.84	41.1696	1360.4	31.0353		1360.4	31.0353	1360.4	31.0353	1366.02	64.556	-0.412855	5.26933
79	165.613	13512.9	0.859334	0.0882114	0.652248	2.8824	3.16853	0.236989	3.10067	0.978583	1371.02	75.058		1377.32	46.825	1387.08	24.5433		1387.08	24.5433	1387.08	24.5433	1371.02	75.058	1.15736	5.68685
76	68.4865	5288.05	2.00269	0.0867321	0.687834	2.84261	0.919455	0.237704	0.610149	0.663599	1374.75	14.8057		1366.86	13.5367	1354.53	26.003		1354.53	26.003	1354.53	26.003	1374.75	14.8057	-1.49257	2.23402
80	187.945	14286.2	1.45164	0.0882684	0.920747	2.905	3.13833	0.238693	3.00022	0.955994	1379.9	73.0481		1383.21	46.4717	1388.31	34.6411		1388.31	34.6411	1388.31	34.6411	1379.9	73.0481	0.606113	5.81684
43	121.678	9217.2	2.06433	0.0873403	0.50366	2.89527	2.47279	0.240421	2.42095	0.979037	1388.89	59.288		1380.68	36.5824	1368	19.0042		1368	19.0042	1368	19.0042	1388.89	59.288	-1.52704	4.55765
29	155.774	10369.9	1.86037	0.091645	0.87666	3.04541	1.3071	0.24101	0.969522	0.741736	1391.95	23.7899		1419.08	19.5835	1460.02	32.6634		1460.02	32.6634	1460.02	32.6634	1391.95	23.7899	4.66282	2.68405
73	94.803	8528.75	2.74477	0.0909584	0.880742	3.04448	1.68476	0.242755	1.43621	0.852474	1401.01	35.4469		1418.85	25.2405	1445.71	32.8788		1445.71	32.8788	1445.71	32.8788	1401.01	35.4469	3.0925	3.29678
28	70.4389	5002.49	2.1307	0.0923127	0.698086	3.09524	1.39729	0.243182	1.21041	0.866256	1403.22	29.9161		1431.51	21.0186	1473.81	25.9616		1473.81	25.9616	1473.81	25.9616	1403.22	29.9161	4.78966	2.63309
54	172.078	14205.1	2.69021	0.087778	0.702822	2.95061	3.37003	0.243795	3.29593	0.978012	1406.4	81.6271		1395	50.1025	1377.61	26.4834		1377.61	26.4834	1377.61	26.4834	1406.4	81.6271	-2.08951	6.24183
75	122.207	9461.18	2.44611	0.0883748	0.883879	2.97501	2.07726	0.244151	1.87984	0.904958	1408.24	46.6103		1401.26	30.943	1390.63	33.2435		1390.63	33.2435	1390.63	33.2435	1408.24	46.6103	-1.26682	4.13457
57	242.661	16960.4	3.05476	0.0898927	0.86648	3.0763	1.49853	0.248201	1.22262	0.815881	1429.19	30.7175		1426.81	22.5078	1423.23	32.4449		1423.23	32.4449	1423.23	32.4449	1429.19	30.7175	-0.418545	3.14622
9	157.685	11030	2.08808	0.0940114	0.843138	3.24143	1.54113	0.250066	1.29003	0.837072	1438.81	32.606		1467.13	23.4406	1508.33	31.2089		1508.33	31.2089	1508.33	31.2089	1438.81	32.606	4.60867	2.92724
2	185.573	12859.6	1.60496	0.0919955	0.996095	3.17399	2.01139	0.250229	1.74743	0.868764	1439.66	44.1899		1450.85	30.4419	1467.28	37.0774		1467.28	37.0774	1467.28	37.0774	1439.66	44.1899	1.88222	3.90099
16	60.4289	4966.75	2.06346	0.0915865	0.541278	3.17251	2.42563	0.251229	2.36446	0.974784	1444.81	59.9851		1450.49	36.7083	1458.81	20.1705		1458.81	20.1705	1458.81	20.1705	1444.81	59.9851	0.959462	4.33395
38	79.034	6808.67	2.03073	0.0910217	0.925893	3.18596	2.43205	0.25386	2.24891	0.924697	1458.35	57.5301		1453.76	36.8429	1447.04	34.5582		1447.04	34.5582	1447.04	34.5582	1458.35	57.5301	-0.781792	4.64751
55	209.416	17508.7	2.61081	0.0911344	0.606718	3.19704	3.36722	0.254428	3.3121	0.983633	1461.27	84.8797		1456.44	51.0572	1449.39	22.6378		1449.39	22.6378	1449.39	22.6378	1461.27	84.8797	-0.819369	6.06423
78B	119.163	10975	1.637	0.093761	0.579762	3.28962	2.76731	0.254462	2.7059	0.977808	1461.44	69.3513		1478.6	42.2411	1503.29	21.4762		1503.29	21.4762	1503.29	21.4762	1461.44	69.3513	2.78351	4.81783
53	296.123	24420.9	1.08227	0.0911062	0.543238	3.20536	2.20284	0.255169	2.1348	0.969115	1465.08	54.8352		1458.45	33.4181	1448.81	20.2708		1448.81	20.2708	1448.81	20.2708	1465.08	54.8352	-1.12305	4.04066
4	102.922	116015	1.18241	0.0919867	1.4251	3.27926	3.21835	0.258553	2.88563	0.896618	1482.43	74.9027		1476.14	49.0924	1467.09	53.0488		1467.09	53.0488	1467.09	53.0488	1482.43	74.9027	-1.04554	6.27821
24	68.5308	4912.24	1.94791	0.0936586	0.714044	3.33906	1.92956	0.258568	1.79258	0.929009	1482.51	46.5321		1490.23	29.5532	1501.22	26.4579		1501.22	26.4579	1501.22	26.4579	1482.51	46.5321	1.24636	3.55482
62	176.246	14518.3	2.57549	0.0930751	0.93944	3.35233	2.4428	0.261223	2.25494	0.923094	1496.1	59.0109		1493.34	37.4499	1489.4	34.8649		1489.4	34.8649	1489.4	34.8649	1496.1	59.0109	-0.449779	4.60728
20	160.471	80514.7	3.08878	0.0943047	1.40479	3.46144	1.581	0.266208	0.725334	0.458782	1521.53	19.2677		1518.48	24.413	1514.21	51.9617		1514.21	51.9617	1514.21	51.9617	1514.21	51.9617	-0.483363	3.67549
69	111.625	9745.24	1.69529	0.100211	0.820689	3.92099	3.60285	0.283777	3.50813	0.973711	1610.36	97.9822		1618.02	57.1472	1627.99	29.9053		1627.99	29.9053	1627.99	29.9053	1627.99	29.9053	1.08306	6.28691
18	38.4959	3157.71	0.458623	0.100576	0.559988	3.89243	2.79324	0.280688	2.73653	0.979698	1594.83	75.7812		1612.11	44.2346	1634.74	20.3899		1634.74	20.3899	1634.74	20.3899	1634.74	20.3899	2.44168	4.79271
30	93.3309	8146.99	2.11642	0.100988	0.50658	4.15676	1.68726	0.298528	1.60942	0.953864	1684	46.7497		1665.54	27.0691	1642.33	18.4272		1642.33	18.4272	1642.33	18.4272	1642.33	18.4272	-2.53744	3.07025
20	93.3605	9781.34	3.30306	0.102038	0.618215	4.14778	2.42346	0.294818	2.34328	0.966916	1665.56	67.4137		1663.77	38.8663	1661.5	22.4296		1661.5	22.4296	1661.5	22.4296	1661.5	22.4296	-0.244233	4.27712
10	42.9911	3774.76	1.54226	0.102121	0.576137	4.13097	1.62703	0.293382	1.5216	0.935206	1658.41	43.6099		1660.45	26.071	1663.01	20.8987		1663.01	20.8987	1663.01	20.8987	1663.01	20.8987	0.276916	2.9064
18	88.6646	56367.5	1.16876	0.102744	1.53105	4.20413	1.83237	0.296768	1.00672	0.549406	1675.26	29.1097		1674.83	29.4618	1674.26	55.4657		1674.26	55.4657	1674.26	55.4657	1674.26	55.4657	-0.0598914	3.74313
34	210.985	17762.5	4.52653	0.10313	0.717029	4.14896	3.08758	0.291779	3.00317	0.972661	1650.41	85.7092		1664	49.5238	1681.18	25.9536		1681.18	25.9536	1681.18	25.9536	1681.18	25.9536	1.82986	5.31865
56	54.6724	4549.96	1.60221	0.103393	1.09544	4.1848	2.63492	0.293551	2.39642	0.909484	1659.25	68.7134		1671.05	42.3313	1685.88	39.624		1685.88	39.624	1685.88	39.624	1685.88	39.624	1.57978	4.68649
36	316.595	27985.5	1.8441	0.105395	0.671692	4.39337	2.31592	0.302327	2.21638	0.957017	1702.84	65.0098		1711.09	37.549	1721.19	24.19		1721.19	24.19	1721.19	24.19	1721.19	24.19	1.06629	4.02482
44	204.018	18533.5	1.31455	0.106598	0.570894	4.55023	1.33968	0.309588	1.21196	0.904657	1738.68	36.2003		1740.2	21.8589	1742.02	20.5028		1742.02	20.5028	1742.02	20.5028	1742.02	20.5028	0.191476	2.38711
12	294.561	13851.2	2.87338	0.108385	2.13741	4.64315	2.31973	0.310701	0.901449	0.388601	1744.15	26.9994		1757.06	37.9898	1772.43	76.4865		1772.43	76.4865	1772.43	76.4865	1772.43	76.4865	1.59538	4.51145
65	301.947	26526.5	4.68936	0.109655	0.885944	5.133	3.5127	0.339503	3.39914	0.967672	1884.28	108.856		1841.58	58.5263	1793.66	31.6165		1793.66	31.6165	1793.66	31.6165	1793.66	31.6165	-5.05194	6.34516
12	126.629	12870.2	5.45483	0.10968	0.922461	4.97121	3.13951	0.328724	3.00093	0.95586	1832.2	93.8069		1814.44	52.0291	1794.09	32.9182		1794.09	32.9182	1794.09	32.9182	1794.09	32.9182	-2.12396	5.55428
33	86.0751	7939.18	1.36648	0.113942	0.519195	5.28642	1.88297	0.336492	1.80998	0.961234	1869.77	57.5783		1866.67	31.5155	1863.2	18.3703		1863.2	18.3703	1863.2	18.3703	1863.2	18.3703	-0.352492	3.24481
67	506.041	51412	2.20214	0.113986	0.833521	5.26188	3.16088	0.334803	3.049	0.964605	1861.62	96.6301		1862.7	52.8728	1863.89	29.4919		1863.89	29.4919	1863.89	29.4919	1863.89	29.4919	0.12167	5.41985
21	29.195	2874.7	0.682176	0.114013	0.608422	5.15547	1.37626	0.327953	1.23446	0.896973	1828.45	38.5197		1845.3	22.9409	1864.33	21.5251		1864.33	21.5251	1864.33	21.5251	1864.33	21.5251	1.92448	2.35609
64	67.806	7422.2	1.5118	0.114148	0.570673	5.19156	1.72332	0.32986	1.62609	0.943579	1837.7	50.9618		1851.23	28.7594	1866.45	20.1879		1866.45	20.1879	1866.45	20.1879	1866.45	20.1879	1.54036	2.93075
39	251.752	25586.9	1.72726	0.114214	0.782274	5.33429	1.93706	0.338731	1.77208	0.914827	1880.56	56.6528		1874.37	32.4673	1867.5	27.6663		1867.5	27.6663	1867.5	27.6663	1867.5	27.6663	-0.699416	3.38058
26	243.886	28077.7	1.9279	0.114413	0.634656	5.64092	5.01294	0.35758	4.9726	0.991953	1970.69	165.497		1922.37	84.7935	1870.64	22.44		1870.64	22.44	1870.64	22.44	1870.64	22.44	-5.34872	8.9369
13	100.373	276085	2.17908	0.114475	0.784286	5.47025	1.95887	0.346572	1.79502	0.916351	1918.21	58.3727		1895.94	32.9624	1871.63	27.7274		1871.63	27.7274	1871.63	27.7274	1871.63	27.7274	-2.489	3.46878
33	247.376	23041.4	1.08917	0.114846	0.955371	5.17463	1.46069	0.326784	1.10494	0.756448	1822.77	34.3853		1848.45	24.3632	1877.46	33.7486		1877.46	33.7486	1877.46	33.7486	1877.46	33.7486	2.91272	2.52984
71	99.7852	8726.77	1.49501	0.115317	0.924684	4.90213	5.05352	0.308312	4.9682	0.983117	1732.39	147.935		1802.62	83.5817	1884.83	32.6356		1884.83	32.6356	1884.83	32.6356	1884.83	32.6356	8.0875	8.00846
6	145.332	38853.7	1.08844	0.115598	1.11077	5.3768	1.25504	0.337343	0.584228	0.465505	1873.87	18.6203		1881.17	21.0611	1889.21	39.1837		1889.21	39.1837	1889.21	39.1837	1889.21	39.1837	0.811963	2.28115
22	216.409	12599.9	2.52098	0.118852	3.35127	5.37865	3.75883	0.328219	1.70228	0.452876	1829.74	53.1499		1881.46	63.0998	1939.02	117.553		1939.02	117.553	1939.02	117.553	1939.02	117.553	5.63583	6.34358
6	362.225	28256.2	0.936326	0.124603	0.935991	6.18581	1.89277	0.360053	1.64514	0.869172	1982.42	55.0289		2002.45	32.4297	2023.15	32.5018		2023.15	32.5018	2023.15	32.5018	2023.15	32.5018	2.01297	3.14264
21	189.259	5076.15	1.56182	0.12693	4.91681	5.95169	4.92698	0.340074	0.316354	0.0642085	1887.03	10.1436		1968.81	83.9991	2055.87	170.205		2055.87	170.205	2055.87	170.205	2055.87	170.205	8.2128	7.61504
31	98.6214	5595.62	0.99886	0.134321	1.07195	6.40459	2.0703	0.345818	1.77117	0.855516	1914.6	57.5042		2032.9	35.6414	2155.19	36.6727		2155.19	36.6727	2155.19	36.6727	2155.19	36.6727	11.1635	3.06662
17	93.7353	14038.3	1.03103	0.174089	0.795051	11.8758	2.78496	0.494754	2.66906	0.958384	2591.21	111.626		2594.66	51.1315	2597.33	25.9795		2597.33	25.9795	2597.33	25.9795	2597.33	25.9795	0.235531	4.41203
27	70.9351	13425.4	0.980691	0.183208	0.652941	12.938	1.27993	0.512181	1.10086	0.860092	2665.93	47.1114		2675.15	23.6461	2682.11	21.1622		2682.11	21.1622	2682.11	21.1622	2682.11	21.1622	0.60332	1.92363
32	50.7714	8165.87	1.45342	0.186163	0.671651	14.1188	1.89417	0.550051	1.7711	0.935023	2825.39	79.4107		2757.72	35.2072	2708.54	21.7217		2708.54	21.7217	2708.54	21.7217	2708.54	21.7217	-4.31399	3.04888
17	65.4537	53394.6	2.37947	0.188471	0.816097	13.8144	1.47734	0.531604	1.23147	0.833573	2748.2	54.0061		2737.07	27.4184	2728.85	26.3366		2728.85	26.3366	2728.85	26.3366	2728.85	26.3366	-0.70914	2.20487
25	48.1217	8972.94	1.66439	0.191205	0.747468	14.1998	2.03687	0.538621	1.89476	0.930233	2777.67	83.8083		2763.15	37.8744	2752.54	24.0756		2752.54	24.0756	2752.54	24.0756	2752.54	24.0756	-0.913084	3.17012
Rejected Analyses (>10% discordant; >5% reverse discordant; >10% 2σ uncertainty)
4	75.1776	2331.8	2.12401	0.0641113	2.44583	0.985553	2.71681	0.111492	1.18279	0.43536	681.407	14.9906		696.449	26.8393	745.285	101.308	x	681.407	14.9906	681.407	14.9906	681.407	14.9906	8.57091	12.5899			x
10	52.0056	27990.2	0.989904	0.0780176	3.75918	2.0202	3.98609	0.187802	1.32569	0.332579	1109.46	26.4834		1122.33	53.0756	1147.34	146.384	x	1147.34	146.384	1109.46	26.4834	1109.46	26.4834	3.30168	12.5514			x
5	46.4725	14293.1	2.56898	0.0873536	4.85061	2.68583	5.14642	0.222996	1.71964	0.334143	1297.68	39.6173		1324.56	74.6686	1368.29	183.111	x	1368.29	183.111	1368.29	183.111	1297.68	39.6173	5.16014	13.018			x
59	84.445	4413.46	1.63369	0.0880101	4.78234	2.67924	5.12766	0.22079	1.84991	0.36077	1286.05	42.273		1322.75	74.3465	1382.69	180.173	x	1382.69	180.173	1382.69	180.173	1286.05	42.273	6.98938	12.4995			x
29	135.306	6696.14	2.04013	0.0962528	4.87386	3.33402	4.98706	0.25122	1.05652	0.211853	1444.76	26.8025		1489.06	76.3872	1552.69	179.463	x	1552.69	179.463	1552.69	179.463	1444.76	26.8025	6.95111	10.8924			x
15	15.899	9256.68	0.597136	0.111232	6.47077	5.0852	7.37415	0.331573	3.53654	0.479587	1846	111.27		1833.64	122.795	1819.62	230.436	x	1819.62	230.436	1819.62	230.436	1819.62	230.436	-1.44982	14.2286			x
9	7.82456	2842.18	2.29916	0.0396824	75.1743	1.01296	75.7418	0.185136	9.25441	0.122184	1094.97	182.674	x	710.367	798.848	-371.56	4485.44		-371.56	4485.44	1094.97	182.674	1094.97	182.674	394.696	3557.88			x
19	241.721	507.737	1.84114	0.0909299	9.6677	2.7959	10.6573	0.223005	4.48472	0.420814	1297.73	103.325		1354.44	156.543	1445.12	361.728	x	1445.12	361.728	1445.12	361.728	1297.73	103.325	10.1988	23.5879			x
66	137.391	4525.96	2.77895	0.102926	4.95629	3.68974	6.12595	0.259998	3.60035	0.58772	1489.83	93.87		1569.15	95.9939	1677.53	179.577	x	1677.53	179.577	1677.53	179.577	1489.83	93.87	11.1888	11.0317			x
19	312.4	3920.76	2.37995	0.107924	0.824482	3.82449	2.20675	0.257012	2.04694	0.927582	1474.54	52.8806		1597.91	34.8181	1764.65	29.5319		1764.65	29.5319	1764.65	29.5319	1474.54	52.8806	16.4404	3.30688	x		x
25	169.502	3172.63	2.34466	0.0914276	3.04647	2.34217	3.22663	0.185798	1.06309	0.329474	1098.57	21.0462		1225.18	45.009	1455.51	113.601		1455.51	113.601	1098.57	21.0462	1098.57	21.0462	24.5232	6.06575	x		x
2	178.959	151.746	1.59277	0.094181	7.29484	2.49274	8.13481	0.191961	3.60006	0.44255	1131.99	73.2554		1269.93	115.673	1511.73	270.268	x	1511.73	270.268	1131.99	73.2554	1131.99	73.2554	25.1196	14.2372	x		x
23	138.475	2109.8	0.910052	0.129886	9.92155	4.55383	10.3013	0.25428	2.77121	0.269015	1460.51	70.9849		1740.86	168.499	2096.41	342.551	x	2096.41	342.551	2096.41	342.551	1460.51	70.9849	30.3326	11.8765	x		x
72	380.667	2640.35	0.76763	0.128338	4.26242	4.20035	5.38266	0.237372	3.28707	0.610677	1373.02	79.6741		1674.09	86.5784	2075.31	147.2		2075.31	147.2	2075.31	147.2	1373.02	79.6741	33.8403	6.063	x		x
51	308.826	1991.59	2.95922	0.114117	7.51682	3.21356	8.66153	0.204238	4.30344	0.496845	1198.05	92.2192		1460.43	131.659	1865.96	266.285	x	1865.96	266.285	1198.05	92.2192	1198.05	92.2192	35.7948	10.4104	x		x
7	214.572	210.879	1.49046	0.0792633	5.55174	1.26596	5.5813	0.115837	0.57364	0.102779	706.558	7.52421		830.583	62.0769	1178.74	215.3	x	706.558	7.52421	706.558	7.52421	706.558	7.52421	40.058	10.9672	x		x
30	591.026	3014.01	3.77353	0.104279	2.26381	2.40187	3.45659	0.167052	2.61212	0.755694	995.847	47.2423		1243.16	48.5793	1701.62	81.7281		1701.62	81.7281	995.847	47.2423	995.847	47.2423	41.4766	3.95079	x		x
41	157.528	1643.25	1.09224	0.114924	3.48428	2.91003	3.72866	0.183647	1.32766	0.35607	1086.87	26.0271		1384.52	55.2418	1878.68	123.099		1878.68	123.099	1086.87	26.0271	1086.87	26.0271	42.1473	4.03598	x		x
S1601, Map Unit Pu, White Uplift (Ediacaran), University of Arizona, n=282/315
54	153.446	15820.7	8.59517	0.0587937	1.19778	0.75614	1.63808	0.0933166	1.11742	0.682153	575.122	12.0504		571.781	14.0369	558.538	51.2007		575.122	12.0504	575.122	12.0504	575.122	12.0504	-2.96914	9.68252
203	50.5265	4857.83	0.93711	0.0711002	2.36314	1.55253	2.58238	0.158437	1.04129	0.403229	948.084	17.9941		951.499	31.2616	959.424	94.662		959.424	94.662	948.084	17.9941	948.084	17.9941	1.18195	9.92868
44	27.5885	6565.57	1.28258	0.0708916	1.5274	1.58081	1.96687	0.161797	1.2392	0.630036	966.758	21.805		962.686	23.9776	953.379	61.2353		953.379	61.2353	966.758	21.805	966.758	21.805	-1.40329	6.903
254	29.1962	15375.3	0.785202	0.074648	1.2821	1.74204	1.91535	0.169328	1.42295	0.742919	1008.41	26.0349		1024.22	24.2181	1058.18	50.6085		1058.18	50.6085	1008.41	26.0349	1008.41	26.0349	4.70388	5.17931
223	104.588	23433.2	1.15983	0.0734988	0.964677	1.72817	1.53627	0.170606	1.19563	0.778266	1015.45	22.0168		1019.07	19.3679	1026.84	38.2792		1026.84	38.2792	1015.45	22.0168	1015.45	22.0168	1.10908	4.26471
299	515.027	61478.3	2.36413	0.0749762	0.977899	1.77937	2.09051	0.172199	1.84769	0.883845	1024.21	34.2952		1037.95	26.637	1067.01	38.4963		1067.01	38.4963	1024.21	34.2952	1024.21	34.2952	4.01051	4.72487
46	446.996	21842.9	24.0457	0.0739827	0.879963	1.75848	1.99371	0.172463	1.789	0.897325	1025.67	33.2493		1030.29	25.2952	1040.1	34.8517		1040.1	34.8517	1025.67	33.2493	1025.67	33.2493	1.38759	4.59757
36	302.288	16350	38.7503	0.0751659	0.749132	1.79228	1.55697	0.17301	1.36491	0.87664	1028.68	25.4359		1042.65	19.8897	1072.09	29.4776		1072.09	29.4776	1028.68	25.4359	1028.68	25.4359	4.04903	3.54814
272	125.484	119344	1.88409	0.0740767	0.853239	1.76685	1.47851	0.173063	1.20746	0.816677	1028.97	22.5077		1033.36	18.7904	1042.66	33.7806		1042.66	33.7806	1028.97	22.5077	1028.97	22.5077	1.31356	3.85779
163	127.744	36541.8	2.16405	0.0746324	0.996604	1.79902	1.4091	0.174903	0.996163	0.70695	1039.07	18.737		1045.1	18.0248	1057.76	39.325		1057.76	39.325	1039.07	18.737	1039.07	18.737	1.76742	4.05896
139	110.296	36161.6	2.84553	0.0729138	1.11944	1.75996	1.64731	0.175138	1.2085	0.733624	1040.36	22.757		1030.83	20.9063	1010.66	44.4879		1010.66	44.4879	1040.36	22.757	1040.36	22.757	-2.93867	5.05987
189	367.484	1.16652e+06	3.09219	0.0767895	0.974095	1.85662	1.99232	0.175432	1.73796	0.872326	1041.97	32.7737		1065.79	25.7715	1114.88	38.1279		1114.88	38.1279	1041.97	32.7737	1041.97	32.7737	6.5396	4.34255
251	26.8561	7554.06	1.6781	0.0752739	1.46697	1.82737	1.9306	0.176145	1.25508	0.650096	1045.88	23.7495		1055.33	24.8339	1074.97	57.7113		1074.97	57.7113	1045.88	23.7495	1045.88	23.7495	2.70633	5.67138
115	285.561	497295	4.71082	0.0769092	0.82266	1.86722	1.37865	0.176159	1.10631	0.802455	1045.96	20.9358		1069.55	17.8685	1117.99	32.1779		1117.99	32.1779	1045.96	20.9358	1045.96	20.9358	6.44258	3.27991
292	207.812	21561.4	2.93306	0.0757317	0.788566	1.85869	1.3124	0.178081	1.04908	0.799356	1056.48	20.0366		1066.52	16.9826	1087.12	30.9802		1087.12	30.9802	1056.48	20.0366	1056.48	20.0366	2.81849	3.32666
308	136.084	8591.47	1.24032	0.0753725	1.19962	1.85537	1.82198	0.17861	1.37132	0.752655	1059.38	26.2573		1065.34	23.5624	1077.56	47.1564		1077.56	47.1564	1059.38	26.2573	1059.38	26.2573	1.68766	4.94449
173	80.1318	33867.4	2.30638	0.0807892	1.32335	1.99279	2.29392	0.178976	1.87371	0.816818	1061.38	35.9392		1113.07	30.4006	1215.46	51.0001		1215.46	51.0001	1061.38	35.9392	1061.38	35.9392	12.6765	4.70832
166	114.608	39119.3	2.85331	0.0753914	1.14518	1.86162	1.74955	0.179166	1.32268	0.75601	1062.42	25.3927		1067.56	22.6521	1078.1	45.0303		1078.1	45.0303	1062.42	25.3927	1062.42	25.3927	1.45451	4.74231
73	32.0194	4947.29	1.67986	0.0739844	1.39891	1.83431	1.83588	0.179895	1.18892	0.647598	1066.4	22.9035		1057.82	23.6471	1040.14	55.386		1040.14	55.386	1066.4	22.9035	1066.4	22.9035	-2.5245	5.8866
96	63.4456	8897.56	3.49649	0.0750642	1.37031	1.86383	1.77012	0.180161	1.12052	0.63302	1067.86	21.613		1068.35	22.928	1069.37	54.0166		1069.37	54.0166	1067.86	21.613	1067.86	21.613	0.14137	5.43398
258	549.015	13571.1	1.44624	0.0813378	0.997538	2.02423	2.16309	0.180574	1.91934	0.887315	1070.11	37.0928		1123.68	28.8161	1228.78	38.3677		1228.78	38.3677	1070.11	37.0928	1070.11	37.0928	12.913	4.06281
134	171.714	117339	2.6988	0.0764622	0.911206	1.90477	1.48908	0.180752	1.17774	0.790916	1071.08	22.7797		1082.76	19.4334	1106.31	35.6958		1106.31	35.6958	1071.08	22.7797	1071.08	22.7797	3.18406	3.74141
23	207.214	71059	1.97586	0.0759981	0.812273	1.90469	1.2955	0.181849	1.00923	0.779024	1077.07	19.6206		1082.73	16.9068	1094.15	31.8771		1094.15	31.8771	1077.07	19.6206	1077.07	19.6206	1.56118	3.38242
242	97.0547	152710	1.0608	0.0740346	1.06025	1.86118	1.52647	0.182407	1.09817	0.71942	1080.11	21.4052		1067.4	19.762	1041.51	41.9769		1041.51	41.9769	1080.11	21.4052	1080.11	21.4052	-3.70598	4.6577
1	231.142	20804.3	1.7274	0.0755573	0.982028	1.90695	1.57309	0.183126	1.22892	0.781212	1084.03	24.0336		1083.52	20.538	1082.51	38.5916		1082.51	38.5916	1084.03	24.0336	1084.03	24.0336	-0.140521	4.20407
180	113.378	25449.7	1.26385	0.0744487	1.02535	1.88136	1.63643	0.183359	1.27537	0.779362	1085.3	24.9688		1074.54	21.2655	1052.8	40.5259		1052.8	40.5259	1085.3	24.9688	1085.3	24.9688	-3.08667	4.62288
241	343.84	177247	6.12752	0.0751395	1.05097	1.90587	2.09124	0.18404	1.80797	0.864545	1089.01	35.507		1083.14	27.2982	1071.38	41.3847		1071.38	41.3847	1089.01	35.507	1089.01	35.507	-1.64556	5.13804
37	229.007	32994.9	1.76371	0.0748049	0.95844	1.89911	1.41185	0.184207	1.03668	0.734272	1089.92	20.375		1080.78	18.4065	1062.41	37.757		1062.41	37.757	1089.92	20.375	1089.92	20.375	-2.58963	4.11958
62	142.046	32021.2	4.18001	0.0769307	0.916972	1.95915	1.42466	0.18478	1.09033	0.765325	1093.04	21.4857		1101.59	18.772	1118.54	35.8371		1118.54	35.8371	1093.04	21.4857	1093.04	21.4857	2.28042	3.67313
50	242.836	26386.5	2.75011	0.0759963	0.902872	1.94504	1.60229	0.185705	1.32369	0.826124	1098.06	26.1944		1096.74	21.0611	1094.08	35.4253		1094.08	35.4253	1098.06	26.1944	1098.06	26.1944	-0.363907	4.0364
82	291.478	13525.9	3.24875	0.0823703	0.918504	2.11164	1.5472	0.18601	1.24506	0.804719	1099.72	24.6725		1152.61	20.8967	1253.5	35.1962		1253.5	35.1962	1099.72	24.6725	1099.72	24.6725	12.2678	3.15315
101	82.9719	20916.9	1.30257	0.076676	1.33775	1.9664	1.85647	0.186081	1.28721	0.693364	1100.11	25.5158		1104.08	24.4928	1111.89	52.3259		1111.89	52.3259	1100.11	25.5158	1100.11	25.5158	1.05955	5.19097
151	36.7523	10235.6	1.37144	0.0755473	1.29882	1.9424	1.94283	0.186555	1.44487	0.743694	1102.68	28.7027		1095.83	25.5259	1082.25	51.0271		1082.25	51.0271	1102.68	28.7027	1102.68	28.7027	-1.88864	5.48745
174	112.452	286982	1.09316	0.0774939	0.976652	1.99293	1.4707	0.1866	1.0996	0.747668	1102.93	21.8482		1113.12	19.4904	1133.05	38.0725		1133.05	38.0725	1102.93	21.8482	1102.93	21.8482	2.6578	3.79697
261	567.511	45478.3	3.62376	0.0757442	0.907663	1.94834	2.02417	0.186639	1.80925	0.893826	1103.14	35.955		1097.87	26.6223	1087.46	35.6191		1087.46	35.6191	1103.14	35.955	1103.14	35.955	-1.44187	4.68741
219	229.195	54907.6	7.00983	0.0759383	0.882618	1.96017	1.38164	0.187292	1.06297	0.769355	1106.69	21.1864		1101.94	18.2083	1092.59	34.6109		1092.59	34.6109	1106.69	21.1864	1106.69	21.1864	-1.2903	3.74907
84	184.816	27703.9	2.06003	0.0752603	0.964827	1.95726	1.59237	0.188699	1.26679	0.795536	1114.33	25.4084		1100.94	20.9752	1074.61	37.9515		1074.61	37.9515	1114.33	25.4084	1114.33	25.4084	-3.69602	4.35915
231	462.241	40405.2	85.9594	0.075872	0.720307	1.97585	1.71358	0.188956	1.55484	0.907361	1115.72	31.2215		1107.31	22.6439	1090.8	28.2624		1090.8	28.2624	1115.72	31.2215	1115.72	31.2215	-2.2839	3.90074
121	181.127	61317.2	2.3508	0.0778207	0.906715	2.03352	1.41538	0.189602	1.08681	0.76786	1119.22	21.8861		1126.8	18.8831	1141.43	35.3362		1141.43	35.3362	1119.22	21.8861	1119.22	21.8861	1.94634	3.59039
80	192.742	271665	2.83014	0.0760756	0.949107	1.99095	1.49268	0.189891	1.15208	0.771819	1120.78	23.2302		1112.45	19.7751	1096.21	37.261		1096.21	37.261	1120.78	23.2302	1120.78	23.2302	-2.24176	4.07042
227	79.3543	34574.9	3.53618	0.0768564	1.20617	2.01431	1.7074	0.190167	1.20846	0.707777	1122.28	24.3968		1120.35	22.708	1116.62	47.1594		1116.62	47.1594	1122.28	24.3968	1122.28	24.3968	-0.506999	4.77412
92	99.4501	55584.1	1.80801	0.0781428	1.01652	2.05003	1.49087	0.190352	1.09059	0.731512	1123.28	22.0352		1132.3	19.9432	1149.62	39.5871		1149.62	39.5871	1123.28	22.0352	1123.28	22.0352	2.29105	3.87226
265	148.261	11029	5.15415	0.0766705	1.08051	2.01441	1.69305	0.190637	1.30343	0.769868	1124.83	26.3688		1120.38	22.5175	1111.74	42.2944		1111.74	42.2944	1124.83	26.3688	1124.83	26.3688	-1.17656	4.52118
110	173.345	38722.7	2.99851	0.0763436	0.913368	2.00751	1.51776	0.190797	1.21217	0.798657	1125.69	24.5399		1118.05	20.163	1103.24	35.7981		1103.24	35.7981	1125.69	24.5399	1125.69	24.5399	-2.03484	3.98865
35	80.3875	31660.8	2.9722	0.0793276	0.9465	2.09177	1.33413	0.191327	0.940234	0.704754	1128.56	19.079		1146.11	17.964	1179.48	36.6913		1179.48	36.6913	1128.56	19.079	1128.56	19.079	4.31703	3.38765
188	149.164	78301.4	5.14926	0.0787117	0.948528	2.07702	1.55721	0.191465	1.23499	0.793078	1129.3	25.0753		1141.25	20.9199	1164.01	36.8586		1164.01	36.8586	1129.3	25.0753	1129.3	25.0753	2.98189	3.75211
228	479.43	63021.3	2.17024	0.0776471	1.04544	2.05014	2.05601	0.191578	1.77038	0.861074	1129.92	35.9638		1132.34	27.5045	1137	40.7311		1137	40.7311	1129.92	35.9638	1129.92	35.9638	0.622613	4.76222
310	182.456	47137.2	2.35859	0.0792106	0.918617	2.09956	1.27814	0.192324	0.888692	0.695303	1133.95	18.1119		1148.66	17.2307	1176.56	35.652		1176.56	35.652	1133.95	18.1119	1133.95	18.1119	3.62155	3.30133
218	129.393	10379.5	3.88855	0.0770681	1.18064	2.04488	1.71281	0.192523	1.24089	0.724475	1135.03	25.3118		1130.59	22.8936	1122.1	46.178		1122.1	46.178	1135.03	25.3118	1135.03	25.3118	-1.15161	4.73461
154	81.7339	6800.16	2.79511	0.0752464	0.975881	1.99747	1.78239	0.192611	1.4915	0.836797	1135.51	30.4355		1114.65	23.6393	1074.24	38.3878		1074.24	38.3878	1135.51	30.4355	1135.51	30.4355	-5.70364	4.72179
274	269.935	71546.7	2.50621	0.0773955	1.1262	2.05685	1.60723	0.19283	1.14668	0.713451	1136.69	23.4215		1134.57	21.5234	1130.52	43.9619		1130.52	43.9619	1136.69	23.4215	1136.69	23.4215	-0.545344	4.4248
290	285.349	60252.6	2.83764	0.0831992	1.13775	2.21688	2.03632	0.193335	1.68882	0.82935	1139.41	34.5706		1186.38	27.9298	1273.03	43.5038		1273.03	43.5038	1139.41	34.5706	1139.41	34.5706	10.4956	4.09025
94	128.501	36951.3	2.62631	0.0794154	0.992608	2.13649	1.75597	0.195202	1.44851	0.824903	1149.49	29.8909		1160.69	23.8058	1181.67	38.4569		1181.67	38.4569	1149.49	29.8909	1149.49	29.8909	2.72258	4.05232
213	55.3146	8409.76	1.92119	0.0814022	1.4756	2.19078	2.11931	0.195277	1.52122	0.717787	1149.9	31.4014		1178.11	28.961	1230.33	56.7686		1230.33	56.7686	1149.9	31.4014	1149.9	31.4014	6.53785	5.01108
220	41.2675	44270.2	6.29748	0.0873758	1.18313	2.35218	4.74738	0.195329	4.59758	0.968447	1150.18	94.9273		1228.22	66.3198	1367.94	44.6402		1367.94	44.6402	1150.18	94.9273	1150.18	94.9273	15.919	7.46219
7	151.09	9272.93	33.4442	0.0814115	0.737563	2.19602	1.40249	0.195721	1.19289	0.85055	1152.29	24.6708		1179.78	19.179	1230.56	28.3717		1230.56	28.3717	1152.29	24.6708	1152.29	24.6708	6.36037	2.94626
113	47.3883	80070.5	2.60845	0.0815435	1.0676	2.19976	1.57596	0.195737	1.15926	0.735588	1152.38	23.9769		1180.97	21.5629	1233.74	41.0513		1233.74	41.0513	1152.38	23.9769	1152.38	23.9769	6.59463	3.66556
303	94.3654	33550.3	2.51212	0.0791116	1.11992	2.14117	1.52278	0.196381	1.03181	0.677586	1155.85	21.3996		1162.2	20.6585	1174.09	43.4719		1174.09	43.4719	1155.85	21.3996	1155.85	21.3996	1.55335	4.07539
235	143.161	68447	1.51047	0.0796214	0.838931	2.15571	1.40232	0.196449	1.1237	0.801313	1156.21	23.312		1166.89	19.0651	1186.79	32.4414		1186.79	32.4414	1156.21	23.312	1156.21	23.312	2.57595	3.30919
248	80.01	38634.2	1.34593	0.0784857	1.04448	2.13617	1.52483	0.197485	1.11093	0.72856	1161.79	23.1486		1160.59	20.6709	1158.31	40.6392		1158.31	40.6392	1161.79	23.1486	1161.79	23.1486	-0.300616	4.04691
275	117.733	30369.4	2.53678	0.080928	0.858367	2.20315	1.46565	0.19753	1.188	0.810561	1162.04	24.7593		1182.04	20.0631	1218.86	33.1116		1218.86	33.1116	1162.04	24.7593	1162.04	24.7593	4.66167	3.29156
273	57.9782	15747.9	1.06064	0.0787535	1.21888	2.14876	1.59075	0.197973	1.02217	0.64257	1164.42	21.343		1164.65	21.605	1165.06	47.3315		1165.06	47.3315	1164.42	21.343	1164.42	21.343	0.0552065	4.45446
245	160.946	126156	1.78696	0.0781193	1.03903	2.1357	1.61997	0.198367	1.24287	0.767218	1166.54	25.9945		1160.43	21.9592	1149.03	40.4849		1149.03	40.4849	1166.54	25.9945	1166.54	25.9945	-1.52434	4.23247
131	190.178	160638	1.48348	0.0782165	0.895245	2.13904	1.50651	0.19843	1.21166	0.80428	1166.88	25.3483		1161.51	20.4313	1151.49	34.837		1151.49	34.837	1166.88	25.3483	1166.88	25.3483	-1.33644	3.77427
236	261.777	29247.8	2.33635	0.077014	1.01985	2.11157	1.41354	0.198941	0.978774	0.69243	1169.63	20.5203		1152.59	19.0912	1120.69	39.8483		1120.69	39.8483	1169.63	20.5203	1169.63	20.5203	-4.36721	4.13814
162	258.252	37294.7	2.16442	0.0775302	0.910481	2.13116	1.48429	0.199449	1.17224	0.789764	1172.36	24.6288		1158.96	20.1063	1134.01	35.485		1134.01	35.485	1172.36	24.6288	1172.36	24.6288	-3.38149	3.89638
119	307.525	36776.4	4.94425	0.0790337	0.739884	2.1734	1.35972	0.199533	1.1408	0.838993	1172.81	23.9765		1172.57	18.5338	1172.14	28.7399		1172.14	28.7399	1172.81	23.9765	1172.81	23.9765	-0.0572904	3.19422
313	79.8083	20011.5	1.23602	0.0815282	0.984694	2.25935	1.55156	0.201077	1.19904	0.7728	1181.1	25.3631		1199.7	21.4054	1233.37	37.8772		1233.37	37.8772	1181.1	25.3631	1181.1	25.3631	4.23779	3.58854
0	164.573	33396.4	2.50048	0.0799448	0.894191	2.21575	1.76077	0.201103	1.51682	0.861451	1181.24	32.0884		1186.03	24.1462	1194.79	34.5769		1194.79	34.5769	1181.24	32.0884	1181.24	32.0884	1.13351	3.9242
6	205.587	72739.6	2.03859	0.0786051	1.33129	2.17958	1.79285	0.201192	1.20083	0.669787	1181.72	25.4129		1174.54	24.46	1161.33	51.7182		1161.33	51.7182	1181.72	25.4129	1181.72	25.4129	-1.75611	5.03227
140	29.7075	9751.93	2.87308	0.0790795	1.18132	2.20156	1.89629	0.202001	1.48338	0.78225	1186.06	31.4974		1181.54	25.9528	1173.28	45.8491		1173.28	45.8491	1186.06	31.4974	1186.06	31.4974	-1.08914	4.77618
184	97.7577	31984.1	1.73637	0.0820022	1.03544	2.28503	1.62536	0.202188	1.25286	0.77082	1187.06	26.6232		1207.67	22.5013	1244.7	39.7894		1244.7	39.7894	1187.06	26.6232	1187.06	26.6232	4.63093	3.72415
252	153.014	20750.6	2.15984	0.0791557	0.940485	2.20816	1.51535	0.202412	1.18818	0.784096	1188.27	25.272		1183.63	20.7582	1175.19	36.473		1175.19	36.473	1188.27	25.272	1188.27	25.272	-1.11294	3.80426
3	52.6339	7635.63	2.75696	0.0804099	1.03949	2.2435	1.55498	0.202443	1.15647	0.743721	1188.43	24.6008		1194.75	21.4062	1206.22	40.0922		1206.22	40.0922	1188.43	24.6008	1188.43	24.6008	1.47459	3.85794
210	394.811	6222.26	1.27062	0.0895569	2.61582	2.51437	3.14458	0.203713	1.74525	0.555001	1195.23	37.3188		1276.19	44.782	1415.25	98.0688		1415.25	98.0688	1195.23	37.3188	1195.23	37.3188	15.5458	6.41885
18	121.401	31227	1.60086	0.0813147	0.92791	2.30414	1.32844	0.205602	0.950647	0.715613	1205.34	20.4841		1213.56	18.437	1228.23	35.6719		1228.23	35.6719	1228.23	35.6719	1205.34	20.4841	1.86306	3.30232
104	126.561	7188.95	1.79093	0.0878237	1.66982	2.49036	1.98362	0.205749	1.07071	0.539776	1206.13	23.0849		1269.23	28.1685	1377.78	62.9196		1377.78	62.9196	1377.78	62.9196	1206.13	23.0849	12.4581	4.33473
312	204.263	87529	18.7253	0.0813014	1.10567	2.30897	1.51474	0.206067	1.03534	0.683513	1207.83	22.3509		1215.04	21.0361	1227.9	42.5145		1227.9	42.5145	1227.9	42.5145	1207.83	22.3509	1.63502	3.86166
128	101.12	20136.7	1.74876	0.0818739	1.05792	2.33219	1.49998	0.206684	1.06336	0.708918	1211.13	23.0128		1222.15	20.894	1241.63	40.6353		1241.63	40.6353	1241.63	40.6353	1211.13	23.0128	2.45696	3.69136
153	196.385	27253.4	2.28597	0.0786429	0.998459	2.25198	1.59597	0.207774	1.24507	0.780133	1216.95	27.0629		1197.4	21.996	1162.28	38.7928		1162.28	38.7928	1162.28	38.7928	1216.95	27.0629	-4.70357	4.19929
244	179.848	54667.1	1.5603	0.0819717	0.816053	2.36472	1.57861	0.209316	1.35132	0.856019	1225.17	29.5526		1232.01	22.0805	1244.01	31.3323		1244.01	31.3323	1244.01	31.3323	1225.17	29.5526	1.51399	3.4346
278	78.9209	19028.1	1.68607	0.0795126	0.959421	2.31273	1.53942	0.211045	1.20388	0.782035	1234.39	26.5078		1216.2	21.3894	1184.08	37.1578		1184.08	37.1578	1184.08	37.1578	1234.39	26.5078	-4.24804	3.96406
143	354.949	80854.4	3.62714	0.0817872	0.912115	2.3885	1.52953	0.211899	1.22781	0.802735	1238.92	27.1249		1239.16	21.4575	1239.57	35.0568		1239.57	35.0568	1239.57	35.0568	1238.92	27.1249	0.0523818	3.57468
217	687.794	52282.7	2.21141	0.0844901	0.819564	2.49059	1.93728	0.213887	1.75539	0.906107	1249.49	39.08		1269.3	27.5113	1303	31.2039		1303	31.2039	1303	31.2039	1249.49	39.08	4.10641	3.77743
281	103.94	37916.3	4.26234	0.0822272	0.855155	2.42501	1.7738	0.213986	1.55405	0.876114	1250.02	34.6108		1250.04	24.9957	1250.06	32.7758		1250.06	32.7758	1250.06	32.7758	1250.02	34.6108	0.00335024	3.81312
164	205.956	28103.2	3.058	0.0799978	0.61166	2.3646	1.10497	0.21447	0.920239	0.832815	1252.59	20.5331		1231.97	15.4551	1196.08	23.6275		1196.08	23.6275	1196.08	23.6275	1252.59	20.5331	-4.72446	2.68826
160	74.8898	9673.01	1.9537	0.0891991	2.66127	2.64629	2.86254	0.21526	1.05441	0.368349	1256.78	23.5983		1313.61	41.351	1407.59	99.88		1407.59	99.88	1407.59	99.88	1256.78	23.5983	10.7137	6.55367
27	239.086	24901	3.81842	0.0886432	0.834746	2.63568	1.51926	0.215742	1.26939	0.835532	1259.34	28.4619		1310.65	21.9201	1395.61	31.3743		1395.61	31.3743	1395.61	31.3743	1259.34	28.4619	9.76431	2.87649
93	46.5684	23296.2	2.96966	0.0865245	1.16716	2.57368	1.75153	0.215826	1.30598	0.745625	1259.78	29.2917		1293.19	25.1053	1349.07	44.1536		1349.07	44.1536	1349.07	44.1536	1259.78	29.2917	6.61837	3.74903
21	311.768	12616.3	13.3883	0.0863135	0.881218	2.56887	1.90773	0.215949	1.69201	0.886922	1260.43	37.9676		1291.82	27.3301	1344.35	33.3559		1344.35	33.3559	1344.35	33.3559	1260.43	37.9676	6.24252	3.65895
120	31.2318	5416.9	1.89177	0.0835474	1.20122	2.50082	1.54643	0.217189	0.973906	0.629779	1267	21.9569		1272.27	21.986	1281.17	45.877		1281.17	45.877	1281.17	45.877	1267	21.9569	1.1056	3.93419
181	54.4836	55957	2.59279	0.0868889	0.988933	2.61628	1.53208	0.218478	1.17017	0.763775	1273.83	26.5102		1305.22	22.0602	1357.17	37.3706		1357.17	37.3706	1357.17	37.3706	1273.83	26.5102	6.14126	3.23959
161	178.31	1.6891e+06	2.63126	0.0827627	0.894818	2.49781	1.26394	0.218984	0.892665	0.706255	1276.51	20.2618		1271.4	17.9634	1262.76	34.2463		1262.76	34.2463	1262.76	34.2463	1276.51	20.2618	-1.08883	3.1766
157	357.516	34553	2.71326	0.0829031	0.945985	2.50286	2.17745	0.219055	1.96122	0.900698	1276.88	44.528		1272.86	30.9658	1266.07	36.1901		1266.07	36.1901	1266.07	36.1901	1276.88	44.528	-0.85411	4.54758
86	244.663	51407.6	3.03002	0.0813487	0.759163	2.4626	1.34274	0.21965	1.10753	0.824827	1280.03	25.2014		1261.13	19.0056	1229.05	29.2371		1229.05	29.2371	1229.05	29.2371	1280.03	25.2014	-4.14784	3.21599
282	114.374	62477.2	1.85423	0.0864418	1.02326	2.62867	1.68768	0.220648	1.34208	0.795226	1285.3	30.6523		1308.69	24.3324	1347.22	38.72		1347.22	38.72	1347.22	38.72	1285.3	30.6523	4.59657	3.563
56	108.796	20257.4	1.68354	0.0815062	1.02182	2.48258	1.45462	0.221004	1.03528	0.711717	1287.18	23.6764		1266.97	20.6374	1232.84	39.297		1232.84	39.297	1232.84	39.297	1287.18	23.6764	-4.40747	3.84237
108	286.255	12762.8	2.29072	0.0926918	1.6724	2.82644	2.00167	0.221252	1.09988	0.549484	1288.48	25.1769		1362.58	29.4275	1480.76	62.1418		1480.76	62.1418	1480.76	62.1418	1288.48	25.1769	12.9846	4.02814
271	57.6529	4056.75	2.70898	0.0847588	2.21975	2.58506	2.54617	0.221296	1.24729	0.489867	1288.72	28.5558		1296.42	36.5424	1309.16	84.4507		1309.16	84.4507	1309.16	84.4507	1288.72	28.5558	1.56175	6.71417
182	35.8109	8154.1	1.94976	0.0852441	1.64981	2.59997	2.10159	0.221305	1.30185	0.619459	1288.77	29.806		1300.63	30.2091	1320.24	62.667		1320.24	62.667	1320.24	62.667	1288.77	29.806	2.38356	5.15426
39	94.7498	42516	1.67256	0.0872132	0.902905	2.66185	1.49518	0.221457	1.19177	0.797076	1289.57	27.301		1317.94	21.6311	1364.36	34.084		1364.36	34.084	1364.36	34.084	1289.57	27.301	5.48145	3.09508
141	95.2151	34721.7	2.65714	0.0856164	0.919409	2.62177	1.57312	0.222191	1.27648	0.81143	1293.44	29.3207		1306.76	22.6642	1328.68	34.8806		1328.68	34.8806	1328.68	34.8806	1293.44	29.3207	2.65196	3.37651
240	398.421	49520.9	4.0562	0.0850837	0.852124	2.61359	1.95451	0.222884	1.75897	0.899957	1297.1	40.5069		1304.47	28.1353	1316.59	32.3827		1316.59	32.3827	1316.59	32.3827	1297.1	40.5069	1.48022	3.91634
138	132.05	26655.8	1.1988	0.0865737	0.93444	2.67239	1.61197	0.223976	1.3135	0.81484	1302.85	30.3692		1320.85	23.3461	1350.17	35.3453		1350.17	35.3453	1350.17	35.3453	1302.85	30.3692	3.50446	3.38239
284	95.6259	33917	3.19514	0.0856833	0.990148	2.65783	1.62552	0.225071	1.28915	0.793071	1308.61	29.9252		1316.82	23.5072	1330.19	37.5561		1330.19	37.5561	1330.19	37.5561	1308.61	29.9252	1.62181	3.57436
285	262.671	16000.9	2.73519	0.0864925	0.941891	2.68313	2.17	0.225087	1.95493	0.900888	1308.7	45.3828		1323.82	31.4635	1348.36	35.6358		1348.36	35.6358	1348.36	35.6358	1308.7	45.3828	2.94106	4.23186
25	196.395	31065.8	2.70554	0.0860123	0.884333	2.67325	1.42652	0.22551	1.11933	0.78466	1310.92	26.0245		1321.09	20.6617	1337.6	33.5072		1337.6	33.5072	1337.6	33.5072	1310.92	26.0245	1.99424	3.13253
208	188.613	25637.9	3.08351	0.0853314	0.799705	2.66662	1.54808	0.226746	1.32552	0.856239	1317.42	30.9562		1319.26	22.4074	1322.22	30.3662		1322.22	30.3662	1322.22	30.3662	1317.42	30.9562	0.36262	3.27378
63	272.061	54285.6	0.700336	0.0922214	1.00883	2.88507	1.8187	0.226993	1.51325	0.832051	1318.72	35.3718		1378.02	26.8802	1471.11	37.5324		1471.11	37.5324	1471.11	37.5324	1318.72	35.3718	10.3586	3.31841
38	92.8745	25378	2.47482	0.0864456	0.821712	2.71354	1.45557	0.227762	1.20144	0.825412	1322.76	28.1608		1332.17	21.1682	1347.31	31.0939		1347.31	31.0939	1347.31	31.0939	1322.76	28.1608	1.82195	3.08264
106	459.474	56284.3	2.81362	0.0855914	0.848967	2.691	2.3529	0.228124	2.1944	0.932636	1324.66	51.5017		1325.99	34.143	1328.11	32.2111		1328.11	32.2111	1328.11	32.2111	1324.66	51.5017	0.259791	4.57047
156	92.2988	36600.6	2.56641	0.0859636	1.00051	2.70291	1.51431	0.228142	1.13671	0.750646	1324.75	26.6796		1329.26	21.9991	1336.5	37.9141		1336.5	37.9141	1336.5	37.9141	1324.75	26.6796	0.879098	3.44841
209	278.727	53579.5	1.44122	0.0858087	0.849405	2.69941	1.4473	0.228258	1.17183	0.809668	1325.36	27.5155		1328.3	21.0183	1333.02	32.2039		1333.02	32.2039	1333.02	32.2039	1325.36	27.5155	0.574359	3.16706
296	291.885	41838	2.92564	0.0851707	0.768402	2.68013	1.56635	0.228325	1.36493	0.871403	1325.72	32.0572		1322.99	22.7032	1318.57	29.1919		1318.57	29.1919	1318.57	29.1919	1325.72	32.0572	-0.542117	3.29628
70	47.7424	8549.06	2.47411	0.085038	1.1875	2.67721	1.54928	0.228432	0.995033	0.642257	1326.28	23.3786		1322.19	22.449	1315.54	45.1321		1315.54	45.1321	1315.54	45.1321	1326.28	23.3786	-0.815771	3.8885
212	164.553	27589.8	2.82022	0.0844341	0.885779	2.6609	1.66876	0.228664	1.41427	0.847497	1327.5	33.2562		1317.67	24.1403	1301.71	33.7309		1301.71	33.7309	1301.71	33.7309	1327.5	33.2562	-1.98074	3.67564
135	48.7606	6570.46	2.0895	0.0848079	1.10201	2.67692	1.51088	0.229027	1.03361	0.684109	1329.4	24.3364		1322.1	21.892	1310.29	41.917		1310.29	41.917	1310.29	41.917	1329.4	24.3364	-1.45821	3.73956
269	174.069	43226.5	2.17324	0.0856383	0.968486	2.70389	1.46706	0.229092	1.10195	0.751128	1329.74	25.9514		1329.53	21.3147	1329.17	36.7396		1329.17	36.7396	1329.17	36.7396	1329.74	25.9514	-0.0425869	3.38509
170	37.0813	24321.2	2.25683	0.0886618	1.24916	2.80368	1.94298	0.229446	1.48821	0.765941	1331.59	35.0921		1356.52	28.5042	1396.01	46.9487		1396.01	46.9487	1396.01	46.9487	1331.59	35.0921	4.6143	4.07546
294	36.6426	25684.6	2.58882	0.0883802	1.14082	2.79976	1.7497	0.229855	1.32665	0.758212	1333.74	31.3278		1355.47	25.659	1389.91	42.9122		1389.91	42.9122	1389.91	42.9122	1333.74	31.3278	4.04132	3.72257
88	111.419	687940	1.71212	0.0865039	1.00497	2.74263	1.46331	0.230048	1.06363	0.726867	1334.75	25.134		1340.09	21.3416	1348.61	38.0207		1348.61	38.0207	1348.61	38.0207	1334.75	25.134	1.0275	3.35545
145	349.351	57163.9	4.94219	0.0869491	1.37453	2.75696	2.42544	0.230066	1.99836	0.823914	1334.85	47.2252		1343.97	35.4256	1358.51	51.9314		1358.51	51.9314	1358.51	51.9314	1334.85	47.2252	1.74182	5.11786
301	180.666	645913	2.5986	0.0916843	0.760425	2.91202	1.11612	0.230456	0.816989	0.731992	1336.89	19.3336		1385.04	16.5348	1460.01	28.3326		1460.01	28.3326	1460.01	28.3326	1336.89	19.3336	8.43292	2.21608
42	78.0206	10038.8	1.15315	0.0879993	0.681029	2.8052	1.52442	0.231298	1.36384	0.894661	1341.3	32.3703		1356.93	22.3664	1381.61	25.6455		1381.61	25.6455	1381.61	25.6455	1341.3	32.3703	2.91804	2.95579
132	63.2126	10605.2	3.01687	0.0867609	1.12683	2.78169	1.75636	0.232633	1.34724	0.767062	1348.28	32.126		1350.63	25.7126	1354.33	42.5976		1354.33	42.5976	1354.33	42.5976	1348.28	32.126	0.446498	3.92829
33	126.435	191037	2.33444	0.0877075	1.02368	2.8439	1.58409	0.235269	1.20889	0.763147	1362.06	29.0916		1367.2	23.3253	1375.23	38.5856		1375.23	38.5856	1375.23	38.5856	1362.06	29.0916	0.957922	3.49243
14	177.815	34851.8	2.09663	0.0875185	0.957933	2.8393	1.64315	0.235396	1.33503	0.812482	1362.72	32.141		1365.99	24.1849	1371.08	36.128		1371.08	36.128	1371.08	36.128	1362.72	32.141	0.609974	3.51484
83	136.897	20595.1	3.13602	0.0880425	0.92191	2.86021	1.54606	0.235718	1.24112	0.802764	1364.4	29.9132		1371.5	22.7991	1382.56	34.7122		1382.56	34.7122	1382.56	34.7122	1364.4	29.9132	1.31354	3.28944
266	208.822	37641.5	2.27202	0.0846454	0.772493	2.75336	1.31897	0.236019	1.06909	0.810545	1365.97	25.7935		1343	19.2566	1306.56	29.3976		1306.56	29.3976	1306.56	29.3976	1365.97	25.7935	-4.5465	3.07091
255	27.6918	3001.46	2.21559	0.0867475	1.02703	2.83412	1.42969	0.237055	0.9946	0.695675	1371.37	24.0815		1364.61	21.0328	1354.03	38.8266		1354.03	38.8266	1354.03	38.8266	1371.37	24.0815	-1.28007	3.40548
295	249.206	39762	3.02857	0.0851849	0.944534	2.7882	1.57988	0.237492	1.26644	0.801605	1373.64	30.709		1352.38	23.143	1318.89	35.8826		1318.89	35.8826	1318.89	35.8826	1373.64	30.709	-4.15163	3.66754
194	110.298	39241.6	2.89612	0.0876361	1.05006	2.87435	1.37258	0.237982	0.883941	0.644	1376.2	21.4698		1375.21	20.2665	1373.66	39.5883		1373.66	39.5883	1373.66	39.5883	1376.2	21.4698	-0.184434	3.28316
30	149.046	31616.3	3.30554	0.0881375	1.01979	2.89183	1.53561	0.238067	1.1481	0.747648	1376.64	27.8939		1379.78	22.7094	1384.63	38.3871		1384.63	38.3871	1384.63	38.3871	1376.64	27.8939	0.576908	3.41409
11	139.621	16828.7	2.70292	0.0876917	0.735485	2.87779	1.30424	0.238116	1.07709	0.825832	1376.89	26.1729		1376.11	19.2634	1374.88	27.7245		1374.88	27.7245	1374.88	27.7245	1376.89	26.1729	-0.146112	2.77525
98	424.155	117368	3.64638	0.0875517	0.831547	2.88281	2.0448	0.238912	1.86809	0.913578	1381.04	45.5168		1377.43	30.2162	1371.81	31.3585		1371.81	31.3585	1371.81	31.3585	1381.04	45.5168	-0.672752	4.03796
72	146.85	5185.9	1.00564	0.0983591	1.64847	3.24108	2.15641	0.239091	1.39021	0.644685	1381.97	33.8934		1467.04	32.7997	1592.41	60.3494		1592.41	60.3494	1592.41	60.3494	1381.97	33.8934	13.2154	3.91759
51	102.62	38418.5	3.43473	0.0880865	0.936977	2.90662	1.45474	0.239424	1.1128	0.764952	1383.7	27.1607		1383.63	21.5414	1383.52	35.2749		1383.52	35.2749	1383.52	35.2749	1383.7	27.1607	-0.0131873	3.21815
298	131.858	80821.1	2.4386	0.0875202	1.00243	2.89223	1.47216	0.23978	1.07815	0.732357	1385.55	26.3464		1379.89	21.7718	1371.12	37.8057		1371.12	37.8057	1371.12	37.8057	1385.55	26.3464	-1.0528	3.38465
267	90.8454	34675.4	2.51495	0.0897811	0.964304	2.98391	1.59713	0.241151	1.27317	0.797157	1392.68	31.2554		1403.53	23.8081	1420.03	36.1238		1420.03	36.1238	1420.03	36.1238	1392.68	31.2554	1.92598	3.32702
305	128.051	186574	2.67572	0.087433	0.879823	2.91586	1.42821	0.241979	1.12503	0.787721	1396.98	27.6951		1386.03	21.1657	1369.2	33.1907		1369.2	33.1907	1369.2	33.1907	1396.98	27.6951	-2.02885	3.19507
199	423.601	13953.8	3.20943	0.0942023	1.02997	3.14472	2.07958	0.242219	1.8066	0.868734	1398.22	44.509		1443.71	31.404	1511.34	38.1105		1511.34	38.1105	1511.34	38.1105	1398.22	44.509	7.48443	3.75707
175	75.6778	14908.1	2.10692	0.0937503	1.2237	3.14203	1.71116	0.243178	1.19609	0.698993	1403.2	29.5617		1443.05	25.8343	1502.25	45.3343		1502.25	45.3343	1502.25	45.3343	1403.2	29.5617	6.59343	3.43772
171	76.931	76781.2	2.04825	0.0951535	1.42934	3.19559	2.05603	0.243677	1.47792	0.718824	1405.78	36.5876		1456.09	31.168	1530.28	52.7573		1530.28	52.7573	1530.28	52.7573	1405.78	36.5876	8.13535	3.96824
19	80.4103	33957.8	3.7265	0.0920152	1.08454	3.09826	1.6409	0.244313	1.23138	0.750435	1409.08	30.5482		1432.26	24.6892	1466.85	40.3721		1466.85	40.3721	1466.85	40.3721	1409.08	30.5482	3.93866	3.3656
127	262.631	12441.4	2.71093	0.0937061	1.04217	3.16565	1.75205	0.245122	1.40839	0.803853	1413.27	35.0324		1448.82	26.4996	1501.36	38.613		1501.36	38.613	1501.36	38.613	1413.27	35.0324	5.86722	3.36241
15	170.803	119489	2.99879	0.0903548	0.787495	3.06644	1.2718	0.246247	0.998666	0.785237	1419.09	24.9323		1424.35	19.0871	1432.19	29.4515		1432.19	29.4515	1432.19	29.4515	1419.09	24.9323	0.914425	2.67999
270	70.7228	20204.9	3.64005	0.0910504	1.12433	3.09288	1.66554	0.246473	1.22878	0.737767	1420.26	30.6998		1430.93	25.0495	1446.81	41.9666		1446.81	41.9666	1446.81	41.9666	1420.26	30.6998	1.83508	3.55108
124	72.9745	22993.7	2.34082	0.0912126	0.894049	3.09976	1.47301	0.246582	1.17066	0.794737	1420.83	29.258		1432.63	22.1656	1450.2	33.3555		1450.2	33.3555	1450.2	33.3555	1420.83	29.258	2.02539	3.02466
185	144.226	35974.6	2.21847	0.0928091	0.895965	3.15623	1.56232	0.246755	1.27987	0.819216	1421.72	32.0057		1446.52	23.6126	1483.15	33.2793		1483.15	33.2793	1483.15	33.2793	1421.72	32.0057	4.14213	3.0468
224	155.584	53315.5	2.08227	0.090211	0.880639	3.06927	1.42068	0.246867	1.11482	0.784705	1422.3	27.8883		1425.05	21.3265	1429.15	32.9487		1429.15	32.9487	1429.15	32.9487	1422.3	27.8883	0.479577	3.01202
226	151.535	39012.6	2.09337	0.094549	1.02763	3.2248	1.67989	0.247476	1.32892	0.791071	1425.45	33.3099		1463.14	25.5204	1518.27	37.9888		1518.27	37.9888	1518.27	37.9888	1425.45	33.3099	6.11364	3.21432
172	212.756	69148.3	2.2983	0.0920281	0.901	3.1459	1.47956	0.248035	1.17359	0.793198	1428.33	29.4697		1444	22.3442	1467.12	33.5383		1467.12	33.5383	1467.12	33.5383	1428.33	29.4697	2.6439	2.99798
202	142.424	28072.7	1.65924	0.0910952	0.918189	3.1183	1.53389	0.248376	1.22872	0.801047	1430.1	30.8882		1437.21	23.1153	1447.75	34.2675		1447.75	34.2675	1447.75	34.2675	1430.1	30.8882	1.219	3.16523
148	87.4187	41681.9	2.9867	0.0923502	0.754402	3.17313	1.15257	0.249309	0.871381	0.75603	1434.91	21.971		1450.64	17.4418	1473.75	28.0563		1473.75	28.0563	1473.75	28.0563	1434.91	21.971	2.63571	2.3787
52	107.33	27805.7	2.71785	0.0912013	0.875446	3.13541	1.46868	0.249449	1.17925	0.802929	1435.63	29.747		1441.42	22.162	1449.96	32.6624		1449.96	32.6624	1449.96	32.6624	1435.63	29.747	0.988331	3.03043
198	77.4672	12986.5	3.11217	0.0912332	1.00485	3.13764	1.4615	0.249539	1.06125	0.726138	1436.1	26.7782		1441.97	22.0573	1450.63	37.4874		1450.63	37.4874	1450.63	37.4874	1436.1	26.7782	1.0016	3.15479
29	89.7291	32732.5	3.71968	0.0918888	0.94813	3.16896	1.55739	0.250232	1.23552	0.793328	1439.67	31.2448		1449.63	23.561	1464.24	35.3064		1464.24	35.3064	1464.24	35.3064	1439.67	31.2448	1.67834	3.18965
246	120.281	241909	2.79922	0.091769	0.964035	3.16701	1.67763	0.250404	1.37298	0.818406	1440.56	34.7402		1449.15	25.3765	1461.77	35.9106		1461.77	35.9106	1461.77	35.9106	1440.56	34.7402	1.45074	3.39257
206	135.203	9882.37	1.97331	0.0939538	1.09489	3.24318	1.63309	0.250464	1.21169	0.741961	1440.87	30.6647		1467.55	24.8426	1506.35	40.5397		1506.35	40.5397	1506.35	40.5397	1440.87	30.6647	4.34696	3.28191
183	149.84	33482.6	2.6237	0.0897836	1.18903	3.10854	1.72798	0.251216	1.25384	0.72561	1444.75	31.8077		1434.81	26.0206	1420.08	44.5425		1420.08	44.5425	1420.08	44.5425	1444.75	31.8077	-1.73687	3.89872
102	114.195	20681.4	1.84601	0.0914822	1.0191	3.18112	1.44446	0.252308	1.02367	0.708686	1450.37	26.0587		1452.58	21.8724	1455.81	37.9923		1455.81	37.9923	1455.81	37.9923	1450.37	26.0587	0.374171	3.15653
259	95.2774	13994.5	2.88262	0.0918715	1.1174	3.19647	1.81262	0.252451	1.42725	0.787393	1451.1	36.3489		1456.31	27.4794	1463.89	41.6118		1463.89	41.6118	1463.89	41.6118	1451.1	36.3489	0.873167	3.75568
195	217.472	35625.4	2.70812	0.0912992	1.01265	3.1826	1.7466	0.252931	1.42308	0.814772	1453.57	36.2977		1452.94	26.4509	1452.01	37.7711		1452.01	37.7711	1452.01	37.7711	1453.57	36.2977	-0.108024	3.60979
41	94.5473	179284	3.28434	0.093144	0.744689	3.24721	1.31578	0.252955	1.08477	0.824427	1453.7	27.6706		1468.51	20.0212	1489.98	27.6349		1489.98	27.6349	1489.98	27.6349	1453.7	27.6706	2.43475	2.59296
57	269.688	107662	2.2375	0.0912813	0.984136	3.18265	1.42472	0.252985	1.03019	0.723084	1453.85	26.2809		1452.96	21.5759	1451.63	36.7095		1451.63	36.7095	1451.63	36.7095	1453.85	26.2809	-0.153056	3.11326
152	166.771	39642	2.18839	0.0907672	0.801796	3.16619	1.38409	0.253102	1.12819	0.815117	1454.45	28.7917		1448.95	20.9345	1440.88	29.9512		1440.88	29.9512	1440.88	29.9512	1454.45	28.7917	-0.942283	2.89751
314	162.668	39208.5	1.64698	0.0905813	0.802974	3.16446	1.25909	0.253483	0.969817	0.770251	1456.41	24.7796		1448.53	19.0413	1436.97	30.0111		1436.97	30.0111	1436.97	30.0111	1456.41	24.7796	-1.35326	2.73027
277	328.029	38120.5	2.13428	0.0894944	0.959707	3.12925	2.30358	0.253707	2.09414	0.909083	1457.56	53.5451		1439.91	34.7458	1413.91	35.9814		1413.91	35.9814	1413.91	35.9814	1457.56	53.5451	-3.0874	4.60691
78	349.097	170583	2.52874	0.0903345	0.910069	3.15873	1.7629	0.253716	1.50983	0.856448	1457.61	38.6058		1447.13	26.6497	1431.76	34.0379		1431.76	34.0379	1431.76	34.0379	1457.61	38.6058	-1.80533	3.62328
67	196.015	27832.7	2.31056	0.0911817	0.844061	3.1902	1.30544	0.253862	0.995853	0.762851	1458.36	25.4753		1454.79	19.7806	1449.55	31.4932		1449.55	31.4932	1449.55	31.4932	1458.36	25.4753	-0.607869	2.80472
158	109.756	42145.2	2.68572	0.0913096	0.981161	3.19507	1.52664	0.253893	1.1696	0.766125	1458.52	29.9229		1455.97	23.1411	1452.22	36.5956		1452.22	36.5956	1452.22	36.5956	1458.52	29.9229	-0.433964	3.26361
74	445.674	163770	2.89746	0.0908746	0.668915	3.18174	1.79233	0.254045	1.66283	0.927747	1459.3	42.5619		1452.74	27.1419	1443.13	24.9797		1443.13	24.9797	1443.13	24.9797	1459.3	42.5619	-1.1206	3.42957
45	132.175	34727.8	1.49921	0.0919949	0.912476	3.2228	1.56021	0.25419	1.26556	0.811147	1460.05	32.408		1462.66	23.6986	1466.44	33.9686		1466.44	33.9686	1466.44	33.9686	1460.05	32.408	0.435817	3.19423
257	400.094	22147.4	2.50967	0.092462	0.772769	3.24156	1.9056	0.254377	1.74187	0.914083	1461.01	44.6316		1467.16	28.9852	1476.05	28.7305		1476.05	28.7305	1476.05	28.7305	1461.01	44.6316	1.01888	3.58535
68	323.585	4554.23	2.29875	0.100951	0.769175	3.54902	1.90365	0.255086	1.74134	0.914736	1464.65	44.7169		1538.22	29.5594	1640.84	27.9849		1640.84	27.9849	1640.84	27.9849	1464.65	44.7169	10.7379	3.12163
43	150.948	82995.6	1.82435	0.0906886	1.11019	3.19121	1.56771	0.255323	1.10688	0.70605	1465.87	28.4453		1455.03	23.7568	1439.22	41.4813		1439.22	41.4813	1439.22	41.4813	1465.87	28.4453	-1.8514	3.5389
12	185.564	32723.3	2.6158	0.0916003	0.843759	3.22695	1.44973	0.255613	1.1789	0.813182	1467.36	30.3234		1463.65	22.0271	1458.27	31.4449		1458.27	31.4449	1458.27	31.4449	1467.36	30.3234	-0.623406	3.00531
40	186.476	49006.2	1.77551	0.0921102	1.11424	3.36003	1.74848	0.264681	1.34745	0.770644	1513.75	35.6313		1495.13	26.818	1468.82	41.467		1468.82	41.467	1468.82	41.467	1468.82	41.467	-3.05916	3.78815
283	170.301	45852.5	2.87233	0.0923174	1.01205	3.26156	1.75685	0.256348	1.43606	0.817408	1471.13	37.0226		1471.93	26.761	1473.08	37.6419		1473.08	37.6419	1473.08	37.6419	1471.13	37.0226	0.132456	3.58176
230	105.065	22641.7	2.32566	0.0904919	0.933805	3.20275	1.52258	0.256803	1.2026	0.789846	1473.47	31.0478		1457.82	23.0927	1435.08	34.9099		1435.08	34.9099	1435.08	34.9099	1473.47	31.0478	-2.67452	3.30439
239	247.326	245993	1.40683	0.092531	0.918517	3.3454	1.42389	0.262331	1.08802	0.76412	1501.75	28.5686		1491.72	21.8172	1477.46	34.143		1477.46	34.143	1477.46	34.143	1477.46	34.143	-1.64402	3.04241
76	75.824	8596.16	1.94952	0.0912223	1.17768	3.23927	1.74174	0.257652	1.28325	0.736762	1477.82	33.2169		1466.61	26.4881	1450.4	43.9368		1450.4	43.9368	1450.4	43.9368	1477.82	33.2169	-1.89044	3.8434
196	238.629	204725	2.36804	0.0917928	0.994857	3.26726	2.01664	0.258263	1.75416	0.869845	1480.95	45.4922		1473.29	30.7314	1462.26	37.0564		1462.26	37.0564	1462.26	37.0564	1480.95	45.4922	-1.27823	4.03314
28	152.758	163032	1.11771	0.0943502	1.02483	3.36259	1.54345	0.258594	1.1541	0.747742	1482.64	29.9607		1495.73	23.6771	1514.3	37.9053		1514.3	37.9053	1514.3	37.9053	1482.64	29.9607	2.09024	3.14979
20	85.0733	22308.1	2.56005	0.091772	0.960611	3.27928	1.69906	0.259272	1.40144	0.824832	1486.12	36.4575		1476.15	25.9136	1461.83	35.7828		1461.83	35.7828	1461.83	35.7828	1486.12	36.4575	-1.66158	3.52312
279	185.223	23765.2	2.12446	0.0909546	0.965451	3.25649	1.45475	0.259784	1.08821	0.74804	1488.74	28.3534		1470.73	22.1509	1444.8	36.0457		1444.8	36.0457	1444.8	36.0457	1488.74	28.3534	-3.04072	3.23415
87	150.426	377800	2.89633	0.0932071	0.811867	3.3399	1.41632	0.259999	1.16053	0.819399	1489.84	30.2575		1490.43	21.6929	1491.26	30.1228		1491.26	30.1228	1491.26	30.1228	1489.84	30.2575	0.0951464	2.86169
16	121.868	31376.4	2.88273	0.091261	1.04684	3.27378	1.46007	0.260287	1.01781	0.697095	1491.31	26.5597		1474.84	22.2595	1451.21	39.0508		1451.21	39.0508	1451.21	39.0508	1491.31	26.5597	-2.76336	3.31607
286	184.768	295122	3.42803	0.0923749	0.891634	3.31486	1.30997	0.260375	0.959695	0.732608	1491.76	25.05		1484.56	20.0291	1474.26	33.1579		1474.26	33.1579	1474.26	33.1579	1491.76	25.05	-1.18696	2.84015
234	339.771	101888	2.37524	0.09328	0.83986	3.36994	1.76747	0.262133	1.55518	0.879891	1500.74	40.8106		1497.44	27.1276	1492.74	31.1553		1492.74	31.1553	1492.74	31.1553	1492.74	31.1553	-0.53635	3.44636
130	194.672	216528	3.33248	0.0934584	0.988697	3.44354	1.67389	0.267346	1.3507	0.806923	1527.32	36.0009		1514.39	25.8175	1496.35	36.659		1496.35	36.659	1496.35	36.659	1496.35	36.659	-2.06936	3.47007
187	52.8488	102600	1.29722	0.0983318	0.890386	3.76947	1.80549	0.278147	1.57067	0.869942	1582.02	43.1872		1586.27	28.4002	1591.9	32.5975		1591.9	32.5975	1591.9	32.5975	1591.9	32.5975	0.620306	3.39136
302	72.4032	16519.4	1.10332	0.0989509	1.35759	3.82661	1.86814	0.280596	1.28331	0.686945	1594.36	35.5284		1598.36	29.4781	1603.61	49.6295		1603.61	49.6295	1603.61	49.6295	1603.61	49.6295	0.576643	3.79165
116	56.6591	31665.7	3.39765	0.0996446	0.992425	3.82052	1.79303	0.278199	1.49334	0.832856	1582.29	41.0669		1597.08	28.2834	1616.63	36.2173		1616.63	36.2173	1616.63	36.2173	1616.63	36.2173	2.12445	3.35573
144	95.7096	24557.7	1.10615	0.0997509	0.909607	4.01515	1.40869	0.29206	1.07565	0.763582	1651.82	30.7211		1637.27	22.446	1618.62	33.186		1618.62	33.186	1618.62	33.186	1618.62	33.186	-2.0511	2.82492
58	199.6	127446	0.936592	0.0998263	1.03627	4.00858	1.56777	0.291362	1.17647	0.750405	1648.33	33.5382		1635.94	24.9729	1620.02	37.8008		1620.02	37.8008	1620.02	37.8008	1620.02	37.8008	-1.74739	3.14997
31	55.0878	143233	1.53674	0.0998488	1.11075	3.94867	1.49293	0.286943	0.997541	0.668175	1626.23	28.1023		1623.72	23.7088	1620.44	40.516		1620.44	40.516	1620.44	40.516	1620.44	40.516	-0.357442	3.05022
61	79.1102	29166.5	1.37071	0.100028	0.869833	4.08233	1.5403	0.296124	1.27119	0.825286	1672.06	36.6955		1650.78	24.6241	1623.78	31.7135		1623.78	31.7135	1623.78	31.7135	1623.78	31.7135	-2.97296	3.02518
95	110.364	33927.7	2.54914	0.100279	0.788391	3.93945	1.2777	0.285045	1.00546	0.786932	1616.72	28.1797		1621.83	20.2809	1628.44	28.7266		1628.44	28.7266	1628.44	28.7266	1628.44	28.7266	0.719287	2.46208
107	50.4631	79907.1	1.3549	0.100408	1.11175	4.2201	1.67545	0.304959	1.25345	0.748127	1715.85	37.0106		1677.94	26.958	1630.83	40.4983		1630.83	40.4983	1630.83	40.4983	1630.83	40.4983	-5.21351	3.46076
26	236.712	45752.2	0.836516	0.100718	0.762464	4.03983	1.46699	0.291035	1.25328	0.85432	1646.7	35.6969		1642.25	23.4035	1636.55	27.756		1636.55	27.756	1636.55	27.756	1636.55	27.756	-0.620494	2.76949
122	75.4867	36525.9	2.21097	0.100748	0.893089	3.73665	1.3732	0.269113	1.0431	0.759615	1536.3	27.9471		1579.26	21.5599	1637.1	32.5058		1637.1	32.5058	1637.1	32.5058	1637.1	32.5058	6.15718	2.52709
77	418.321	98860.8	1.0755	0.100904	0.942173	4.02973	2.03721	0.28977	1.80625	0.886629	1640.38	51.274		1640.22	32.4857	1639.99	34.2831		1639.99	34.2831	1639.99	34.2831	1639.99	34.2831	-0.0240969	3.76125
262	68.4443	29560	0.821177	0.100959	1.07814	3.88579	1.62877	0.27927	1.22086	0.749563	1587.68	33.6747		1610.73	25.7818	1640.99	39.2223		1640.99	39.2223	1640.99	39.2223	1640.99	39.2223	3.24821	3.09175
22	116.286	31038	1.51503	0.101014	0.755377	4.15575	1.26287	0.298508	1.01206	0.801391	1683.91	29.3962		1665.34	20.259	1642	27.4788		1642	27.4788	1642	27.4788	1642	27.4788	-2.55214	2.48
233	269.017	408600	1.40129	0.101138	0.860095	3.90513	1.38511	0.280163	1.08571	0.783844	1592.18	30.0216		1614.75	21.9469	1644.28	31.2791		1644.28	31.2791	1644.28	31.2791	1644.28	31.2791	3.1682	2.59359
9	215.539	59014.5	17.2233	0.1013	0.889947	3.78013	1.7031	0.270761	1.45209	0.852612	1544.66	39.0922		1588.53	26.8053	1647.24	32.3491		1647.24	32.3491	1647.24	32.3491	1647.24	32.3491	6.22724	3.00388
8	162.58	24349.2	2.01303	0.101521	1.19433	4.08916	1.77045	0.292258	1.30693	0.738193	1652.8	37.3462		1652.14	28.3131	1651.29	43.3926		1651.29	43.3926	1651.29	43.3926	1651.29	43.3926	-0.091734	3.46886
211	172.547	59207.7	0.75024	0.101603	0.822913	4.00718	1.34609	0.286166	1.06526	0.791372	1622.34	29.9469		1635.65	21.4399	1652.79	29.8909		1652.79	29.8909	1652.79	29.8909	1652.79	29.8909	1.84215	2.53659
60	124.572	24629.9	0.988056	0.101668	0.97858	4.0504	1.48614	0.289069	1.11848	0.752608	1636.87	31.6906		1644.38	23.7214	1653.97	35.5408		1653.97	35.5408	1653.97	35.5408	1653.97	35.5408	1.03355	2.86245
253	127.484	31085.1	0.91824	0.101712	0.84325	4.08759	1.40764	0.291596	1.12711	0.800709	1649.5	32.1512		1651.83	22.5087	1654.78	30.6219		1654.78	30.6219	1654.78	30.6219	1654.78	30.6219	0.318743	2.6791
85	182.977	137350	1.12286	0.102212	0.922264	4.20311	1.39711	0.298371	1.04945	0.751158	1683.22	30.4716		1674.63	22.4617	1663.85	33.4529		1663.85	33.4529	1663.85	33.4529	1663.85	33.4529	-1.1644	2.73698
264	130.068	541112	1.14476	0.102294	0.91466	4.06546	1.47271	0.288368	1.15424	0.783752	1633.37	32.6421		1647.4	23.5241	1665.33	33.1708		1665.33	33.1708	1665.33	33.1708	1665.33	33.1708	1.91937	2.76741
125	125.3	85133.4	2.02048	0.102652	0.796815	4.0616	1.36755	0.287091	1.11143	0.812716	1626.97	31.3232		1646.63	21.8401	1671.79	28.8727		1671.79	28.8727	1671.79	28.8727	1671.79	28.8727	2.68082	2.51703
90	32.8733	61491.4	4.05244	0.102907	1.02554	4.07361	1.65386	0.287225	1.2975	0.784532	1627.65	36.5807		1649.04	26.4284	1676.38	37.1401		1676.38	37.1401	1676.38	37.1401	1676.38	37.1401	2.90701	3.06412
243	112.093	17166.7	2.63656	0.103978	0.901761	4.26058	1.47538	0.297314	1.16772	0.791472	1677.97	33.8132		1685.78	23.7819	1695.49	32.5778		1695.49	32.5778	1695.49	32.5778	1695.49	32.5778	1.03301	2.75559
311	58.5464	15681.5	1.07848	0.10445	1.12595	4.20484	1.76808	0.292099	1.36321	0.771013	1652.01	38.938		1674.96	28.4289	1703.83	40.6355		1703.83	40.6355	1703.83	40.6355	1703.83	40.6355	3.04112	3.25116
123	113.326	1.88382e+06	1.92359	0.10449	0.851292	4.16322	1.46462	0.289098	1.19181	0.813734	1637.02	33.7708		1666.81	23.5039	1704.53	30.7192		1704.53	30.7192	1704.53	30.7192	1704.53	30.7192	3.96078	2.63079
169	127.214	37264.6	2.64496	0.104772	0.959732	4.33198	1.48749	0.300006	1.13646	0.764012	1691.34	33.1371		1699.47	24.0525	1709.49	34.6112		1709.49	34.6112	1709.49	34.6112	1709.49	34.6112	1.06194	2.78748
149	166.823	39533	1.18197	0.104793	0.854101	4.42176	1.61712	0.306161	1.37317	0.849144	1721.79	40.668		1716.42	26.2487	1709.87	30.7998		1709.87	30.7998	1709.87	30.7998	1709.87	30.7998	-0.69707	2.99115
178	152.961	30414.2	1.67922	0.104961	0.964549	4.38267	3.79845	0.302969	3.67394	0.967222	1706.01	107.94		1709.08	61.5704	1712.82	34.7704		1712.82	34.7704	1712.82	34.7704	1712.82	34.7704	0.397199	6.61831
249	111.569	28439.5	1.55704	0.106249	0.914005	4.54531	1.44405	0.310403	1.11798	0.774198	1742.69	33.4604		1739.3	23.5574	1735.22	32.8555		1735.22	32.8555	1735.22	32.8555	1735.22	32.8555	-0.430449	2.70822
150	217.845	21095.1	7.58912	0.107078	0.877577	4.62985	1.57714	0.31373	1.31044	0.830892	1759.04	39.5405		1754.67	25.8138	1749.45	31.4899		1749.45	31.4899	1749.45	31.4899	1749.45	31.4899	-0.548206	2.89551
55	67.2585	43855.6	3.15144	0.107082	0.871205	4.46739	1.53372	0.30271	1.26225	0.823004	1704.73	37.0596		1724.93	24.9418	1749.52	31.2609		1749.52	31.2609	1749.52	31.2609	1749.52	31.2609	2.56001	2.74198
204	347.854	95603.7	2.43094	0.108194	0.837617	4.68597	2.03638	0.314257	1.85614	0.911488	1761.62	56.078		1764.74	33.4027	1768.41	29.9849		1768.41	29.9849	1768.41	29.9849	1768.41	29.9849	0.383898	3.59289
280	219.292	85546.6	3.02449	0.109213	0.937677	4.91794	1.56721	0.326735	1.25575	0.801265	1822.53	39.0742		1805.34	25.9209	1785.52	33.4965		1785.52	33.4965	1785.52	33.4965	1785.52	33.4965	-2.07279	2.9079
75	56.8331	108556	2.58472	0.109318	1.08054	4.67955	1.55704	0.310599	1.12108	0.720007	1743.65	33.5694		1763.59	25.5329	1787.27	38.5924		1787.27	38.5924	1787.27	38.5924	1787.27	38.5924	2.44023	2.82234
306	242.203	23487.4	7.76528	0.109966	0.882458	4.7224	1.52576	0.311596	1.24467	0.815773	1748.56	37.3614		1771.22	25.0599	1798.03	31.4787		1798.03	31.4787	1798.03	31.4787	1798.03	31.4787	2.75164	2.68634
89	344.115	4609.45	2.11474	0.110854	2.44711	4.40254	2.98002	0.288164	1.70064	0.57068	1632.35	48.0681		1712.82	48.3388	1812.65	87.1368		1812.65	87.1368	1812.65	87.1368	1812.65	87.1368	9.94705	5.07662
147	142.343	14723.1	2.96026	0.111641	1.07833	4.72584	1.53687	0.307144	1.09507	0.712531	1726.64	32.5113		1771.83	25.2456	1825.5	38.3333		1825.5	38.3333	1825.5	38.3333	1825.5	38.3333	5.41548	2.66771
48	192.4	26378.5	3.5349	0.111668	0.704861	5.0066	1.19193	0.325313	0.961185	0.806408	1815.62	29.8102		1820.44	19.7727	1825.94	25.054		1825.94	25.054	1825.94	25.054	1825.94	25.054	0.564889	2.12764
24	104.473	18591.9	1.40806	0.111755	0.874436	5.27864	1.66717	0.342723	1.41944	0.851408	1899.75	45.7773		1865.41	27.8965	1827.34	31.0772		1827.34	31.0772	1827.34	31.0772	1827.34	31.0772	-3.9626	3.06622
216	284.839	58560.6	1.89605	0.112077	0.910493	4.96038	1.53444	0.321133	1.23511	0.804928	1795.26	37.9332		1812.6	25.4155	1832.56	32.3383		1832.56	32.3383	1832.56	32.3383	1832.56	32.3383	2.03552	2.69689
129	68.5134	131407	1.59345	0.112139	1.016	5.04189	1.66454	0.326229	1.3185	0.792112	1820.08	40.979		1826.39	27.6458	1833.57	36.0817		1833.57	36.0817	1833.57	36.0817	1833.57	36.0817	0.735826	2.96825
114	150.868	44262.8	1.52074	0.112352	0.974219	5.17046	1.4804	0.333915	1.11467	0.75295	1857.33	35.2557		1847.77	24.6888	1837	34.5833		1837	34.5833	1837	34.5833	1837	34.5833	-1.10634	2.70302
291	459.399	70587.7	3.17701	0.112524	1.01751	4.78831	1.91423	0.308762	1.62141	0.847026	1734.61	48.3317		1782.85	31.5172	1839.77	36.1083		1839.77	36.1083	1839.77	36.1083	1839.77	36.1083	5.71585	3.21335
133	161.86	37534.5	2.60415	0.112784	0.945574	5.21665	1.49158	0.335607	1.15356	0.773382	1865.5	36.6243		1855.34	24.911	1843.95	33.538		1843.95	33.538	1843.95	33.538	1843.95	33.538	-1.16864	2.70754
250	142.368	52542	2.65207	0.112938	0.81393	5.22293	1.32527	0.335552	1.04587	0.789179	1865.24	33.2012		1856.36	22.1374	1846.42	28.8594		1846.42	28.8594	1846.42	28.8594	1846.42	28.8594	-1.01886	2.39296
168	70.6439	73065.5	1.71224	0.113268	1.08986	5.01578	1.70788	0.321305	1.31493	0.769921	1796.1	40.4011		1821.99	28.3412	1851.7	38.6203		1851.7	38.6203	1851.7	38.6203	1851.7	38.6203	3.00279	2.97541
293	73.7589	24435.3	0.575594	0.113562	0.997044	5.25279	1.61571	0.335617	1.27138	0.786889	1865.55	40.3659		1861.23	27.0142	1856.38	35.3107		1856.38	35.3107	1856.38	35.3107	1856.38	35.3107	-0.493605	2.89517
53	223.561	111741	4.26567	0.114444	0.686331	5.19718	1.40096	0.329505	1.22132	0.871778	1835.98	38.2453		1852.15	23.3832	1870.35	24.268		1870.35	24.268	1870.35	24.268	1870.35	24.268	1.83737	2.40906
307	56.9241	36110.7	3.53925	0.114755	1.13645	5.26096	1.71452	0.332645	1.28377	0.748762	1851.19	40.4882		1862.55	28.6736	1875.24	40.1572		1875.24	40.1572	1875.24	40.1572	1875.24	40.1572	1.28289	3.02167
229	273.69	52155	3.37145	0.115387	0.940532	5.51518	1.54773	0.34681	1.22917	0.794178	1919.35	39.992		1902.96	26.0759	1885.13	33.1938		1885.13	33.1938	1885.13	33.1938	1885.13	33.1938	-1.81485	2.77751
155	219.318	4755.33	2.08673	0.116239	0.842713	4.85352	1.31641	0.302966	1.01132	0.768242	1706	29.7115		1794.23	21.7237	1898.37	29.694		1898.37	29.694	1898.37	29.694	1898.37	29.694	10.1334	2.10369
146	210.69	33849.2	1.10492	0.116881	0.771928	5.59225	1.4704	0.347159	1.25148	0.851115	1921.02	40.7482		1914.91	24.8254	1908.27	27.1711		1908.27	27.1711	1908.27	27.1711	1908.27	27.1711	-0.667996	2.57182
81	39.113	8420	0.671504	0.117188	1.10888	5.43314	1.73339	0.3364	1.3323	0.768609	1869.33	42.3738		1890.1	29.1368	1912.97	39.0064		1912.97	39.0064	1912.97	39.0064	1912.97	39.0064	2.28141	2.97939
207	30.3908	35705.6	1.21654	0.117911	1.15253	5.28929	1.84484	0.325484	1.44052	0.780839	1816.46	44.6943		1867.14	30.8799	1924.01	40.4891		1924.01	40.4891	1924.01	40.4891	1924.01	40.4891	5.59021	3.0567
201	237.884	6880.43	2.80833	0.118481	1.48546	5.29615	2.27691	0.32434	1.72562	0.757876	1810.89	53.3976		1868.24	38.1216	1932.64	52.1338		1932.64	52.1338	1932.64	52.1338	1932.64	52.1338	6.29969	3.74468
79	24.3433	63072.1	1.03852	0.120064	0.925964	5.44321	1.58808	0.32895	1.29019	0.81242	1833.29	40.3505		1891.69	26.7016	1956.38	32.4044		1956.38	32.4044	1956.38	32.4044	1956.38	32.4044	6.29165	2.58129
91	221.49	119250	3.59604	0.120981	0.874814	6.12087	1.35208	0.367101	1.03094	0.76248	2015.74	34.9778		1993.23	23.1307	1969.94	30.5655		1969.94	30.5655	1969.94	30.5655	1969.94	30.5655	-2.32503	2.38188
10	76.0802	16918	1.52363	0.121543	1.00759	6.03618	1.4519	0.360346	1.04536	0.719994	1983.82	34.9875		1981.08	24.7897	1978.21	35.1715		1978.21	35.1715	1978.21	35.1715	1978.21	35.1715	-0.283534	2.51141
66	276.958	510995	2.41429	0.122441	0.90882	6.20956	1.3619	0.367979	1.01431	0.744775	2019.88	34.4739		2005.8	23.3456	1991.31	31.6747		1991.31	31.6747	1991.31	31.6747	1991.31	31.6747	-1.43499	2.36652
186	72.5107	25204.4	2.02901	0.122815	0.818162	6.02191	1.3905	0.355771	1.12432	0.808573	1962.1	37.2777		1979.02	23.7332	1996.73	28.4966		1996.73	28.4966	1996.73	28.4966	1996.73	28.4966	1.73463	2.33499
118	99.7115	37236.1	88.1881	0.122999	1.04835	6.12383	1.5849	0.36125	1.18864	0.749976	1988.1	39.8561		1993.65	27.1159	1999.4	36.5045		1999.4	36.5045	1999.4	36.5045	1999.4	36.5045	0.565306	2.69621
276	81.5437	187621	2.24226	0.124185	0.802013	6.33111	1.25141	0.369911	0.960624	0.767634	2028.98	32.7743		2022.77	21.5086	2016.43	27.8746		2016.43	27.8746	2016.43	27.8746	2016.43	27.8746	-0.622645	2.13931
5	309.25	2745.11	1.73307	0.125113	3.32443	5.4026	3.93512	0.313321	2.10556	0.535069	1757.03	63.4695		1885.27	66.1075	2029.61	115.387		2029.61	115.387	2029.61	115.387	2029.61	115.387	13.43	5.83112
165	65.5619	27810.3	1.48217	0.128409	0.958145	6.58767	1.70239	0.37224	1.40715	0.826576	2039.93	48.2292		2057.7	29.4171	2075.53	33.0727		2075.53	33.0727	2075.53	33.0727	2075.53	33.0727	1.71498	2.80222
111	136.544	47946.4	1.34521	0.146609	0.757918	7.74501	1.45463	0.38331	1.24158	0.853534	2091.73	43.4692		2201.84	25.6404	2305.98	25.5076		2305.98	25.5076	2305.98	25.5076	2305.98	25.5076	9.29115	2.13547
200	137.838	31134	1.46308	0.149018	0.720616	8.95002	1.35838	0.435786	1.15148	0.847686	2331.75	44.1586		2332.92	24.318	2333.93	24.1803		2333.93	24.1803	2333.93	24.1803	2333.93	24.1803	0.0933049	2.15665
109	143.089	2877.3	2.04817	0.159524	1.29408	8.9583	1.96881	0.407461	1.48377	0.753637	2203.3	54.2742		2333.76	35.2514	2449.87	42.9127		2449.87	42.9127	2449.87	42.9127	2449.87	42.9127	10.0646	2.71838
309	252.532	4391.47	1.73695	0.16374	1.44932	9.66231	2.03976	0.428167	1.4353	0.703661	2297.45	54.3692		2403.12	36.7912	2493.91	47.8496		2493.91	47.8496	2493.91	47.8496	2493.91	47.8496	7.8776	2.80658
190	111.051	39209.1	1.9654	0.163769	0.807397	10.5948	1.56128	0.469405	1.33631	0.855902	2480.95	53.9373		2488.25	28.394	2494.2	26.6574		2494.2	26.6574	2494.2	26.6574	2494.2	26.6574	0.531245	2.40969
287	92.4377	31490.9	1.49901	0.16587	0.986334	10.6328	1.6439	0.465122	1.31513	0.800003	2462.13	52.7518		2491.57	29.906	2515.65	32.4908		2515.65	32.4908	2515.65	32.4908	2515.65	32.4908	2.12732	2.44848
191	69.0238	77497.2	1.17163	0.165928	0.992246	10.9903	1.54154	0.480596	1.17975	0.765302	2529.86	48.3847		2522.31	28.1223	2516.23	32.6837		2516.23	32.6837	2516.23	32.6837	2516.23	32.6837	-0.54153	2.32445
263	249.756	82630.8	2.14633	0.166326	0.983715	11.0317	1.48642	0.481249	1.11433	0.749677	2532.7	45.7438		2525.81	27.1249	2520.26	32.3898		2520.26	32.3898	2520.26	32.3898	2520.26	32.3898	-0.493697	2.22765
34	171.019	5.32223e+06	1.46694	0.167738	0.869704	11.2817	1.51434	0.488012	1.2397	0.818637	2562.07	51.3708		2546.69	27.6856	2534.46	28.6004		2534.46	28.6004	2534.46	28.6004	2534.46	28.6004	-1.08941	2.32586
137	69.8579	26773.9	0.500619	0.169351	0.968557	10.669	1.46829	0.457114	1.10353	0.751573	2426.8	43.7411		2494.74	26.7186	2550.5	31.7954		2550.5	31.7954	2550.5	31.7954	2550.5	31.7954	4.85006	2.08524
2	61.1928	29981	1.00069	0.173994	0.78226	11.1123	1.51469	0.463401	1.29705	0.856317	2454.56	51.8953		2532.59	27.6575	2595.7	25.5654		2595.7	25.5654	2595.7	25.5654	2595.7	25.5654	5.43745	2.20557
197	135.321	160737	1.17269	0.174751	0.823409	12.388	1.40519	0.514366	1.13866	0.810328	2675.24	48.8667		2634.27	25.878	2602.93	26.8919		2602.93	26.8919	2602.93	26.8919	2602.93	26.8919	-2.77814	2.15686
17	242.909	32890.9	1.50149	0.174897	0.792265	10.4599	1.53693	0.433942	1.31699	0.856898	2323.47	50.357		2476.37	27.92	2604.33	25.8711		2604.33	25.8711	2604.33	25.8711	2604.33	25.8711	10.7845	2.12702
205	146.412	40250.4	1.23066	0.17541	0.930316	12.4998	1.52666	0.517054	1.21045	0.792878	2686.67	52.1266		2642.71	28.134	2609.2	30.3661		2609.2	30.3661	2609.2	30.3661	2609.2	30.3661	-2.96906	2.32965
103	113.404	151423	1.03189	0.175918	0.983219	12.4196	1.42316	0.512256	1.02891	0.722977	2666.25	44.0367		2636.66	26.2139	2614.02	32.0845		2614.02	32.0845	2614.02	32.0845	2614.02	32.0845	-1.99825	2.09889
71	41.0695	193636	1.5848	0.179995	0.748915	12.3441	1.17995	0.497606	0.911823	0.772761	2603.5	38.2802		2630.93	21.7239	2652.09	24.3435		2652.09	24.3435	2652.09	24.3435	2652.09	24.3435	1.83205	1.70157
65	31.3979	15299.3	2.05816	0.181298	0.850256	12.3624	1.4921	0.494766	1.22614	0.821756	2591.26	51.2795		2632.33	27.4745	2664.04	27.6133		2664.04	27.6133	2664.04	27.6133	2664.04	27.6133	2.73188	2.17293
297	149.918	318454	2.52104	0.18321	0.962701	12.6843	1.46637	0.502349	1.10609	0.754307	2623.88	46.7306		2656.5	27.052	2681.41	31.2074		2681.41	31.2074	2681.41	31.2074	2681.41	31.2074	2.14547	2.08189
126	122.677	31015.4	0.922707	0.184132	0.73402	12.5694	1.1467	0.495306	0.880987	0.768279	2593.59	36.8713		2647.93	21.1401	2689.7	23.7742		2689.7	23.7742	2689.7	23.7742	2689.7	23.7742	3.57329	1.61419
215	228.267	64952	1.62552	0.184576	0.820732	13.4177	1.32094	0.527463	1.03503	0.783554	2730.76	45.1597		2709.51	24.4666	2693.69	26.5738		2693.69	26.5738	2693.69	26.5738	2693.69	26.5738	-1.37608	1.95214
304	111.799	33034.9	1.71373	0.185005	0.866176	13.2891	1.38025	0.521192	1.07463	0.778576	2704.24	46.521		2700.41	25.5481	2697.53	28.0356		2697.53	28.0356	2697.53	28.0356	2697.53	28.0356	-0.248706	2.01487
222	224.257	219843	0.88753	0.188064	0.797977	13.6364	1.29086	0.526115	1.01467	0.786043	2725.06	44.1974		2724.79	23.9361	2724.58	25.7618		2724.58	25.7618	2724.58	25.7618	2724.58	25.7618	-0.0178092	1.87771
99	82.9704	3630.97	0.872756	0.188376	1.55528	13.3707	2.00457	0.515013	1.26467	0.630895	2678	54.3197		2706.19	37.1222	2727.31	50.2073		2727.31	50.2073	2727.31	50.2073	2727.31	50.2073	1.80798	2.68968
288	120.768	69744.2	1.49093	0.197038	0.830139	13.9388	1.43263	0.51329	1.1676	0.815007	2670.66	50.0395		2745.55	26.6045	2801.09	26.6203		2801.09	26.6203	2801.09	26.6203	2801.09	26.6203	4.65636	2.00309
167	178.163	156179	2.41213	0.210806	0.92929	16.8592	1.42124	0.580284	1.07533	0.756616	2949.91	49.8913		2926.86	26.7026	2911.04	29.5093		2911.04	29.5093	2911.04	29.5093	2911.04	29.5093	-1.33537	1.99814
Rejected Analyses (>10% discordant; >5% reverse discordant; >10% 2σ uncertainty)
214	7.85411	830.579	3.04715	0.0631255	2.20833	1.51052	2.66373	0.173624	1.48955	0.559198	1032.05	27.8427		934.649	31.899	711.544	91.9916	x	711.544	91.9916	1032.05	27.8427	1032.05	27.8427	-45.0432	19.1557		x	x
193	205.65	25165.8	3.19468	0.0797906	0.914006	1.88424	1.67014	0.171345	1.39784	0.83696	1019.52	25.8357		1075.56	21.715	1190.96	35.3639		1190.96	35.3639	1019.52	25.8357	1019.52	25.8357	14.3952	3.34174	x		x
4	711.066	22098.7	13.175	0.0782502	0.936883	1.71737	2.02291	0.159246	1.79288	0.886287	952.583	31.1184		1015.04	25.4449	1152.35	36.4511		1152.35	36.4511	952.583	31.1184	952.583	31.1184	17.3356	3.75895	x		x
179	171.336	6312.52	0.848693	0.0828312	1.4324	2.00917	1.88283	0.175999	1.222	0.649023	1045.08	23.1073		1118.61	25.0201	1264.41	54.8386		1264.41	54.8386	1045.08	23.1073	1045.08	23.1073	17.3463	4.02373	x		x
247	193.593	3705.05	2.67892	0.0871202	1.26032	2.25577	1.81544	0.187872	1.30668	0.719761	1109.84	26.1119		1198.59	25.0341	1362.3	47.5919		1362.3	47.5919	1109.84	26.1119	1109.84	26.1119	18.532	3.43134	x		x
256	396.657	3298.4	3.30449	0.117404	1.21377	4.3637	2.21331	0.269688	1.85082	0.83622	1539.22	49.6711		1705.49	35.8398	1916.27	42.6799		1916.27	42.6799	1916.27	42.6799	1916.27	42.6799	19.6766	3.14949	x		x
100	461.509	21348.3	2.00811	0.104927	0.759318	3.30458	2.5617	0.228516	2.44658	0.95506	1326.71	57.5005		1482.13	39.1432	1712.22	27.3733		1712.22	27.3733	1712.22	27.3733	1326.71	57.5005	22.515	3.57943	x		x
49	62.2949	3394.48	3.84044	0.101144	5.01503	3.00588	5.4099	0.215636	2.02894	0.375041	1258.77	45.4738		1409.11	80.8328	1644.38	182.479	x	1644.38	182.479	1644.38	182.479	1258.77	45.4738	23.4501	8.93364	x		x
268	184.912	1754.93	1.61737	0.119229	0.974996	4.24032	1.58687	0.25805	1.25202	0.788984	1479.86	32.4482		1681.86	25.556	1943.91	34.1707		1943.91	34.1707	1943.91	34.1707	1479.86	32.4482	23.8721	2.13942	x		x
221	162.382	538.82	1.54222	0.250548	6.20892	15.5715	6.57995	0.450949	2.17832	0.331054	2399.47	85.5418		2850.88	123.206	3187.54	192.828		3187.54	192.828	3187.54	192.828	3187.54	192.828	24.7234	5.28574	x		x
117	158.409	3564.41	1.61865	0.100572	1.21142	2.89962	1.81409	0.209195	1.35033	0.744356	1224.53	29.5169		1381.81	26.8467	1633.86	44.1124		1633.86	44.1124	1633.86	44.1124	1224.53	29.5169	25.0528	2.71261	x		x
300	245.717	3423.98	1.83859	0.0958388	1.59233	2.58662	1.98614	0.19583	1.18713	0.597703	1152.88	24.563		1296.86	28.5085	1543.78	58.6696		1543.78	58.6696	1152.88	24.563	1152.88	24.563	25.3209	3.25367	x		x
192	118.772	1911.72	2.75874	0.112375	1.49889	3.65186	2.04054	0.235793	1.38461	0.678549	1364.79	33.38		1560.92	31.8827	1837.38	53.206		1837.38	53.206	1837.38	53.206	1364.79	33.38	25.7208	2.8155	x		x
136	427.668	4936.59	1.73286	0.0978669	1.01149	2.65325	1.81286	0.196711	1.50444	0.829872	1157.63	31.2458		1315.55	26.2044	1583.04	37.0747		1583.04	37.0747	1157.63	31.2458	1157.63	31.2458	26.873	2.61322	x		x
225	183.951	2544.32	1.6127	0.0978384	1.43839	2.62881	1.82721	0.194956	1.12682	0.616687	1148.17	23.228		1308.73	26.3447	1582.5	52.7285		1582.5	52.7285	1148.17	23.228	1148.17	23.228	27.4457	2.82821	x		x
64	95.8002	5092.74	1.75408	0.0975207	1.17906	2.5221	1.63947	0.187652	1.13916	0.694834	1108.64	22.7417		1278.43	23.3652	1576.41	43.2548		1576.41	43.2548	1108.64	22.7417	1108.64	22.7417	29.6729	2.40934	x		x
142	775.734	3591.05	2.09985	0.112704	1.09994	3.42226	2.05317	0.220324	1.73368	0.844391	1283.59	39.5486		1509.52	31.6239	1842.66	39.02		1842.66	39.02	1842.66	39.02	1283.59	39.5486	30.3407	2.6043	x		x
176	688.89	4195.65	7.22956	0.0867311	1.48064	1.87113	2.36781	0.156537	1.84776	0.780369	937.505	31.5994		1070.93	30.7127	1353.67	55.9768		1353.67	55.9768	937.505	31.5994	937.505	31.5994	30.7435	3.69474	x		x
177	395.981	3270.78	1.99127	0.0963186	1.4671	2.40355	2.78071	0.181063	2.36219	0.849492	1072.78	45.756		1243.66	39.0857	1553.16	53.9882		1553.16	53.9882	1072.78	45.756	1072.78	45.756	30.9292	3.80043	x		x
13	200.141	2850.47	1.36072	0.170522	0.923711	7.35982	1.36298	0.313166	1.00224	0.735326	1756.27	30.1995		2156.1	23.8818	2562.03	30.2888		2562.03	30.2888	2562.03	30.2888	2562.03	30.2888	31.4502	1.43045	x		x
105	353.271	4867.01	1.17196	0.103304	1.48535	2.79034	2.63829	0.195988	2.18044	0.826458	1153.73	45.1462		1352.95	38.6582	1683.49	53.7436		1683.49	53.7436	1153.73	45.1462	1153.73	45.1462	31.4679	3.46094	x		x
260	298.48	4606.23	1.91238	0.114382	0.895429	3.46226	2.2407	0.21963	2.05401	0.916681	1279.92	46.7349		1518.66	34.6034	1869.36	31.6618		1869.36	31.6618	1869.36	31.6618	1279.92	46.7349	31.5319	2.75591	x		x
232	283.645	1150.22	1.38245	0.170063	6.32844	6.85146	6.72362	0.292322	2.27111	0.33778	1653.12	64.9093		2092.4	116.902	2557.52	207.837		2557.52	207.837	2557.52	207.837	2557.52	207.837	35.3622	5.83382	x		x
32	495.466	12712.8	2.11091	0.140657	0.942756	4.38571	1.97398	0.226238	1.73431	0.878583	1314.75	40.429		1709.65	31.9937	2234.54	31.9733		2234.54	31.9733	2234.54	31.9733	1314.75	40.429	41.1624	1.99555	x		x
47	218.894	806.474	1.45532	0.1376	7.15551	4.11831	7.85597	0.217165	3.24268	0.412767	1266.88	73.101		1657.94	125.967	2196.44	244.02	x	2196.44	244.02	2196.44	244.02	1266.88	73.101	42.3214	7.22071	x		x
59	417.432	1809.11	0.909959	0.187984	2.00023	6.9415	3.08303	0.26793	2.34609	0.76097	1530.28	62.6395		2103.98	53.6438	2723.87	64.5966		2723.87	64.5966	2723.87	64.5966	2723.87	64.5966	43.8196	2.65771	x		x
289	698.56	1724.92	2.39917	0.100672	1.78542	1.9066	2.5438	0.137416	1.81196	0.712304	830.035	27.6593		1083.4	33.2111	1635.71	64.9993		830.035	27.6593	830.035	27.6593	830.035	27.6593	49.2552	2.63165	x		x
237	293.606	2112.23	1.09352	0.123073	1.92761	2.85972	4.4356	0.168597	3.99486	0.900634	1004.38	72.8224		1371.37	65.4279	2000.45	67.1207		2000.45	67.1207	1004.38	72.8224	1004.38	72.8224	49.7925	4.01119	x		x
112	239.606	334.528	2.65776	0.218843	2.01999	7.66263	2.60675	0.254058	1.64767	0.632075	1459.37	42.1755		2192.23	45.8977	2971.49	63.8078		2971.49	63.8078	2971.49	63.8078	1459.37	42.1755	50.8876	1.76825	x		x
159	494.14	1698.43	4.39061	0.111925	3.84927	2.30312	4.36399	0.149306	2.0561	0.471152	897.071	33.7491		1213.25	60.5754	1830.1	136.807		897.071	33.7491	897.071	33.7491	897.071	33.7491	50.9825	4.10212	x		x
97	445.075	733.687	0.974524	0.186824	5.62104	5.34689	6.7614	0.207662	3.75772	0.55576	1216.35	81.6425		1876.39	113.484	2713.67	181.833		2713.67	181.833	2713.67	181.833	1216.35	81.6425	55.1769	4.25112	x		x
69	16.2867	2069.55	0.501993	0.0985347	3.28394	1.52566	3.5883	0.112346	1.44625	0.403046	686.357	18.4558		940.755	43.1445	1595.75	120.202		686.357	18.4558	686.357	18.4558	686.357	18.4558	56.9883	3.44016	x		x
238	635.283	1264.15	1.0657	0.120662	1.86266	1.92849	4.11817	0.115967	3.67285	0.891864	707.31	48.224		1091.02	53.9846	1965.24	65.125		707.31	48.224	707.31	48.224	707.31	48.224	64.009	2.72834	x		x
W7 (F850-214), Gametrail Fm, Wernecke inlier (Ediacaran), University of Adelaide, n=83/130
19				0.07618	2.3497	1.62872	2.34786	0.15583	1.3027		933.6	22.148		981.4	28.9492	1099.7	90.9832		1099.7	90.9832	933.6	22.148	933.6	22.148	15.1041	7.30687
106				0.07787	2.67112	1.77858	2.65661	0.16567	1.54524		988.2	27.7536		1037.7	33.8492	1143.4	102.41		1143.4	102.41	988.2	27.7536	988.2	27.7536	13.5736	8.11253
45				0.07601	1.53927	1.74444	1.70886	0.16649	1.4115		992.7	25.4604		1025.1	21.6188	1095.3	59.7604		1095.3	59.7604	992.7	25.4604	992.7	25.4604	9.3673	5.46409
45				0.07537	1.88404	1.76603	1.94731	0.17018	1.32213		1013.1	24.2648		1033.1	24.7352	1078.3	73.108		1078.3	73.108	1013.1	24.2648	1013.1	24.2648	6.04655	6.75577
97				0.07369	1.2349	1.77653	1.42469	0.17489	1.30368		1039	24.5		1036.9	18.1496	1033.1	47.6868		1033.1	47.6868	1039	24.5	1039	24.5	-0.571097	5.21292
76				0.07664	1.59186	1.8713	1.71859	0.17713	1.36058		1051.3	25.872		1071	22.2852	1111.8	61.4656		1111.8	61.4656	1051.3	25.872	1051.3	25.872	5.44163	5.72218
24				0.0813	2.12792	2.00787	2.14406	0.1798	1.30701		1065.9	25.1272		1118.2	28.4788	1228.7	81.0068		1228.7	81.0068	1065.9	25.1272	1065.9	25.1272	13.2498	6.07396
46				0.08033	1.90464	1.98992	1.96993	0.17989	1.33415		1066.4	25.6956		1112.1	26.0876	1205.1	72.7944		1205.1	72.7944	1066.4	25.6956	1066.4	25.6956	11.5094	5.75488
74				0.07551	1.29784	1.88289	1.47274	0.18087	1.29928		1071.7	25.1664		1075.1	19.1492	1082	50.6072		1082	50.6072	1071.7	25.1664	1071.7	25.1664	0.951941	5.18377
13				0.07847	1.33809	1.9654	1.54014	0.18166	1.35968		1076	26.4404		1103.7	20.3056	1158.7	51.646		1158.7	51.646	1076	26.4404	1076	26.4404	7.13731	4.72645
56				0.07658	2.63776	1.91993	2.65843	0.18193	1.44011		1077.5	28.0476		1088	34.79	1110.4	101.371		1110.4	101.371	1077.5	28.0476	1077.5	28.0476	2.9629	9.21183
47				0.08158	2.73351	2.05367	2.73559	0.18279	1.43881		1082.2	28.126		1133.5	36.6128	1235.5	102.939		1235.5	102.939	1082.2	28.126	1082.2	28.126	12.4079	7.6448
100				0.07525	1.40864	1.90632	1.5564	0.18375	1.31701		1087.4	25.8328		1083.3	20.3252	1075.2	54.8016		1075.2	54.8016	1087.4	25.8328	1087.4	25.8328	-1.13467	5.68714
49				0.08233	1.74906	2.10028	1.82547	0.18522	1.32275		1095.4	26.1268		1148.9	24.6176	1253.4	65.856		1253.4	65.856	1095.4	26.1268	1095.4	26.1268	12.6057	5.04284
56				0.07824	2.28783	2.01696	2.33123	0.18696	1.51369		1104.9	30.1448		1121.2	31.0268	1153	87.6512		1153	87.6512	1104.9	30.1448	1104.9	30.1448	4.17173	7.73982
42				0.08032	2.55229	2.07771	2.55618	0.18789	1.40508		1109.9	28.1064		1141.5	34.3392	1205	96.726		1205	96.726	1109.9	28.1064	1109.9	28.1064	7.89212	7.75274
32				0.07961	1.85906	2.06802	1.90762	0.18891	1.28633		1115.5	25.872		1138.3	25.5976	1187.4	71.2656		1187.4	71.2656	1115.5	25.872	1115.5	25.872	6.05525	6.04475
73				0.07888	1.24239	2.08158	1.43016	0.19141	1.29042		1129	26.2248		1142.8	19.2276	1169	48.0396		1169	48.0396	1129	26.2248	1129	26.2248	3.42173	4.55899
66				0.08204	1.56021	2.18281	1.71522	0.19296	1.39925		1137.4	28.616		1175.6	23.422	1246.5	59.0548		1246.5	59.0548	1137.4	28.616	1137.4	28.616	8.75251	4.89474
80				0.07897	1.73484	2.1061	1.87598	0.19347	1.46276		1140.2	29.9488		1150.8	25.3232	1171.4	66.6596		1171.4	66.6596	1140.2	29.9488	1140.2	29.9488	2.66348	6.1006
2				0.08568	1.47059	2.28936	1.49474	0.19535	1.1569		1150.3	23.912		1209	20.6976	1330.9	55.4484		1330.9	55.4484	1150.3	23.912	1150.3	23.912	13.5698	4.02423
64				0.0801	1.66042	2.17351	1.77915	0.19686	1.35121		1158.4	28.1064		1172.6	24.2452	1199.4	63.406		1199.4	63.406	1158.4	28.1064	1158.4	28.1064	3.41838	5.61785
38				0.0796	1.40704	2.16326	1.51346	0.19753	1.24538		1162	25.9308		1169.3	20.5996	1187	54.0176		1187	54.0176	1162	25.9308	1162	25.9308	2.10615	4.96172
36				0.08397	1.47672	2.2823	1.56859	0.19758	1.25013		1162.3	26.1072		1206.8	21.6972	1291.8	55.8796		1291.8	55.8796	1162.3	26.1072	1162.3	26.1072	10.0248	4.3855
101				0.07987	2.2161	2.17675	2.22625	0.19767	1.45697		1162.8	30.3408		1173.6	30.3604	1193.9	84.5936		1193.9	84.5936	1162.8	30.3408	1162.8	30.3408	2.60491	7.35397
43				0.08417	2.45931	2.30357	2.47485	0.19879	1.40852		1168.8	29.4588		1213.4	34.3392	1296.3	92.4728		1296.3	92.4728	1168.8	29.4588	1168.8	29.4588	9.83569	6.82162
26				0.08626	1.24044	2.38641	1.45155	0.20064	1.33573		1178.7	28.1652		1238.5	20.3644	1344	46.8048		1344	46.8048	1178.7	28.1652	1178.7	28.1652	12.2991	3.70401
112				0.08272	2.03095	2.28867	2.1235	0.2007	1.52466		1179.1	32.1832		1208.8	29.4	1262.7	76.7144		1262.7	76.7144	1179.1	32.1832	1179.1	32.1832	6.62073	6.21942
54				0.07879	2.19571	2.17902	2.24321	0.20072	1.39		1179.2	29.4		1174.4	30.5956	1166.8	83.888		1166.8	83.888	1179.2	29.4	1179.2	29.4	-1.06274	7.69048
3				0.08009	1.36097	2.22517	1.53067	0.20151	1.32996		1183.4	28.1652		1189	21.0112	1199.2	52.2144		1199.2	52.2144	1183.4	28.1652	1183.4	28.1652	1.31755	4.89675
111				0.08165	1.24923	2.29549	1.44326	0.20392	1.31914		1196.3	28.2044		1210.9	20.0116	1237	47.7064		1237	47.7064	1196.3	28.2044	1196.3	28.2044	3.29022	4.37145
51				0.08742	1.85312	2.46229	1.9291	0.20445	1.35485		1199.2	29.0472		1261	27.3028	1369.6	69.4036		1369.6	69.4036	1199.2	29.0472	1199.2	29.0472	12.4416	4.91779
96				0.0812	1.51478	2.29783	1.64372	0.20526	1.33976		1203.5	28.7728		1211.6	22.7948	1226.3	57.918		1226.3	57.918	1226.3	57.918	1203.5	28.7728	1.85925	5.19519
31				0.08024	1.98156	2.27638	2.0168	0.20634	1.30367		1209.3	28.1848		1205	27.8908	1202.8	75.6364		1202.8	75.6364	1202.8	75.6364	1209.3	28.1848	-0.540406	6.74262
103				0.08729	1.26017	2.48808	1.46097	0.20673	1.35442		1211.4	29.2824		1268.6	20.7368	1366.9	47.2164		1366.9	47.2164	1366.9	47.2164	1211.4	29.2824	11.3761	3.73642
43				0.08141	1.59686	2.32826	1.72575	0.2074	1.3838		1214.9	30.0664		1220.9	24.0296	1231.3	60.7012		1231.3	60.7012	1231.3	60.7012	1214.9	30.0664	1.33193	5.44269
92				0.08335	1.43971	2.39748	1.58667	0.20867	1.33225		1221.7	29.0472		1241.8	22.2852	1277.3	54.7624		1277.3	54.7624	1277.3	54.7624	1221.7	29.0472	4.35293	4.68909
12				0.08796	3.5698	2.53483	3.50674	0.21024	1.48877		1230.1	32.6732		1282.1	50.0388	1381.6	131.261		1381.6	131.261	1381.6	131.261	1230.1	32.6732	10.9655	8.78323
83				0.08515	2.07868	2.53168	2.10967	0.21565	1.42824		1258.8	32.0264		1281.2	30.1056	1319	78.2432		1319	78.2432	1319	78.2432	1258.8	32.0264	4.56406	6.16
105				0.08811	1.32789	2.64283	1.50293	0.21755	1.32843		1268.9	29.9488		1312.6	21.6972	1384.8	49.5292		1384.8	49.5292	1384.8	49.5292	1268.9	29.9488	8.36944	3.92655
88				0.08458	1.2769	2.55917	1.45477	0.21946	1.29864		1279	29.5372		1289.1	20.8152	1305.9	48.2748		1305.9	48.2748	1305.9	48.2748	1279	29.5372	2.05988	4.26896
58				0.0883	2.46886	2.67642	2.49849	0.21994	1.45949		1281.6	33.2416		1322	36.2012	1389	91.3164		1389	91.3164	1389	91.3164	1281.6	33.2416	7.73218	6.52095
107				0.08578	1.46887	2.60992	1.61308	0.22068	1.34584		1285.5	30.7328		1303.4	23.2064	1333.2	55.3896		1333.2	55.3896	1333.2	55.3896	1285.5	30.7328	3.57786	4.62189
60				0.09358	1.77388	2.86182	1.87154	0.22188	1.37462		1291.8	31.5364		1371.9	27.5968	1499.7	65.2092		1499.7	65.2092	1499.7	65.2092	1291.8	31.5364	13.8628	4.29532
79				0.083	1.68675	2.54595	1.78951	0.22248	1.37091		1295	31.5168		1285.3	25.578	1269.2	63.5432		1269.2	63.5432	1269.2	63.5432	1295	31.5168	-2.03278	5.6799
102				0.0856	1.5771	2.64068	1.70032	0.22377	1.35854		1301.7	31.3404		1312	24.5392	1329	59.584		1329	59.584	1329	59.584	1301.7	31.3404	2.05418	4.98441
65				0.08755	1.21074	2.71606	1.39577	0.22503	1.28427		1308.4	29.8116		1332.9	20.3056	1372.6	45.374		1372.6	45.374	1372.6	45.374	1308.4	29.8116	4.67725	3.82707
52				0.09534	2.28655	2.98564	2.31341	0.2273	1.42983		1320.3	33.516		1404	34.496	1534.7	83.0256		1534.7	83.0256	1534.7	83.0256	1320.3	33.516	13.9702	5.14103
113				0.09143	1.36717	2.89088	1.52791	0.22935	1.36473		1331.1	32.1832		1379.5	22.5988	1455.4	50.372		1455.4	50.372	1455.4	50.372	1331.1	32.1832	8.54061	3.86133
82				0.08991	1.97976	2.8511	2.05219	0.22999	1.47833		1334.5	34.9076		1369.1	30.2428	1423.6	73.2452		1423.6	73.2452	1423.6	73.2452	1334.5	34.9076	6.25878	5.41059
95				0.08785	1.69607	2.79903	1.7774	0.23112	1.37158		1340.4	32.4772		1355.3	26.068	1379.2	62.9356		1379.2	62.9356	1379.2	62.9356	1340.4	32.4772	2.81323	5.02122
71				0.09046	1.60292	2.8882	1.70141	0.23156	1.34738		1342.7	31.9872		1378.8	25.1468	1435.2	59.4272		1435.2	59.4272	1435.2	59.4272	1342.7	31.9872	6.44509	4.46921
59				0.08884	1.6434	2.87536	1.75978	0.23484	1.34986		1359.8	32.3988		1375.5	25.9896	1400.7	61.1324		1400.7	61.1324	1400.7	61.1324	1359.8	32.3988	2.91997	4.82723
48				0.09431	2.19489	3.0788	2.22489	0.23703	1.40067		1371.3	33.9472		1427.4	33.418	1514.3	79.968		1514.3	79.968	1514.3	79.968	1371.3	33.9472	9.44331	5.28154
78				0.08685	1.24352	2.84439	1.42913	0.23754	1.30083		1373.9	31.5756		1367.3	21.0504	1357.2	46.4128		1357.2	46.4128	1357.2	46.4128	1373.9	31.5756	-1.23047	4.17097
77				0.09281	1.21754	3.06764	1.44965	0.23971	1.35998		1385.2	33.2416		1424.6	21.756	1484	45.1388		1484	45.1388	1484	45.1388	1385.2	33.2416	6.65768	3.61644
68				0.09139	1.49907	3.05999	1.63072	0.24288	1.34223		1401.6	33.124		1422.7	24.4608	1454.7	55.468		1454.7	55.468	1454.7	55.468	1401.6	33.124	3.65024	4.32226
114				0.08732	1.29409	2.9304	1.49468	0.24339	1.35174		1404.3	33.4768		1389.8	22.1676	1367.5	48.412		1367.5	48.412	1367.5	48.412	1404.3	33.4768	-2.69104	4.38285
108				0.09564	1.24425	3.24352	1.43825	0.24597	1.3213		1417.6	32.928		1467.6	21.8736	1540.7	45.5896		1540.7	45.5896	1540.7	45.5896	1417.6	32.928	7.98987	3.46124
104				0.0949	1.44362	3.26595	1.59892	0.24962	1.36207		1436.5	34.3588		1473	24.3628	1526.1	52.9788		1526.1	52.9788	1526.1	52.9788	1436.5	34.3588	5.87117	3.96821
114				0.09612	1.23804	3.32821	1.45784	0.25114	1.35383		1444.4	34.3784		1487.7	22.3048	1550	45.3152		1550	45.3152	1550	45.3152	1444.4	34.3784	6.8129	3.51306
30				0.09389	1.25679	3.24446	1.36879	0.25142	1.20913		1445.8	30.6936		1467.9	20.8152	1505.8	46.2952		1505.8	46.2952	1505.8	46.2952	1445.8	30.6936	3.98459	3.58733
85				0.09196	1.32666	3.20804	1.46195	0.25306	1.28033		1454.2	32.6144		1459.1	22.1872	1466.5	49.1176		1466.5	49.1176	1466.5	49.1176	1454.2	32.6144	0.838732	3.99706
57				0.09234	1.60277	3.23507	1.71805	0.25423	1.34131		1460.3	34.3588		1465.6	26.1268	1474.2	59.29		1474.2	59.29	1474.2	59.29	1460.3	34.3588	0.942884	4.61559
35				0.09349	1.63654	3.55524	1.70199	0.27647	1.28405		1573.6	35.1428		1539.6	26.4404	1497.8	59.9172		1497.8	59.9172	1497.8	59.9172	1497.8	59.9172	-5.06076	4.81338
84				0.09426	1.40038	3.4476	1.56138	0.26527	1.34203		1516.7	35.4956		1515.3	24.0884	1513.4	51.352		1513.4	51.352	1513.4	51.352	1513.4	51.352	-0.218052	4.13095
77				0.09667	1.60339	3.50364	1.72449	0.26291	1.38831		1504.7	36.5344		1528	26.6952	1560.9	58.3296		1560.9	58.3296	1560.9	58.3296	1560.9	58.3296	3.60049	4.29599
94				0.09991	1.38124	3.89585	1.52598	0.28288	1.32565		1605.8	36.9656		1612.8	24.1668	1622.4	49.98		1622.4	49.98	1622.4	49.98	1622.4	49.98	1.02318	3.80636
110				0.1023	1.39785	4.261	1.53556	0.3021	1.33731		1701.7	39.2392		1685.9	24.7548	1666.2	50.2544		1666.2	50.2544	1666.2	50.2544	1666.2	50.2544	-2.1306	3.87747
110				0.10273	1.14864	4.28252	1.39077	0.30232	1.34626		1702.8	39.4548		1690	22.442	1674	41.2188		1674	41.2188	1674	41.2188	1674	41.2188	-1.72043	3.43924
50				0.10635	1.37283	4.1444	1.50492	0.28292	1.29365		1606.1	36.064		1663.1	24.1276	1737.7	48.9412		1737.7	48.9412	1737.7	48.9412	1737.7	48.9412	7.57323	3.3292
1				0.10721	1.16594	4.42601	1.39064	0.2994	1.32933		1688.4	38.7492		1717.2	22.5792	1752.6	41.3168		1752.6	41.3168	1752.6	41.3168	1752.6	41.3168	3.66313	3.16958
1				0.11042	1.37656	4.40661	1.4013	0.29185	1.15813		1650.8	33.0652		1713.6	22.736	1806.4	48.6276		1806.4	48.6276	1806.4	48.6276	1806.4	48.6276	8.61382	3.06636
67				0.11261	1.17219	4.56479	1.39327	0.2941	1.32268		1662	37.9848		1742.9	22.736	1841.9	41.4148		1841.9	41.4148	1841.9	41.4148	1841.9	41.4148	9.76709	2.89296
39				0.11528	1.34455	5.39749	1.45771	0.34026	1.26374		1887.9	40.5132		1884.5	24.4804	1884.3	47.1576		1884.3	47.1576	1884.3	47.1576	1884.3	47.1576	-0.191052	3.30302
70				0.11826	1.42905	5.63816	1.54838	0.34578	1.33322		1914.4	43.316		1922	26.166	1930.1	49.7252		1930.1	49.7252	1930.1	49.7252	1930.1	49.7252	0.813429	3.40094
10				0.11989	1.21778	5.71344	1.39286	0.34566	1.29896		1913.8	42.1988		1933.4	23.5984	1954.6	42.434		1954.6	42.434	1954.6	42.434	1954.6	42.434	2.08738	3.02977
33				0.12031	1.42133	5.68798	1.50704	0.34378	1.26825		1904.8	40.9444		1929.5	25.4996	1960.8	49.196		1960.8	49.196	1960.8	49.196	1960.8	49.196	2.85598	3.2095
89				0.12439	1.22196	6.16743	1.41518	0.35962	1.32084		1980.4	44.1		1999.8	24.2256	2020.1	42.1008		2020.1	42.1008	2020.1	42.1008	2020.1	42.1008	1.96525	2.99001
98				0.19559	1.12991	14.372	1.30921	0.53297	1.2815		2754	56.2912		2774.6	24.3628	2789.8	36.1032		2789.8	36.1032	2789.8	36.1032	2789.8	36.1032	1.28325	2.38817
69				0.19932	1.05358	13.5175	1.2836	0.49192	1.28273		2579	53.41		2716.5	23.7944	2820.6	33.4964		2820.6	33.4964	2820.6	33.4964	2820.6	33.4964	8.56555	2.18281
72				0.22663	1.08988	18.4291	1.35227	0.58976	1.36496		2988.5	63.9744		3012.4	25.5192	3028.4	34.104		3028.4	34.104	3028.4	34.104	3028.4	34.104	1.31753	2.38696
72				0.22902	1.1702	18.2174	1.37523	0.57695	1.345		2936.3	62.1516		3001.3	25.9504	3045.2	36.4756		3045.2	36.4756	3045.2	36.4756	3045.2	36.4756	3.57612	2.3451
Rejected Analyses (>10% discordant; >5% reverse discordant; >10% 2σ uncertainty)
29				0.09417	1.52915	2.85609	1.59554	0.22068	1.25068		1285.5	28.518		1370.4	23.52	1511.5	56.0756		1511.5	56.0756	1511.5	56.0756	1285.5	28.518	14.952	3.6763	x		x
87				0.09066	1.34569	2.54908	1.48524	0.20395	1.28953		1196.5	27.636		1286.2	21.2268	1439.3	49.7252		1439.3	49.7252	1196.5	27.636	1196.5	27.636	16.8693	3.45474	x		x
13				0.08202	2.03609	1.93064	2.02938	0.17169	1.26391		1021.4	23.3632		1091.8	26.6168	1246.1	76.6556		1246.1	76.6556	1021.4	23.3632	1021.4	23.3632	18.0323	5.37965	x		x
62				0.09519	1.22912	2.81902	1.41787	0.21485	1.29858		1254.6	29.0472		1360.6	20.8348	1531.9	45.0016		1531.9	45.0016	1531.9	45.0016	1254.6	29.0472	18.1017	3.06327	x		x
17				0.08222	3.27171	1.93062	3.22487	0.17119	1.42532		1018.6	26.2836		1091.8	42.2772	1250.7	122.755		1250.7	122.755	1018.6	26.2836	1018.6	26.2836	18.5576	8.26511	x		x
15				0.0833	2.73709	1.99759	2.69925	0.17488	1.35522		1039	25.5388		1114.7	35.8092	1275.9	102.998		1275.9	102.998	1039	25.5388	1039	25.5388	18.5673	6.8717	x		x
9				0.08439	2.34625	2.05117	2.31819	0.17751	1.29007		1053.4	24.5588		1132.7	31.0072	1301.4	88.1216		1301.4	88.1216	1053.4	24.5588	1053.4	24.5588	19.0564	5.7967	x		x
39				0.11999	2.0085	4.59907	2.08368	0.27822	1.62461		1582.4	44.7272		1749.1	34.0648	1956.1	69.4232		1956.1	69.4232	1956.1	69.4232	1956.1	69.4232	19.1043	3.67031	x		x
10				0.13488	1.54211	5.67493	1.55667	0.30721	1.23368		1727	36.6128		1927.6	26.3424	2162.5	52.3124		2162.5	52.3124	2162.5	52.3124	2162.5	52.3124	20.1387	2.5688	x		x
47				0.08792	2.83212	2.25936	2.7676	0.18642	1.65755		1102	32.8692		1199.7	38.1808	1380.7	104.762		1380.7	104.762	1102	32.8692	1102	32.8692	20.1854	6.50712	x		x
99				0.11904	1.70531	4.42486	1.79147	0.26969	1.46464		1539.2	39.298		1717	29.0864	1941.8	59.2116		1941.8	59.2116	1941.8	59.2116	1941.8	59.2116	20.7333	3.15247	x		x
22				0.08612	1.5908	2.12392	1.6027	0.17877	1.23623		1060.3	23.7356		1156.6	21.6776	1340.8	59.6428		1340.8	59.6428	1060.3	23.7356	1060.3	23.7356	20.9203	3.93802	x		x
113				0.09341	1.28466	2.56653	1.46151	0.1993	1.3146		1171.6	27.6556		1291.2	20.9328	1496.1	47.3732		1496.1	47.3732	1171.6	27.6556	1171.6	27.6556	21.6897	3.09284	x		x
20				0.08071	1.44963	1.75716	1.50812	0.15865	1.1976		949.3	20.678		1029.8	19.1296	1214.5	55.37		1214.5	55.37	949.3	20.678	949.3	20.678	21.8361	3.94939	x		x
41				0.08819	8.44767	2.20952	8.31357	0.18201	2.20867		1077.9	43.0024		1184.1	113.896	1386.6	302.114	x	1386.6	302.114	1077.9	43.0024	1077.9	43.0024	22.2631	17.219			x
55				0.08291	3.96816	1.86968	3.92313	0.16365	1.6132		977.1	28.714		1070.4	50.8816	1267.1	147.902	x	1267.1	147.902	977.1	28.714	977.1	28.714	22.8869	9.28187	x		x
27				0.08445	1.32623	1.94538	1.41515	0.16766	1.20482		999.2	21.854		1096.9	18.6004	1302.7	50.1368		1302.7	50.1368	999.2	21.854	999.2	21.854	23.2978	3.39541	x		x
5				0.09228	1.60381	2.38592	1.61573	0.18893	1.19092		1115.6	23.8728		1238.4	22.6576	1473.1	59.3096		1473.1	59.3096	1115.6	23.8728	1115.6	23.8728	24.2685	3.453	x		x
8				0.08804	1.77192	2.10587	1.87998	0.17347	1.42964		1031.2	26.754		1150.7	25.3624	1383.4	66.1108		1383.4	66.1108	1031.2	26.754	1031.2	26.754	25.459	4.05333	x		x
18				0.08732	1.45442	2.05994	1.59762	0.17111	1.33832		1018.2	24.7548		1135.6	21.4032	1367.5	54.5272		1367.5	54.5272	1018.2	24.7548	1018.2	24.7548	25.543	3.47723	x		x
24				0.09162	1.23336	2.27837	1.46113	0.18034	1.35854		1068.8	26.1856		1205.6	20.2076	1459.5	45.7268		1459.5	45.7268	1068.8	26.1856	1068.8	26.1856	26.7694	2.91256	x		x
21				0.08375	1.40896	1.78934	1.48267	0.1556	1.2018		932.3	20.482		1041.6	18.9336	1286.6	53.508		1286.6	53.508	932.3	20.482	932.3	20.482	27.5377	3.40825	x		x
3				0.08868	1.58999	2.0516	1.59583	0.16911	1.17675		1007.2	21.5404		1132.8	21.364	1397.2	58.8392		1397.2	58.8392	1007.2	21.5404	1007.2	21.5404	27.913	3.40478	x		x
81				0.0975	1.74359	2.56243	1.81117	0.19063	1.37439		1124.8	27.7928		1290	25.9308	1576.8	63.308		1576.8	63.308	1124.8	27.7928	1124.8	27.7928	28.6657	3.36297	x		x
4				0.09893	1.45557	2.55991	1.48091	0.18912	1.16857		1116.6	23.5004		1289.3	21.1876	1604	52.9004		1604	52.9004	1116.6	23.5004	1116.6	23.5004	30.3865	2.72352	x		x
90				0.09621	3.74181	2.41675	3.6185	0.1822	1.8551		1079	36.0836		1247.6	50.9404	1551.8	134.652		1551.8	134.652	1079	36.0836	1079	36.0836	30.4678	6.46598	x		x
11				0.08469	1.29885	1.75027	1.35522	0.15079	1.16055		905.4	19.1688		1027.3	17.1696	1308.4	48.8628		1308.4	48.8628	905.4	19.1688	905.4	19.1688	30.801	2.97066	x		x
28				0.10593	1.27443	2.96978	1.36912	0.20401	1.21072		1196.8	25.8916		1399.9	20.384	1730.5	45.3348		1730.5	45.3348	1196.8	25.8916	1196.8	25.8916	30.8408	2.34972	x		x
37				0.11188	1.20665	3.33143	1.33606	0.21644	1.22436		1263	27.5576		1488.4	20.4428	1830.2	42.4732		1830.2	42.4732	1830.2	42.4732	1263	27.5576	30.9911	2.19816	x		x
93				0.08855	1.4568	1.89839	1.56343	0.15547	1.30572		931.6	22.246		1080.5	20.384	1394.5	54.0764		1394.5	54.0764	931.6	22.246	931.6	22.246	33.1947	3.04238	x		x
109				0.10045	1.5331	2.52478	1.63301	0.18231	1.35484		1079.6	26.362		1279.2	23.2848	1632.4	55.3308		1632.4	55.3308	1079.6	26.362	1079.6	26.362	33.8642	2.76282	x		x
86				0.10928	1.38177	3.01252	1.54223	0.19996	1.35027		1175.1	28.4592		1410.8	23.0496	1787.4	48.9412		1787.4	48.9412	1175.1	28.4592	1175.1	28.4592	34.2565	2.40326	x		x
40				0.14226	1.13876	5.0327	1.28957	0.25707	1.22924		1474.8	31.7128		1824.8	21.4032	2254.9	38.318		2254.9	38.318	2254.9	38.318	1474.8	31.7128	34.5958	1.79255	x		x
91				0.08352	1.17337	1.51759	1.37982	0.1318	1.28983		798.1	18.9728		937.5	16.562	1281.2	44.7272		798.1	18.9728	798.1	18.9728	798.1	18.9728	37.7068	2.631	x		x
18				0.10255	1.87226	2.39346	1.8772	0.17013	1.2755		1012.8	23.422		1240.6	26.3424	1670.8	67.1496		1670.8	67.1496	1012.8	23.422	1012.8	23.422	39.3823	2.81076	x		x
44				0.09892	1.91063	2.21295	1.95305	0.16248	1.35401		970.6	23.8728		1185.1	26.7736	1603.8	68.9136		1603.8	68.9136	970.6	23.8728	970.6	23.8728	39.4812	2.99631	x		x
1				0.11448	1.27533	2.73107	1.30681	0.17445	1.135		1036.6	21.3444		1336.9	19.0316	1871.6	44.6292		1871.6	44.6292	1036.6	21.3444	1036.6	21.3444	44.6142	1.74495	x		x
112				0.09492	1.44332	1.72272	1.58412	0.13165	1.35967		797.2	19.9332		1017	19.9528	1526.5	52.8612		797.2	19.9332	797.2	19.9332	797.2	19.9332	47.776	2.23063	x		x
26				0.09781	2.40262	1.69379	2.38046	0.12605	1.37247		765.3	19.3648		1006.2	29.792	1582.7	86.7888		765.3	19.3648	765.3	19.3648	765.3	19.3648	51.6459	2.92022	x		x
75				0.08643	1.06445	1.26535	1.29845	0.10618	1.27143		650.5	15.4644		830.3	14.4256	1347.8	40.278		650.5	15.4644	650.5	15.4644	650.5	15.4644	51.7362	1.84304	x		x
34				0.0932	1.84549	1.18499	1.88103	0.09244	1.29814		570	13.8964		793.6	20.3056	1492	67.718		570	13.8964	570	13.8964	570	13.8964	61.7962	1.96828	x		x
66				0.10869	3.40418	1.40701	3.27432	0.09391	1.90608		578.6	20.678		891.9	38.1024	1777.5	119.286		578.6	20.678	578.6	20.678	578.6	20.678	67.4487	2.47492	x		x
6				0.14701	3.29229	2.29706	3.15142	0.11416	1.59425		696.9	20.6584		1211.4	43.6884	2311.4	108.8		696.9	20.6584	696.9	20.6584	696.9	20.6584	69.8494	1.67719	x		x
25				0.11553	16.5412	1.43711	10.9331	0.09159	3.19904		564.9	33.908		904.5	128.302	1888.1	531.591	x	564.9	33.908	564.9	33.908	564.9	33.908	70.081	8.61294	x		x
14				0.20422	2.3651	3.28297	2.22817	0.11724	1.51825		714.7	20.1292		1477	33.9864	2860.2	74.3624		714.7	20.1292	714.7	20.1292	714.7	20.1292	75.0122	0.957782	x		x
7				0.13274	1.20536	1.40243	1.25639	0.07718	1.14019		479.3	10.3096		890	14.602	2134.5	41.1012		479.3	10.3096	479.3	10.3096	479.3	10.3096	77.5451	0.648262	x		x
63				0.15084	3.36118	1.32609	3.23734	0.06378	1.75604		398.6	13.328		857.2	36.7304	2355.5	110.27		398.6	13.328	398.6	13.328	398.6	13.328	83.0779	0.973507	x		x
13WW29, Map Unit Pu, White Uplift (Cryogenian), University of Arizona, n=200/218
109	160.889	33085.8	1.53141	0.0717513	1.4088	1.6383	3.0902	0.165601	2.75038	0.890034	987.827	49.3722		985.059	38.194	978.876	56.2326		978.876	56.2326	987.827	49.3722	987.827	49.3722	-0.914426	7.68417
147	62.9701	37239.5	1.27433	0.0719246	2.10038	1.64648	3.15952	0.166027	2.3603	0.747043	990.184	42.4632		988.203	39.1248	983.798	83.7811		983.798	83.7811	990.184	42.4632	990.184	42.4632	-0.649143	9.59679
177	249.357	40634.7	1.20942	0.0709014	1.60239	1.62388	3.15873	0.166111	2.72212	0.861777	990.648	48.9939		979.494	38.9103	954.552	64.215		954.552	64.215	990.648	48.9939	990.648	48.9939	-3.78145	8.66529
14	56.5858	82976.5	0.987744	0.0740855	1.71791	1.7353	3.62662	0.169879	3.19392	0.880689	1011.44	58.6003		1021.72	45.7966	1043.78	67.9706		1043.78	67.9706	1011.44	58.6003	1011.44	58.6003	3.09785	8.44624
94	116.68	40627.9	2.60112	0.0722684	1.55593	1.70858	2.52312	0.171469	1.98626	0.787222	1020.2	36.7338		1011.75	31.6778	993.519	61.9612		993.519	61.9612	1020.2	36.7338	1020.2	36.7338	-2.68545	7.39471
8	455.533	124314	2.43214	0.0732398	1.68874	1.73904	3.7328	0.172211	3.32895	0.891811	1024.28	61.7931		1023.11	47.1751	1020.58	67.0141		1020.58	67.0141	1024.28	61.7931	1024.28	61.7931	-0.362969	8.94927
29	307.178	132195	1.46	0.077626	1.90714	1.87724	4.81976	0.175393	4.42639	0.918384	1041.76	83.4564		1073.09	62.6036	1137.34	74.3721		1137.34	74.3721	1041.76	83.4564	1041.76	83.4564	8.40379	9.47206
180	84.3062	80022.9	1.63206	0.0761688	2.38329	1.8477	3.0603	0.175935	1.91974	0.627302	1044.73	36.2899		1062.61	39.5225	1099.5	93.447		1099.5	93.447	1044.73	36.2899	1044.73	36.2899	4.98139	8.72413
101	167.469	38024	1.03404	0.0738349	1.53935	1.80224	2.85893	0.177031	2.40913	0.842667	1050.73	45.7823		1046.27	36.597	1036.94	60.9695		1036.94	60.9695	1050.73	45.7823	1050.73	45.7823	-1.33057	7.41561
97	75.0455	144443	1.62673	0.0785966	2.55788	1.91986	3.60463	0.17716	2.5398	0.704595	1051.44	48.2955		1088.02	47.1776	1161.97	99.4245		1161.97	99.4245	1051.44	48.2955	1051.44	48.2955	9.51264	8.78762
196	424.166	68100.7	3.32534	0.0826257	1.63281	2.02008	5.20692	0.177318	4.94428	0.94956	1052.31	94.0902		1122.29	69.3414	1260.41	62.5488		1260.41	62.5488	1052.31	94.0902	1052.31	94.0902	16.5105	8.53779
95	691.045	82828.2	3.5066	0.0810043	1.57884	1.99387	2.93925	0.17852	2.47921	0.843483	1058.88	47.4504		1113.43	38.9621	1221.56	60.7995		1221.56	60.7995	1058.88	47.4504	1058.88	47.4504	13.3171	5.80539
126	248.584	160631	2.42866	0.0757829	1.84485	1.87338	2.56636	0.179289	1.78403	0.695158	1063.09	34.2698		1071.73	33.3026	1089.34	72.4397		1089.34	72.4397	1063.09	34.2698	1063.09	34.2698	2.40925	7.212
120	102.122	31874.6	1.45842	0.0765187	1.99748	1.89564	4.6467	0.179674	4.19546	0.902891	1065.2	80.7391		1079.56	60.5585	1108.66	78.2259		1108.66	78.2259	1065.2	80.7391	1065.2	80.7391	3.92016	9.94965
162	84.3713	29391.4	1.89286	0.0755917	1.91842	1.87358	3.83433	0.179762	3.3199	0.865837	1065.67	63.9155		1071.8	49.764	1084.3	75.3731		1084.3	75.3731	1065.67	63.9155	1065.67	63.9155	1.71757	9.02343
144	172.794	41655	2.68062	0.0744964	1.77189	1.86549	2.61621	0.181617	1.92483	0.735731	1075.8	37.3806		1068.93	33.8996	1054.97	69.9513		1054.97	69.9513	1075.8	37.3806	1075.8	37.3806	-1.9747	7.63374
17	519.706	112455	1.61971	0.0763354	1.98973	1.9126	2.87633	0.181717	2.07708	0.722127	1076.35	40.3563		1085.49	37.5941	1103.9	77.944		1103.9	77.944	1076.35	40.3563	1076.35	40.3563	2.49572	7.79501
135	257.601	92009.5	2.19629	0.0762805	2.05162	1.92498	3.03189	0.183026	2.23231	0.736276	1083.48	43.6362		1089.8	39.7155	1102.46	80.398		1102.46	80.398	1083.48	43.6362	1083.48	43.6362	1.72145	8.18737
166	183.357	82920.2	2.96308	0.077927	1.84547	1.96807	2.91521	0.183169	2.2567	0.774112	1084.26	44.1423		1104.65	38.4748	1145.03	71.9244		1145.03	71.9244	1084.26	44.1423	1084.26	44.1423	5.30734	7.0881
96	295.997	1.26932e+06	3.55891	0.0752477	2.08543	1.90576	3.73268	0.183685	3.09579	0.829373	1087.08	60.6997		1083.11	48.7307	1075.14	82.1177		1075.14	82.1177	1087.08	60.6997	1087.08	60.6997	-1.10982	9.56623
107	584.967	705293	3.73948	0.0767152	1.64426	1.94458	5.04643	0.183842	4.77104	0.94543	1087.93	93.6151		1096.58	66.3489	1113.78	64.3203		1113.78	64.3203	1087.93	93.6151	1087.93	93.6151	2.32088	10.1226
21	137.748	35383.3	1.51081	0.0749575	1.98897	1.9072	3.01462	0.184536	2.26538	0.751465	1091.71	44.5913		1083.61	39.3638	1067.38	78.3891		1067.38	78.3891	1091.71	44.5913	1091.71	44.5913	-2.27911	8.59502
189	581.544	97575.1	13.5398	0.0754416	1.65966	1.93579	4.22836	0.1861	3.88903	0.919749	1100.21	77.0986		1093.54	55.5014	1080.31	65.2335		1080.31	65.2335	1100.21	77.0986	1100.21	77.0986	-1.84262	9.42079
24	243.191	66033.1	1.0722	0.0776703	2.2914	1.99703	3.67515	0.186478	2.87337	0.781837	1102.27	57.0607		1114.51	48.7463	1138.47	89.382		1138.47	89.382	1102.27	57.0607	1102.27	57.0607	3.18003	9.10503
27	479.1	51834.7	2.29117	0.0744885	2.19653	1.91842	3.31256	0.18679	2.47958	0.748538	1103.96	49.3099		1087.52	43.3426	1054.75	86.7422		1054.75	86.7422	1103.96	49.3099	1103.96	49.3099	-4.66533	9.79524
1	38.9628	44189.5	0.934079	0.0769017	2.67687	1.98245	4.64327	0.186967	3.79398	0.817093	1104.92	75.5094		1109.55	61.4436	1118.66	104.688		1118.66	104.688	1104.92	75.5094	1104.92	75.5094	1.22805	11.4457
214	311.57	111129	255.111	0.0799004	2.0815	2.06029	4.43591	0.187016	3.91722	0.883072	1105.19	77.9793		1135.72	59.4516	1194.55	80.533		1194.55	80.533	1105.19	77.9793	1105.19	77.9793	7.4808	9.02877
153	190.867	57253.4	2.20806	0.0783049	1.4085	2.03375	2.80021	0.188368	2.42019	0.864287	1112.53	48.4708		1126.87	37.3633	1154.6	54.8225		1154.6	54.8225	1112.53	48.4708	1112.53	48.4708	3.64414	6.20932
220	171.113	59970.9	2.60812	0.0795613	1.69542	2.06994	3.61955	0.188693	3.19792	0.883514	1114.29	64.1403		1138.91	48.5797	1186.15	65.6512		1186.15	65.6512	1114.29	64.1403	1114.29	64.1403	6.05872	7.50163
79	424.236	61722.4	5.56521	0.0781574	1.50297	2.03771	2.67972	0.189091	2.21855	0.827906	1116.45	44.576		1128.2	35.7781	1150.88	58.4945		1150.88	58.4945	1116.45	44.576	1116.45	44.576	2.99184	6.26992
197	219.766	97991.6	2.66324	0.0845078	2.19915	2.21588	2.83051	0.190173	1.78201	0.629572	1122.31	35.977		1186.07	38.8198	1304.25	83.7267		1304.25	83.7267	1122.31	35.977	1122.31	35.977	13.9496	6.17446
193	288.542	165840	2.89635	0.0786536	1.9788	2.08054	3.39563	0.191848	2.75946	0.812652	1131.38	56.1226		1142.41	45.649	1163.41	76.8352		1163.41	76.8352	1131.38	56.1226	1131.38	56.1226	2.75352	8.03234
136	315.075	160136	3.7508	0.076513	1.32149	2.02765	3.44332	0.192202	3.17964	0.923423	1133.29	64.7684		1124.83	45.9016	1108.51	51.723		1108.51	51.723	1133.29	64.7684	1133.29	64.7684	-2.23579	7.54287
108	535.404	1.43327e+06	3.21473	0.0798995	1.67957	2.12441	3.26308	0.192838	2.79763	0.857359	1136.73	57.1452		1156.77	44.1627	1194.53	64.9534		1194.53	64.9534	1136.73	57.1452	1136.73	57.1452	4.83821	7.04708
156	581.64	126694	3.08728	0.0788383	1.43818	2.10149	2.62869	0.193326	2.20038	0.837061	1139.37	45.0406		1149.3	35.4511	1168.06	55.813		1168.06	55.813	1139.37	45.0406	1139.37	45.0406	2.45662	6.04919
133	458.22	208053	2.15123	0.0808752	2.6259	2.15964	3.75261	0.193671	2.6808	0.714383	1141.23	54.9568		1168.15	51.0573	1218.41	101.235		1218.41	101.235	1141.23	54.9568	1141.23	54.9568	6.3348	8.99507
165	232.436	846795	3.0863	0.0802582	1.99962	2.15398	2.82909	0.194648	2.00132	0.707407	1146.51	41.2004		1166.33	38.4564	1203.32	77.2329		1203.32	77.2329	1146.51	41.2004	1146.51	41.2004	4.72169	7.00852
61	41.0916	31609.5	1.0439	0.0863923	3.26842	2.3437	4.36729	0.196755	2.89666	0.663262	1157.86	60.172		1225.65	60.9408	1346.96	123.709		1346.96	123.709	1157.86	60.172	1157.86	60.172	14.0387	9.07122
7	142.473	147722	2.79783	0.0789114	1.84509	2.15086	5.33598	0.197684	5.00683	0.938315	1162.87	104.418		1165.33	72.523	1169.89	71.6455		1169.89	71.6455	1162.87	104.418	1162.87	104.418	0.600568	10.8037
183	137.145	47060.3	1.94879	0.081377	1.9539	2.22558	3.09347	0.198354	2.3983	0.775279	1166.47	50.1575		1189.13	42.4848	1230.58	75.1847		1230.58	75.1847	1166.47	50.1575	1166.47	50.1575	5.21005	7.08187
[truncated: 1,764 more rows]
[truncated: 37 more columns]

## Sheet: G48336
Gibson, T.M., et al., 2021, A detrital zircon test of large-scale terrane displacement along the Arctic margin of North America: Geology, v. 49, https://doi.org/10.1130/G48336.1
